# Supplementary material for: Large-scale network analysis of the cerebrospinal fluid proteome identifies molecular signatures of frontotemporal lobar degeneration
Source: Research Square preprint supplement (doi:10.21203/rs.3.rs-4103685/v1), 2024-03-28
Supplement: Supplementary file 1 [file daf6396c2da1f159ac0b9429.xlsx]

## Sheet: Table of Contents
Table of Contents
Table 1. Genetic FTLD Cohort Characteristics
Table 2. CSF Network Module Memberships
Table 3. CSF Network Module GO Term Enrichment
Table 4. CSF Network Eigenprotein Group Differences
Table 5. CSF Network Proteins Differential Abundance
Table 6. Count (Percentage) of Differentially Abundant Proteins per Module
Table 7. Module Correlations with Global Cognitive Trajectories
Table 8. CSF Network Changes in Sporadic PSP-RS
Table 9. CSF Network Changes in Clinical FTD and AD

## Sheet: 1. Cohort Characteristics
Supplementary Table 1. ALLFTD Cohort Characteristics
	Mutation Carriers
	C9orf72	GRN	MAPT	Non-carrier Controls	p-value	Pairwise comparison
Sample size	47	32	37	39
Age, mean (SD)	49.9 (13)	57.9 (10.1)	44.5 (12.5)	45.8 (12.3)	4e-05	GRN > (C9orf72 = MAPT = Control)
Education years, mean (SD)	15 (2.3)	15.7 (2.9)	15.6 (2.2)	15.6 (2.8)	0.462
Female, n (%)	26 (55)	17 (53)	18 (49)	23 (59)	0.873
CDR+NACC-FTLD Global					0.382
0 (Presymptomatic/Control)	24	12	18	39
0.5 (Symptomatic)	6	5	8	--
> 1 (Symptomatic)	17	14	11	--
Symptomatic diagnoses
bvFTD	9	5	12	--	0.218
PPA	0	3	0	--	0.02	GRN > (C9orf72 = MAPT)
CBS	0	2	0	--	0.074
FTD-MND	4	0	0	--	0.039	C9orf72 > (GRN = MAPT)
MCI	8	5	7	--	0.953
AD dementia	0	4	0	--	0.005	GRN > (C9orf72 = MAPT)
PD spectrum	1	0	0	--	--
Not specified	1	0	0	--	--
Number of Study Visits, median [IQR]	3 [1, 4]	3 [1, 3]	4 [3, 5.5]	3 [2, 5]	0.003	MAPT > (C9orf72 = GRN); Control > GRN
Note: 1 GRN subject was missing CDR+NACC-FTLD Global and diagnostic data; bvFTD, behavioral variant frontotemporal dementia; PPA, primary progressive aphasia; CBS, corticobasal syndrome; FTD-MND, frontotemporal dementia - motor neuron disease; MCI, mild cognitive impairment; AD, Alzheimer's disease; PD, parkinson's disease

## Sheet: 2. Module Membership
Supplementary Table 2. CSF Network Module Memberships
Module memberships of n=4,318 proteins quantified across a total of n=155 case samples after network connectivity outlier removal. kME, Pearson correlation coefficient between each protein and its module eigenprotein.
Protein Name|UniProt ID	net$colors	kMEturquoise	kMEblue	kMEbrown	kMEyellow	kMEgreen	kMEred	kMEblack	kMEpink	kMEmagenta	kMEpurple	kMEgreenyellow	kMEtan	kMEsalmon	kMEcyan	kMEmidnightblue	kMElightcyan	kMEgrey60	kMElightgreen	kMElightyellow	kMEroyalblue	kMEdarkred	kMEdarkgreen	kMEdarkturquoise	kMEdarkgrey	kMEorange	kMEdarkorange	kMEwhite	kMEskyblue	kMEsaddlebrown	kMEsteelblue	kMEpaleturquoise	kMEtableSortVector
CD70|P32970	turquoise	0.895726	-0.0339456	-0.380926	-0.238009	0.566115	0.553876	-0.446682	0.703827	-0.221669	0.485143	0.0376739	0.12062	-0.710789	-0.379837	-0.395301	-0.174646	-0.161404	0.400086	-0.404959	0.544495	-0.240059	0.291275	-0.12008	0.478658	-0.194725	-0.233216	0.166617	-0.100823	0.205727	-0.00475213	0.240543	M1 turquoise DNA Repair|0.8957
SUSD3|Q96L08	turquoise	0.880732	-0.0575476	-0.420054	-0.216638	0.532974	0.54928	-0.438892	0.719553	-0.219235	0.425261	-0.0436654	0.0483023	-0.696667	-0.404499	-0.42353	-0.175304	-0.122381	0.475806	-0.353153	0.44588	-0.281687	0.304873	-0.111571	0.451798	-0.19821	-0.272887	0.212258	-0.0729582	0.208815	-0.0831487	0.295729	M1 turquoise DNA Repair|0.8807
CD300LF|Q8TDQ1	turquoise	0.867223	0.0379694	-0.270033	-0.255224	0.572892	0.722214	-0.336817	0.558772	-0.385059	0.419415	0.267477	0.0507089	-0.720466	-0.261489	-0.289654	-0.230822	-0.333221	0.280102	-0.520183	0.480202	-0.3837	0.217681	-0.202406	0.53718	-0.186962	-0.216071	0.0329398	-0.0811581	0.140644	0.0523276	0.190112	M1 turquoise DNA Repair|0.8672
ESRP1|Q6NXG1	turquoise	0.864965	0.105513	-0.232866	-0.309781	0.613861	0.726122	-0.35813	0.730786	-0.45772	0.478397	0.338652	0.0567774	-0.630993	-0.355605	-0.117984	-0.180284	-0.30277	0.380712	-0.441932	0.361406	-0.316492	0.32854	-0.0910521	0.566393	-0.190837	-0.315556	0.0826286	-0.101111	0.160591	0.152529	0.247736	M1 turquoise DNA Repair|0.865
MLYCD|O95822	turquoise	0.861181	0.161869	-0.19999	-0.342851	0.64087	0.736052	-0.357934	0.637255	-0.462761	0.338917	0.273492	-0.00774933	-0.637741	-0.316808	-0.16541	-0.0923944	-0.186598	0.356697	-0.364701	0.34821	-0.347883	0.306021	-0.038566	0.424761	-0.217868	-0.255233	0.052205	-0.0286327	0.105567	0.129798	0.20886	M1 turquoise DNA Repair|0.8612
TPSG1|Q9NRR2	turquoise	0.856507	-0.050917	-0.356666	-0.215721	0.714118	0.684685	-0.369971	0.681774	-0.379778	0.361025	0.152585	0.00612242	-0.700975	-0.285562	-0.291941	-0.259016	-0.108857	0.372533	-0.467224	0.405251	-0.353959	0.162929	0.0556738	0.456636	-0.15106	-0.246753	0.159905	-0.140269	0.299095	-0.019499	0.193939	M1 turquoise DNA Repair|0.8565
LDLR|P01130	turquoise	0.85626	-0.107335	-0.360584	-0.125267	0.541871	0.68636	-0.293305	0.560673	-0.38652	0.389281	0.200998	0.0977395	-0.798137	-0.160813	-0.368808	-0.360105	-0.291187	0.164538	-0.637446	0.441652	-0.357818	0.0737169	-0.227474	0.583826	-0.083267	-0.154277	0.11447	-0.182656	0.281348	-0.0015483	0.163836	M1 turquoise DNA Repair|0.8563
GJA1|P17302	turquoise	0.856169	0.0574731	-0.255937	-0.23963	0.65229	0.667081	-0.270149	0.570606	-0.376657	0.278185	0.200822	-0.0568228	-0.725264	-0.199922	-0.308777	-0.235259	-0.209766	0.287237	-0.448026	0.444747	-0.410692	0.210117	-0.0474613	0.44109	-0.143093	-0.204484	0.113685	-0.0597216	0.204679	0.016226	0.18578	M1 turquoise DNA Repair|0.8562
HPSE|Q9Y251	turquoise	0.848896	0.00115332	-0.269363	-0.224856	0.614872	0.877594	-0.287183	0.573458	-0.584696	0.32615	0.411417	-0.00775833	-0.711964	-0.175293	-0.123354	-0.306983	-0.365766	0.20734	-0.607642	0.281338	-0.458117	0.106083	-0.140647	0.539443	-0.115671	-0.187658	0.077574	-0.113194	0.213567	0.000240263	0.171	M1 turquoise DNA Repair|0.8489
HRK|O00198	turquoise	0.848802	0.0814775	-0.316823	-0.315931	0.735781	0.666687	-0.37992	0.605557	-0.348425	0.385718	0.250911	0.00622094	-0.741379	-0.349876	-0.275003	-0.225637	-0.193929	0.366688	-0.48111	0.521276	-0.380268	0.285393	0.0227654	0.448559	-0.230077	-0.305475	0.0454998	-0.100584	0.101703	0.0417526	0.2163	M1 turquoise DNA Repair|0.8488
CDHR1|Q96JP9	turquoise	0.84779	0.171422	-0.176771	-0.343596	0.503719	0.712814	-0.307953	0.691931	-0.411243	0.360918	0.211585	-0.0734838	-0.637303	-0.295341	-0.201013	-0.160556	-0.260732	0.359507	-0.334245	0.327584	-0.405301	0.367217	-0.160043	0.508442	-0.170289	-0.291634	0.103185	0.0180733	0.121828	0.158645	0.238596	M1 turquoise DNA Repair|0.8478
RMI1|Q9H9A7	turquoise	0.844238	0.103548	-0.263664	-0.300399	0.677611	0.677832	-0.373867	0.556765	-0.336666	0.388456	0.224454	-0.00581316	-0.684495	-0.337038	-0.264084	-0.125653	-0.222756	0.39225	-0.414675	0.462784	-0.368638	0.313083	0.0195899	0.42164	-0.251435	-0.285239	0.0259545	-0.082896	0.0896937	0.149036	0.174661	M1 turquoise DNA Repair|0.8442
LCORL|Q8N3X6	turquoise	0.841201	-0.0971217	-0.398608	-0.176066	0.444553	0.64287	-0.392597	0.692203	-0.369544	0.427727	0.143411	0.15434	-0.64027	-0.349615	-0.272976	-0.22107	-0.240151	0.31574	-0.450462	0.320114	-0.226469	0.141253	-0.24968	0.506943	-0.0802505	-0.168925	0.237305	-0.141387	0.276039	-0.0199054	0.238688	M1 turquoise DNA Repair|0.8412
P4HA1|P13674	turquoise	0.833212	0.0536697	-0.236847	-0.197526	0.472165	0.574136	-0.337683	0.695334	-0.301148	0.381578	0.0779454	0.0334621	-0.590401	-0.268424	-0.282327	-0.103063	-0.176306	0.371724	-0.301492	0.351522	-0.257816	0.298243	-0.158971	0.448448	-0.181191	-0.242271	0.1119	-0.0940705	0.216272	-0.0432925	0.178345	M1 turquoise DNA Repair|0.8332
FAM175A|Q6UWZ7	turquoise	0.830919	0.172717	-0.0886241	-0.282797	0.47571	0.688217	-0.200573	0.456112	-0.428621	0.297141	0.297009	-0.0647092	-0.671367	-0.160253	-0.237028	-0.153816	-0.428209	0.184818	-0.406923	0.430079	-0.431313	0.305173	-0.241359	0.48926	-0.154884	-0.210824	0.00782032	0.0380559	0.0118961	0.168592	0.171518	M1 turquoise DNA Repair|0.8309
PAK7|Q9P286	turquoise	0.830105	-0.130694	-0.441759	-0.203757	0.603172	0.501462	-0.44686	0.614175	-0.184248	0.461905	0.0238562	0.12064	-0.705994	-0.299158	-0.428137	-0.221692	-0.128163	0.336584	-0.429441	0.569365	-0.259163	0.166532	-0.0852941	0.445182	-0.153624	-0.224233	0.123013	-0.153512	0.207945	-0.0732261	0.219003	M1 turquoise DNA Repair|0.8301
DEFB103B|P81534	turquoise	0.825649	0.0642767	-0.233067	-0.27201	0.604251	0.61758	-0.22122	0.416863	-0.31421	0.275703	0.201011	-0.0598144	-0.785418	-0.163679	-0.395242	-0.184253	-0.370288	0.176751	-0.503121	0.578151	-0.455909	0.21189	-0.151253	0.538828	-0.104714	-0.106088	0.106916	-0.0989774	0.0984319	0.098177	0.0864802	M1 turquoise DNA Repair|0.8256
ITPKA|P23677	turquoise	0.825206	0.104399	-0.172709	-0.220877	0.678178	0.758483	-0.16965	0.409477	-0.435315	0.207095	0.331591	-0.141966	-0.806157	-0.135723	-0.294428	-0.23641	-0.311026	0.172204	-0.564907	0.484972	-0.541377	0.133828	-0.120677	0.501282	-0.0982545	-0.153578	0.0449133	-0.0685738	0.125067	0.0519511	0.0938623	M1 turquoise DNA Repair|0.8252
CDK2AP1|O14519	turquoise	0.824962	-0.115726	-0.305823	-0.133185	0.390805	0.743956	-0.268316	0.635834	-0.513802	0.422608	0.259463	0.0893295	-0.663132	-0.151467	-0.20948	-0.270425	-0.339446	0.202594	-0.562705	0.207334	-0.325413	0.0668433	-0.328155	0.574588	-0.034914	-0.137279	0.173016	-0.20139	0.352409	-0.0760277	0.156278	M1 turquoise DNA Repair|0.825
GRP|P07492	turquoise	0.824846	-0.152416	-0.369391	-0.0807316	0.498622	0.664958	-0.314153	0.621461	-0.392211	0.430526	0.18957	0.106325	-0.704915	-0.236512	-0.327956	-0.377367	-0.259799	0.218612	-0.555453	0.393255	-0.308238	0.0549689	-0.241112	0.534647	-0.0349561	-0.181981	0.183758	-0.222127	0.316158	-0.0861843	0.14542	M1 turquoise DNA Repair|0.8248
ETNK1|Q9HBU6	turquoise	0.824123	0.0354191	-0.326675	-0.2276	0.432637	0.568109	-0.389969	0.62555	-0.209165	0.38904	0.0152973	0.0501258	-0.642456	-0.378946	-0.390118	-0.228023	-0.190079	0.443359	-0.31426	0.406236	-0.264481	0.350702	-0.181281	0.455581	-0.232375	-0.272556	0.128677	-0.0526343	0.144141	0.0601428	0.242748	M1 turquoise DNA Repair|0.8241
ELF5|Q9UKW6	turquoise	0.823484	-0.0595625	-0.287995	-0.128667	0.347535	0.664061	-0.187903	0.576989	-0.435173	0.368616	0.217553	0.0572656	-0.721678	-0.185311	-0.301584	-0.214661	-0.39927	0.152081	-0.559969	0.306763	-0.367275	0.153175	-0.371285	0.656084	-0.0164316	-0.103466	0.233392	-0.144681	0.275927	-0.042888	0.158906	M1 turquoise DNA Repair|0.8235
BRD4|O60885	turquoise	0.821938	0.0253251	-0.321043	-0.277938	0.379791	0.487408	-0.398643	0.621313	-0.153053	0.502947	0.00261987	0.129249	-0.638592	-0.345472	-0.430307	-0.0954165	-0.25266	0.365105	-0.318746	0.517696	-0.229505	0.351416	-0.283765	0.55328	-0.180937	-0.193908	0.105117	-0.0963035	0.111697	0.0413025	0.173004	M1 turquoise DNA Repair|0.8219
KRT72|Q14CN4	turquoise	0.820298	-0.0775655	-0.37864	-0.163165	0.493391	0.516509	-0.409516	0.664102	-0.208934	0.426572	-0.0253334	0.103514	-0.614097	-0.337566	-0.363587	-0.149366	-0.118025	0.41855	-0.315857	0.406426	-0.205246	0.248621	-0.0894966	0.422606	-0.176917	-0.206465	0.187402	-0.160394	0.2284	-0.0316275	0.186803	M1 turquoise DNA Repair|0.8203
ETV5|P41161	turquoise	0.81799	-0.0301904	-0.267538	-0.143601	0.527883	0.619312	-0.274997	0.53732	-0.385518	0.36691	0.190657	0.0559196	-0.688187	-0.218812	-0.336001	-0.218517	-0.237126	0.206652	-0.470873	0.403697	-0.321557	0.188448	-0.147386	0.540365	-0.0706142	-0.18266	0.127229	-0.123082	0.1943	-0.00943503	0.148865	M1 turquoise DNA Repair|0.818
KCNN1|Q92952	turquoise	0.817413	0.0508122	-0.274985	-0.220136	0.703937	0.710716	-0.357331	0.548757	-0.4119	0.389207	0.298142	0.0297049	-0.64847	-0.295197	-0.156466	-0.18722	-0.231225	0.350738	-0.490358	0.411999	-0.348771	0.222094	0.0480861	0.450556	-0.194075	-0.247179	0.062743	-0.110272	0.131703	0.0204661	0.15036	M1 turquoise DNA Repair|0.8174
MSRB3|Q8IXL7	turquoise	0.815726	-0.0621871	-0.332318	-0.169733	0.512401	0.812946	-0.334274	0.673423	-0.55424	0.392364	0.321641	0.0862646	-0.6475	-0.219137	-0.136091	-0.289028	-0.248025	0.249301	-0.57295	0.15692	-0.336558	0.0883522	-0.205511	0.527288	-0.0915768	-0.171902	0.139398	-0.192208	0.314653	-0.0812089	0.16708	M1 turquoise DNA Repair|0.8157
PATE4|P0C8F1	turquoise	0.815397	0.0455366	-0.224896	-0.194128	0.489067	0.691853	-0.282387	0.56665	-0.419057	0.302966	0.210245	0.023012	-0.688685	-0.191034	-0.285097	-0.223594	-0.259499	0.214097	-0.482456	0.337368	-0.368273	0.164731	-0.208216	0.475618	-0.151405	-0.186963	0.0721334	-0.0481894	0.194604	0.00638361	0.191515	M1 turquoise DNA Repair|0.8154
GDF2|Q9UK05	turquoise	0.814676	-0.00451826	-0.256107	-0.211357	0.552089	0.648252	-0.275867	0.565175	-0.403183	0.425616	0.26621	0.0498544	-0.688311	-0.190555	-0.275248	-0.264626	-0.261622	0.250067	-0.536475	0.408031	-0.345551	0.168249	-0.155145	0.556765	-0.138748	-0.212774	0.0542689	-0.176041	0.233977	0.0766495	0.14237	M1 turquoise DNA Repair|0.8147
GALNT11|Q8NCW6	turquoise	0.814004	0.0726429	-0.232414	-0.324054	0.698629	0.571633	-0.339168	0.55352	-0.246574	0.301866	0.11743	-0.0795099	-0.671516	-0.270491	-0.345574	-0.167555	-0.106567	0.374194	-0.342018	0.537648	-0.364042	0.251691	0.0848462	0.396726	-0.215632	-0.255791	0.062648	-0.0110269	0.122965	0.135661	0.21481	M1 turquoise DNA Repair|0.814
EVPL|Q92817	turquoise	0.813612	-0.119053	-0.4061	-0.132349	0.503532	0.622736	-0.36913	0.6338	-0.311673	0.396765	0.0976807	0.0801373	-0.709673	-0.299937	-0.374831	-0.221586	-0.151043	0.286555	-0.480441	0.398383	-0.300952	0.121084	-0.163984	0.528499	-0.089055	-0.170226	0.167815	-0.187291	0.282723	-0.0279444	0.16457	M1 turquoise DNA Repair|0.8136
NFATC4|Q14934	turquoise	0.810482	-0.00729429	-0.38836	-0.156254	0.730585	0.562026	-0.493587	0.638828	-0.218637	0.433815	0.0639397	0.0882035	-0.621725	-0.400536	-0.332155	-0.201691	-0.0278817	0.483602	-0.355361	0.53974	-0.236147	0.25993	0.0933238	0.288421	-0.307327	-0.301868	0.0301504	-0.0791632	0.189179	-0.0683967	0.241302	M1 turquoise DNA Repair|0.8105
FBXL4|Q9UKA2	turquoise	0.810325	-0.0898713	-0.353711	-0.145058	0.394468	0.681068	-0.304368	0.691169	-0.427107	0.429856	0.150179	0.10568	-0.633309	-0.24087	-0.230807	-0.275015	-0.286808	0.273392	-0.478304	0.222097	-0.28849	0.158136	-0.276529	0.575579	-0.0723212	-0.144	0.197195	-0.182359	0.309881	-0.0958432	0.169983	M1 turquoise DNA Repair|0.8103
LMNB1|P20700	turquoise	0.809472	0.00490496	-0.217601	-0.232217	0.514862	0.586939	-0.109828	0.399306	-0.345721	0.292884	0.185641	-0.072614	-0.835203	-0.127191	-0.474297	-0.292603	-0.409547	0.068802	-0.546576	0.527348	-0.486136	0.154473	-0.262294	0.68931	-0.00176734	-0.095912	0.197617	-0.12377	0.155313	0.126205	0.107332	M1 turquoise DNA Repair|0.8095
MPL|P40238	turquoise	0.809081	-0.0699648	-0.329085	-0.155151	0.317476	0.533024	-0.293976	0.553736	-0.263809	0.351422	0.00987086	0.0764005	-0.702755	-0.262333	-0.45905	-0.213679	-0.306606	0.238071	-0.404635	0.37201	-0.300126	0.200177	-0.358458	0.552163	-0.0653942	-0.122354	0.221537	-0.0993902	0.187881	-0.0333964	0.183108	M1 turquoise DNA Repair|0.8091
SETD2|Q9BYW2	turquoise	0.808558	0.0454581	-0.217815	-0.215267	0.365628	0.475765	-0.278137	0.489283	-0.18791	0.381592	0.00922394	0.0396301	-0.66647	-0.209521	-0.434658	-0.177515	-0.280582	0.281092	-0.31426	0.508042	-0.301965	0.310488	-0.274007	0.459552	-0.160563	-0.153243	0.099876	-0.0705411	0.101942	0.102378	0.100171	M1 turquoise DNA Repair|0.8086
ARPP19|P56211	turquoise	0.805278	-0.0207417	-0.301913	-0.172691	0.432661	0.749892	-0.225316	0.561914	-0.496449	0.298512	0.257869	-0.031101	-0.748382	-0.194695	-0.272586	-0.32676	-0.327269	0.132641	-0.579382	0.227614	-0.461215	0.123231	-0.290853	0.60563	0.0123772	-0.126928	0.202116	-0.150436	0.231338	-0.035997	0.148155	M1 turquoise DNA Repair|0.8053
FCRL2|Q96LA5	turquoise	0.804105	-0.0108643	-0.227335	-0.19686	0.444277	0.637086	-0.197602	0.45323	-0.365563	0.322342	0.197631	-0.0074831	-0.767844	-0.155362	-0.402228	-0.258407	-0.358679	0.128319	-0.543925	0.436046	-0.411733	0.16256	-0.293238	0.611926	-0.0245455	-0.103028	0.149073	-0.11761	0.164804	0.0201543	0.122361	M1 turquoise DNA Repair|0.8041
SEMA3B|Q13214	turquoise	0.803879	-0.0575072	-0.343377	-0.153745	0.804106	0.628835	-0.397292	0.636714	-0.345304	0.394248	0.203612	0.0720485	-0.645474	-0.254625	-0.216373	-0.228487	-0.0826183	0.337315	-0.486136	0.488845	-0.283551	0.119026	0.136749	0.356951	-0.195315	-0.270421	0.0583647	-0.148735	0.27452	-0.0496242	0.197741	M1 turquoise DNA Repair|0.8039
DNAJC15|Q9Y5T4	turquoise	0.80234	-0.0316383	-0.327475	-0.159422	0.463479	0.68795	-0.373961	0.607061	-0.355106	0.446694	0.228537	0.117286	-0.652112	-0.330945	-0.261408	-0.30173	-0.315434	0.313079	-0.494101	0.381172	-0.30264	0.212819	-0.254952	0.509728	-0.166947	-0.263687	0.0869484	-0.107474	0.188556	-0.0264809	0.228938	M1 turquoise DNA Repair|0.8023
TMED4|Q7Z7H5	turquoise	0.80004	8.41e-05	-0.213449	-0.175675	0.409654	0.598914	-0.191033	0.464754	-0.327822	0.297197	0.161119	0.00940296	-0.712879	-0.140242	-0.334561	-0.112827	-0.323362	0.177826	-0.45622	0.394974	-0.354715	0.163115	-0.2599	0.52694	-0.0704808	-0.113837	0.103843	-0.112033	0.163124	0.129704	0.0708882	M1 turquoise DNA Repair|0.8
RETN|Q9HD89	turquoise	0.798133	0.0398893	-0.21426	-0.210852	0.781637	0.719954	-0.260856	0.509766	-0.445425	0.298015	0.336954	-0.0510087	-0.696433	-0.144543	-0.209495	-0.310172	-0.255759	0.208013	-0.535097	0.44628	-0.422363	0.113296	0.0707699	0.464373	-0.141985	-0.256478	0.0211678	-0.118294	0.220158	0.0589921	0.14537	M1 turquoise DNA Repair|0.7981
CEND1|Q8N111	turquoise	0.795735	-0.152755	-0.414091	-0.0493485	0.384709	0.618227	-0.384268	0.68205	-0.299914	0.472956	0.0945354	0.174413	-0.676746	-0.260322	-0.35912	-0.28354	-0.267405	0.231258	-0.504615	0.335542	-0.229155	0.135233	-0.321792	0.561117	-0.118895	-0.232372	0.130335	-0.223435	0.335328	-0.0827084	0.17735	M1 turquoise DNA Repair|0.7957
IL23A|Q9NPF7	turquoise	0.794994	-0.169341	-0.391715	-0.0895851	0.303289	0.68439	-0.344231	0.658813	-0.392431	0.47562	0.165544	0.179502	-0.622592	-0.244456	-0.237405	-0.351011	-0.363786	0.262016	-0.512504	0.201952	-0.240069	0.107005	-0.397733	0.59584	-0.0762759	-0.179492	0.171119	-0.224174	0.347221	-0.077248	0.154214	M1 turquoise DNA Repair|0.795
LTBP4|Q8N2S1	turquoise	0.791894	0.107947	-0.192506	-0.26072	0.612504	0.696614	-0.286021	0.403949	-0.356775	0.378	0.32919	0.027405	-0.690357	-0.182085	-0.232832	-0.186599	-0.401463	0.21529	-0.521398	0.526869	-0.406062	0.261986	-0.104254	0.488797	-0.229083	-0.208509	-0.0555991	-0.0809798	0.0561957	0.17222	0.0786022	M1 turquoise DNA Repair|0.7919
TG|P01266	turquoise	0.789844	0.0875825	-0.173521	-0.2926	0.523434	0.694252	-0.180326	0.45141	-0.472581	0.201797	0.264575	-0.114427	-0.65504	-0.176241	-0.213838	-0.136224	-0.295391	0.223692	-0.394961	0.345198	-0.464432	0.180125	-0.173289	0.445376	-0.138253	-0.162083	0.0762719	-0.0141897	0.111101	0.0108143	0.152854	M1 turquoise DNA Repair|0.7898
NR1D1|P20393	turquoise	0.788323	0.00706166	-0.281084	-0.244689	0.671934	0.757365	-0.237781	0.548851	-0.49982	0.274627	0.313028	-0.0812024	-0.69063	-0.190598	-0.159737	-0.265778	-0.270339	0.25172	-0.54521	0.280025	-0.460279	0.091893	0.0114936	0.46879	-0.0847145	-0.190463	0.113228	-0.12673	0.235805	-0.0249471	0.159893	M1 turquoise DNA Repair|0.7883
CCL25|O15444	turquoise	0.788054	-0.147545	-0.372846	-0.157924	0.350403	0.467431	-0.273298	0.493896	-0.172279	0.364388	-0.0172836	0.0618612	-0.763936	-0.171747	-0.541439	-0.252357	-0.270217	0.152477	-0.47334	0.511066	-0.325929	0.141311	-0.339291	0.604264	-0.017053	-0.048921	0.229842	-0.140784	0.201522	-0.00251229	0.133848	M1 turquoise DNA Repair|0.7881
RRBP1|Q9P2E9	turquoise	0.786927	-0.0286827	-0.383998	-0.118882	0.462999	0.71593	-0.457989	0.652854	-0.371645	0.497167	0.230612	0.202156	-0.593908	-0.43708	-0.168512	-0.277201	-0.259927	0.453996	-0.45541	0.296177	-0.195345	0.223517	-0.236525	0.437273	-0.253272	-0.334156	0.0351983	-0.176747	0.215986	-0.0480477	0.199323	M1 turquoise DNA Repair|0.7869
CAV3|P56539	turquoise	0.785519	-0.067025	-0.309109	-0.19586	0.463862	0.805352	-0.22636	0.550013	-0.55658	0.317017	0.369882	0.0235862	-0.693676	-0.186022	-0.145985	-0.403916	-0.378172	0.133975	-0.612513	0.193677	-0.40687	0.0422405	-0.285145	0.60869	-0.0191882	-0.149446	0.153528	-0.159835	0.265135	-0.0139987	0.169714	M1 turquoise DNA Repair|0.7855
FAM162B|Q5T6X4	turquoise	0.785306	0.237746	-0.121196	-0.34001	0.762157	0.713175	-0.267858	0.496688	-0.458736	0.235848	0.333301	-0.126494	-0.619373	-0.257979	-0.177046	-0.0202489	-0.160271	0.326686	-0.331567	0.452904	-0.447742	0.302689	0.0912318	0.326234	-0.251666	-0.294101	-0.0173677	0.0533936	0.0351537	0.0586294	0.187909	M1 turquoise DNA Repair|0.7853
POLE2|P56282	turquoise	0.784951	-0.00783769	-0.358336	-0.188841	0.553238	0.608921	-0.468923	0.756873	-0.373138	0.433824	0.101944	0.130138	-0.499763	-0.371281	-0.156765	-0.107454	-0.028626	0.461923	-0.299178	0.262609	-0.168257	0.265864	-0.0627736	0.319226	-0.268717	-0.291238	0.0544126	-0.11861	0.245203	-0.146235	0.253125	M1 turquoise DNA Repair|0.785
PCDHAC1|Q9H158	turquoise	0.78466	-0.224776	-0.449353	-0.0496134	0.48847	0.704232	-0.33787	0.605766	-0.420608	0.392902	0.231837	0.134462	-0.678266	-0.177435	-0.244184	-0.28109	-0.285169	0.199502	-0.603481	0.305181	-0.295475	-0.011779	-0.22314	0.542197	-0.101056	-0.177978	0.12245	-0.245592	0.439863	-0.0318675	0.184921	M1 turquoise DNA Repair|0.7847
CDK1|P06493	turquoise	0.783921	0.140783	-0.15376	-0.348631	0.557359	0.522946	-0.17474	0.337428	-0.245232	0.275997	0.146182	-0.0656087	-0.753763	-0.127254	-0.459177	-0.0505582	-0.332822	0.163006	-0.395355	0.625876	-0.428527	0.283515	-0.145827	0.551594	-0.153928	-0.121418	0.0454435	-0.0569073	0.0136083	0.0606962	0.0341713	M1 turquoise DNA Repair|0.7839
SMCO2|A6NFE2	turquoise	0.781083	-0.0671614	-0.388329	-0.168646	0.61223	0.678252	-0.42003	0.632766	-0.366961	0.365227	0.171005	0.0786277	-0.595997	-0.31422	-0.193507	-0.174233	-0.111181	0.358316	-0.447223	0.317463	-0.261362	0.145477	0.00539103	0.417382	-0.173151	-0.266689	0.109438	-0.134645	0.22738	-0.0277179	0.200873	M1 turquoise DNA Repair|0.7811
LECT2|O14960	turquoise	0.780469	-0.0682074	-0.368663	-0.121491	0.76492	0.74053	-0.379831	0.609159	-0.466772	0.374637	0.323216	0.0552408	-0.673709	-0.259097	-0.187398	-0.353056	-0.11651	0.282656	-0.569715	0.39448	-0.36058	0.058585	0.0558504	0.393334	-0.167534	-0.333547	0.0714176	-0.171664	0.291393	-0.0500605	0.182486	M1 turquoise DNA Repair|0.7805
IFNGR2|P38484	turquoise	0.778004	0.164541	-0.0938476	-0.265191	0.378585	0.549641	-0.158948	0.321605	-0.176839	0.24354	0.111088	-0.10907	-0.75963	-0.123321	-0.503021	-0.132306	-0.409676	0.13234	-0.361121	0.593461	-0.475855	0.323032	-0.359988	0.515339	-0.143247	-0.150892	-0.00328435	0.0522327	-0.0385982	0.134661	0.0809138	M1 turquoise DNA Repair|0.778
NPPB|P16860	turquoise	0.777574	0.0537393	-0.227249	-0.224234	0.790412	0.611376	-0.214581	0.45046	-0.387556	0.241993	0.222999	-0.0991891	-0.732051	-0.150377	-0.318758	-0.253704	-0.176002	0.205267	-0.488859	0.529893	-0.462063	0.12706	0.0930251	0.406545	-0.135733	-0.175986	0.0669281	-0.0848095	0.150639	-0.0187786	0.137485	M1 turquoise DNA Repair|0.7776
KIF16B|Q96L93	turquoise	0.777295	-0.042097	-0.389543	-0.232836	0.783048	0.66337	-0.369507	0.626073	-0.391496	0.377507	0.279765	0.00713864	-0.640555	-0.338515	-0.14814	-0.243357	-0.139501	0.374088	-0.499322	0.386597	-0.35003	0.145636	0.183713	0.448457	-0.123696	-0.274874	0.15649	-0.223667	0.257202	0.027451	0.148491	M1 turquoise DNA Repair|0.7773
LETMD1|Q6P1Q0	turquoise	0.777016	-0.0500917	-0.296767	-0.116747	0.298897	0.673277	-0.337986	0.722914	-0.456206	0.427695	0.17053	0.110786	-0.551654	-0.276669	-0.186116	-0.23986	-0.2724	0.272889	-0.3925	0.14446	-0.252771	0.172987	-0.39034	0.5087	-0.103899	-0.254618	0.146223	-0.157631	0.289451	-0.0760969	0.15294	M1 turquoise DNA Repair|0.777
CSAG1|Q6PB30	turquoise	0.776898	-0.102435	-0.435295	-0.115979	0.426673	0.433916	-0.478917	0.67141	-0.138275	0.472483	-0.0850058	0.159736	-0.594125	-0.417493	-0.44857	-0.125741	-0.0508707	0.399067	-0.289068	0.477531	-0.158679	0.279524	-0.17373	0.36798	-0.215183	-0.276985	0.155408	-0.0720485	0.196851	-0.119558	0.245485	M1 turquoise DNA Repair|0.7769
CHD7|Q9P2D1	turquoise	0.776419	0.0558536	-0.210967	-0.230382	0.274914	0.505146	-0.266436	0.500517	-0.181406	0.394539	0.0405808	0.0209145	-0.627353	-0.265296	-0.366398	-0.103306	-0.387102	0.304987	-0.312317	0.451321	-0.321415	0.35512	-0.352897	0.512084	-0.167214	-0.212129	0.0911324	-0.0285141	0.0556791	0.272669	0.157799	M1 turquoise DNA Repair|0.7764
C1QTNF9|P0C862	turquoise	0.774327	-0.0368313	-0.363757	-0.232895	0.777095	0.580424	-0.353307	0.467408	-0.276287	0.388417	0.230912	0.0441143	-0.722688	-0.23187	-0.325799	-0.285117	-0.179814	0.25851	-0.556812	0.595314	-0.368488	0.142276	0.0956345	0.461992	-0.192035	-0.242512	0.022959	-0.227918	0.176124	0.0271109	0.0848869	M1 turquoise DNA Repair|0.7743
PIM1|P11309	turquoise	0.772942	0.00564703	-0.216449	-0.0783025	0.716621	0.65828	-0.289052	0.495528	-0.362446	0.338211	0.265309	0.00390619	-0.640861	-0.16549	-0.245085	-0.225614	-0.204928	0.238045	-0.468022	0.471747	-0.352552	0.124634	0.0251436	0.388311	-0.237431	-0.306595	-0.071952	-0.105139	0.216118	0.0675566	0.134045	M1 turquoise DNA Repair|0.7729
MAP4K3|Q8IVH8	turquoise	0.772701	0.104733	-0.127674	-0.226621	0.427728	0.714579	-0.158807	0.504165	-0.475223	0.307895	0.298767	-0.0627367	-0.666588	-0.133763	-0.196437	-0.242413	-0.433669	0.156896	-0.488675	0.269836	-0.421592	0.224979	-0.297002	0.573278	-0.0916603	-0.150238	0.0967173	-0.0842673	0.14044	0.0763837	0.107121	M1 turquoise DNA Repair|0.7727
TBK1|Q9UHD2	turquoise	0.772705	0.0374184	-0.184898	-0.255753	0.334887	0.691174	-0.119529	0.434358	-0.451699	0.239222	0.228189	-0.0764384	-0.715804	-0.116932	-0.312397	-0.248531	-0.429525	0.0681848	-0.480185	0.253929	-0.462543	0.175265	-0.360152	0.615862	0.0319619	-0.0752832	0.190769	-0.0826352	0.117759	0.00789963	0.117275	M1 turquoise DNA Repair|0.7727
FYN|P06241	turquoise	0.771564	-0.07434	-0.309632	-0.232059	0.297652	0.504644	-0.146114	0.463537	-0.238798	0.231219	-0.025476	-0.0656682	-0.786402	-0.12628	-0.565486	-0.208296	-0.31135	0.123399	-0.433455	0.3879	-0.417587	0.115143	-0.389289	0.674076	0.0744805	0.0539926	0.306984	-0.141413	0.211972	-0.00446654	0.0879658	M1 turquoise DNA Repair|0.7716
SEC61G|P60059	turquoise	0.769899	-0.0393446	-0.268465	-0.139043	0.417236	0.765193	-0.2639	0.633144	-0.557598	0.391942	0.29919	0.0964706	-0.612993	-0.18118	-0.109198	-0.290977	-0.316543	0.202847	-0.527335	0.0989092	-0.318148	0.109453	-0.25047	0.556555	-0.0446698	-0.189198	0.128185	-0.159534	0.27976	-0.0391605	0.16447	M1 turquoise DNA Repair|0.7699
IFNL2|Q8IZJ0	turquoise	0.769643	-0.14264	-0.378964	-0.170662	0.419376	0.734317	-0.287286	0.595935	-0.473527	0.368247	0.259666	0.0846812	-0.645801	-0.263632	-0.165425	-0.287618	-0.336089	0.232065	-0.552402	0.180769	-0.328908	0.0812813	-0.248391	0.529145	-0.0404397	-0.146028	0.233114	-0.175235	0.273169	-0.0233576	0.229577	M1 turquoise DNA Repair|0.7696
CCL27|Q9Y4X3	turquoise	0.768742	-0.046257	-0.263645	-0.207802	0.568789	0.526182	-0.189636	0.474324	-0.25202	0.304319	0.10094	-0.0446761	-0.758656	-0.166165	-0.459628	-0.296331	-0.252259	0.162816	-0.47664	0.492847	-0.383796	0.13833	-0.0994914	0.58767	-0.0356716	-0.132126	0.184412	-0.117634	0.183666	0.033738	0.156409	M1 turquoise DNA Repair|0.7687
PLK1|P53350	turquoise	0.767757	0.127217	-0.075987	-0.259578	0.302662	0.632321	-0.13651	0.574859	-0.427477	0.386829	0.268017	0.0139379	-0.631499	-0.116994	-0.179294	-0.263997	-0.454496	0.11265	-0.437991	0.25033	-0.358604	0.236343	-0.416258	0.593129	-0.0108836	-0.117218	0.0949018	-0.00783174	0.106861	0.0957597	0.199074	M1 turquoise DNA Repair|0.7678
SEMA6C|Q9H3T2	turquoise	0.765383	-0.0470448	-0.371222	-0.156113	0.536654	0.375467	-0.41269	0.610613	-0.0677634	0.329859	-0.166509	0.0445692	-0.616165	-0.333995	-0.500789	-0.1651	0.0268006	0.431771	-0.230451	0.525152	-0.205428	0.229461	-0.0448566	0.282868	-0.188821	-0.209648	0.164992	-0.0570059	0.226493	-0.101448	0.206606	M1 turquoise DNA Repair|0.7654
GPR107|Q5VW38	turquoise	0.762727	-0.0448322	-0.22393	-0.139951	0.407556	0.510085	-0.15922	0.342537	-0.184461	0.277721	0.0999897	-0.0451618	-0.7761	-0.0486722	-0.525334	-0.19754	-0.377116	0.0764251	-0.509971	0.601565	-0.427388	0.0983	-0.332063	0.609111	-0.0584982	-0.0701788	0.079058	-0.122014	0.178759	-0.0124126	0.0444783	M1 turquoise DNA Repair|0.7627
SHC4|Q6S5L8	turquoise	0.760308	-0.187776	-0.535908	-0.0640923	0.436602	0.360694	-0.492635	0.667203	0.0481741	0.436061	-0.210694	0.170331	-0.691898	-0.426188	-0.599382	-0.236865	-0.00716436	0.399867	-0.341666	0.56308	-0.144261	0.214154	-0.121161	0.446378	-0.137276	-0.214514	0.224066	-0.215761	0.264554	-0.0801806	0.169016	M1 turquoise DNA Repair|0.7603
PC|P11498	turquoise	0.759491	0.0942066	-0.218205	-0.204991	0.354633	0.596579	-0.284568	0.602774	-0.341543	0.311965	0.0993207	0.0145488	-0.59506	-0.268183	-0.239675	-0.0885724	-0.195652	0.258778	-0.3202	0.218234	-0.287597	0.269006	-0.259682	0.483036	-0.0833182	-0.180183	0.136191	-0.0768858	0.138808	0.0560557	0.136688	M1 turquoise DNA Repair|0.7595
DEFB115|Q30KQ5	turquoise	0.758163	-0.0569777	-0.323189	-0.162596	0.575851	0.516435	-0.328178	0.523973	-0.239038	0.405752	0.125953	0.0980676	-0.623376	-0.287229	-0.296314	-0.116007	-0.241758	0.317866	-0.40975	0.501159	-0.270909	0.199063	-0.0412461	0.501795	-0.165882	-0.257707	0.0826022	-0.142998	0.192887	0.10919	0.157299	M1 turquoise DNA Repair|0.7582
OLFM4|Q6UX06	turquoise	0.753749	-0.0568799	-0.338605	-0.178122	0.22734	0.439694	-0.368917	0.550801	-0.0887046	0.456227	-0.0771875	0.173685	-0.625595	-0.290232	-0.454027	-0.168578	-0.292664	0.296498	-0.326217	0.413536	-0.163803	0.297872	-0.339744	0.521953	-0.151608	-0.149437	0.12241	-0.118708	0.119163	0.100529	0.133743	M1 turquoise DNA Repair|0.7537
B3GNT6|Q6ZMB0	turquoise	0.752872	-0.0939	-0.41356	-0.142206	0.756969	0.41762	-0.453375	0.602454	-0.0721051	0.421222	-0.0239336	0.083243	-0.630907	-0.323193	-0.385872	-0.192934	0.0011425	0.413802	-0.366148	0.630469	-0.205854	0.217426	0.201818	0.332411	-0.257771	-0.275428	0.0711238	-0.1511	0.221752	0.0559097	0.205123	M1 turquoise DNA Repair|0.7529
ADAM32|Q8TC27	turquoise	0.7525	-0.112962	-0.374722	-0.114052	0.354001	0.669594	-0.38811	0.699901	-0.430465	0.425493	0.147647	0.147172	-0.56541	-0.279249	-0.217473	-0.355198	-0.175235	0.288893	-0.436634	0.133451	-0.216002	0.12687	-0.253964	0.449989	-0.129774	-0.222329	0.145141	-0.201949	0.301985	-0.104971	0.16491	M1 turquoise DNA Repair|0.7525
C1orf63|Q9BUV0	turquoise	0.752465	-0.0336912	-0.355144	-0.165284	0.446898	0.414965	-0.384792	0.559808	-0.100744	0.355873	-0.0559735	0.0903437	-0.586573	-0.388446	-0.404452	-0.0538052	-0.149549	0.386354	-0.234839	0.540775	-0.195056	0.261138	-0.0981624	0.36687	-0.259173	-0.279173	0.135057	-0.0985873	0.140683	0.0519395	0.14493	M1 turquoise DNA Repair|0.7525
EPS15L1|Q9UBC2	turquoise	0.751766	0.1045	-0.109366	-0.320772	0.352682	0.569426	-0.0904342	0.562407	-0.396901	0.31208	0.248973	-0.0948623	-0.662459	-0.156189	-0.257043	-0.215941	-0.420116	0.126669	-0.430545	0.297083	-0.424865	0.260312	-0.31502	0.695683	0.00138775	-0.114247	0.180501	-0.114373	0.111117	0.104393	0.121001	M1 turquoise DNA Repair|0.7518
NTF4|P34130	turquoise	0.751552	0.0458594	-0.224841	-0.269955	0.432974	0.563979	-0.277333	0.514053	-0.37792	0.306289	0.146057	0.051958	-0.573995	-0.215182	-0.240219	-0.000112109	-0.156208	0.24288	-0.331682	0.323002	-0.267918	0.22024	-0.162584	0.406829	-0.138791	-0.133698	0.0923345	-0.0324741	0.106958	0.0227299	0.18818	M1 turquoise DNA Repair|0.7516
CTCF|P49711	turquoise	0.751468	0.0703593	-0.17396	-0.236662	0.681858	0.69513	-0.283797	0.578579	-0.49366	0.299267	0.278631	-0.0492299	-0.559833	-0.197343	-0.130754	-0.232831	-0.111462	0.297442	-0.377327	0.295952	-0.363023	0.166519	0.0595751	0.347742	-0.156837	-0.204878	0.0812349	-0.0695285	0.194895	0.0454303	0.172019	M1 turquoise DNA Repair|0.7515
RNASE10|Q5GAN6	turquoise	0.750689	0.162273	-0.147197	-0.326892	0.737164	0.656251	-0.204958	0.364065	-0.342938	0.157178	0.265937	-0.154384	-0.691878	-0.147652	-0.265736	-0.120723	-0.263856	0.222933	-0.428068	0.515771	-0.495568	0.193491	0.0750069	0.398515	-0.171434	-0.122796	-0.0379083	-0.054293	0.0455273	0.141395	0.0632264	M1 turquoise DNA Repair|0.7507
PRRG1|O14668	turquoise	0.750586	-0.0852879	-0.382439	-0.228606	0.513385	0.490726	-0.456202	0.487627	-0.0694538	0.545766	0.0277249	0.232167	-0.634251	-0.183224	-0.392242	-0.172064	-0.19964	0.314516	-0.425399	0.621888	-0.164067	0.186003	-0.11386	0.426372	-0.247035	-0.182911	-0.0584677	-0.178203	0.169478	0.0736616	0.101237	M1 turquoise DNA Repair|0.7506
SIGLEC6|O43699	turquoise	0.747601	-0.149507	-0.417594	-0.125283	0.379105	0.348629	-0.347058	0.509037	-0.0398193	0.420739	-0.132542	0.10927	-0.673592	-0.268914	-0.589054	-0.182995	-0.229072	0.285368	-0.326901	0.617729	-0.251264	0.211882	-0.260146	0.458113	-0.145638	-0.160456	0.175716	-0.188315	0.212783	-0.0779343	0.0937673	M1 turquoise DNA Repair|0.7476
KIR3DL3|Q8N743	turquoise	0.746797	-0.0175154	-0.183636	-0.141032	0.568827	0.553837	-0.179184	0.367073	-0.270243	0.305646	0.229086	-0.025124	-0.729676	-0.0966204	-0.386297	-0.251079	-0.343534	0.0858501	-0.526427	0.606974	-0.420806	0.123478	-0.176758	0.502356	-0.125056	-0.142572	-0.0165497	-0.0412721	0.126894	0.0524311	0.162768	M1 turquoise DNA Repair|0.7468
EFNB2|P52799	turquoise	0.745658	0.0253681	-0.191382	-0.186888	0.575928	0.56789	-0.227015	0.438037	-0.283371	0.313592	0.199148	-0.0339102	-0.661544	-0.158745	-0.315569	-0.171241	-0.253649	0.211015	-0.418106	0.524812	-0.374549	0.162593	-0.129311	0.434291	-0.170453	-0.260902	-0.014789	-0.0373702	0.134066	0.0922854	0.192631	M1 turquoise DNA Repair|0.7457
MEF2C|Q06413	turquoise	0.745646	-0.0490174	-0.355518	-0.224575	0.606631	0.644778	-0.330473	0.652445	-0.419331	0.286909	0.149288	-0.0146313	-0.593847	-0.284581	-0.233614	-0.21896	-0.0413698	0.32017	-0.388442	0.273234	-0.339908	0.0836973	-0.0340156	0.366234	-0.0804832	-0.212884	0.200728	-0.107747	0.27337	-0.150712	0.210844	M1 turquoise DNA Repair|0.7456
LRRTM1|Q86UE6	turquoise	0.743593	0.0766186	-0.149297	-0.225115	0.434658	0.73082	-0.214019	0.506233	-0.514728	0.425809	0.405508	0.0836247	-0.604938	-0.136713	-0.0791454	-0.194168	-0.501387	0.111877	-0.521323	0.305456	-0.356669	0.212927	-0.296895	0.55118	-0.146424	-0.222528	-0.038896	-0.117266	0.131843	0.0686379	0.113352	M1 turquoise DNA Repair|0.7436
FMR1|Q06787	turquoise	0.742375	-0.0458684	-0.274949	-0.147458	0.292286	0.557177	-0.138951	0.459443	-0.341321	0.218053	0.0791831	-0.0852	-0.722791	-0.161965	-0.434688	-0.28582	-0.329247	0.125951	-0.437501	0.279765	-0.440404	0.143398	-0.364038	0.615238	0.0757941	-0.083828	0.274389	-0.126338	0.220334	-0.0651401	0.105764	M1 turquoise DNA Repair|0.7424
CLEC2B|Q92478	turquoise	0.741773	-0.0762423	-0.425911	-0.14093	0.647651	0.384231	-0.563368	0.565282	-0.0077283	0.602433	-0.0343471	0.285136	-0.587636	-0.360648	-0.371814	-0.113248	-0.0163265	0.433522	-0.384138	0.674052	-0.0704242	0.279864	0.0849998	0.306857	-0.301081	-0.271522	-0.0420815	-0.138949	0.134635	0.0537108	0.205584	M1 turquoise DNA Repair|0.7418
DEFB129|Q9H1M3	turquoise	0.741817	0.0376936	-0.25156	-0.238262	0.565291	0.699416	-0.311942	0.508993	-0.4836	0.283095	0.25266	-0.0102542	-0.603505	-0.241105	-0.167943	-0.244968	-0.190817	0.297768	-0.435843	0.228123	-0.363347	0.155456	-0.0855273	0.365707	-0.170273	-0.197848	0.0767671	-0.0542269	0.177518	-0.115751	0.195005	M1 turquoise DNA Repair|0.7418
FGF4|P08620	turquoise	0.741521	-0.0763109	-0.287795	-0.2614	0.292455	0.441261	-0.223232	0.438825	-0.207408	0.27912	-0.0135586	-0.00249721	-0.693461	-0.148819	-0.519601	-0.195612	-0.277006	0.146924	-0.372801	0.406727	-0.343814	0.171842	-0.351336	0.566759	0.012481	-0.0399459	0.231269	-0.0737553	0.158539	-0.0344601	0.198808	M1 turquoise DNA Repair|0.7415
TMEM154|Q6P9G4	turquoise	0.740959	0.0128924	-0.152828	-0.207714	0.264971	0.502114	-0.143586	0.447827	-0.249384	0.335495	0.0866357	-0.0336583	-0.69273	-0.0823633	-0.460963	-0.136932	-0.411923	0.0704429	-0.43562	0.438532	-0.412395	0.202396	-0.440203	0.617793	-0.0309223	-0.111932	0.10963	-0.0502366	0.138752	0.0468317	0.113179	M1 turquoise DNA Repair|0.741
PROL1|Q99935	turquoise	0.738341	-0.0707468	-0.294176	-0.16383	0.509462	0.557749	-0.294032	0.523699	-0.331768	0.352109	0.133176	0.0418653	-0.58954	-0.191304	-0.299748	-0.237886	-0.162282	0.255788	-0.393053	0.396547	-0.293517	0.124675	-0.0941532	0.392425	-0.0964305	-0.199191	0.138182	-0.155236	0.228128	-0.0546852	0.104763	M1 turquoise DNA Repair|0.7383
OBP2A|Q9NY56	turquoise	0.737311	0.0599563	-0.210907	-0.249795	0.651108	0.635012	-0.263507	0.560268	-0.443661	0.258905	0.213029	-0.0713401	-0.572325	-0.233056	-0.210753	-0.212413	-0.10298	0.314112	-0.338895	0.278568	-0.352874	0.200588	0.0675696	0.421151	-0.134621	-0.15499	0.119989	-0.0924633	0.185236	0.0127117	0.13201	M1 turquoise DNA Repair|0.7373
SPEF1|Q9Y4P9	turquoise	0.73672	-0.118225	-0.407404	-0.0580492	0.31144	0.343211	-0.401205	0.605759	-0.0444835	0.369093	-0.232436	0.0912307	-0.577282	-0.343045	-0.508628	-0.126326	-0.0670261	0.409863	-0.236354	0.398934	-0.162632	0.256274	-0.193757	0.354973	-0.194274	-0.158478	0.203317	-0.135828	0.23505	-0.0785351	0.134904	M1 turquoise DNA Repair|0.7367
GDNF|P39905	turquoise	0.735988	-0.0424114	-0.39229	-0.144445	0.481723	0.432437	-0.464795	0.544829	-0.0818113	0.482861	-0.0119359	0.158049	-0.579277	-0.394983	-0.383795	-0.132965	-0.171004	0.439353	-0.321006	0.554989	-0.186903	0.311838	-0.106767	0.346862	-0.289374	-0.307473	0.040469	-0.0645341	0.104294	-0.0494675	0.252667	M1 turquoise DNA Repair|0.736
RAG1|P15918	turquoise	0.735942	-0.02118	-0.317257	-0.20032	0.70273	0.486135	-0.32705	0.513692	-0.237131	0.309279	0.102282	0.0278661	-0.618163	-0.259169	-0.308567	-0.118952	-0.0882028	0.33073	-0.377024	0.545655	-0.283493	0.171076	0.120726	0.296867	-0.198402	-0.20667	0.10028	-0.100596	0.194266	0.00190031	0.146035	M1 turquoise DNA Repair|0.7359
CDK2|P24941	turquoise	0.735432	-0.0427935	-0.344702	-0.143293	0.296279	0.405237	-0.336062	0.597705	-0.114112	0.482132	-0.0386703	0.122704	-0.653412	-0.308918	-0.444774	-0.150619	-0.234169	0.292923	-0.368924	0.454401	-0.222672	0.308156	-0.354522	0.533696	-0.149758	-0.240425	0.119322	-0.188556	0.172865	0.0303715	0.114031	M1 turquoise DNA Repair|0.7354
SLC26A5|P58743	turquoise	0.734847	-0.0429514	-0.24241	-0.162825	0.370662	0.58978	-0.234929	0.610254	-0.362314	0.367531	0.146383	0.0233119	-0.609745	-0.151605	-0.262115	-0.272725	-0.274722	0.18848	-0.428266	0.298454	-0.333759	0.128985	-0.289523	0.483837	-0.0556206	-0.154521	0.122222	-0.0900658	0.249663	-0.0505411	0.178259	M1 turquoise DNA Repair|0.7348
IGSF9|Q9P2J2	turquoise	0.734714	-0.0956825	-0.338854	-0.124857	0.512593	0.62471	-0.333337	0.615089	-0.411684	0.282929	0.15116	0.0436721	-0.577411	-0.255629	-0.228282	-0.293995	-0.130555	0.288945	-0.391891	0.244611	-0.283389	0.0867905	-0.0781516	0.376029	-0.110079	-0.19803	0.168857	-0.0986007	0.281279	-0.136239	0.247659	M1 turquoise DNA Repair|0.7347
UTS2R|Q9UKP6	turquoise	0.734556	-0.0772334	-0.337811	-0.174738	0.744584	0.637024	-0.298325	0.534194	-0.424399	0.279667	0.243296	-0.0203986	-0.654167	-0.228346	-0.267854	-0.253817	-0.0806473	0.263612	-0.511107	0.38264	-0.37906	0.0191995	0.0713374	0.390809	-0.105598	-0.175742	0.131267	-0.177289	0.2875	-0.0862305	0.160424	M1 turquoise DNA Repair|0.7346
EGFR|P00533	turquoise	0.734282	-0.198991	-0.426161	-0.0967281	0.419246	0.305688	-0.350098	0.583293	0.0116984	0.426113	-0.190102	0.140687	-0.68771	-0.264644	-0.570604	-0.236607	-0.0896498	0.268355	-0.373051	0.568199	-0.162086	0.155427	-0.147875	0.511063	-0.0396606	-0.0782703	0.276106	-0.191041	0.290602	-0.00220021	0.1777	M1 turquoise DNA Repair|0.7343
PAX4|O43316	turquoise	0.733897	-0.0176728	-0.346178	-0.216601	0.717511	0.505818	-0.32343	0.54448	-0.257234	0.28306	0.0909742	-0.0549883	-0.638277	-0.330895	-0.356637	-0.216593	-0.100265	0.336336	-0.340214	0.48249	-0.343616	0.22482	0.115997	0.395466	-0.162258	-0.243463	0.145095	-0.170489	0.207869	-0.0584875	0.139532	M1 turquoise DNA Repair|0.7339
CCNA2|P20248	turquoise	0.731934	-0.0466762	-0.345468	-0.141032	0.29229	0.402406	-0.337329	0.599518	-0.114819	0.483434	-0.0394258	0.125179	-0.648912	-0.310042	-0.445069	-0.154052	-0.229529	0.292711	-0.366385	0.450309	-0.219488	0.304345	-0.357569	0.531318	-0.148604	-0.241738	0.121192	-0.188736	0.176237	0.0267645	0.116432	M1 turquoise DNA Repair|0.7319
JPH4|Q96JJ6	turquoise	0.730493	0.176084	-0.147772	-0.292177	0.695141	0.722938	-0.263638	0.461939	-0.449141	0.213249	0.353526	-0.110021	-0.602403	-0.232442	-0.104864	-0.110662	-0.20016	0.284502	-0.411782	0.391343	-0.447374	0.212178	0.0330103	0.285654	-0.193563	-0.231106	-0.00593631	0.0486972	0.0296952	0.0945543	0.201479	M1 turquoise DNA Repair|0.7305
C16orf54|Q6UWD8	turquoise	0.729275	-0.0389508	-0.27764	-0.115516	0.460795	0.529313	-0.203665	0.452518	-0.280089	0.326486	0.135208	-0.0181057	-0.640406	-0.183796	-0.367653	-0.216161	-0.271585	0.242472	-0.415667	0.444782	-0.358198	0.162865	-0.155554	0.450732	-0.111262	-0.108466	0.12627	-0.240256	0.245388	0.0143572	-0.0278381	M1 turquoise DNA Repair|0.7293
AMN|Q9BXJ7	turquoise	0.728426	-0.00169637	-0.237726	-0.120494	0.26328	0.559195	-0.309747	0.676247	-0.339135	0.450589	0.124275	0.158308	-0.544266	-0.249073	-0.237315	-0.240854	-0.252196	0.250621	-0.371473	0.209964	-0.182168	0.228699	-0.37587	0.492065	-0.128238	-0.223272	0.0953672	-0.150939	0.23224	-0.0170033	0.174603	M1 turquoise DNA Repair|0.7284
PES1|O00541	turquoise	0.72718	-0.0140225	-0.182534	-0.23664	0.40628	0.54571	-0.0592729	0.420047	-0.350208	0.246354	0.180738	-0.0758272	-0.750551	-0.0512273	-0.427752	-0.348714	-0.33711	0.0316324	-0.49874	0.408169	-0.439835	0.0948908	-0.316408	0.708036	0.0928565	-0.0440733	0.222337	-0.122696	0.219067	0.061387	0.105569	M1 turquoise DNA Repair|0.7272
PON1|P27169	turquoise	0.726653	-0.0529155	-0.343633	-0.162169	0.264468	0.358877	-0.304136	0.501853	-0.0869177	0.37245	-0.104737	0.0686336	-0.611744	-0.331931	-0.496746	-0.118222	-0.220583	0.337207	-0.269507	0.439651	-0.234782	0.323047	-0.253728	0.435165	-0.156124	-0.223729	0.189403	-0.157897	0.121897	-0.0332081	0.105265	M1 turquoise DNA Repair|0.7267
MBD4|O95243	turquoise	0.726283	-0.100043	-0.257611	-0.117012	0.344383	0.510045	-0.119945	0.506941	-0.299231	0.378871	0.16115	0.0406463	-0.717593	-0.0989136	-0.375041	-0.341583	-0.409051	0.0394599	-0.55353	0.379784	-0.345402	0.0931459	-0.352641	0.736888	0.0418778	-0.0492239	0.215711	-0.236503	0.271381	0.0287725	0.0513845	M1 turquoise DNA Repair|0.7263
MGA|Q8IWI9	turquoise	0.723181	0.0240556	-0.406956	-0.264107	0.645001	0.409318	-0.563643	0.55753	-0.0404513	0.467291	-0.0447806	0.159636	-0.551509	-0.421606	-0.364502	0.0284902	0.0182664	0.520618	-0.25685	0.616881	-0.137954	0.359524	0.130551	0.23187	-0.379018	-0.347355	-0.0369655	-0.0368169	0.0654398	0.0294533	0.228133	M1 turquoise DNA Repair|0.7232
DHX58|Q96C10	turquoise	0.720951	-0.20117	-0.560859	0.0160324	0.531356	0.508094	-0.534454	0.68186	-0.202628	0.462116	-0.0342374	0.197045	-0.537784	-0.471179	-0.31235	-0.299994	0.0193366	0.490335	-0.349142	0.341996	-0.133756	0.145899	-0.0406556	0.298743	-0.186059	-0.317862	0.161968	-0.31864	0.30395	-0.204481	0.0689612	M1 turquoise DNA Repair|0.721
BNIP3L|O60238	turquoise	0.720832	-0.062385	-0.317519	-0.164491	0.297226	0.511131	-0.342719	0.736398	-0.330664	0.552316	0.0946319	0.16129	-0.523595	-0.357661	-0.199103	-0.254564	-0.234264	0.333547	-0.351867	0.198014	-0.164998	0.276318	-0.275316	0.569051	-0.0504533	-0.234769	0.21267	-0.137356	0.241261	0.0465706	0.259024	M1 turquoise DNA Repair|0.7208
DGCR2|P98153	turquoise	0.720268	0.153844	-0.185811	-0.349395	0.644565	0.672741	-0.339677	0.563192	-0.452981	0.322212	0.318093	-0.0160496	-0.526874	-0.245391	-0.0666123	0.0110593	-0.156324	0.336012	-0.379609	0.322076	-0.349439	0.259899	0.0259699	0.308766	-0.251449	-0.266061	-0.0335511	-0.0209876	0.0708446	-0.0142647	0.21323	M1 turquoise DNA Repair|0.7203
HMG20B|Q9P0W2	turquoise	0.720137	0.0232596	-0.104677	-0.155216	0.309518	0.706581	-0.10875	0.526212	-0.554199	0.410926	0.446188	0.0844829	-0.609252	-0.017507	-0.0231287	-0.233374	-0.513082	0.0220044	-0.622513	0.175165	-0.337348	0.0740073	-0.379206	0.683269	0.0250866	-0.0635458	0.0389796	-0.236694	0.233874	0.0897675	0.02249	M1 turquoise DNA Repair|0.7201
HMOX2|P30519	turquoise	0.719947	-0.152605	-0.320558	-0.112193	0.273885	0.558777	-0.254471	0.745115	-0.418214	0.523006	0.190341	0.188185	-0.548704	-0.237841	-0.148216	-0.307936	-0.302056	0.222752	-0.485438	0.108577	-0.174647	0.110738	-0.349974	0.68849	0.0480894	-0.113367	0.253843	-0.276706	0.351283	-0.0234554	0.157707	M1 turquoise DNA Repair|0.7199
BATF3|Q9NR55	turquoise	0.719242	0.00942105	-0.269486	-0.135423	0.685881	0.610607	-0.343028	0.597676	-0.391639	0.271774	0.176305	-0.0448194	-0.528679	-0.278597	-0.15801	-0.217412	-0.0269233	0.389681	-0.325355	0.313428	-0.308381	0.140276	0.107906	0.248288	-0.198418	-0.296625	0.0954805	-0.0369645	0.271303	-0.121073	0.228615	M1 turquoise DNA Repair|0.7192
DEFB107A|Q8IZN7	turquoise	0.719117	0.0635858	-0.110927	-0.319164	0.525644	0.728388	-0.0758612	0.285444	-0.498295	0.16932	0.391099	-0.126771	-0.733697	0.013194	-0.231078	-0.225353	-0.419139	-0.0264585	-0.595759	0.364985	-0.540968	0.0283823	-0.21077	0.573179	0.0334639	0.00302128	0.0615986	-0.0317126	0.120518	0.0521558	0.105907	M1 turquoise DNA Repair|0.7191
IL12RB1|P42701	turquoise	0.718927	0.121854	-0.15174	-0.276613	0.688594	0.543338	-0.26432	0.453071	-0.335961	0.270839	0.219137	-0.0520665	-0.592256	-0.190121	-0.232029	-0.0698748	-0.112819	0.277185	-0.314901	0.486917	-0.368496	0.240785	0.112677	0.333691	-0.26859	-0.30484	-0.0341569	0.012137	0.0939648	0.0833573	0.190984	M1 turquoise DNA Repair|0.7189
GREM1|O60565	turquoise	0.717962	-0.0587306	-0.248694	-0.237177	0.388049	0.46369	-0.180206	0.488475	-0.279198	0.344244	0.134307	-0.00141745	-0.686393	-0.122996	-0.371988	-0.182538	-0.347526	0.121783	-0.489499	0.389029	-0.35239	0.122764	-0.267676	0.639234	-0.0290958	-0.0467709	0.132277	-0.166305	0.20669	-0.0100241	0.147373	M1 turquoise DNA Repair|0.718
FAM172A|Q8WUF8	turquoise	0.716356	0.00857547	-0.310022	-0.178226	0.722635	0.521944	-0.322622	0.513568	-0.27002	0.250483	0.116665	-0.00022045	-0.628119	-0.252712	-0.28801	-0.183648	-0.021105	0.310934	-0.386458	0.50113	-0.299181	0.1721	0.154227	0.283037	-0.16919	-0.193568	0.101453	-0.0721736	0.178093	-0.103434	0.179117	M1 turquoise DNA Repair|0.7164
COLQ|Q9Y215	turquoise	0.712453	-0.12479	-0.384227	-0.0125204	0.189	0.4794	-0.293469	0.625464	-0.233746	0.415567	-0.0403017	0.0913699	-0.629435	-0.332092	-0.418708	-0.300775	-0.282459	0.227989	-0.375926	0.233081	-0.246564	0.212126	-0.47191	0.566233	-0.00350649	-0.179023	0.259089	-0.21198	0.273726	-0.0893025	0.1157	M1 turquoise DNA Repair|0.7125
TENM2|Q9NT68	turquoise	0.712511	0.150105	-0.225615	-0.188039	0.6453	0.616633	-0.262452	0.400093	-0.281822	0.261132	0.243104	-0.0802686	-0.648359	-0.325044	-0.212677	-0.0203109	-0.258886	0.368943	-0.397575	0.49605	-0.420802	0.297996	0.0178529	0.393847	-0.304415	-0.376549	-0.0658826	-0.0347501	0.029267	0.130263	0.157086	M1 turquoise DNA Repair|0.7125
ITGAL|P20701	turquoise	0.712256	0.0792113	-0.254098	-0.231898	0.669073	0.693314	-0.387772	0.566095	-0.436361	0.25713	0.261328	-0.0091753	-0.495971	-0.30775	-0.0808205	-0.0851051	-0.0378056	0.405969	-0.32799	0.250757	-0.301921	0.188424	0.137245	0.229873	-0.279712	-0.311014	-0.00398841	-0.024443	0.152557	0.0298193	0.217137	M1 turquoise DNA Repair|0.7123
CRB1|P82279	turquoise	0.712183	0.153708	-0.0558419	-0.30885	0.523683	0.615872	-0.116001	0.374184	-0.418389	0.217753	0.330439	-0.138349	-0.624747	-0.0831391	-0.237443	-0.0419373	-0.291843	0.135786	-0.401974	0.438567	-0.488042	0.212354	-0.161542	0.445937	-0.153851	-0.223656	-0.0216077	-0.0228358	0.0850053	0.149095	0.0796475	M1 turquoise DNA Repair|0.7122
INPP5E|Q9NRR6	turquoise	0.711218	0.129649	-0.121733	-0.242619	0.319433	0.491352	-0.191987	0.566116	-0.242313	0.238744	0.0262516	-0.128166	-0.582788	-0.149598	-0.340788	-0.136984	-0.171738	0.201367	-0.239717	0.319803	-0.361672	0.277522	-0.273552	0.431719	-0.0663844	-0.163859	0.13852	-0.019437	0.125436	-0.0261189	0.108061	M1 turquoise DNA Repair|0.7112
C11orf73|Q53FT3	turquoise	0.710116	-0.0836409	-0.351888	-0.187188	0.65326	0.513147	-0.264798	0.424659	-0.299196	0.254998	0.152241	-0.00934985	-0.674904	-0.203074	-0.363078	-0.253964	-0.131736	0.210152	-0.4791	0.463711	-0.365613	0.0563866	0.0493538	0.494019	-0.0274922	-0.120462	0.182896	-0.213992	0.203925	-0.0865679	0.0638028	M1 turquoise DNA Repair|0.7101
CCL24|O00175	turquoise	0.709969	0.0749608	-0.250767	-0.322208	0.497628	0.414304	-0.294809	0.409186	-0.146862	0.340154	0.0117777	0.031317	-0.635917	-0.275881	-0.418012	-0.046946	-0.200479	0.339648	-0.314986	0.518893	-0.284124	0.290967	-0.0444316	0.387775	-0.195157	-0.171386	0.101487	-0.0652251	0.00849459	0.0356619	0.137558	M1 turquoise DNA Repair|0.71
PTK2|Q05397	turquoise	0.709993	0.0369497	-0.167327	-0.253133	0.409425	0.686567	-0.132781	0.387718	-0.508343	0.191293	0.321263	-0.0957674	-0.630572	-0.109151	-0.176217	-0.215422	-0.382626	0.117902	-0.469633	0.19093	-0.468415	0.138206	-0.193987	0.5044	-0.0197093	-0.0614919	0.125419	-0.0510826	0.150903	0.0724551	0.163085	M1 turquoise DNA Repair|0.71
ID2|Q02363	turquoise	0.709798	0.109131	-0.134067	-0.321579	0.323339	0.538836	-0.20644	0.519871	-0.339696	0.299796	0.168857	-0.0609637	-0.509783	-0.219859	-0.22961	0.100692	-0.300434	0.309466	-0.247254	0.305154	-0.345714	0.300743	-0.285664	0.43592	-0.158702	-0.183722	0.0968765	-0.0154143	0.0920367	-0.00933952	0.180283	M1 turquoise DNA Repair|0.7098
IFNA14|P01570	turquoise	0.709502	-0.0375868	-0.30691	-0.190064	0.672867	0.528081	-0.28737	0.503971	-0.283728	0.284306	0.104245	-0.0435261	-0.624038	-0.253151	-0.313893	-0.28867	-0.118109	0.303337	-0.377322	0.418982	-0.332349	0.160844	0.107224	0.416226	-0.121524	-0.173845	0.166413	-0.170977	0.213415	0.031366	0.13134	M1 turquoise DNA Repair|0.7095
FXYD4|P59646	turquoise	0.708479	0.0377875	-0.166005	-0.138703	0.553879	0.71518	-0.122495	0.277231	-0.466885	0.176616	0.387274	-0.0828978	-0.723753	-0.0245114	-0.247675	-0.212176	-0.399663	0.0121775	-0.58474	0.406616	-0.510407	0.0285988	-0.206733	0.471288	-0.0769286	-0.09002	-0.0272857	-0.0992268	0.125889	-0.036636	0.0640214	M1 turquoise DNA Repair|0.7085
VAMP4|O75379	turquoise	0.704206	0.0163061	-0.186654	-0.0877044	0.330524	0.531237	-0.234208	0.463451	-0.282955	0.32474	0.108446	0.0197153	-0.583823	-0.181579	-0.353034	-0.206719	-0.26526	0.191349	-0.352795	0.370393	-0.2966	0.221488	-0.289667	0.441677	-0.145749	-0.193698	0.0378459	-0.0516163	0.138297	-0.0126068	0.151165	M1 turquoise DNA Repair|0.7042
NANOG|Q9H9S0	turquoise	0.703369	-0.0468729	-0.265949	-0.156258	0.359397	0.66648	-0.327258	0.678644	-0.476303	0.381598	0.226337	0.126519	-0.473777	-0.256733	-0.0473022	-0.269409	-0.211855	0.27734	-0.389963	0.04502	-0.190809	0.116456	-0.220481	0.442249	-0.0997638	-0.216514	0.131892	-0.0518516	0.274122	-0.104277	0.311912	M1 turquoise DNA Repair|0.7034
PCDHGA8|Q9Y5G5	turquoise	0.7032	-0.0535915	-0.367232	-0.189783	0.548345	0.33157	-0.443017	0.579857	-0.0866389	0.370587	-0.118132	0.110477	-0.551401	-0.347972	-0.419013	-0.102212	0.0744382	0.424569	-0.241231	0.505093	-0.127741	0.243014	0.0381709	0.251214	-0.194698	-0.180088	0.119383	-0.0563374	0.157404	-0.0902582	0.262496	M1 turquoise DNA Repair|0.7032
GRB7|Q14451	turquoise	0.703104	0.0989304	-0.253009	-0.224086	0.594941	0.581569	-0.343153	0.454995	-0.233661	0.349708	0.181762	0.00588218	-0.513662	-0.316273	-0.153427	-0.0370247	-0.225922	0.423539	-0.326302	0.43648	-0.284994	0.296424	0.0562221	0.29368	-0.305178	-0.250415	-0.0535654	-0.080616	0.0523982	-0.0112121	0.0787793	M1 turquoise DNA Repair|0.7031
CHST14|Q8NCH0	turquoise	0.70247	0.0568255	-0.14339	-0.217388	0.618089	0.500466	-0.170878	0.433527	-0.268308	0.161377	0.144871	-0.141897	-0.619494	-0.141694	-0.290518	-0.150388	-0.189609	0.183008	-0.369807	0.474929	-0.397926	0.170379	0.0518274	0.35251	-0.124794	-0.150406	0.0924476	0.0438408	0.117063	0.00014888	0.234428	M1 turquoise DNA Repair|0.7025
TRAPPC4|Q9Y296	turquoise	0.702131	-0.111791	-0.394506	-0.175635	0.632948	0.671571	-0.23959	0.47817	-0.449399	0.276539	0.27185	0.00516	-0.704413	-0.111229	-0.245921	-0.315305	-0.195132	0.106695	-0.629656	0.337301	-0.416808	-0.0228014	-0.0162026	0.554141	0.0350339	-0.111149	0.23446	-0.242246	0.302298	-0.125256	0.0651753	M1 turquoise DNA Repair|0.7021
OPALIN|Q96PE5	turquoise	0.701283	0.0753405	-0.153768	-0.135301	0.479041	0.600011	-0.223552	0.513071	-0.327296	0.272203	0.192381	-0.0774154	-0.577902	-0.189335	-0.219599	-0.299709	-0.261253	0.257456	-0.391469	0.265506	-0.369312	0.214022	-0.0872133	0.425852	-0.131096	-0.221041	0.0119087	-0.0278532	0.125152	0.0604165	0.19811	M1 turquoise DNA Repair|0.7013
ZG16|O60844	turquoise	0.70092	0.141882	-0.139087	-0.230987	0.427244	0.742389	-0.27231	0.573309	-0.518783	0.254683	0.31868	-0.0123877	-0.473075	-0.218258	-0.0231311	-0.0827166	-0.255697	0.232002	-0.32915	0.134423	-0.3404	0.213075	-0.185976	0.379681	-0.14189	-0.283913	0.0235512	-0.0173234	0.135256	0.0734864	0.154906	M1 turquoise DNA Repair|0.7009
POU2F1|P14859	turquoise	0.700715	-0.0421776	-0.352648	-0.110104	0.236774	0.375333	-0.376048	0.644365	-0.0638559	0.453926	-0.140669	0.135133	-0.562409	-0.395569	-0.456802	-0.208085	-0.220763	0.34168	-0.237238	0.391915	-0.168826	0.343143	-0.348698	0.462097	-0.161481	-0.261511	0.171888	-0.0734809	0.152906	-0.0750176	0.219855	M1 turquoise DNA Repair|0.7007
CASP2|P42575	turquoise	0.700442	-0.0768692	-0.247265	-0.0963926	0.308378	0.631857	-0.214273	0.557796	-0.44473	0.345214	0.231859	0.0860515	-0.553794	-0.220265	-0.147271	-0.277802	-0.297373	0.19084	-0.435279	0.141195	-0.272265	0.0883181	-0.340371	0.500544	-0.00265788	-0.130438	0.200878	-0.137311	0.248788	-0.0300379	0.158379	M1 turquoise DNA Repair|0.7004
DNAI1|Q9UI46	turquoise	0.699883	-0.0667849	-0.408127	-0.150762	0.532235	0.308281	-0.497668	0.616337	0.0419188	0.446063	-0.165205	0.1364	-0.532663	-0.443071	-0.441612	-0.174669	0.0538198	0.509892	-0.17862	0.576475	-0.100426	0.305182	0.0351322	0.209179	-0.275638	-0.283517	0.0917697	-0.0743942	0.152031	-0.0763252	0.223494	M1 turquoise DNA Repair|0.6999
EXOSC1|Q9Y3B2	turquoise	0.699361	0.00419219	-0.227672	-0.244351	0.352737	0.565206	-0.278718	0.475647	-0.301316	0.498812	0.199356	0.148427	-0.538639	-0.246157	-0.189195	-0.149297	-0.38993	0.283703	-0.409285	0.321464	-0.216511	0.234619	-0.218332	0.506976	-0.186282	-0.183843	0.0418723	-0.11062	0.125688	0.351755	0.152567	M1 turquoise DNA Repair|0.6994
PLAT|P00750	turquoise	0.696939	-0.100046	-0.323568	-0.108457	0.185294	0.452569	-0.262087	0.658321	-0.233577	0.451351	0.00431035	0.137583	-0.553046	-0.269684	-0.343353	-0.285481	-0.285184	0.229862	-0.335645	0.228252	-0.182274	0.212224	-0.439466	0.570423	-0.026951	-0.195157	0.22263	-0.180507	0.27182	-0.0464163	0.150728	M1 turquoise DNA Repair|0.6969
FGFR2|P21802	turquoise	0.696239	-0.0868178	-0.374192	-0.0310926	0.528492	0.499872	-0.423285	0.592634	-0.237646	0.376746	0.0642556	0.136127	-0.512749	-0.320214	-0.268404	-0.132299	0.00852306	0.395637	-0.320958	0.350458	-0.146008	0.136033	-0.0161411	0.234045	-0.222566	-0.248962	0.0859715	-0.197486	0.24933	-0.0884601	0.10449	M1 turquoise DNA Repair|0.6962
PLA2G10|O15496	turquoise	0.695747	-0.00952458	-0.198926	-0.238582	0.562996	0.60876	-0.155362	0.442041	-0.370774	0.313341	0.284034	0.00020221	-0.625923	-0.121837	-0.231101	-0.285494	-0.302481	0.112656	-0.507169	0.342739	-0.348576	0.104265	-0.0783311	0.540864	-0.0439063	-0.174081	0.114221	-0.140407	0.182123	0.0423408	0.130109	M1 turquoise DNA Repair|0.6957
CEACAM21|Q3KPI0	turquoise	0.695649	-0.0496226	-0.252665	-0.158458	0.379919	0.601808	-0.230549	0.58325	-0.374931	0.236452	0.13073	-0.0207419	-0.580294	-0.171894	-0.247052	-0.34158	-0.156822	0.177551	-0.397465	0.168976	-0.307391	0.0557647	-0.22636	0.445738	-0.00843049	-0.130797	0.186135	-0.107467	0.276835	-0.0703854	0.16152	M1 turquoise DNA Repair|0.6956
CRISP3|P54108	turquoise	0.694837	-0.0732567	-0.273822	-0.183363	0.381938	0.645645	-0.22374	0.44088	-0.427308	0.32175	0.262475	0.0514232	-0.617276	-0.200987	-0.182935	-0.21724	-0.383201	0.15789	-0.506527	0.232328	-0.329006	0.124671	-0.229271	0.561607	-0.0184586	-0.13374	0.123309	-0.0999363	0.146968	0.11255	0.237723	M1 turquoise DNA Repair|0.6948
DYNLL1|P63167	turquoise	0.69485	0.127503	-0.11447	-0.254115	0.418067	0.683522	-0.236836	0.470613	-0.507721	0.260393	0.318077	-0.0286556	-0.482869	-0.204679	-0.0614377	-0.127506	-0.283197	0.265492	-0.329731	0.164632	-0.339728	0.216121	-0.170916	0.32962	-0.180882	-0.236703	0.0338908	0.00328511	0.0615882	0.0100746	0.206958	M1 turquoise DNA Repair|0.6948
ZBTB33|Q86T24	turquoise	0.694495	0.0746247	-0.227875	-0.250793	0.444214	0.298285	-0.285386	0.492999	-0.0828487	0.226346	-0.17324	-0.0585079	-0.558459	-0.327572	-0.512934	-0.0143173	-0.0258121	0.378469	-0.0554181	0.511626	-0.242721	0.379873	-0.0464577	0.275661	-0.226279	-0.180676	0.143297	0.0345403	0.0711078	0.00804747	0.169399	M1 turquoise DNA Repair|0.6945
NLRP4|Q96MN2	turquoise	0.693783	0.0255733	-0.325267	-0.197944	0.642356	0.550234	-0.443255	0.513072	-0.242047	0.353174	0.111376	0.0704726	-0.536147	-0.392848	-0.216391	-0.162676	-0.0234692	0.435515	-0.313981	0.417008	-0.22603	0.254042	0.162794	0.260437	-0.251652	-0.300063	0.0472139	-0.0574936	0.0892558	0.00829329	0.185085	M1 turquoise DNA Repair|0.6938
KIR3DS1|Q14943	turquoise	0.693383	0.00563333	-0.291911	-0.247158	0.656979	0.534604	-0.284604	0.534314	-0.304153	0.273879	0.127323	-0.0552064	-0.550339	-0.290075	-0.207721	-0.167055	-0.0976277	0.343494	-0.293202	0.350787	-0.294828	0.235448	0.151869	0.359727	-0.156616	-0.240072	0.14654	-0.0928472	0.175667	0.0261952	0.176034	M1 turquoise DNA Repair|0.6934
CD226|Q15762	turquoise	0.691209	0.0266034	-0.191668	-0.218867	0.580276	0.59311	-0.309348	0.59495	-0.378417	0.322112	0.200156	0.0101171	-0.515817	-0.225182	-0.151762	-0.247008	-0.0890018	0.320391	-0.326836	0.248328	-0.257954	0.160225	0.0175956	0.375815	-0.183236	-0.297422	0.0533398	0.026585	0.194194	0.0165279	0.320945	M1 turquoise DNA Repair|0.6912
SLC16A3|O15427	turquoise	0.689865	0.181424	-0.00528203	-0.270468	0.295189	0.543325	-0.117314	0.338081	-0.336852	0.226762	0.209902	-0.0979804	-0.55033	-0.0838325	-0.26247	-0.025105	-0.373851	0.139422	-0.278603	0.387917	-0.404241	0.266492	-0.346947	0.427075	-0.122745	-0.121973	0.0229406	0.105903	0.0115237	0.0407214	0.153582	M1 turquoise DNA Repair|0.6899
ANAPC10|Q9UM13	turquoise	0.68787	0.492894	0.0308329	-0.517123	0.436323	0.499506	-0.240929	0.392408	-0.185881	0.22068	0.100185	-0.157687	-0.467196	-0.409323	-0.18586	0.193545	-0.217825	0.520544	0.00205106	0.443235	-0.331392	0.680988	0.00317374	0.251471	-0.343182	-0.280975	-0.027561	0.246624	-0.260847	0.354581	0.208513	M1 turquoise DNA Repair|0.6879
C2orf82|Q6UX34	turquoise	0.687479	0.0141812	-0.235011	-0.132434	0.666137	0.668367	-0.216663	0.509718	-0.495604	0.206225	0.28248	-0.0915948	-0.530377	-0.220804	-0.0846678	-0.256527	-0.108014	0.293681	-0.408282	0.190786	-0.368679	0.116856	0.117605	0.342486	-0.134244	-0.250989	0.0987386	-0.120589	0.208633	-0.0648283	0.131567	M1 turquoise DNA Repair|0.6875
SPACA1|Q9HBV2	turquoise	0.68731	0.0435188	-0.179987	-0.228888	0.437406	0.722641	-0.251809	0.548615	-0.535135	0.334469	0.35806	0.0342189	-0.452873	-0.184942	0.0529711	-0.141191	-0.311595	0.251621	-0.400566	0.078193	-0.292393	0.162834	-0.116662	0.396103	-0.152248	-0.213685	0.0631008	-0.0673369	0.190011	0.123261	0.190913	M1 turquoise DNA Repair|0.6873
FGF8|P55075	turquoise	0.685244	-0.290895	-0.494341	-0.0446323	0.186833	0.413334	-0.235432	0.555434	-0.186975	0.368753	-0.105969	0.119974	-0.667862	-0.252241	-0.467798	-0.346682	-0.253649	0.204258	-0.467704	0.235387	-0.225875	0.0435536	-0.360396	0.612857	0.105138	0.0209289	0.455581	-0.307	0.368385	-0.122009	0.0723308	M1 turquoise DNA Repair|0.6852
YES1|P07947	turquoise	0.682726	-0.137438	-0.333374	-0.152082	0.383287	0.679413	-0.20747	0.551408	-0.462393	0.431999	0.345539	0.105617	-0.664461	-0.129071	-0.153218	-0.417617	-0.443639	0.0433455	-0.676908	0.21762	-0.354138	0.0121106	-0.342538	0.643427	0.0472474	-0.115665	0.151029	-0.251895	0.29363	-0.0474774	0.166133	M1 turquoise DNA Repair|0.6827
DHX8|Q14562	turquoise	0.682125	0.091655	-0.215802	-0.194657	0.432889	0.358861	-0.238849	0.478683	-0.076782	0.234202	-0.0448214	-0.0841906	-0.614029	-0.240622	-0.434187	-0.13434	-0.160818	0.222689	-0.24941	0.532834	-0.317894	0.305416	-0.150945	0.399922	-0.128679	-0.1983	0.125285	-0.045844	0.0579144	0.0107113	0.120083	M1 turquoise DNA Repair|0.6821
TMEM52|Q8NDY8	turquoise	0.68162	-0.0508117	-0.315799	-0.0786475	0.488963	0.425327	-0.347557	0.530853	-0.16467	0.336549	0.0100417	0.0471932	-0.542772	-0.314148	-0.345313	-0.176813	-0.0631127	0.321551	-0.257768	0.415359	-0.22926	0.223014	-0.0563751	0.2653	-0.186292	-0.277523	0.0680063	-0.0359328	0.187961	-0.096642	0.236629	M1 turquoise DNA Repair|0.6816
DTX3L|Q8TDB6	turquoise	0.68086	-0.0244188	-0.338783	-0.251207	0.567979	0.40459	-0.301132	0.522728	-0.143461	0.34922	-0.0136351	-0.00803851	-0.602835	-0.312493	-0.393278	-0.133581	-0.130579	0.351555	-0.262649	0.469362	-0.285843	0.23151	0.00191709	0.350703	-0.0954295	-0.13555	0.178554	-0.108621	0.147885	-0.154803	0.168673	M1 turquoise DNA Repair|0.6809
MYB|P10242	turquoise	0.680677	-0.0394984	-0.298317	-0.128703	0.512087	0.426637	-0.360881	0.52909	-0.0914614	0.339743	0.0209632	0.0670644	-0.547874	-0.302782	-0.3265	-0.20851	-0.125884	0.326496	-0.311772	0.486147	-0.193332	0.233133	-0.0570919	0.286852	-0.207032	-0.218871	0.0534037	0.0230746	0.124001	-0.0256691	0.300215	M1 turquoise DNA Repair|0.6807
CA2|P00918	turquoise	0.680506	-0.0797776	-0.343157	-0.117604	0.447901	0.537087	-0.431655	0.677021	-0.306061	0.435561	0.0720318	0.188283	-0.445909	-0.378751	-0.169071	-0.124883	-0.0483206	0.410503	-0.287439	0.198583	-0.106377	0.182774	-0.0825275	0.271719	-0.166944	-0.257845	0.172155	-0.125402	0.265594	-0.0761358	0.245042	M1 turquoise DNA Repair|0.6805
MYSM1|Q5VVJ2	turquoise	0.680285	0.0595976	-0.400066	-0.33759	0.510244	0.370391	-0.66297	0.620889	-0.00546733	0.62659	-0.0268907	0.26474	-0.386808	-0.619507	-0.18992	0.0131316	-0.0748328	0.701921	-0.151199	0.489722	-0.000975493	0.518941	0.112923	0.241947	-0.437057	-0.39073	-0.00147513	-0.0771017	-0.043083	0.148333	0.253726	M1 turquoise DNA Repair|0.6803
C2orf66|Q6UXQ4	turquoise	0.679046	-0.0324463	-0.305373	-0.14758	0.466239	0.47286	-0.301567	0.617293	-0.26362	0.362072	0.0562427	0.107911	-0.531324	-0.28422	-0.23892	-0.197435	-0.130368	0.312684	-0.31176	0.322967	-0.187225	0.19479	-0.145396	0.377573	-0.111962	-0.187187	0.154254	-0.129651	0.212001	-0.133138	0.184065	M1 turquoise DNA Repair|0.679
MUC4|Q99102	turquoise	0.678926	0.0270433	-0.235074	-0.223728	0.20437	0.269474	-0.295947	0.464648	-0.0104573	0.35391	-0.183353	0.0638958	-0.513071	-0.274464	-0.50768	0.0738725	-0.165434	0.328426	-0.105532	0.469863	-0.183884	0.331602	-0.282425	0.353996	-0.189321	-0.142189	0.119492	0.00936425	0.0645232	0.057606	0.149524	M1 turquoise DNA Repair|0.6789
TOX3|O15405	turquoise	0.67847	-0.220143	-0.454653	-0.145149	0.277344	0.401263	-0.271593	0.461819	-0.117489	0.413968	-0.0734009	0.140303	-0.679611	-0.217133	-0.476118	-0.233836	-0.276296	0.181563	-0.451758	0.360971	-0.23869	0.0985148	-0.268544	0.652939	0.106782	-0.00605368	0.35973	-0.29741	0.235136	0.00663584	0.0141012	M1 turquoise DNA Repair|0.6785
WFDC2|Q14508	turquoise	0.677931	0.208023	-0.207178	-0.253921	0.499883	0.601377	-0.408113	0.564805	-0.341489	0.411262	0.196885	0.0808557	-0.470153	-0.342727	-0.108928	-0.194778	-0.111865	0.389289	-0.272706	0.259215	-0.226654	0.350465	-0.0543178	0.302755	-0.226325	-0.226821	-0.0130322	-0.133108	0.0905525	0.0288691	0.0112138	M1 turquoise DNA Repair|0.6779
RAB27B|O00194	turquoise	0.677179	-0.014026	-0.360332	-0.207724	0.621426	0.537181	-0.438933	0.516521	-0.196204	0.415591	0.171523	0.163941	-0.542342	-0.287061	-0.149905	-0.0860905	-0.109088	0.335629	-0.41493	0.44093	-0.181226	0.201539	0.0606908	0.345938	-0.21946	-0.264544	0.018007	-0.105684	0.144666	0.0742495	0.201741	M1 turquoise DNA Repair|0.6772
MEPE|Q9NQ76	turquoise	0.676581	-0.0738097	-0.287187	-0.102467	0.322327	0.533085	-0.253499	0.571403	-0.335666	0.45875	0.19593	0.131924	-0.569874	-0.263972	-0.239755	-0.323516	-0.355368	0.174927	-0.47588	0.259624	-0.22178	0.154417	-0.312775	0.58446	-0.0907989	-0.257447	0.114313	-0.16513	0.251393	-0.0139358	0.198219	M1 turquoise DNA Repair|0.6766
HS6ST2|Q96MM7	turquoise	0.67546	0.117283	-0.184029	-0.273962	0.357045	0.358343	-0.279104	0.362896	-0.0629568	0.293154	-0.0243355	-0.000993361	-0.550307	-0.274474	-0.411323	0.0632172	-0.276223	0.332026	-0.163404	0.537296	-0.259611	0.411012	-0.145724	0.335366	-0.283148	-0.219778	0.0124479	-0.0268802	-0.0111325	0.105882	0.0842784	M1 turquoise DNA Repair|0.6755
TXNDC11|Q6PKC3	turquoise	0.674008	-0.00320873	-0.184174	-0.153045	0.320369	0.664087	-0.196351	0.524234	-0.460202	0.302864	0.283667	0.0127415	-0.532414	-0.164925	-0.127973	-0.185991	-0.327268	0.207005	-0.422969	0.168606	-0.327855	0.113118	-0.261007	0.447941	-0.148539	-0.243	0.0444668	-0.0977307	0.262244	0.0411498	0.158345	M1 turquoise DNA Repair|0.674
BIRC7|Q96CA5	turquoise	0.672968	0.112598	-0.0630376	-0.358028	0.262677	0.624746	-0.115268	0.473078	-0.401262	0.352086	0.293443	0.0365071	-0.585215	-0.078877	-0.137113	-0.22859	-0.456047	0.0696052	-0.456356	0.227084	-0.320388	0.230092	-0.36166	0.626487	-0.0106359	-0.0847806	0.0826096	0.012328	0.0420794	0.274746	0.200163	M1 turquoise DNA Repair|0.673
CRYAA|P02489	turquoise	0.672413	-0.0387966	-0.311876	-0.151635	0.605932	0.528509	-0.380079	0.614542	-0.288224	0.331527	0.105372	0.0674427	-0.460745	-0.282211	-0.106008	-0.198569	-0.00310511	0.464071	-0.278287	0.291955	-0.175982	0.166725	0.167583	0.175298	-0.238395	-0.275537	0.0791683	-0.0741677	0.226506	-0.0821019	0.237265	M1 turquoise DNA Repair|0.6724
C7orf69|Q9H7B7	turquoise	0.670539	0.0357907	-0.193296	-0.204551	0.310094	0.484327	-0.123398	0.308701	-0.24432	0.316284	0.156551	-0.00989822	-0.698598	-0.0726934	-0.413594	-0.135408	-0.399081	0.0134871	-0.482739	0.490259	-0.41957	0.174678	-0.348975	0.631611	0.00353763	-0.0397661	0.0876763	-0.213518	0.0795777	0.0645696	-0.101152	M1 turquoise DNA Repair|0.6705
SCARB2|Q14108	turquoise	0.670202	0.12512	-0.151821	-0.242914	0.260396	0.424082	-0.270782	0.534626	-0.151503	0.282309	-0.0780668	-0.0833288	-0.518161	-0.349471	-0.335183	-0.105216	-0.149158	0.39822	-0.132741	0.273412	-0.280026	0.41919	-0.215359	0.311956	-0.152023	-0.238906	0.141262	0.301536	-0.0397191	0.00318206	0.487286	M1 turquoise DNA Repair|0.6702
SMDT1|Q9H4I9	turquoise	0.668524	0.000735633	-0.231304	-0.18001	0.392973	0.477312	-0.23776	0.474574	-0.28919	0.205008	0.0392005	-0.0244783	-0.549068	-0.19981	-0.357734	-0.211403	-0.10789	0.249038	-0.25151	0.306909	-0.265551	0.152139	-0.163397	0.330716	-0.115552	-0.18027	0.159398	-0.0440911	0.177672	-0.0879817	0.151677	M1 turquoise DNA Repair|0.6685
PIP|P12273	turquoise	0.668266	0.056724	-0.308984	-0.175395	0.439195	0.525615	-0.418479	0.607673	-0.233195	0.393633	0.110282	0.0487767	-0.512571	-0.416439	-0.180964	-0.143723	-0.145731	0.428262	-0.332466	0.298449	-0.249706	0.328587	-0.101221	0.394136	-0.204587	-0.368552	0.106523	-0.0324362	0.0801658	-0.00294822	0.255187	M1 turquoise DNA Repair|0.6683
BCL6|P41182	turquoise	0.66455	-0.120238	-0.258159	-0.107592	0.307661	0.459557	-0.184985	0.3724	-0.193294	0.502854	0.241128	0.216154	-0.670145	-0.058988	-0.268441	-0.209001	-0.520557	-0.0105988	-0.642498	0.524526	-0.22756	0.0916073	-0.347083	0.686843	-0.0246159	-0.0467245	0.036949	-0.23735	0.173881	0.179531	0.056343	M1 turquoise DNA Repair|0.6646
KIR3DL2|P43630	turquoise	0.663853	0.121482	-0.10008	-0.300606	0.414297	0.646543	-0.0332138	0.29005	-0.424951	0.17618	0.350285	-0.106333	-0.626468	-0.023414	-0.15955	-0.018226	-0.481862	0.0786251	-0.48118	0.298621	-0.467439	0.169043	-0.206176	0.562683	-0.084752	-0.0727977	0.0824869	-0.0738292	0.108233	0.14766	0.0255247	M1 turquoise DNA Repair|0.6639
BIRC5|O15392	turquoise	0.663729	-0.231143	-0.39451	-0.0424704	0.638677	0.509525	-0.232939	0.468864	-0.278087	0.279556	0.142872	0.0235065	-0.659268	-0.165128	-0.334553	-0.359145	-0.167705	0.148639	-0.518309	0.424154	-0.336719	-0.0564998	0.0312347	0.442831	-0.0360405	-0.202677	0.180398	-0.222058	0.343879	-0.107414	0.164228	M1 turquoise DNA Repair|0.6637
MYZAP|P0CAP1	turquoise	0.661889	-0.0483977	-0.316814	-0.125929	0.245083	0.310202	-0.370405	0.592009	-0.0931238	0.404517	-0.135915	0.16475	-0.470369	-0.282793	-0.383278	-0.0971039	-0.0832853	0.308059	-0.182572	0.355712	-0.0646093	0.269667	-0.257107	0.386504	-0.136426	-0.170696	0.14556	-0.0931178	0.182397	-0.0777228	0.166221	M1 turquoise DNA Repair|0.6619
SCAMP5|Q8TAC9	turquoise	0.660112	0.261412	-0.0396091	-0.266312	0.681714	0.565264	-0.248408	0.399294	-0.312184	0.254794	0.283059	-0.0924083	-0.526485	-0.260441	-0.170543	-0.204258	-0.159643	0.299105	-0.285538	0.470017	-0.351827	0.30486	0.0646213	0.245562	-0.256498	-0.27862	-0.0853179	0.131646	-0.0669315	0.0119448	0.227188	M1 turquoise DNA Repair|0.6601
HMGCR|P04035	turquoise	0.660036	-0.0922872	-0.30993	-0.143553	0.472031	0.32726	-0.310808	0.394988	-0.0537823	0.354745	-0.0570252	0.115205	-0.599822	-0.161051	-0.496843	-0.209618	-0.113205	0.20753	-0.314798	0.568902	-0.201393	0.136276	-0.0464652	0.349971	-0.163765	-0.163966	0.0720601	-0.146989	0.170306	0.0147606	0.0745319	M1 turquoise DNA Repair|0.66
WBP1|Q96G27	turquoise	0.658333	0.123126	-0.0914858	-0.249645	0.318822	0.642207	-0.162339	0.34382	-0.427431	0.292312	0.345105	0.0235438	-0.480942	-0.0866034	-0.0299536	0.00677178	-0.416074	0.153066	-0.388639	0.240606	-0.331406	0.211358	-0.217925	0.441361	-0.179344	-0.14222	-0.0556374	-0.0809003	0.0679811	0.133493	0.0106601	M1 turquoise DNA Repair|0.6583
MFF|P0DMV8	turquoise	0.657404	-0.00725201	-0.140028	-0.153852	0.369123	0.660884	-0.142603	0.304951	-0.467644	0.369019	0.392215	0.170274	-0.640779	0.0968872	-0.152975	-0.205824	-0.390882	-0.0634917	-0.676247	0.294627	-0.302583	-0.0238174	-0.310817	0.591896	-0.0212377	0.0319433	-0.0626181	-0.250847	0.192067	0.0911648	-0.0491284	M1 turquoise DNA Repair|0.6574
FAM162A|Q96A26	turquoise	0.656019	-0.108983	-0.198269	-0.193315	0.516137	0.576396	-0.0867426	0.360886	-0.398214	0.209813	0.247771	-0.0734661	-0.66362	0.0461473	-0.272396	-0.232487	-0.257259	-0.00359802	-0.554101	0.313248	-0.435675	-0.0961126	-0.108459	0.560575	0.125673	0.0832542	0.195325	-0.205941	0.2546	-0.0871294	0.00876537	M1 turquoise DNA Repair|0.656
KIF22|Q14807	turquoise	0.655135	0.108549	-0.0378672	-0.208318	0.299809	0.583122	0.0143252	0.246452	-0.323328	0.228935	0.337044	-0.0615034	-0.708217	0.0201355	-0.251178	-0.268586	-0.608202	-0.0965942	-0.578643	0.404241	-0.458329	0.151591	-0.375786	0.655455	-0.000114414	-0.0600124	0.00683008	-0.0323419	0.00902586	0.211691	0.0774782	M1 turquoise DNA Repair|0.6551
GH1|P01241	turquoise	0.654554	0.124826	-0.256245	-0.168195	0.370917	0.509043	-0.427867	0.585386	-0.194701	0.414298	0.0467803	0.111803	-0.380487	-0.513948	-0.0787735	-0.0463618	-0.127737	0.634908	-0.130895	0.216746	-0.107723	0.430841	-0.00214091	0.198656	-0.344504	-0.391137	0.0247661	0.00119797	0.0304008	0.137272	0.247525	M1 turquoise DNA Repair|0.6546
CD40LG|P29965	turquoise	0.653959	-0.112155	-0.320897	-0.0913324	0.410609	0.643979	-0.159836	0.454275	-0.458831	0.20704	0.212513	-0.041106	-0.651169	-0.111157	-0.240144	-0.322393	-0.210776	0.0990032	-0.539378	0.145939	-0.397988	-0.0160369	-0.16973	0.543776	0.0775167	-0.0624054	0.275057	-0.241721	0.344216	-0.101641	0.00354519	M1 turquoise DNA Repair|0.654
CA9|Q16790	turquoise	0.652355	0.161629	-0.0118657	-0.33417	0.27599	0.575762	-0.126628	0.561021	-0.420592	0.357798	0.291061	0.00836211	-0.46115	-0.207932	-0.0324252	-0.118392	-0.390189	0.239625	-0.310208	0.122441	-0.245219	0.326449	-0.258373	0.504153	-0.10881	-0.210381	0.0816288	0.127064	0.0318926	0.209147	0.409488	M1 turquoise DNA Repair|0.6524
CALCA|P01258	turquoise	0.650857	-0.000487021	-0.247415	-0.0955777	0.468369	0.279766	-0.286292	0.297784	-0.0371884	0.349696	-0.0554488	0.0752131	-0.561496	-0.240688	-0.474514	0.0895025	-0.149653	0.290123	-0.240233	0.681267	-0.230407	0.286349	-0.0586692	0.300875	-0.25955	-0.202864	-0.00355154	-0.0286393	0.036657	-0.00595997	0.0921892	M1 turquoise DNA Repair|0.6509
IL5RA|Q01344	turquoise	0.649466	0.0279318	-0.207102	-0.0979424	0.411247	0.365625	-0.253708	0.378262	-0.091318	0.252709	-0.0417475	-0.0656601	-0.615035	-0.163191	-0.441411	-0.192174	-0.181037	0.216382	-0.282179	0.502937	-0.320844	0.228399	-0.175676	0.305623	-0.102002	-0.151355	0.0909168	-0.0069386	0.0751132	0.0833765	0.141109	M1 turquoise DNA Repair|0.6495
KYNU|Q16719	turquoise	0.648179	0.0606054	-0.143008	-0.273335	0.418416	0.449715	-0.0494802	0.255488	-0.206809	0.137488	0.0893786	-0.177109	-0.711684	-0.0926943	-0.456103	-0.207241	-0.340708	0.0195196	-0.394681	0.476713	-0.49338	0.179201	-0.187635	0.606585	0.118548	0.0427386	0.26838	-0.0905802	0.0248175	0.0828654	-0.0316482	M1 turquoise DNA Repair|0.6482
MTRF1L|Q9UGC7	turquoise	0.646986	0.12551	-0.211101	-0.27302	0.611113	0.477214	-0.375204	0.510618	-0.231298	0.298634	0.100888	0.0402174	-0.475926	-0.249586	-0.171457	0.0675925	-0.0025723	0.381546	-0.248725	0.379728	-0.198732	0.264753	0.125224	0.186874	-0.260777	-0.173736	-0.0452515	-0.0129127	0.0794813	0.0198534	0.192262	M1 turquoise DNA Repair|0.647
CD5|P06127	turquoise	0.646621	-0.160112	-0.226106	0.053727	0.2224	0.67074	-0.114008	0.555461	-0.520701	0.400583	0.355244	0.127731	-0.532313	-0.0772143	-0.034688	-0.357912	-0.523163	0.015489	-0.602803	0.0594862	-0.269308	-0.0375007	-0.450005	0.596689	0.0245838	-0.181148	0.103386	-0.169111	0.354661	-0.0731853	0.180312	M1 turquoise DNA Repair|0.6466
ITM2A|O43736	turquoise	0.64387	-0.0143379	-0.236427	-0.241667	0.568679	0.468681	-0.0980749	0.324865	-0.311961	0.178897	0.21007	-0.106303	-0.676406	-0.0763831	-0.335239	-0.120199	-0.223168	0.0317459	-0.496695	0.466117	-0.456303	0.073691	0.000339902	0.623764	0.113864	0.00734011	0.235767	-0.188733	0.154582	-0.0473815	-0.0184325	M1 turquoise DNA Repair|0.6439
AURKB|Q96GD4	turquoise	0.642061	-0.0146732	-0.346378	-0.206851	0.647517	0.555543	-0.410646	0.547576	-0.320673	0.353007	0.212865	0.144847	-0.479367	-0.279948	-0.0794451	-0.105682	-0.0685767	0.354752	-0.38016	0.327651	-0.16883	0.13423	0.104885	0.239466	-0.236177	-0.20676	0.0134033	-0.140676	0.147628	-0.0676215	0.166628	M1 turquoise DNA Repair|0.6421
CD40|P25942	turquoise	0.640549	-0.0617347	-0.322874	-0.0797679	0.135877	0.258213	-0.343205	0.59893	0.00214159	0.43287	-0.248841	0.15572	-0.509468	-0.295321	-0.527042	-0.195912	-0.105147	0.314265	-0.149211	0.370247	-0.0973075	0.326233	-0.348829	0.424732	-0.15234	-0.206813	0.151722	-0.164636	0.210902	-0.0388711	0.07909	M1 turquoise DNA Repair|0.6405
KIF1C|O43896	turquoise	0.639434	-0.117292	-0.49115	-0.124571	0.426828	0.313724	-0.577223	0.606278	0.0299496	0.558772	-0.165484	0.274548	-0.470716	-0.463662	-0.375103	-0.221165	-0.0278164	0.500225	-0.22111	0.457762	-0.00452725	0.354585	-0.0347468	0.269429	-0.320076	-0.311997	0.00996438	-0.149562	0.151464	-0.0758997	0.237155	M1 turquoise DNA Repair|0.6394
SPATA31D4|Q6ZUB0	turquoise	0.638925	-0.125293	-0.368875	0.0312777	0.419059	0.484559	-0.317	0.52946	-0.21905	0.415597	0.107588	0.109322	-0.582345	-0.250265	-0.288744	-0.340863	-0.19666	0.187662	-0.499674	0.38256	-0.268182	0.132741	-0.148978	0.411979	-0.137477	-0.296646	0.0707941	-0.17574	0.242067	-0.109709	0.156118	M1 turquoise DNA Repair|0.6389
PSPN|O60542	turquoise	0.63546	0.0386391	-0.0890617	-0.129965	0.311101	0.447084	-0.0261737	0.342444	-0.21743	0.177761	0.126414	-0.134857	-0.652389	-0.0100894	-0.416449	-0.198181	-0.339483	0.0600284	-0.399084	0.425778	-0.446585	0.123681	-0.314452	0.487337	-0.0833464	-0.140942	0.0506477	-0.108225	0.131866	0.10152	0.00588134	M1 turquoise DNA Repair|0.6355
BTNL8|Q6UX41	turquoise	0.63534	0.00932254	-0.192687	-0.137908	0.357821	0.551336	-0.125638	0.350333	-0.309157	0.16743	0.128122	-0.120884	-0.651746	-0.163129	-0.357376	-0.27083	-0.238985	0.131176	-0.407206	0.289356	-0.438976	0.104367	-0.23379	0.526432	-2.18e-05	-0.129484	0.177163	-0.0316195	0.126788	0.00902936	0.136401	M1 turquoise DNA Repair|0.6353
LRRC74|Q0VAA2	turquoise	0.634754	0.180211	-0.221244	-0.282468	0.59246	0.539137	-0.461003	0.375873	-0.163361	0.513935	0.237771	0.180716	-0.424859	-0.453417	-0.0494688	0.0817848	-0.275822	0.555542	-0.24723	0.509665	-0.137874	0.48552	0.151684	0.236083	-0.489657	-0.421972	-0.224792	-0.0341348	-0.0856894	0.429029	0.160096	M1 turquoise DNA Repair|0.6348
TOR4A|Q9NXH8	turquoise	0.633035	0.222928	0.00751085	-0.26535	0.518111	0.616546	-0.0603121	0.207459	-0.390933	0.0580104	0.322343	-0.20595	-0.545565	-0.0555399	-0.174064	0.0846575	-0.322124	0.128663	-0.332662	0.36659	-0.474009	0.211634	-0.0843435	0.354195	-0.209828	-0.131704	-0.0959268	0.0971647	-0.0346216	0.0976037	0.087647	M1 turquoise DNA Repair|0.633
LPCAT2|Q7L5N7	turquoise	0.63208	0.00105247	-0.190058	-0.204346	0.218512	0.309477	-0.142746	0.384752	-0.083361	0.259712	-0.108951	-0.0970173	-0.577421	-0.177148	-0.500024	-0.118079	-0.266282	0.194733	-0.192065	0.4376	-0.332846	0.293737	-0.304948	0.497984	-0.0391099	-0.0788051	0.190564	0.00696698	0.109909	0.0741806	0.138023	M1 turquoise DNA Repair|0.6321
PSG7|Q13046	turquoise	0.632083	0.0560663	-0.21512	-0.172291	0.253657	0.285948	-0.338803	0.438299	-0.0413362	0.367502	-0.11881	0.0776081	-0.458615	-0.275547	-0.447256	-0.123327	-0.150431	0.357867	-0.109951	0.469197	-0.17826	0.361398	-0.247943	0.272172	-0.313469	-0.24361	-0.00294843	0.0172341	0.0316377	0.0203126	0.145154	M1 turquoise DNA Repair|0.6321
ZPBP|Q9BS86	turquoise	0.629882	0.186215	-0.109267	-0.401648	0.527813	0.53843	-0.289944	0.408214	-0.282519	0.40861	0.294916	0.0316993	-0.467464	-0.273923	-0.0758021	-0.15794	-0.306477	0.361878	-0.291937	0.331472	-0.242458	0.384171	0.0560433	0.428495	-0.244697	-0.25835	-0.0980213	-0.0721148	-0.023553	0.42303	0.139837	M1 turquoise DNA Repair|0.6299
DSC3|Q14574	turquoise	0.629637	0.000874076	-0.198729	-0.0435666	0.157394	0.394874	-0.227471	0.446121	-0.149706	0.310249	0.00365696	0.0316495	-0.476978	-0.242659	-0.32178	-0.12861	-0.287906	0.290404	-0.194211	0.331234	-0.201499	0.262345	-0.361048	0.357275	-0.165601	-0.219698	0.082731	-0.0514403	0.168116	0.0191901	0.111469	M1 turquoise DNA Repair|0.6296
KCNAB2|Q13303	turquoise	0.627464	0.360606	-0.0632697	-0.387004	0.596213	0.512893	-0.278884	0.2851	-0.234426	0.258397	0.254998	-0.0793205	-0.483359	-0.320191	-0.0923248	0.0725042	-0.286658	0.384253	-0.196569	0.504499	-0.353787	0.501109	0.102133	0.220483	-0.360391	-0.343056	-0.195272	0.0591168	-0.244054	0.20118	0.0944892	M1 turquoise DNA Repair|0.6275
LRIT2|A6NDA9	turquoise	0.62703	0.0942324	-0.163977	-0.133133	0.268006	0.482815	-0.29471	0.542664	-0.22339	0.363448	0.0715868	0.0525156	-0.480545	-0.188294	-0.178968	-0.196804	-0.216493	0.233927	-0.272475	0.218455	-0.20334	0.251557	-0.238963	0.386077	-0.126199	-0.135651	0.0354427	-0.0938392	0.157174	0.0512783	0.0543869	M1 turquoise DNA Repair|0.627
LAT2|Q9GZY6	turquoise	0.625929	0.120066	-0.130349	-0.10576	0.238773	0.48026	-0.165192	0.413205	-0.217666	0.321665	0.160535	0.00284811	-0.50922	-0.253021	-0.196145	-0.0523096	-0.44495	0.225868	-0.272935	0.369134	-0.294821	0.333721	-0.350458	0.447384	-0.209452	-0.289272	-0.0330914	-0.0696379	0.0680431	0.0866005	0.0488941	M1 turquoise DNA Repair|0.6259
PRKCZ|Q05513	turquoise	0.62496	-0.0633194	-0.243066	-0.193427	0.3498	0.436719	-0.146907	0.320372	-0.278805	0.290451	0.195081	0.0580486	-0.604268	-0.186223	-0.3125	-0.0133262	-0.34724	0.113987	-0.427975	0.387624	-0.294716	0.119398	-0.210991	0.568585	-0.0496484	-0.0412591	0.123387	-0.106954	0.116631	0.0238864	0.134622	M1 turquoise DNA Repair|0.625
ZNF566|Q969W8	turquoise	0.624637	0.042718	-0.322028	-0.143706	0.594556	0.308659	-0.485921	0.567878	-0.040096	0.403711	-0.110842	0.134304	-0.372159	-0.508018	-0.256656	0.051646	0.107284	0.57477	-0.0468615	0.485707	-0.0332569	0.399984	0.185533	0.0719489	-0.378627	-0.416292	0.00531733	-0.0146519	0.091574	0.0504463	0.242036	M1 turquoise DNA Repair|0.6246
NPTXR|O95502	turquoise	0.623583	0.0956632	-0.261324	-0.166133	0.393822	0.431181	-0.398274	0.559838	-0.209374	0.378289	0.00489714	0.0454776	-0.434092	-0.35414	-0.236941	-0.229913	-0.0398192	0.379649	-0.194462	0.237991	-0.179016	0.354121	-0.0880648	0.256669	-0.1578	-0.227561	0.0986858	0.0401312	0.0607024	-0.124291	0.215641	M1 turquoise DNA Repair|0.6236
KEL|P23276	turquoise	0.622737	0.0646996	-0.295483	-0.181516	0.410619	0.328572	-0.462626	0.548067	-0.0578652	0.354325	-0.127874	0.105837	-0.365637	-0.501504	-0.263596	-0.0860636	0.0166722	0.604827	-0.00552343	0.371806	-0.0515137	0.435639	0.0880904	0.126309	-0.374339	-0.401707	0.0667005	0.0642567	0.0358323	0.00948251	0.268294	M1 turquoise DNA Repair|0.6227
CD300LB|A8K4G0	turquoise	0.616717	-0.0701965	-0.248554	-0.166638	0.252517	0.627025	-0.291918	0.552092	-0.445733	0.382617	0.256896	0.130343	-0.421768	-0.233974	-0.0228173	-0.142188	-0.30178	0.257619	-0.385209	0.0662274	-0.202306	0.134118	-0.309049	0.421661	-0.131284	-0.181417	0.0556113	-0.106797	0.195209	0.0911512	0.245991	M1 turquoise DNA Repair|0.6167
STAB2|Q8WWQ8	turquoise	0.616249	0.0638631	-0.234281	-0.329792	0.561209	0.395634	-0.250468	0.288041	-0.136115	0.308612	0.1374	0.000207609	-0.623847	-0.178772	-0.308068	-0.00673685	-0.266295	0.196371	-0.402031	0.594992	-0.343621	0.222903	0.000327382	0.376424	-0.132963	-0.145067	-0.00740331	-0.0439241	-0.0312607	0.0406648	0.116549	M1 turquoise DNA Repair|0.6162
TMPRSS11A|Q6ZMR5	turquoise	0.615473	0.137956	-0.0366568	-0.178866	0.548976	0.4565	-0.158341	0.256888	-0.234495	0.164453	0.20759	-0.0687973	-0.501044	-0.0795575	-0.208579	0.0101862	-0.246572	0.168956	-0.254389	0.514986	-0.315256	0.227119	0.0316328	0.285473	-0.273107	-0.244342	-0.127125	0.0375325	0.0246991	0.17819	0.105485	M1 turquoise DNA Repair|0.6155
TCTA|P57738	turquoise	0.61509	0.0548883	-0.185794	-0.0813831	0.290472	0.382076	-0.198907	0.358489	-0.156549	0.225793	0.00224511	-0.0402072	-0.560759	-0.182448	-0.42678	-0.155804	-0.142263	0.196802	-0.276083	0.415173	-0.308075	0.218909	-0.248034	0.345369	-0.113065	-0.158036	0.106656	-0.10605	0.0929968	-0.0978073	-0.0257099	M1 turquoise DNA Repair|0.6151
FANCF|Q9NPI8	turquoise	0.608479	0.0242561	-0.226183	-0.143373	0.176907	0.420666	-0.294866	0.57355	-0.204054	0.428615	0.0243342	0.120612	-0.431222	-0.289278	-0.266842	-0.178831	-0.217724	0.322941	-0.201005	0.228227	-0.171396	0.277464	-0.322851	0.417554	-0.150243	-0.196265	0.076705	-0.138837	0.151201	0.0303843	0.0790231	M1 turquoise DNA Repair|0.6085
PKD2|Q13563	turquoise	0.608315	0.138982	-0.0554525	-0.364008	0.376655	0.527389	-0.301639	0.432225	-0.317796	0.599687	0.38862	0.211657	-0.388384	-0.137394	-0.00166791	-0.141447	-0.405614	0.213921	-0.367173	0.365287	-0.137101	0.290931	-0.203843	0.414337	-0.240438	-0.232348	-0.174198	0.000850506	0.0175562	0.183291	0.237458	M1 turquoise DNA Repair|0.6083
IL20|Q9NYY1	turquoise	0.60586	0.125137	-0.0409855	-0.262057	0.287515	0.394097	-0.0838239	0.339692	-0.21993	0.236548	0.126236	-0.0595726	-0.557551	-0.0310652	-0.319536	-0.101525	-0.372069	0.0582879	-0.29927	0.459814	-0.350908	0.219277	-0.340675	0.420699	-0.0818808	-0.138934	0.0388641	0.0786199	0.00960089	0.0550905	0.170079	M1 turquoise DNA Repair|0.6059
OAS1|P00973	turquoise	0.605466	-0.0768086	-0.226985	-0.105946	0.468096	0.380481	-0.0985817	0.308525	-0.191862	0.173666	0.0870589	-0.0728955	-0.636536	-0.100682	-0.411763	-0.101595	-0.223535	0.0399284	-0.414863	0.531538	-0.390202	0.0331791	-0.10079	0.477569	0.0405303	-0.0761426	0.215066	-0.134532	0.174134	0.0367835	0.0225608	M1 turquoise DNA Repair|0.6055
PLA2G16|P53816	turquoise	0.605019	0.197068	-0.141815	-0.3403	0.38249	0.52309	-0.404035	0.432722	-0.240043	0.423553	0.210248	0.142028	-0.295957	-0.360702	0.049569	0.194278	-0.292369	0.503554	-0.156311	0.250665	-0.109309	0.448046	-0.00220473	0.248135	-0.429102	-0.2445	-0.179901	0.0254882	-0.0622655	0.192654	0.190023	M1 turquoise DNA Repair|0.605
ZG16B|Q96DA0	turquoise	0.604307	-0.0798395	-0.276501	-0.0966056	0.251587	0.331151	-0.254309	0.493954	-0.141362	0.422606	0.0791031	0.147136	-0.515975	-0.260568	-0.286287	-0.197329	-0.256132	0.147124	-0.356635	0.404864	-0.14226	0.188245	-0.263069	0.526663	-0.0136785	-0.0853804	0.179857	-0.18267	0.157514	0.128647	0.0700328	M1 turquoise DNA Repair|0.6043
RAET1E|Q8TD07	turquoise	0.602522	0.447302	0.173064	-0.545591	0.475187	0.595173	-0.0544651	0.191721	-0.353162	0.110013	0.359163	-0.258578	-0.525463	-0.110651	-0.15732	-0.00814288	-0.370115	0.174861	-0.207337	0.405227	-0.50057	0.453968	-0.0103658	0.363248	-0.181317	-0.169397	-0.0738845	0.189387	-0.239105	0.6162	0.0985287	M1 turquoise DNA Repair|0.6025
TNMD|Q9H2S6	turquoise	0.601495	0.0804486	-0.218453	-0.20874	0.498419	0.261874	-0.409188	0.439668	0.0539634	0.400101	-0.082498	0.0671548	-0.387748	-0.406431	-0.330833	-0.0835514	0.011065	0.534093	-0.0389735	0.54241	-0.0709658	0.419376	0.154973	0.151924	-0.348781	-0.332892	-0.017426	0.0374586	-0.0469735	0.156509	0.209803	M1 turquoise DNA Repair|0.6015
TERF1|P54274	turquoise	0.601088	0.18676	-0.0881577	-0.138479	0.242533	0.400425	-0.22609	0.518109	-0.192228	0.308398	0.078591	0.00305607	-0.421343	-0.281455	-0.18469	-0.0637425	-0.218934	0.292264	-0.147801	0.278875	-0.199515	0.395652	-0.28901	0.326131	-0.227253	-0.299248	-0.060821	0.0346723	0.018984	0.0321083	0.1889	M1 turquoise DNA Repair|0.6011
LIF|P15018	turquoise	0.598741	-0.000275097	-0.30553	-0.14165	0.426453	0.587424	-0.31801	0.538011	-0.378287	0.299123	0.139248	0.0177249	-0.44446	-0.42533	-0.0993639	-0.284532	-0.150427	0.411008	-0.296926	0.0874303	-0.24349	0.23741	-0.0548559	0.318069	-0.131295	-0.212104	0.197896	-0.0672101	0.137973	-0.0745973	0.227208	M1 turquoise DNA Repair|0.5987
IL24|Q13007	turquoise	0.597451	-0.0338457	-0.266571	-0.24004	0.249897	0.18864	-0.183371	0.350684	0.0449662	0.242717	-0.18318	-0.0296203	-0.586152	-0.183655	-0.594337	-0.0741808	-0.200669	0.168674	-0.187506	0.547737	-0.270274	0.260517	-0.272182	0.430851	-0.0197071	-0.0191576	0.240025	-0.113288	0.0534478	0.0338811	0.00171337	M1 turquoise DNA Repair|0.5975
GZMH|P20718	turquoise	0.597024	-0.0483433	-0.25887	-0.226771	0.472034	0.273442	-0.217058	0.308688	-0.0919572	0.215446	-0.0320126	-0.0242159	-0.542119	-0.161164	-0.438486	-0.0367273	-0.0881878	0.231902	-0.255316	0.549372	-0.285676	0.138436	0.0102639	0.345889	-0.0826553	-0.0715731	0.10585	-0.0889288	0.0679511	-0.052947	0.0872733	M1 turquoise DNA Repair|0.597
CHEK1|O14757	turquoise	0.594685	0.0104775	-0.317722	-0.267412	0.541924	0.258574	-0.332616	0.355174	-0.0338939	0.282855	-0.0829324	0.0226837	-0.557911	-0.2714	-0.451718	-0.11456	-0.0458755	0.298846	-0.220042	0.574219	-0.249287	0.256361	0.0380631	0.29908	-0.174854	-0.175691	0.0737755	-0.0846807	0.0324335	-0.091016	0.103292	M1 turquoise DNA Repair|0.5947
POLR3F|Q9H1D9	turquoise	0.594721	0.147664	-0.236796	-0.315831	0.333032	0.202576	-0.386188	0.424995	0.0806821	0.30969	-0.214655	0.0324098	-0.397442	-0.408932	-0.397347	0.361811	-0.014675	0.524909	0.0619157	0.506052	-0.115575	0.517668	-0.000253018	0.144589	-0.380608	-0.253588	0.00876457	0.0320433	-0.0671604	0.0273169	0.126962	M1 turquoise DNA Repair|0.5947
ADAMTS1|Q9UHI8	turquoise	0.590403	0.148793	-0.0050338	-0.334228	0.153063	0.453688	-0.0554258	0.4092	-0.317595	0.254077	0.190448	-0.0543958	-0.480948	-0.0277245	-0.22229	-0.202602	-0.354421	0.113567	-0.291273	0.188726	-0.313467	0.218225	-0.404668	0.543758	-0.0481965	-0.0152074	0.0429189	-0.0704564	0.0947821	0.109797	0.0307536	M1 turquoise DNA Repair|0.5904
DEFB125|Q8N687	turquoise	0.589755	-0.0509744	-0.18108	-0.0471055	0.514629	0.505803	-0.194064	0.334981	-0.262973	0.365538	0.229729	0.0368258	-0.539898	-0.164738	-0.210756	-0.300102	-0.248715	0.178992	-0.409971	0.459605	-0.294394	0.137547	-0.0339252	0.329244	-0.189754	-0.265489	-0.0112571	-0.0820817	0.133868	0.165827	0.149915	M1 turquoise DNA Repair|0.5898
ABLIM3|O94929	turquoise	0.588324	0.0623267	-0.144954	-0.162584	0.331285	0.432755	-0.144468	0.290923	-0.233373	0.196838	0.129552	-0.09402	-0.534337	-0.132981	-0.351967	-0.17406	-0.296887	0.105632	-0.323857	0.383727	-0.372507	0.184696	-0.225509	0.395067	-0.0628049	-0.06831	0.113384	-0.140033	0.0721673	-0.0201216	-0.0411992	M1 turquoise DNA Repair|0.5883
VCL|P18206	turquoise	0.585835	0.252037	-0.0840743	-0.287796	0.520436	0.60111	-0.246814	0.295495	-0.318627	0.252077	0.306162	-0.0722391	-0.476021	-0.312962	-0.0612341	-0.120911	-0.279036	0.340549	-0.297028	0.309931	-0.348932	0.299913	0.0142955	0.260436	-0.247518	-0.30792	-0.106392	0.0616459	-0.109511	0.285034	0.154082	M1 turquoise DNA Repair|0.5858
TMEM167A|Q8TBQ9	turquoise	0.584626	0.0581548	-0.149821	-0.107461	0.220674	0.560861	-0.220296	0.432497	-0.361535	0.219578	0.221554	0.0190076	-0.371959	-0.263153	-0.032243	0.0593691	-0.287451	0.32071	-0.250478	0.0893482	-0.237573	0.168853	-0.238932	0.280051	-0.182604	-0.208486	0.0281008	-0.00558614	0.114588	0.0381596	0.192747	M1 turquoise DNA Repair|0.5846
PIK3CG|P48736	turquoise	0.583763	-0.0532081	-0.377019	-0.177138	0.573645	0.381459	-0.467259	0.541141	-0.129209	0.496898	0.0830787	0.203182	-0.385115	-0.397859	-0.0726759	-0.0971403	-0.0544477	0.4691	-0.259325	0.367942	-0.0457862	0.244004	0.185436	0.201694	-0.268944	-0.320158	0.00934937	-0.138458	0.103994	0.00119619	0.207927	M1 turquoise DNA Repair|0.5838
SIGLEC8|Q9NYZ4	turquoise	0.583709	0.250257	0.103571	-0.284949	0.395458	0.507156	0.0219019	0.241507	-0.350043	0.231543	0.406239	-0.0982368	-0.539736	-0.00574064	-0.0877184	-0.146061	-0.480893	-0.00101211	-0.438113	0.434744	-0.41089	0.248186	-0.199751	0.492999	-0.0573549	-0.0923992	-0.0509575	0.100243	-0.115449	0.283721	0.143643	M1 turquoise DNA Repair|0.5837
DEFB104A|Q8WTQ1	turquoise	0.582392	-0.205085	-0.383165	0.0567355	0.50755	0.591471	-0.333437	0.541179	-0.431656	0.286462	0.201819	0.115483	-0.463197	-0.248477	-0.102373	-0.444512	-0.0472802	0.234245	-0.464277	0.0965598	-0.195421	-0.0222004	-0.0145166	0.255971	-0.117135	-0.224713	0.12199	-0.212153	0.337381	-0.256356	0.192071	M1 turquoise DNA Repair|0.5824
FUT3|P21217	turquoise	0.581967	-0.114509	-0.281919	-0.111105	0.200353	0.332707	-0.177026	0.33776	-0.0186628	0.219492	-0.112781	-0.0760875	-0.585708	-0.176324	-0.510953	-0.220791	-0.267645	0.169945	-0.287232	0.391975	-0.341153	0.173183	-0.281594	0.423521	-0.0468753	-0.0641055	0.199762	-0.0860902	0.0869718	0.0410893	0.081367	M1 turquoise DNA Repair|0.582
SUN3|Q8TAQ9	turquoise	0.581507	0.273304	-0.0818815	-0.418188	0.485617	0.496914	-0.43787	0.450396	-0.255042	0.435831	0.276733	0.136983	-0.252649	-0.338812	0.111354	0.257519	-0.165125	0.499623	-0.10471	0.305147	-0.0877161	0.447509	0.116995	0.153592	-0.451444	-0.359315	-0.263126	0.071457	-0.11218	0.219897	0.226904	M1 turquoise DNA Repair|0.5815
LEPRE1|Q32P28	turquoise	0.58109	0.0771944	-0.218373	-0.282079	0.568088	0.376724	-0.314458	0.365688	-0.129527	0.198063	-0.0244331	-0.0949477	-0.475207	-0.335724	-0.340853	-0.12593	0.0617284	0.419091	-0.125542	0.39043	-0.262398	0.303158	0.201702	0.190395	-0.198913	-0.192283	0.0733087	-0.0114949	-0.0344424	-0.0392864	0.144523	M1 turquoise DNA Repair|0.5811
NTRK1|P04629	turquoise	0.578582	0.04403	-0.156037	-0.311925	0.411003	0.558665	-0.166524	0.483987	-0.367009	0.312377	0.264568	-0.063253	-0.494458	-0.160486	-0.0982124	-0.260573	-0.326953	0.211342	-0.381868	0.191042	-0.346896	0.185442	-0.121998	0.502486	-0.0821525	-0.204628	0.0842537	0.0179884	0.15245	0.10675	0.347962	M1 turquoise DNA Repair|0.5786
NET1|Q7Z628	turquoise	0.578542	0.0230722	-0.218665	-0.174009	0.460861	0.503029	-0.293207	0.503431	-0.293042	0.375423	0.226407	0.105793	-0.441587	-0.203316	-0.143185	-0.220034	-0.185098	0.218913	-0.363288	0.355713	-0.213234	0.154967	-0.13892	0.285888	-0.193399	-0.266263	-0.0291909	0.0254973	0.104276	-0.0520901	0.309356	M1 turquoise DNA Repair|0.5785
DNAJC11|Q9NVH1	turquoise	0.577181	0.329977	0.138771	-0.413011	0.489174	0.548739	-0.0160532	0.268138	-0.479955	0.085843	0.33763	-0.207145	-0.449791	-0.0928932	-0.0541657	-0.0413399	-0.217549	0.169245	-0.213095	0.227872	-0.393275	0.28897	0.0123678	0.346921	-0.0985648	-0.0907964	0.0210548	0.148764	-0.120992	0.199207	0.13287	M1 turquoise DNA Repair|0.5772
PRSS35|Q8N3Z0	turquoise	0.574943	-0.101379	-0.337995	-0.0341639	0.375772	0.444523	-0.475147	0.569563	-0.186454	0.487878	0.0914616	0.242242	-0.351051	-0.340666	-0.0760202	-0.253494	-0.0984875	0.415037	-0.280822	0.294788	-0.0342599	0.195565	-0.0708019	0.177109	-0.300141	-0.287742	-0.0692873	-0.124117	0.171531	-0.0543351	0.231654	M1 turquoise DNA Repair|0.5749
ACVRL1|P37023	turquoise	0.574067	0.159626	-0.0767534	-0.266193	0.272357	0.531512	-0.110946	0.410291	-0.375785	0.343959	0.349896	0.0155006	-0.441613	-0.242337	-0.0373654	-0.126943	-0.475098	0.192812	-0.323085	0.190919	-0.278455	0.288013	-0.288099	0.504113	-0.0895053	-0.177448	0.0590865	-0.103966	0.0158896	0.197615	0.0570171	M1 turquoise DNA Repair|0.5741
GCH1|P30793	turquoise	0.571959	-0.0470913	-0.248306	-0.168814	0.45412	0.356957	-0.227134	0.339976	-0.0722144	0.218017	-0.0150497	-0.0695919	-0.562873	-0.139756	-0.406867	-0.271771	-0.12471	0.189134	-0.296127	0.511703	-0.307909	0.111969	-0.0848792	0.322661	-0.0860836	-0.10329	0.0988143	-0.142553	0.110119	-0.0402557	0.0493586	M1 turquoise DNA Repair|0.572
RBBP5|Q15291	turquoise	0.568645	0.154204	-0.0718515	-0.349178	0.411224	0.416706	-0.0054224	0.148751	-0.198838	0.0701758	0.140063	-0.212569	-0.651706	-0.0677016	-0.401792	-0.0123117	-0.299792	0.0148829	-0.359484	0.50787	-0.492548	0.19608	-0.159785	0.520116	0.0536143	0.0458366	0.133264	-0.0126966	-0.0911604	0.168151	0.00722602	M1 turquoise DNA Repair|0.5686
PRLR|P16471	turquoise	0.568183	-0.18705	-0.213587	0.00817808	0.364679	0.409454	-0.0947108	0.56813	-0.26175	0.173126	0.0585802	-0.0474506	-0.514547	0.0360384	-0.24277	-0.332891	-0.0616543	0.0765265	-0.387827	0.190902	-0.250688	-0.127011	-0.105029	0.398546	0.0374488	-0.0827488	0.200055	-0.14108	0.482291	-0.151371	0.171188	M1 turquoise DNA Repair|0.5682
TAC3|Q9UHF0	turquoise	0.568132	0.146838	-0.105989	-0.132841	0.390506	0.412655	-0.198933	0.218365	-0.203182	0.180646	0.155153	0.0207654	-0.438897	-0.155854	-0.215648	0.304022	-0.232671	0.200355	-0.22717	0.433045	-0.243816	0.209107	-0.0807339	0.281778	-0.256995	-0.146449	-0.132352	-0.0563335	0.0356402	0.251764	-0.0302088	M1 turquoise DNA Repair|0.5681
LGALS4|P56470	turquoise	0.56759	-0.086234	-0.323216	-0.116799	0.00802385	0.176582	-0.316771	0.52301	0.0846311	0.378973	-0.293824	0.138882	-0.452646	-0.326085	-0.513394	-0.00136667	-0.106787	0.276397	-0.102166	0.350547	-0.0762304	0.284902	-0.413891	0.384929	-0.0974097	-0.144521	0.203152	-0.0942933	0.145493	0.0026254	0.0920717	M1 turquoise DNA Repair|0.5676
LRCH4|O75427	turquoise	0.566589	0.0764302	-0.322239	-0.129315	0.414483	0.380136	-0.612259	0.46249	-0.0189857	0.525262	0.00791724	0.306527	-0.307254	-0.471328	-0.190581	0.112534	0.0130661	0.574935	-0.0801854	0.449764	0.0588881	0.438823	0.00916807	0.0649851	-0.544019	-0.428173	-0.246424	-0.024636	-0.014533	-0.0666768	0.177617	M1 turquoise DNA Repair|0.5666
TRDMT1|O14717	turquoise	0.565611	0.016194	-0.223327	-0.139259	0.255489	0.476563	-0.222116	0.505496	-0.279645	0.211161	0.0917085	-0.0513575	-0.394945	-0.29527	-0.150108	-0.202399	-0.219747	0.311989	-0.174057	0.130368	-0.25638	0.243717	-0.222091	0.289747	-0.142775	-0.270288	0.115816	-0.0863701	0.128444	-0.0390695	0.162208	M1 turquoise DNA Repair|0.5656
STC2|O76061	turquoise	0.564198	-0.0171706	-0.232787	-0.141489	0.507905	0.344164	-0.391161	0.389033	-0.0106647	0.358795	0.0389258	0.140847	-0.422026	-0.209102	-0.260082	-0.120048	-0.0041178	0.288456	-0.255531	0.519545	-0.0663357	0.160006	0.0990473	0.198839	-0.251577	-0.271552	-0.0753554	-0.0310486	0.0909886	0.18874	0.200227	M1 turquoise DNA Repair|0.5642
RORC|P51449	turquoise	0.563731	-0.026266	-0.291495	-0.0972427	0.303236	0.537794	-0.468971	0.496543	-0.276289	0.436924	0.154268	0.266932	-0.311004	-0.347852	0.0298	-0.0447717	-0.154516	0.430852	-0.258754	0.124739	-0.0387117	0.174157	-0.112514	0.17454	-0.318481	-0.27366	-0.0890953	-0.0875171	0.110783	0.00357831	0.147212	M1 turquoise DNA Repair|0.5637
HTN3|P15516	turquoise	0.56281	-0.137287	-0.254105	-0.0722175	0.355732	0.385341	-0.195709	0.402163	-0.221365	0.418027	0.205656	0.142004	-0.559595	-0.0925614	-0.21125	-0.187313	-0.335734	0.0430093	-0.516622	0.384689	-0.217943	0.0401035	-0.186619	0.563651	0.00752786	-0.077109	0.0913071	-0.276875	0.238125	0.153167	0.0186729	M1 turquoise DNA Repair|0.5628
TMEM57|Q8N5G2	turquoise	0.56275	0.255871	0.0981192	-0.357732	0.205895	0.522409	-0.0128746	0.222664	-0.374184	0.186433	0.304035	-0.0647735	-0.447026	0.0353571	-0.0472269	0.204198	-0.515014	0.0221738	-0.285488	0.238028	-0.366265	0.265762	-0.309949	0.421709	-0.160676	-0.0581442	-0.128681	0.126024	-0.104495	0.190251	0.0903569	M1 turquoise DNA Repair|0.5628
IL2|P60568	turquoise	0.562188	-0.14202	-0.286954	0.0109017	0.35254	0.229623	-0.168475	0.358839	-0.0276055	0.212532	-0.172788	-0.0361734	-0.577255	-0.145786	-0.538809	-0.358717	-0.0569444	0.157492	-0.260282	0.463092	-0.273699	0.0955717	-0.119281	0.371896	-0.0209387	-0.122542	0.207678	-0.101989	0.19907	-0.0728846	0.0779817	M1 turquoise DNA Repair|0.5622
VSTM4|Q8IW00	turquoise	0.558705	0.21556	-0.0312512	-0.346877	0.511181	0.409554	-0.200004	0.260007	-0.182666	0.209155	0.116705	-0.0671176	-0.402498	-0.155898	-0.198799	0.0322356	-0.116635	0.311356	-0.124299	0.381316	-0.255579	0.284005	0.131382	0.236732	-0.209308	-0.13524	-0.0607968	0.0320727	-0.0750396	0.142058	0.0118996	M1 turquoise DNA Repair|0.5587
IL36B|Q9NZH7	turquoise	0.557583	-0.196377	-0.41032	0.21667	0.456661	0.380123	-0.333483	0.431401	-0.124725	0.257287	-0.0199018	0.0962557	-0.482255	-0.297809	-0.323786	-0.244781	-0.0384924	0.266295	-0.367598	0.349018	-0.158426	0.0568307	0.0389369	0.242871	-0.200073	-0.315476	0.0746518	-0.138227	0.249883	-0.00019318	0.158934	M1 turquoise DNA Repair|0.5576
CHEK2|O96017	turquoise	0.55371	0.141275	-0.0858302	-0.261982	0.231106	0.512466	-0.167039	0.404118	-0.37698	0.165037	0.194378	-0.0138449	-0.40106	-0.120519	-0.095929	-0.0930553	-0.211796	0.162696	-0.204358	0.0899524	-0.240589	0.218802	-0.192486	0.320197	-0.0759964	-0.0702839	0.0630968	-0.000615556	0.0710708	0.0597046	0.105353	M1 turquoise DNA Repair|0.5537
SF3B4|Q15427	turquoise	0.549993	0.110199	-0.140785	-0.274007	0.15538	0.395197	-0.255768	0.450128	-0.201492	0.323955	0.0797487	0.0656426	-0.387149	-0.232368	-0.184591	0.195165	-0.260726	0.259121	-0.156384	0.205594	-0.189255	0.339063	-0.306924	0.3597	-0.233323	-0.173872	-0.0433732	-0.0114715	0.0423419	0.0250435	0.146462	M1 turquoise DNA Repair|0.55
TNFSF9|P41273	turquoise	0.549402	-0.0930168	-0.309772	0.00866632	0.0334056	0.250056	-0.34518	0.557803	-0.035786	0.471134	-0.161775	0.235963	-0.371619	-0.325422	-0.300208	-0.115666	-0.18641	0.301639	-0.148153	0.2343	-0.0233055	0.264662	-0.407229	0.41993	-0.0975336	-0.246221	0.115484	-0.157204	0.171994	0.0248847	0.0809965	M1 turquoise DNA Repair|0.5494
SPTAN1|Q13813	turquoise	0.549083	0.0766264	-0.00589019	-0.309394	0.423902	0.404919	0.0165633	0.177902	-0.288364	0.123043	0.156901	-0.145831	-0.541366	0.0211124	-0.317452	-0.0659898	-0.253134	0.0419785	-0.293363	0.371751	-0.395439	0.134278	-0.0800111	0.479708	0.0406235	0.0470044	0.119587	-0.0126811	0.0429785	0.118865	0.0561698	M1 turquoise DNA Repair|0.5491
CCNC|P24863	turquoise	0.54815	0.130726	-0.00404619	-0.210262	0.301567	0.569357	-0.131497	0.407838	-0.387868	0.324032	0.405212	0.0601969	-0.406924	-0.0835624	0.0728476	-0.0757301	-0.431116	0.102788	-0.397148	0.167428	-0.234569	0.195241	-0.217477	0.481603	-0.126323	-0.206105	-0.0816932	0.040586	0.0376552	0.241323	0.253132	M1 turquoise DNA Repair|0.5481
DPP10|Q8N608	turquoise	0.547686	0.201207	-0.174753	-0.366653	0.367303	0.346687	-0.312884	0.45828	-0.130267	0.164814	-0.089808	-0.128279	-0.368967	-0.458487	-0.253256	0.0153358	0.0320712	0.521221	0.0547342	0.206334	-0.220764	0.488383	0.0731376	0.176085	-0.244168	-0.203595	0.117523	0.217252	-0.106686	-0.00561926	0.332292	M1 turquoise DNA Repair|0.5477
LHCGR|P22888	turquoise	0.545856	-0.0564886	-0.263876	-0.0381927	0.220474	0.421189	-0.250935	0.354264	-0.183909	0.377715	0.111248	0.182377	-0.432556	-0.184832	-0.206238	-0.200621	-0.243094	0.226917	-0.359842	0.278084	-0.129684	0.137915	-0.234706	0.41103	-0.0781891	-0.148471	0.0524125	-0.143003	0.163431	0.0184408	0.0929577	M1 turquoise DNA Repair|0.5459
ERCC4|Q92889	turquoise	0.545281	0.104158	-0.104745	-0.283039	0.0579998	0.334651	-0.221796	0.457338	-0.143426	0.264161	-0.0795571	0.0212076	-0.336754	-0.219134	-0.266358	0.0072647	-0.123051	0.281953	-0.00255305	0.150239	-0.124844	0.385316	-0.343557	0.269098	-0.121647	-0.124325	0.120557	0.0489954	0.0420014	0.0162055	0.131872	M1 turquoise DNA Repair|0.5453
SPSB1|Q96BD6	turquoise	0.544999	0.00793668	-0.350714	-0.141452	0.560391	0.251569	-0.425728	0.482492	0.0151522	0.293364	-0.155224	0.0474749	-0.41717	-0.393488	-0.324121	-0.248245	0.148347	0.474698	-0.11499	0.445757	-0.11119	0.258279	0.217736	0.0930501	-0.259787	-0.312456	0.0318571	-0.0343463	0.0843807	-0.034596	0.218035	M1 turquoise DNA Repair|0.545
ARMC5|Q96C12	turquoise	0.544857	0.175029	-0.0971284	-0.326542	0.393043	0.458471	-0.279311	0.427413	-0.211712	0.272372	0.165277	-0.0168715	-0.305925	-0.341726	0.00831476	0.0180386	-0.174283	0.485495	-0.102859	0.240072	-0.197905	0.363673	0.119468	0.18682	-0.287393	-0.28798	-0.0104147	0.0512515	-0.0438089	0.475337	0.199759	M1 turquoise DNA Repair|0.5449
KLK4|Q9Y5K2	turquoise	0.542563	-0.0952156	-0.189895	-0.118435	0.247156	0.548646	-0.139578	0.543665	-0.490267	0.392602	0.302193	0.0691023	-0.41362	-0.156109	-0.00329823	-0.387443	-0.344841	0.159818	-0.439761	-0.0161911	-0.227792	0.0769332	-0.222696	0.532198	-0.0166518	-0.105846	0.157955	-0.205456	0.267366	0.0563357	0.13767	M1 turquoise DNA Repair|0.5426
PLA1A|Q53H76	turquoise	0.542644	0.107377	-0.0997551	-0.229615	0.569507	0.531589	-0.147907	0.255482	-0.320116	0.128411	0.285419	-0.145804	-0.476295	-0.125437	-0.121949	-0.103257	-0.233547	0.172296	-0.329582	0.293801	-0.396848	0.155939	0.118377	0.28304	-0.156958	-0.223794	-0.0082477	0.010683	0.00125333	0.0984811	0.118044	M1 turquoise DNA Repair|0.5426
OSTN|P61366	turquoise	0.540722	0.455047	0.139637	-0.433778	0.439362	0.420749	-0.125927	0.256855	-0.227333	0.0824447	0.154119	-0.195135	-0.389546	-0.140306	-0.174905	0.00741755	-0.176716	0.254543	-0.0395216	0.364232	-0.337283	0.471802	0.038235	0.207042	-0.221571	-0.202944	-0.0686587	0.17545	-0.19238	0.171313	0.068499	M1 turquoise DNA Repair|0.5407
C6orf58|Q6P5S2	turquoise	0.538494	0.000329844	-0.187292	-0.148149	0.193565	0.27911	-0.167673	0.411839	-0.0917387	0.338066	0.0115663	0.0694566	-0.513173	-0.188107	-0.307379	-0.180904	-0.253945	0.090807	-0.337065	0.357702	-0.188316	0.223008	-0.282007	0.538716	0.0469639	-0.0371054	0.176323	-0.0725152	0.0775345	0.182637	0.118031	M1 turquoise DNA Repair|0.5385
GPR142|Q7Z601	turquoise	0.538476	0.0215574	-0.145457	-0.110649	0.100478	0.237373	-0.188779	0.364877	-0.0406994	0.247598	-0.157506	0.04776	-0.390634	-0.211627	-0.3915	-0.03397	-0.115766	0.225019	-0.0646538	0.313487	-0.13103	0.299344	-0.261439	0.298097	-0.129725	-0.149606	0.0996077	0.0695215	0.0405799	0.00626442	0.165207	M1 turquoise DNA Repair|0.5385
TK1|P04183	turquoise	0.53713	-0.105427	-0.422653	-0.0412767	0.449582	0.245425	-0.449448	0.516966	-0.0117264	0.409282	-0.109361	0.136923	-0.43921	-0.455953	-0.318196	-0.228508	0.0516307	0.454063	-0.185462	0.414605	-0.100614	0.230093	0.0631767	0.168879	-0.231035	-0.3176	0.100332	-0.148868	0.130241	-0.0630508	0.184328	M1 turquoise DNA Repair|0.5371
PDGFB|P01127	turquoise	0.535841	-0.00240159	-0.21314	-0.239638	0.211872	0.281695	-0.158692	0.421613	-0.122361	0.193731	-0.102908	-0.0209463	-0.47846	-0.0970986	-0.353454	-0.154427	-0.107317	0.150364	-0.214673	0.244315	-0.21988	0.166916	-0.207212	0.393924	0.00754438	-0.0136568	0.224266	-0.0814175	0.161255	-0.0111818	0.0871239	M1 turquoise DNA Repair|0.5358
RNF148|Q8N7C7	turquoise	0.535151	0.151464	-0.167946	-0.303223	0.223364	0.367166	-0.385488	0.548532	-0.160254	0.366838	0.0152097	0.0969277	-0.240465	-0.396284	-0.0445525	0.299609	-0.102567	0.493893	-0.0108781	0.140244	-0.0487721	0.427948	-0.0951252	0.178521	-0.367663	-0.258991	-0.0663294	0.00742021	0.0166287	0.0757216	0.230615	M1 turquoise DNA Repair|0.5352
BMP4|P12644	turquoise	0.534472	0.0270867	-0.323401	-0.0780274	0.566328	0.239682	-0.487018	0.4386	0.0464991	0.373796	-0.0942804	0.133962	-0.304057	-0.446703	-0.191204	0.161316	0.0865922	0.571874	-0.0166707	0.522395	-0.00500413	0.387242	0.278696	0.019456	-0.468667	-0.443549	-0.145974	-0.0441103	0.0739214	0.0596919	0.175841	M1 turquoise DNA Repair|0.5345
CD1D|P15813	turquoise	0.531075	-0.088875	-0.24226	0.000875282	0.211458	0.235582	-0.151847	0.35811	0.000865223	0.264755	-0.123415	0.0408202	-0.519096	-0.169391	-0.474341	-0.211746	-0.100522	0.157946	-0.250187	0.429033	-0.201579	0.175641	-0.206932	0.388583	-0.0583488	-0.144669	0.134627	-0.0817865	0.125106	0.0620985	0.0692087	M1 turquoise DNA Repair|0.5311
IFNW1|P05000	turquoise	0.531064	0.192794	0.0218868	-0.275232	0.352733	0.363111	-0.163267	0.196288	-0.0879875	0.335975	0.170193	0.03227	-0.405864	-0.109142	-0.158022	0.0475071	-0.401391	0.241331	-0.199981	0.457044	-0.243469	0.339999	-0.0407226	0.270701	-0.295782	-0.171237	-0.213343	0.189777	-0.173833	0.195716	0.228654	M1 turquoise DNA Repair|0.5311
BRPF1|P55201	turquoise	0.530983	0.153994	0.0241387	-0.243351	0.385199	0.413423	0.0624303	0.212373	-0.248403	0.107384	0.280154	-0.17268	-0.623282	0.0903101	-0.253458	-0.219792	-0.407542	-0.104929	-0.467338	0.423944	-0.457256	0.111777	-0.181704	0.558758	0.0390421	-0.00952025	0.0139792	-0.065987	0.0183153	0.241264	0.0342095	M1 turquoise DNA Repair|0.531
COL8A1|P27658	turquoise	0.524423	0.0693133	-0.191633	-0.0846132	0.459139	0.528937	-0.314799	0.417643	-0.301143	0.249873	0.199697	0.023009	-0.385776	-0.29491	-0.0224359	-0.134593	-0.107475	0.326648	-0.26034	0.208617	-0.230736	0.178673	-0.0088141	0.155196	-0.175378	-0.206742	0.0332687	-0.0809832	0.112387	0.0378134	0.0845852	M1 turquoise DNA Repair|0.5244
TMEM167B|Q9NRX6	turquoise	0.523155	0.163855	0.0286548	-0.278487	0.43798	0.520431	-0.0346215	0.130314	-0.288667	0.142051	0.338873	-0.111432	-0.506575	-0.0603019	-0.137557	-0.0550977	-0.39528	0.0929541	-0.37893	0.391028	-0.405562	0.143464	-0.0813764	0.349681	-0.156781	-0.140222	-0.0764523	0.0797392	-0.0792427	0.286505	0.128778	M1 turquoise DNA Repair|0.5232
LGR5|O75473	turquoise	0.523089	0.0778207	-0.106867	-0.174194	0.248782	0.355419	-0.196901	0.416407	-0.222632	0.134385	-0.00719653	-0.0722739	-0.32602	-0.25244	-0.162747	0.107714	-0.0333877	0.288489	-0.0895322	0.126382	-0.215847	0.241276	-0.0805874	0.219081	-0.11991	-0.151469	0.128384	0.0508899	0.0258469	-0.0206436	0.173905	M1 turquoise DNA Repair|0.5231
AZU1|P20160	turquoise	0.522458	-0.275601	-0.433799	0.0523988	0.181596	0.366182	-0.196695	0.415458	-0.183927	0.276514	-0.0418684	0.102525	-0.550882	-0.158848	-0.328822	-0.375164	-0.159146	0.0862269	-0.469652	0.131462	-0.203533	-0.0146601	-0.234248	0.537919	0.132302	-0.0472746	0.358047	-0.235921	0.322099	-0.119322	0.0619593	M1 turquoise DNA Repair|0.5225
ADAMTS15|Q8TE58	turquoise	0.521594	0.186205	0.103762	-0.277167	0.215944	0.445696	0.0857874	0.308708	-0.368992	-0.00831744	0.13959	-0.256176	-0.488582	0.0845772	-0.253037	-0.146971	-0.207069	-0.00113785	-0.23152	0.11207	-0.429732	0.0824237	-0.288503	0.426725	0.0915761	0.0541305	0.131154	-0.0263054	0.0949685	0.033693	-0.0537194	M1 turquoise DNA Repair|0.5216
DLX3|O60479	turquoise	0.520946	0.157667	0.00624997	-0.257596	0.147249	0.464091	-0.0671516	0.358246	-0.354205	0.270513	0.304415	-0.0333838	-0.393581	-0.0636594	-0.0553173	0.0525998	-0.482906	0.0544458	-0.326709	0.140065	-0.331991	0.18568	-0.397319	0.452232	-0.0914109	-0.100569	-0.0720257	-0.042271	0.0366373	0.104582	0.06289	M1 turquoise DNA Repair|0.5209
CANX|P27824	turquoise	0.514995	0.0853534	-0.0815423	-0.198893	0.277935	0.341898	-0.0447434	0.205008	-0.15612	0.0823873	0.0905042	-0.103081	-0.511954	-0.0459183	-0.34463	0.0310113	-0.311582	0.0538167	-0.239207	0.399923	-0.35299	0.110758	-0.167898	0.323729	-0.137467	-0.0508394	-0.00368408	0.0677048	0.0223594	0.0189081	0.13105	M1 turquoise DNA Repair|0.515
SGK3|Q96BR1	turquoise	0.514091	0.209739	-0.204561	-0.324343	0.333814	0.236762	-0.457104	0.380328	0.0101128	0.267551	-0.140834	0.0898769	-0.262194	-0.452282	-0.280412	0.480439	0.0977801	0.568592	0.13383	0.380404	-0.0355745	0.476712	0.0807395	0.0492526	-0.439166	-0.274855	-0.0949506	0.0585047	-0.0710045	0.0295893	0.116057	M1 turquoise DNA Repair|0.5141
MTFR1|Q15390	turquoise	0.513192	-0.0031407	-0.224787	-0.0761208	0.0577965	0.145552	-0.178859	0.362859	0.093843	0.259044	-0.273977	-0.0229274	-0.462237	-0.250768	-0.488146	-0.0695134	-0.232799	0.259708	-0.0651349	0.37179	-0.208547	0.333078	-0.346604	0.376655	-0.116895	-0.130237	0.13996	-0.140711	0.0529994	0.0110115	-0.042908	M1 turquoise DNA Repair|0.5132
CD4|P01730	turquoise	0.510539	0.0427888	-0.165134	-0.131818	0.306893	0.243384	-0.125932	0.316205	0.00455032	0.172812	-0.112772	-0.147255	-0.478044	-0.214165	-0.416189	-0.163943	-0.14793	0.303692	-0.130579	0.404861	-0.293763	0.29365	-0.0535662	0.243059	-0.192681	-0.215309	0.12141	-0.0289721	0.0480792	-0.0564926	0.0934706	M1 turquoise DNA Repair|0.5105
IL21R|Q9HBE5	turquoise	0.507563	-0.117272	-0.323563	-0.279413	0.439007	0.244362	-0.170679	0.246206	-0.04946	0.162741	-0.0602412	-0.0278135	-0.55487	-0.0726074	-0.470408	0.0385783	-0.0523466	0.0980192	-0.331253	0.460135	-0.27406	0.0246488	0.0308988	0.452247	0.109614	0.189886	0.263716	-0.299069	0.184836	-0.0655792	-0.111436	M1 turquoise DNA Repair|0.5076
NCR2|O95944	turquoise	0.504587	0.0384382	-0.111217	-0.191246	0.0688984	0.225288	-0.1284	0.314354	-0.0432884	0.284771	-0.0856621	0.0467978	-0.413366	-0.107521	-0.346474	-0.0732779	-0.329883	0.101568	-0.148409	0.323334	-0.166287	0.281115	-0.347903	0.447478	-0.0657949	-0.0632011	0.0522206	0.00844471	-0.00322967	0.0541154	0.116225	M1 turquoise DNA Repair|0.5046
CFHR4|Q92496	turquoise	0.50232	-0.155941	-0.294044	-0.0354476	0.294488	0.482555	-0.198658	0.395147	-0.350509	0.171148	0.157012	0.0694707	-0.524415	-0.0731807	-0.316028	-0.370019	0.021336	-0.0215025	-0.443219	0.160802	-0.24559	-0.107033	-0.272643	0.364481	0.00149733	-0.127707	0.0910388	-0.0947005	0.288366	-0.225521	0.203674	M1 turquoise DNA Repair|0.5023
PIN1|Q13526	turquoise	0.502093	0.242736	-0.0224478	-0.444464	0.392122	0.250269	-0.0929962	0.276618	-0.0233331	0.0961775	-0.0427711	-0.19098	-0.428356	-0.233519	-0.348415	0.059677	-0.172957	0.281605	-0.0297536	0.449019	-0.31865	0.340584	0.0243042	0.276854	-0.0568989	-0.0422481	0.244387	0.0220238	-0.10239	0.125416	0.021757	M1 turquoise DNA Repair|0.5021
TNFSF18|Q9UNG2	turquoise	0.500674	0.174818	-0.014666	-0.103271	0.246129	0.418488	-0.0982953	0.117787	-0.172647	0.278702	0.256188	0.0112411	-0.416658	-0.123361	-0.139607	0.0503746	-0.496941	0.143273	-0.231783	0.429126	-0.28986	0.332489	-0.208498	0.325231	-0.319911	-0.273636	-0.217635	-0.0342915	-0.120773	0.343271	-0.0344445	M1 turquoise DNA Repair|0.5007
ZNRF3|Q9ULT6	turquoise	0.497106	0.146855	-0.136732	-0.329918	0.267417	0.309262	-0.361457	0.303761	-0.0905522	0.367237	0.0880645	0.128554	-0.30123	-0.270819	-0.164139	0.273309	-0.207556	0.293458	-0.0881741	0.381481	-0.128487	0.3113	-0.130778	0.150955	-0.356427	-0.235941	-0.207783	0.00161312	-0.0540687	0.0828142	0.0953561	M1 turquoise DNA Repair|0.4971
SLC26A7|Q8TE54	turquoise	0.49664	0.168181	-0.119615	-0.364778	0.343039	0.27107	-0.228916	0.419995	-0.0988593	0.194509	-0.106494	-0.122963	-0.336825	-0.27767	-0.246182	-0.0351663	0.0128361	0.412803	-0.0189258	0.21518	-0.204212	0.350974	0.0798658	0.194562	-0.106391	-0.0549329	0.186593	0.0460161	-0.0511921	-0.0789188	0.0963125	M1 turquoise DNA Repair|0.4966
PDE7A|Q13946	turquoise	0.492307	0.0393441	-0.203404	-0.138285	0.122118	0.0889443	-0.217189	0.263211	0.186085	0.21806	-0.258826	0.0161414	-0.4279	-0.297459	-0.506075	-0.0355143	-0.150019	0.276857	0.00264997	0.488535	-0.119521	0.364891	-0.190253	0.275751	-0.18848	-0.145218	0.136305	-0.021043	-0.0534495	0.0577797	0.0176184	M1 turquoise DNA Repair|0.4923
VPS4A|Q9UN37	turquoise	0.488931	0.345031	0.0565107	-0.553575	0.276056	0.363529	0.0548848	0.108882	-0.132425	0.135344	0.173643	-0.207467	-0.492918	-0.14129	-0.246859	0.122363	-0.455869	0.144736	-0.193553	0.457477	-0.436563	0.434782	-0.144668	0.451342	-0.0198897	0.0396828	0.182174	-0.0208444	-0.227541	0.394898	-0.106119	M1 turquoise DNA Repair|0.4889
MEP1B|Q16820	turquoise	0.483709	-0.0955793	-0.368551	-0.121886	0.408958	0.274075	-0.379779	0.447779	-0.0144657	0.318097	-0.113125	0.0929851	-0.321807	-0.395684	-0.24892	-0.087612	0.0592495	0.481236	-0.113781	0.287508	-0.0527975	0.217748	0.163813	0.12668	-0.177579	-0.192311	0.184572	-0.182484	0.164012	-0.00062482	0.055274	M1 turquoise DNA Repair|0.4837
SBSN|Q6UWP8	turquoise	0.47977	0.204754	0.0657558	-0.165017	0.130201	0.350827	0.0343477	0.122619	-0.13472	0.275403	0.2283	-0.0299947	-0.534389	-0.0311251	-0.295436	-0.0913359	-0.552654	-0.0620755	-0.318585	0.5091	-0.361446	0.253209	-0.478804	0.492699	-0.0903701	-0.145542	-0.1002	-0.0169506	-0.124536	0.19103	-0.0646119	M1 turquoise DNA Repair|0.4798
PCNA|P12004	turquoise	0.478899	0.128591	-0.0536486	-0.222292	0.156705	0.427645	-0.135841	0.250811	-0.253725	0.24053	0.172741	-0.0288157	-0.347155	-0.16785	-0.095622	-0.0634461	-0.277343	0.22577	-0.178642	0.168598	-0.253764	0.284346	-0.196362	0.260628	-0.163615	-0.172439	0.00479657	0.0495311	-0.0739976	0.0482214	0.142643	M1 turquoise DNA Repair|0.4789
TLR1|Q15399	turquoise	0.477423	0.40059	0.193475	-0.320325	0.422423	0.431149	0.0746451	0.0783743	-0.216508	-0.101166	0.251558	-0.405344	-0.48872	-0.027214	-0.208816	0.0817241	-0.270323	0.0906615	-0.148198	0.46228	-0.556147	0.304858	0.00111667	0.191465	-0.145315	-0.13448	-0.0841421	0.196678	-0.224359	0.434182	0.0191638	M1 turquoise DNA Repair|0.4774
ZHX1|Q9UKY1	turquoise	0.477408	-0.00214575	-0.220611	-0.141106	0.38292	0.325971	-0.179423	0.310719	-0.205478	0.158058	0.0360007	-0.0437758	-0.434274	-0.251937	-0.257628	-0.155335	-0.0467596	0.216016	-0.184448	0.309991	-0.258826	0.170695	0.017489	0.27351	-0.10253	-0.152179	0.13966	-0.128941	0.0779632	0.026997	0.0294168	M1 turquoise DNA Repair|0.4774
FCRL3|Q96P31	turquoise	0.476878	0.0592177	-0.166191	-0.227223	0.209597	0.246505	-0.150496	0.265138	-0.0245383	0.176471	-0.0705154	-0.0409133	-0.440894	-0.0925701	-0.375778	0.0805686	-0.198472	0.162598	-0.152686	0.361528	-0.242044	0.218154	-0.197907	0.273122	-0.126187	-0.0366445	0.0298415	-0.100866	0.0590489	-0.0373132	-0.0597064	M1 turquoise DNA Repair|0.4769
TMUB2|Q71RG4	turquoise	0.476139	0.156136	0.0646598	-0.188859	0.239861	0.379499	0.0258345	0.121731	-0.208076	0.0564398	0.175733	-0.139304	-0.452636	0.108927	-0.20765	-0.00800705	-0.281734	-0.00167814	-0.255402	0.315315	-0.361622	0.0588703	-0.195292	0.285265	-0.0273594	0.105797	-0.0372795	-0.00931184	-0.00726273	0.124464	-0.0925611	M1 turquoise DNA Repair|0.4761
DNAJB6|O75190	turquoise	0.471594	0.320448	0.239166	-0.417055	0.225232	0.461494	0.271657	0.039263	-0.325812	-0.0980124	0.264496	-0.425375	-0.538851	0.228694	-0.27512	-0.0355583	-0.444392	-0.160854	-0.277213	0.268573	-0.634858	0.199838	-0.27874	0.468701	0.130785	0.183686	0.113013	0.0432749	-0.103409	0.104491	-0.164727	M1 turquoise DNA Repair|0.4716
IDE|P14735	turquoise	0.470695	-0.077414	-0.314106	-0.138423	0.318354	0.364773	-0.241586	0.30111	-0.141351	0.317995	0.139327	0.139793	-0.459052	-0.152724	-0.119768	-0.129561	-0.257029	0.106288	-0.432928	0.289682	-0.171787	0.0826966	-0.122757	0.418329	0.0639121	-0.0509382	0.188228	-0.169946	0.0670497	0.0300467	0.0586298	M1 turquoise DNA Repair|0.4707
MICU3|Q86XE3	turquoise	0.469767	-0.0562111	-0.279985	-0.0585043	0.36554	0.182312	-0.246309	0.286716	0.0328504	0.171503	-0.153746	0.00567882	-0.420958	-0.321432	-0.394885	-0.125955	-0.00897918	0.288289	-0.121144	0.441821	-0.160715	0.188458	0.0604722	0.154231	-0.116176	-0.147204	0.156773	-0.115387	0.00677882	-0.0626421	0.0154608	M1 turquoise DNA Repair|0.4698
FGF20|Q9NP95	turquoise	0.469289	0.0748847	0.0309099	-0.255396	0.234503	0.437612	0.100983	0.182111	-0.306924	-0.0273997	0.163387	-0.2248	-0.469731	0.119376	-0.215311	-0.240327	-0.298992	-0.0992683	-0.280909	0.123985	-0.417801	-0.0365335	-0.170308	0.409265	0.153654	0.110199	0.212512	0.00178965	0.121856	0.0704556	0.00366653	M1 turquoise DNA Repair|0.4693
VEGFB|P49765	turquoise	0.469243	-0.263355	-0.319458	0.109749	0.324125	0.377855	-0.236328	0.447556	-0.199256	0.318667	0.0871155	0.179312	-0.358979	-0.01265	-0.160739	-0.277839	-0.0322061	0.14567	-0.353952	0.225202	-0.0591564	-0.0866649	-0.0722553	0.282643	-0.141573	-0.16904	0.0354109	-0.340469	0.482968	-0.107293	0.00440426	M1 turquoise DNA Repair|0.4692
GRAMD1C|Q8IYS0	turquoise	0.462923	0.149844	-0.0877133	-0.145736	0.0197129	0.204509	-0.215737	0.488906	-0.00627498	0.337	-0.105773	0.0500793	-0.252562	-0.356847	-0.203848	-0.0434498	-0.166259	0.356479	0.0572509	0.17858	-0.0620447	0.461891	-0.292192	0.306096	-0.1222	-0.266302	0.10541	0.094818	-0.0406897	0.0903552	0.196264	M1 turquoise DNA Repair|0.4629
FLT3LG|P49771	turquoise	0.461531	0.396966	0.054483	-0.410726	0.438896	0.320472	-0.261609	0.249598	-0.0526941	0.10422	0.0427805	-0.103586	-0.25435	-0.273273	-0.149967	0.147901	0.0613017	0.417632	0.136307	0.404104	-0.150562	0.520623	0.206727	0.0383147	-0.394451	-0.289583	-0.175391	0.235999	-0.237332	0.370344	0.131383	M1 turquoise DNA Repair|0.4615
ACAP2|Q15057	turquoise	0.457884	-0.096778	-0.272463	-0.108498	0.0734182	0.0538388	-0.185064	0.505981	0.0753329	0.39774	-0.238004	0.0895247	-0.355247	-0.305543	-0.420124	-0.0788212	-0.0908059	0.264543	-0.0829807	0.366026	-0.0893851	0.277539	-0.293732	0.352259	0.0235978	-0.0962265	0.311719	-0.137714	0.143377	-0.0808975	0.0981542	M1 turquoise DNA Repair|0.4579
GJA8|P48165	turquoise	0.457011	0.281718	0.134131	-0.313396	0.0403843	0.242298	-0.00546239	0.183575	-0.0827698	0.177315	0.0277237	-0.12116	-0.396772	-0.0561983	-0.32369	-0.0596928	-0.322649	0.0937243	-0.0608567	0.317687	-0.272185	0.406272	-0.341657	0.400906	-0.0706394	-0.0427101	-0.00416516	0.0862586	-0.17031	0.285062	-0.0249464	M1 turquoise DNA Repair|0.457
LACRT|Q9GZZ8	turquoise	0.456818	-0.0874918	-0.360389	-0.0950038	0.189786	0.172496	-0.366565	0.44303	0.0918926	0.364798	-0.162752	0.175723	-0.360919	-0.386782	-0.286889	-0.0346254	-0.067803	0.306061	-0.186039	0.334965	-0.00351882	0.257539	-0.122116	0.329429	-0.096568	-0.0993148	0.159224	-0.131888	0.09203	0.114493	0.101455	M1 turquoise DNA Repair|0.4568
CD200R1|Q8TD46	turquoise	0.45669	0.12007	0.0821181	-0.132917	0.136229	0.323875	0.0338704	0.0680925	-0.106133	0.102326	0.105565	-0.136489	-0.449166	0.0950948	-0.298169	-0.0774282	-0.376731	-0.074514	-0.230153	0.398052	-0.36027	0.13187	-0.288954	0.337067	-0.0883362	-0.030136	-0.10218	0.0598553	-0.0241969	0.197324	-0.0458899	M1 turquoise DNA Repair|0.4567
IL31|Q6EBC2	turquoise	0.453485	-0.0334347	-0.166347	-0.00729739	0.0951915	0.207635	-0.135211	0.27309	-0.00203669	0.206976	-0.0894004	0.0136918	-0.385485	-0.155121	-0.298222	-0.0950174	-0.207041	0.132844	-0.151979	0.319624	-0.167806	0.175859	-0.286449	0.249988	-0.0542768	-0.117396	0.074119	-0.0259241	0.0158678	-0.0315323	0.0502421	M1 turquoise DNA Repair|0.4535
IL18RAP|O95256	turquoise	0.451318	0.153612	-0.0113992	-0.164605	0.0763707	0.159279	-0.00209209	0.163134	0.0572935	0.0688045	-0.154205	-0.158341	-0.450224	-0.149323	-0.436563	-0.114979	-0.237608	0.138108	-0.0279527	0.406492	-0.279249	0.305234	-0.293061	0.278878	-0.0516254	-0.0744911	0.13453	0.0503919	-0.100228	0.11488	-0.0263891	M1 turquoise DNA Repair|0.4513
GIP|P09681	turquoise	0.431645	0.201573	0.0730177	-0.208932	0.208452	0.454552	-0.0852794	0.202757	-0.265168	0.218667	0.29351	-0.0344483	-0.386759	-0.0349694	-0.0737617	-0.100565	-0.370456	-0.00538065	-0.280903	0.233267	-0.291755	0.229819	-0.26357	0.313126	-0.0973715	-0.140962	-0.142782	0.064646	-0.0743045	0.240847	0.075744	M1 turquoise DNA Repair|0.4316
GNRH1|P01148	turquoise	0.429393	-0.0548954	-0.135491	-0.0872585	0.259163	0.242358	-0.180866	0.225159	-0.0503204	0.12784	-0.0324633	-0.00332269	-0.348796	0.0964949	-0.279025	-0.0105304	-0.0756229	0.0349227	-0.244468	0.297674	-0.181821	-0.0582746	-0.0781219	0.254838	-0.0364879	0.067398	0.00801018	-0.141464	0.193453	0.0077315	-0.103245	M1 turquoise DNA Repair|0.4294
PYDC1|Q8WXC3	turquoise	0.428175	0.301804	0.0072195	-0.279406	0.212948	0.17493	-0.17309	0.235468	0.0758672	0.228135	-0.062606	-0.0342435	-0.310551	-0.258446	-0.30264	0.192086	-0.200735	0.259704	0.043815	0.479073	-0.174806	0.489216	-0.141963	0.15178	-0.252801	-0.154076	-0.0776599	0.133399	-0.219128	0.162556	0.0626055	M1 turquoise DNA Repair|0.4282
PDIA5|Q14554	turquoise	0.428141	-0.0561236	-0.081216	-0.0348383	0.275648	0.266586	0.13954	0.0683842	-0.199095	-0.0849027	0.0815589	-0.220015	-0.60393	0.194324	-0.460492	-0.245133	-0.204189	-0.209701	-0.418472	0.380752	-0.457161	-0.165289	-0.241917	0.400732	0.198061	0.0607642	0.185687	0.0217159	0.22051	-0.121863	0.0656664	M1 turquoise DNA Repair|0.4281
GALNT3|Q14435	turquoise	0.42801	-0.0451276	0.0173508	-0.217144	0.42701	0.349968	0.16349	0.143945	-0.317358	-0.101401	0.185996	-0.325104	-0.489174	0.270184	-0.269871	-0.0950798	-0.141069	-0.137438	-0.334024	0.251224	-0.492461	-0.0981814	0.0291502	0.388166	0.0942864	0.128424	0.0994523	-0.0548004	0.161076	-0.12923	-0.00649513	M1 turquoise DNA Repair|0.428
PLXDC2|Q6UX71	turquoise	0.426181	-0.106816	-0.198997	-0.0889889	0.415238	0.325597	-0.0815647	0.246149	-0.189569	0.0298221	-0.0158799	-0.175794	-0.483651	0.00538159	-0.368179	-0.339335	0.0118769	0.0184116	-0.287352	0.276588	-0.351954	-0.0887941	-0.019094	0.242909	0.129314	-0.00213919	0.200864	-0.0947476	0.199976	-0.231735	0.0523352	M1 turquoise DNA Repair|0.4262
CSN1S1|P47710	turquoise	0.42236	0.217117	-0.00187557	-0.351646	0.294444	0.187852	-0.222048	0.35973	-0.141877	0.244991	0.0234574	-0.0136393	-0.197727	-0.240639	-0.169714	0.0778198	-0.0548074	0.310184	0.0851702	0.26948	-0.112087	0.373161	-0.0503029	0.211733	-0.215474	-0.226774	-0.0401724	0.109299	-0.081539	0.0801727	0.156669	M1 turquoise DNA Repair|0.4224
TSLP|Q969D9	turquoise	0.42191	-0.028969	-0.219841	-0.0925747	0.0069869	0.295346	-0.121926	0.375405	-0.115058	0.217358	-0.0548792	0.0147129	-0.319829	-0.188127	-0.208872	-0.104342	-0.192278	0.243199	-0.0951967	0.0926438	-0.168802	0.20278	-0.285865	0.301593	-0.101366	-0.101973	0.183442	-0.201226	0.170703	0.043079	-0.0854037	M1 turquoise DNA Repair|0.4219
DDC|P20711	turquoise	0.420783	0.119277	0.0107796	-0.191007	0.0168481	0.436141	-0.0514248	0.425669	-0.371961	0.227305	0.226473	-0.014516	-0.213825	-0.143772	0.0790093	-0.117284	-0.34364	0.173237	-0.144429	-0.140395	-0.18788	0.214426	-0.396983	0.362183	-0.055183	-0.153432	0.0640657	-5.94e-06	0.0577509	0.0402354	0.154802	M1 turquoise DNA Repair|0.4208
PDRG1|Q9NUG6	turquoise	0.412651	0.00276383	-0.288081	-0.321218	0.314644	0.260873	-0.347703	0.20624	0.0339739	0.436269	0.0315236	0.212245	-0.350605	-0.222006	-0.225588	0.0189267	-0.211313	0.267076	-0.221132	0.437114	-0.0601264	0.23381	-0.0571391	0.322329	-0.109629	-0.112838	0.00122232	-0.133978	-0.0403625	0.210993	0.0627145	M1 turquoise DNA Repair|0.4127
CTSF|Q9UBX1	turquoise	0.412269	0.0108519	0.0324975	-0.133475	0.139889	0.455759	0.0452407	0.105556	-0.346913	0.0852878	0.25693	0.000304719	-0.369627	0.186555	-0.131308	-0.022679	-0.365447	-0.121114	-0.306248	0.165668	-0.250385	-0.0816428	-0.29749	0.318353	0.00114764	0.0291785	-0.0193557	-0.0108092	0.160956	0.159048	0.0336328	M1 turquoise DNA Repair|0.4123
HNF1A|P20823	turquoise	0.41191	0.143303	0.0576828	-0.0640388	0.0719275	0.454855	-0.031221	0.283117	-0.338955	0.311175	0.322618	0.0841246	-0.317847	-0.0572124	0.0399079	-0.165131	-0.484288	0.0266696	-0.310494	0.0772037	-0.196134	0.190754	-0.415199	0.408416	-0.0498013	-0.219364	-0.0753554	-0.0318599	0.0560246	0.0809841	0.0505111	M1 turquoise DNA Repair|0.4119
TNFSF15|O95150	turquoise	0.411076	0.152949	-0.0164779	-0.174045	0.225388	0.301048	-0.0213517	0.185743	-0.0925361	0.140842	0.0903466	-0.154186	-0.408827	-0.121074	-0.235188	-0.124405	-0.338536	0.185837	-0.143045	0.366006	-0.343009	0.303151	-0.143776	0.280939	-0.179539	-0.164913	-0.0329196	0.0354751	-0.0483339	0.191707	0.05255	M1 turquoise DNA Repair|0.4111
MAPK8|P45983	turquoise	0.402535	0.127709	-0.0874835	-0.203726	0.11956	0.40898	-0.0749089	0.345805	-0.275773	0.0802807	0.134037	-0.100366	-0.306696	-0.2027	-0.0122729	-0.113793	-0.227829	0.159088	-0.142422	-0.0278664	-0.243916	0.195498	-0.216166	0.293179	-0.00214198	-0.0455867	0.154463	-0.0498041	0.0216923	0.1376	0.0638974	M1 turquoise DNA Repair|0.4025
NMU|P48645	turquoise	0.401605	0.14475	-0.107715	-0.263863	0.253592	0.376816	-0.317062	0.381201	-0.261883	0.237591	0.134385	0.0829534	-0.100615	-0.308505	0.105283	0.211327	-0.0625088	0.410992	0.0214974	0.0108788	-0.0547507	0.327299	0.070703	0.047987	-0.26221	-0.27346	-0.0300496	0.103254	-0.0435753	0.0221935	0.214635	M1 turquoise DNA Repair|0.4016
CSF3R|Q99062	turquoise	0.399489	-0.0317598	-0.170324	-0.19296	0.0465189	0.0805167	-0.144099	0.234485	0.165864	0.206606	-0.185005	0.0189558	-0.375384	-0.154972	-0.436788	-0.0697148	-0.233693	0.107578	-0.0877757	0.443741	-0.141843	0.236202	-0.261154	0.347412	-0.117838	-0.115183	0.0982336	0.0272411	-0.0189941	0.0993558	0.126472	M1 turquoise DNA Repair|0.3995
SPINK5|Q9NQ38	turquoise	0.399403	-0.0574511	-0.108454	0.0954205	0.32201	0.396256	-0.119358	0.328824	-0.266093	0.314237	0.294377	0.0913824	-0.323746	-0.0769884	-0.0127529	-0.236989	-0.252132	0.0784465	-0.365326	0.225594	-0.159629	0.0464014	-0.126156	0.287742	-0.115667	-0.227784	-0.0847576	-0.141762	0.218146	0.0964877	0.121755	M1 turquoise DNA Repair|0.3994
DAPK1|P53355	turquoise	0.374814	-0.00113486	-0.188624	-0.0143022	-0.120544	0.0939441	-0.0463607	0.34885	0.0320212	0.111878	-0.269493	-0.0440586	-0.371906	-0.206112	-0.407404	0.00858363	-0.132874	0.0978146	-0.0532786	0.134998	-0.158587	0.227817	-0.422186	0.390733	0.0790752	-0.0746653	0.296147	0.0037135	0.0767233	-0.14672	0.0934643	M1 turquoise DNA Repair|0.3748
BRDT|Q58F21	turquoise	0.372325	0.0152118	-0.19584	-0.186546	0.31515	0.290163	-0.184811	0.145819	-0.0490887	0.247984	0.0685338	-0.000201133	-0.380892	-0.237404	-0.274716	-0.127159	-0.143357	0.267005	-0.181934	0.386446	-0.238684	0.206957	-0.0231951	0.203068	-0.227754	-0.195322	-0.077763	-0.0339867	-0.0181458	0.0718604	0.0765168	M1 turquoise DNA Repair|0.3723
MUC1|P15941	turquoise	0.367381	0.165923	0.0518458	-0.136578	0.195384	0.124131	-0.149421	0.252534	0.095107	0.113891	-0.187514	-0.10823	-0.268326	-0.0127844	-0.285801	-0.0862022	0.0646799	0.286734	0.0624935	0.315533	-0.137351	0.225653	-0.0482751	-0.00681777	-0.230943	-0.145043	-0.109383	0.0683945	0.00760454	-0.0487806	0.0166531	M1 turquoise DNA Repair|0.3674
PLEKHA1|Q9HB21	turquoise	0.358747	0.159365	0.0559288	-0.31416	0.125192	0.335341	0.0977341	0.0223879	-0.166829	0.0600127	0.176844	-0.19982	-0.370767	-0.026668	-0.127257	0.0105611	-0.491673	0.0554386	-0.171808	0.24146	-0.382481	0.204445	-0.191212	0.311754	-0.00745821	0.0113588	0.0654966	0.0523964	-0.152459	0.121963	-0.0385519	M1 turquoise DNA Repair|0.3587
GSKIP|Q9P0R6	turquoise	0.348804	0.184496	0.0691255	-0.174908	-0.0538638	0.156377	0.0469637	0.0548004	-0.0115847	0.0563768	-0.0687778	-0.154948	-0.301744	-0.088546	-0.296204	0.144321	-0.297616	0.0830833	0.00638939	0.263631	-0.25781	0.325516	-0.331369	0.22288	-0.0754275	-0.0385141	0.062275	0.086431	-0.156182	0.115749	-0.0631566	M1 turquoise DNA Repair|0.3488
CARTPT|Q16568	turquoise	0.346955	0.0805817	-0.0908813	-0.323214	0.141601	0.216256	-0.196002	0.18972	-0.093484	0.146253	0.0210468	0.0526535	-0.255955	-0.0357391	-0.18236	0.272843	-0.0115869	0.103192	-0.129621	0.193735	-0.108092	0.147906	-0.105418	0.214624	-0.0702249	0.0721084	-0.00932885	0.0890593	-0.00587447	0.0215059	0.107444	M1 turquoise DNA Repair|0.347
GRB10|Q13322	turquoise	0.336051	0.0657734	-0.0903361	-0.161157	0.0573354	-0.0476944	-0.105376	0.312014	0.109272	0.112772	-0.330728	-0.0841907	-0.311135	-0.17277	-0.524502	-0.0665788	0.120242	0.19631	0.0938531	0.283478	-0.101254	0.245023	-0.197066	0.199135	-0.0274769	-0.0438458	0.197975	-0.00862607	0.0596933	0.047162	0.0456023	M1 turquoise DNA Repair|0.3361
KRT5|P13647	turquoise	0.33359	-0.268567	-0.380325	0.130935	0.319031	0.205021	-0.330007	0.282914	0.00253412	0.246924	-0.0197729	0.191211	-0.281455	-0.0816862	-0.207097	-0.0911146	0.0521458	0.10364	-0.318294	0.309035	-0.0131237	-0.112556	0.0400937	0.205453	-0.113463	-0.128483	-0.000841821	-0.242274	0.296873	0.0033312	0.00613078	M1 turquoise DNA Repair|0.3336
DCUN1D3|Q8IWE4	turquoise	0.32815	0.124787	-0.056983	-0.0898618	-0.0661503	0.239527	-0.0924803	0.280324	-0.059689	0.181504	-0.014771	-0.0223316	-0.154817	-0.221248	-0.0537714	0.183113	-0.321004	0.29526	0.016762	0.0787111	-0.131792	0.351058	-0.327349	0.154709	-0.253244	-0.194226	-0.00540069	-0.0151679	-0.0378502	0.101412	-0.0134886	M1 turquoise DNA Repair|0.3282
CST5|P28325	turquoise	0.327604	-0.225821	-0.165107	0.285126	0.186514	0.268748	-0.0493106	0.286127	-0.207284	0.245276	0.175556	0.140004	-0.325163	0.0121313	-0.103069	-0.291812	-0.208487	-0.0822382	-0.429993	0.176775	-0.107244	-0.172553	-0.238239	0.301451	0.014848	-0.0774606	0.0333111	-0.278543	0.335387	-0.12503	-0.0323434	M1 turquoise DNA Repair|0.3276
LYSMD3|Q7Z3D4	turquoise	0.326642	0.100124	0.0572839	-0.0992933	0.184779	0.13556	0.0662745	0.0564605	-0.0291532	-0.0370759	-0.048491	-0.239313	-0.312217	0.144072	-0.323109	0.0594991	-0.0820682	0.0290498	-0.0458071	0.317372	-0.286909	0.101337	-0.0208427	0.132378	-0.100503	0.040852	0.0174856	-0.0508586	0.115536	0.120432	-0.184589	M1 turquoise DNA Repair|0.3266
NUP98|P52948	turquoise	0.313694	0.0182539	-0.182413	-0.0448869	0.135439	0.204704	-0.15191	0.277881	-0.0714837	0.174055	-0.0387492	-0.0124228	-0.222652	-0.332777	-0.145395	0.0886312	-0.148387	0.280514	-0.0327113	0.151615	-0.143101	0.267459	-0.121811	0.176204	-0.116458	-0.19142	0.0950579	-0.0469779	0.026551	-0.0961627	0.0879503	M1 turquoise DNA Repair|0.3137
GALNT7|Q86SF2	turquoise	0.308301	0.226519	0.193184	-0.287452	0.102928	0.296593	0.144677	-0.0327457	-0.268887	-0.112697	0.169749	-0.233467	-0.278093	0.161484	-0.136093	0.16098	-0.265102	-0.0688269	-0.0877885	0.161046	-0.364531	0.100219	-0.198933	0.223393	0.00835923	0.116398	0.0360147	0.154935	-0.126834	0.099073	-0.0331774	M1 turquoise DNA Repair|0.3083
GABBR1|Q9UBS5	blue	0.213751	0.917238	0.576628	-0.688292	0.212036	0.285476	0.0875215	-0.106766	-0.169304	-0.110378	0.297163	-0.398473	-0.0943833	-0.107584	0.118634	0.30145	-0.288253	0.184706	0.266194	0.206935	-0.381994	0.736374	0.0515121	-0.0398554	-0.321498	-0.182352	-0.328394	0.550987	-0.718366	0.401946	0.0643706	M2 blue Presynapse|0.9172
LRP12|Q9Y561	blue	0.118813	0.895717	0.542972	-0.623143	0.167592	0.106449	0.0879352	-0.156689	-0.0541102	-0.166674	0.124411	-0.407919	0.00103957	-0.155411	0.0549999	0.398775	-0.143478	0.218664	0.425058	0.197117	-0.30048	0.72898	0.11821	-0.131936	-0.270397	-0.0973464	-0.261519	0.585501	-0.720261	0.345339	0.0548573	M2 blue Presynapse|0.8957
GLRX2|Q9NS18	blue	0.0615073	0.884036	0.745779	-0.613079	0.0782087	0.205907	0.32807	-0.29549	-0.204362	-0.335911	0.303029	-0.526551	-0.0212542	0.15927	0.137718	0.292065	-0.245318	-0.0721291	0.291776	0.0688894	-0.42803	0.493752	-0.0163681	-0.0351142	-0.0881223	0.0427484	-0.268555	0.610459	-0.704589	0.365305	-0.00946304	M2 blue Presynapse|0.884
NPTN|Q9Y639	blue	0.0512131	0.879167	0.562925	-0.581744	0.0959967	0.102279	0.0870588	-0.199749	-0.0779201	-0.249594	0.1424	-0.35588	0.0634172	-0.146845	0.129589	0.379829	-0.0526871	0.148729	0.438067	0.0851704	-0.212222	0.633755	0.111728	-0.202309	-0.257596	-0.123126	-0.262304	0.73433	-0.736297	0.266512	0.184891	M2 blue Presynapse|0.8792
SYT5|O00445	blue	0.105706	0.878913	0.673461	-0.57505	0.156455	0.240251	0.269325	-0.252339	-0.234618	-0.295856	0.33261	-0.503826	-0.0694364	0.131257	0.104391	0.240836	-0.236618	-0.0589831	0.250083	0.156654	-0.45457	0.476206	-0.0210876	-0.046696	-0.156437	-0.0372669	-0.301573	0.491076	-0.631983	0.326524	-0.143218	M2 blue Presynapse|0.8789
STAMBPL1|Q96FJ0	blue	0.112985	0.87674	0.678521	-0.574713	0.150862	0.20607	0.278239	-0.263833	-0.153379	-0.281936	0.270708	-0.512631	-0.0822779	0.077695	0.0702553	0.286557	-0.268925	0.00702983	0.291115	0.20419	-0.435604	0.540796	0.00605464	-0.0631562	-0.19457	-0.059974	-0.299588	0.576199	-0.69428	0.370806	-0.0448435	M2 blue Presynapse|0.8767
EPHA5|P54756	blue	-0.0291988	0.870611	0.631585	-0.487605	0.0869384	0.0828903	0.153814	-0.275328	-0.0945373	-0.332846	0.162937	-0.422037	0.109983	-0.0193884	0.154135	0.308891	-0.00653865	0.067196	0.466746	0.0439797	-0.249785	0.525183	0.13211	-0.308908	-0.239618	-0.0894679	-0.326559	0.63341	-0.706198	0.22583	0.0059381	M2 blue Presynapse|0.8706
SMIM24|O75264	blue	-0.260546	0.86759	0.827417	-0.478382	-0.099749	-0.107938	0.352579	-0.583005	0.0609462	-0.397899	0.16986	-0.449162	0.250571	0.204424	0.198968	0.410853	-0.173155	-0.108276	0.498014	0.0527739	-0.212865	0.456384	0.0825561	-0.354745	-0.198664	0.0105465	-0.467389	0.70209	-0.839194	0.398581	-0.0428851	M2 blue Presynapse|0.8676
UNC5A|Q6ZN44	blue	0.0984062	0.865588	0.637003	-0.52586	0.172385	0.335101	0.192742	-0.264869	-0.289125	-0.229824	0.423542	-0.397846	-0.0282581	0.0973664	0.276305	0.236685	-0.304603	-0.00581698	0.171214	0.0433592	-0.389071	0.463203	0.0339674	-0.0861213	-0.204498	-0.0315461	-0.371468	0.415301	-0.647145	0.365242	-0.190614	M2 blue Presynapse|0.8656
RAF1|P04049	blue	0.0449366	0.865387	0.842984	-0.528958	0.0601278	0.215404	0.457446	-0.303752	-0.298926	-0.368686	0.40163	-0.57258	-0.0187998	0.283976	0.170035	0.249377	-0.339002	-0.201576	0.240634	0.0546881	-0.479938	0.407525	-0.0928302	-0.020472	-0.0692946	0.0273106	-0.30047	0.562341	-0.600961	0.402131	-0.0502036	M2 blue Presynapse|0.8654
NETO1|Q8TDF5	blue	0.150949	0.863981	0.424707	-0.551273	0.19723	0.140962	-0.0392462	-0.0633863	-0.0194033	-0.0746493	0.0928738	-0.307846	-0.0262896	-0.248727	0.0585857	0.279129	-0.0665482	0.274951	0.365696	0.212485	-0.240386	0.746113	0.132439	-0.148184	-0.317994	-0.174858	-0.2489	0.529277	-0.67411	0.30056	0.0292986	M2 blue Presynapse|0.864
LRTM2|Q8N967	blue	-0.116762	0.858443	0.676649	-0.467328	0.0061863	0.0103048	0.209994	-0.393067	-0.0218903	-0.360423	0.163883	-0.414528	0.172026	0.0389994	0.178471	0.359791	-0.076133	0.0129378	0.473616	0.0466845	-0.217055	0.477308	0.102834	-0.328742	-0.246988	-0.0547827	-0.384806	0.690745	-0.747901	0.278583	0.0052083	M2 blue Presynapse|0.8584
STX3|Q13277	blue	0.0463125	0.854569	0.670441	-0.598795	0.0917282	0.23835	0.21771	-0.288826	-0.202331	-0.152424	0.412249	-0.323819	0.0276424	0.082956	0.284846	0.377699	-0.398289	-0.0188035	0.20986	0.0805659	-0.298996	0.564239	0.0274856	-0.0185434	-0.192881	-0.0363113	-0.380862	0.454667	-0.705836	0.4956	-0.0768111	M2 blue Presynapse|0.8546
MAGI2|Q86UL8	blue	-0.0447272	0.85016	0.738594	-0.583776	-0.0415637	-0.000276316	0.356962	-0.401261	-0.00347827	-0.301155	0.178137	-0.455574	0.0449472	0.150009	0.0635868	0.377692	-0.292139	-0.0652109	0.403381	0.181196	-0.32438	0.564569	-0.0265154	-0.0632986	-0.103687	0.0819122	-0.258793	0.480439	-0.740774	0.448069	-0.182771	M2 blue Presynapse|0.8502
KIRREL3|Q8IZU9	blue	0.0787384	0.849576	0.575062	-0.562019	0.060701	0.073334	0.176748	-0.238802	0.00680683	-0.20733	0.102255	-0.43544	-0.0371074	-0.0802176	0.0223325	0.281024	-0.174112	0.14835	0.37949	0.191382	-0.319714	0.719295	0.0471035	-0.133992	-0.260512	-0.135476	-0.271367	0.723268	-0.772456	0.32285	0.189697	M2 blue Presynapse|0.8496
ITSN1|Q15811	blue	0.077151	0.847804	0.751123	-0.545724	0.101595	0.179725	0.375196	-0.300229	-0.194962	-0.283363	0.305638	-0.515513	-0.0393611	0.18572	0.134895	0.311531	-0.340267	-0.0630547	0.258971	0.125879	-0.422216	0.54392	0.0214977	-0.0510969	-0.140481	0.0182032	-0.283979	0.52248	-0.676894	0.48683	-0.0727612	M2 blue Presynapse|0.8478
SMURF1|Q9HCE7	blue	0.25585	0.842361	0.574419	-0.688454	0.282898	0.355265	0.237198	-0.126705	-0.289076	-0.237414	0.349056	-0.53134	-0.227431	0.0139547	0.0447261	0.252271	-0.329313	0.0525257	0.148542	0.185564	-0.536451	0.571097	0.0367154	0.0837752	-0.146821	-0.0505249	-0.178928	0.422957	-0.591352	0.426054	-0.0296276	M2 blue Presynapse|0.8424
TENM4|Q6N022	blue	0.122304	0.83713	0.668185	-0.621447	0.167407	0.299094	0.299594	-0.164009	-0.34024	-0.216642	0.37323	-0.486638	-0.0709244	0.174254	0.159182	0.185995	-0.285219	-0.0636904	0.187595	0.0360188	-0.448098	0.448387	-0.00328475	0.0585651	-0.0421053	0.0361715	-0.223187	0.453111	-0.491334	0.333609	-0.0777056	M2 blue Presynapse|0.8371
TMED2|Q15363	blue	0.0219078	0.835447	0.672555	-0.504188	0.0250044	-0.0351595	0.331102	-0.335713	0.0847921	-0.33222	0.0348159	-0.549268	-0.0273181	0.0892859	-0.0782285	0.335375	-0.150213	0.0415526	0.474997	0.250557	-0.35845	0.64987	0.0444268	-0.15577	-0.207058	-0.0688384	-0.271737	0.539619	-0.68349	0.367355	-0.110257	M2 blue Presynapse|0.8354
EPHB6|O15197	blue	-0.159748	0.83365	0.780151	-0.394264	-0.0568709	-0.0270292	0.415169	-0.440734	-0.0582868	-0.480046	0.163217	-0.563877	0.150338	0.203448	0.143886	0.280196	-0.119825	-0.149743	0.473867	0.00856972	-0.337482	0.37285	0.0394358	-0.261432	-0.0548265	0.0465269	-0.273803	0.555151	-0.68533	0.301018	-0.215411	M2 blue Presynapse|0.8336
ROBO3|Q96MS0	blue	-0.135605	0.833186	0.738129	-0.428826	-0.0708946	-0.0539714	0.282051	-0.307839	-0.0174789	-0.304304	0.127471	-0.390744	0.222959	0.0762022	0.26161	0.352195	-0.106031	-0.0158125	0.489303	-0.0436674	-0.146607	0.479871	0.0652979	-0.266738	-0.134636	-0.0507523	-0.309712	0.691261	-0.726349	0.283013	0.0802356	M2 blue Presynapse|0.8332
VWC2L|B2RUY7	blue	0.143172	0.826615	0.486811	-0.575751	0.151333	0.128697	-0.0145193	-0.118291	0.0123775	-0.0590352	0.107251	-0.287521	0.0279843	-0.155098	0.0963534	0.465219	-0.128673	0.302239	0.419319	0.239657	-0.210095	0.743693	0.126222	-0.200497	-0.398569	-0.23078	-0.380021	0.511921	-0.674352	0.383987	0.02379	M2 blue Presynapse|0.8266
RSPO3|Q9BXY4	blue	0.0832617	0.826192	0.631293	-0.545608	0.171693	0.115183	0.243447	-0.273552	-0.0505165	-0.251615	0.201247	-0.452923	-0.0649078	0.176649	0.0121968	0.238379	-0.187172	-0.0244612	0.275205	0.277786	-0.376799	0.481025	0.0565521	-0.125116	-0.214029	-0.0361175	-0.358128	0.501117	-0.588893	0.296999	-0.106693	M2 blue Presynapse|0.8262
STX12|Q86Y82	blue	-0.191571	0.826002	0.811218	-0.451531	-0.124315	-0.105296	0.400649	-0.509198	0.0545434	-0.479164	0.0690247	-0.500186	0.18457	0.294759	0.0649893	0.386884	-0.048021	-0.153055	0.535375	0.0495815	-0.238181	0.395617	0.0645592	-0.308489	-0.120762	0.101903	-0.346682	0.553894	-0.686468	0.317606	-0.217443	M2 blue Presynapse|0.826
TMEM132D|Q14C87	blue	-0.0707488	0.824744	0.71985	-0.439258	0.00335588	0.0596725	0.388606	-0.379966	-0.125542	-0.359581	0.227801	-0.530805	0.0361243	0.14884	0.0868127	0.18917	-0.226271	-0.129346	0.354392	0.0787274	-0.386973	0.425372	-0.0136366	-0.125712	-0.0651731	-0.000529742	-0.241614	0.585829	-0.638597	0.322103	-0.103572	M2 blue Presynapse|0.8247
TNFRSF14|Q92956	blue	0.0684051	0.816325	0.490632	-0.451982	0.1642	0.0767021	-0.00337678	-0.0858133	0.0279289	-0.0931894	0.097007	-0.322274	0.0559576	-0.194344	0.131832	0.272396	-0.0756392	0.255809	0.417478	0.173317	-0.18771	0.704943	0.180948	-0.226045	-0.36511	-0.276711	-0.353238	0.57631	-0.683903	0.312974	0.0901503	M2 blue Presynapse|0.8163
TMEM132B|Q14DG7	blue	-0.189724	0.814774	0.696597	-0.396364	-0.0713689	-0.0740611	0.323272	-0.402747	0.00703271	-0.413948	0.0815967	-0.501894	0.18393	0.0740029	0.127723	0.264531	-0.054728	-0.0553721	0.508261	-0.00963599	-0.253199	0.443581	0.09578	-0.301832	-0.105204	-0.0217924	-0.254458	0.683151	-0.696547	0.28057	-0.016905	M2 blue Presynapse|0.8148
STX2|P32856	blue	-0.0115702	0.81084	0.66658	-0.528916	0.00975589	0.0871849	0.279403	-0.344928	-0.0591152	-0.211464	0.228294	-0.376302	0.0317207	0.172605	0.127012	0.312247	-0.311463	-0.0855591	0.294982	0.143093	-0.292168	0.531876	-0.00390533	-0.0393164	-0.124018	0.0645958	-0.307688	0.34945	-0.657823	0.453739	-0.279133	M2 blue Presynapse|0.8108
VTI1B|Q9UEU0	blue	0.20956	0.805328	0.613652	-0.567744	0.236291	0.44585	0.219779	-0.142659	-0.401546	-0.101085	0.534413	-0.374459	-0.121163	0.0564155	0.280848	0.196483	-0.432674	0.0237039	0.0352201	0.0798558	-0.445204	0.50467	0.00430424	0.0614883	-0.154838	-0.0677481	-0.285976	0.383358	-0.582105	0.432967	-0.0473194	M2 blue Presynapse|0.8053
CBLN4|Q9NTU7	blue	-0.186122	0.80351	0.595673	-0.441393	-0.0279716	-0.125346	0.118216	-0.313595	0.0968581	-0.304282	0.0195483	-0.325749	0.291797	-0.0619431	0.215814	0.404082	0.0717918	0.0929084	0.585807	-0.0160906	-0.0547421	0.494434	0.202548	-0.404727	-0.229785	-0.0791819	-0.307488	0.689464	-0.748731	0.238797	0.0662607	M2 blue Presynapse|0.8035
MANSC1|Q9H8J5	blue	-0.167122	0.79852	0.66342	-0.41921	-0.0165917	0.0477883	0.224947	-0.39874	-0.0998703	-0.407638	0.207695	-0.372503	0.244446	0.122823	0.324121	0.401331	-0.0531813	-0.0261723	0.438057	-0.120824	-0.172624	0.39215	0.198251	-0.324228	-0.178419	0.0511478	-0.358909	0.408981	-0.626858	0.330848	-0.258667	M2 blue Presynapse|0.7985
ICAM5|Q9UMF0	blue	-0.0254111	0.798206	0.654988	-0.505285	0.124527	0.139875	0.259538	-0.316917	-0.174869	-0.341723	0.259504	-0.455106	0.0808765	0.109134	0.185873	0.264163	-0.10372	-0.0395507	0.321026	0.0190376	-0.325648	0.36483	0.0882914	-0.226827	-0.134772	0.0536411	-0.288434	0.695718	-0.668482	0.242919	0.089867	M2 blue Presynapse|0.7982
ISLR2|Q6UXK2	blue	-0.0597362	0.797025	0.766744	-0.401345	0.0294097	0.0640329	0.507717	-0.422135	-0.15224	-0.53213	0.222511	-0.683003	-0.00630674	0.20235	0.0366375	0.218042	-0.194279	-0.17717	0.359199	0.084057	-0.504666	0.329593	-0.0167865	-0.158325	-0.00480383	0.0284289	-0.186866	0.620053	-0.622068	0.265772	-0.101469	M2 blue Presynapse|0.797
UNC5D|Q6UXZ4	blue	0.167693	0.795845	0.523811	-0.522675	0.0821631	0.0635635	0.118019	-0.243569	0.0868869	-0.0741875	0.113343	-0.298646	-0.152248	0.0144053	-0.127603	0.294402	-0.331316	0.0192687	0.236566	0.444959	-0.303113	0.63107	-0.0968488	0.0617769	-0.236575	-0.0392475	-0.315566	0.403361	-0.670459	0.453308	-0.182272	M2 blue Presynapse|0.7958
VTI1A|Q96AJ9	blue	0.00778289	0.795585	0.693855	-0.43752	0.157348	0.367252	0.25003	-0.201812	-0.45168	-0.206893	0.584571	-0.384083	0.122974	0.0636451	0.495288	0.211147	-0.317546	-0.00863368	0.16678	-0.161116	-0.342784	0.395186	0.0694726	-0.135889	-0.159855	-0.122326	-0.344703	0.461679	-0.596224	0.36717	0.00709112	M2 blue Presynapse|0.7956
LRRTM2|O43300	blue	0.00790954	0.793761	0.542168	-0.434403	0.154512	0.243256	0.135639	-0.159286	-0.262814	-0.234281	0.338707	-0.387076	0.146015	-0.114524	0.383302	0.303713	-0.156397	0.183065	0.324739	-0.0922738	-0.269151	0.486449	0.142706	-0.25461	-0.24915	-0.130832	-0.283823	0.502775	-0.602619	0.278016	-0.00130693	M2 blue Presynapse|0.7938
ADAM23|O75077	blue	0.140525	0.793577	0.471485	-0.536845	0.175916	0.262169	0.0358945	-0.0740657	-0.220873	-0.0362767	0.369062	-0.244082	-0.0178152	-0.206729	0.236584	0.215495	-0.248724	0.13511	0.19151	0.105547	-0.24251	0.630258	0.00938918	-0.0265916	-0.279701	-0.229048	-0.282126	0.552527	-0.679434	0.316488	0.190736	M2 blue Presynapse|0.7936
UBQLN4|Q9NRR5	blue	-0.0282032	0.793597	0.598608	-0.529587	0.0130518	-0.0351312	0.189382	-0.323963	0.0687428	-0.306354	0.0366793	-0.386211	0.105035	0.00845085	-0.0141933	0.425754	-0.0728817	0.0765845	0.52196	0.192286	-0.205833	0.571303	0.0954555	-0.207333	-0.239985	0.0212201	-0.249288	0.413566	-0.669623	0.393607	-0.220905	M2 blue Presynapse|0.7936
NPTX2|P47972	blue	-0.18509	0.793189	0.611615	-0.384944	-0.0606845	-0.119643	0.135743	-0.337424	0.101362	-0.276666	0.0199335	-0.313904	0.258372	-0.000705816	0.149639	0.316589	0.0495628	0.0253256	0.551875	0.0230859	-0.0822109	0.493422	0.144288	-0.380594	-0.222892	-0.0818954	-0.33987	0.649696	-0.710818	0.214342	-0.0139116	M2 blue Presynapse|0.7932
BRICD5|Q6PL45	blue	0.133288	0.79047	0.586119	-0.502872	0.289429	0.405272	0.177397	-0.0649122	-0.423997	-0.114866	0.507779	-0.423786	0.0318762	-0.0637373	0.399802	0.139446	-0.294204	0.148996	0.183828	-0.033031	-0.395455	0.527925	0.133815	-0.0992988	-0.201711	-0.198652	-0.281301	0.470769	-0.559482	0.302732	0.0686261	M2 blue Presynapse|0.7905
STMN3|Q9NZ72	blue	0.0773278	0.787697	0.549708	-0.516461	0.0512138	0.108362	0.172949	-0.246318	-0.0225186	-0.0961078	0.143563	-0.364037	-0.0456327	-0.00601088	0.0327057	0.312674	-0.30501	0.0948545	0.281914	0.209465	-0.312057	0.658475	0.0107082	-0.0255295	-0.183802	-0.0279884	-0.266036	0.432682	-0.662738	0.467536	-0.100333	M2 blue Presynapse|0.7877
FAM19A1|Q7Z5A9	blue	0.0373824	0.787019	0.530646	-0.446142	0.0444719	-0.0346874	0.12054	-0.306087	0.161534	-0.148536	0.0162222	-0.338238	-0.0579353	0.0695208	-0.110025	0.247912	-0.155863	0.00117932	0.314448	0.344364	-0.268683	0.579357	0.00280788	-0.101574	-0.206149	-0.0116663	-0.33512	0.469434	-0.67587	0.293112	-0.162726	M2 blue Presynapse|0.787
PRKCSH|P14314	blue	-0.0438737	0.7788	0.746698	-0.527949	-0.00620624	0.0422946	0.351698	-0.389398	-0.08172	-0.356573	0.194977	-0.448737	0.0546446	0.233651	0.0793704	0.326577	-0.23042	-0.14819	0.36474	0.0872561	-0.301505	0.438252	0.00543457	-0.126242	-0.148563	0.0223394	-0.375277	0.597173	-0.624585	0.402518	0.00635929	M2 blue Presynapse|0.7788
GFRA2|O00451	blue	-0.346173	0.777334	0.764579	-0.35914	-0.169447	-0.188615	0.330596	-0.524766	0.0726679	-0.448099	0.0899218	-0.396589	0.363589	0.226645	0.227755	0.391815	-0.00238413	-0.165293	0.572513	-0.0676431	-0.110826	0.325867	0.0999555	-0.393968	-0.12301	0.0614988	-0.383534	0.534061	-0.684888	0.269661	-0.231724	M2 blue Presynapse|0.7773
JTB|O76095	blue	-0.0316376	0.776023	0.537769	-0.47647	-0.00207087	-0.00310978	0.0666028	-0.311687	0.118712	-0.105982	0.109114	-0.271907	0.102922	-0.0841752	0.0636844	0.351859	-0.229846	0.144732	0.411055	0.214862	-0.171974	0.705119	0.0341899	-0.193867	-0.332067	-0.142201	-0.40706	0.399549	-0.749409	0.440962	-0.136131	M2 blue Presynapse|0.776
NRXN1|Q9ULB1	blue	0.0286929	0.775135	0.442448	-0.464751	0.052844	-0.0352741	0.019774	-0.22527	0.120419	-0.0784988	0.0377287	-0.259653	0.0340728	-0.169448	0.00682896	0.298736	-0.135845	0.149014	0.383446	0.27176	-0.168045	0.668357	0.0533535	-0.120041	-0.257137	-0.128294	-0.285218	0.517598	-0.737379	0.277755	-0.0269645	M2 blue Presynapse|0.7751
DOC2B|Q14184	blue	0.326177	0.76551	0.472393	-0.553084	0.236233	0.342472	0.123425	0.0790456	-0.255549	0.00393028	0.286502	-0.356046	-0.212213	-0.0884439	0.0537962	0.0398491	-0.310358	0.134326	0.0956767	0.207942	-0.404891	0.623433	-0.0542627	0.174086	-0.149121	-0.156902	-0.119146	0.410956	-0.480041	0.394825	0.0680493	M2 blue Presynapse|0.7655
SLITRK4|Q8IW52	blue	0.131047	0.762185	0.638096	-0.381632	0.110341	0.176074	0.336173	-0.261183	-0.124369	-0.302466	0.236192	-0.567643	-0.170402	0.0235814	-0.0269862	0.171987	-0.334767	-0.0427539	0.207795	0.238764	-0.499699	0.565821	-0.0771409	-0.0355049	-0.119312	-0.144299	-0.195145	0.612918	-0.673055	0.389277	0.0648585	M2 blue Presynapse|0.7622
PRKCG|P05129	blue	0.0698168	0.760018	0.488699	-0.524023	0.180453	0.206927	0.131115	-0.188075	-0.192545	-0.197756	0.320712	-0.357318	-0.00568098	-0.00462741	0.160376	0.298065	-0.198708	0.0425659	0.216782	0.127774	-0.325038	0.422093	0.0471701	-0.0790252	-0.199714	-0.055111	-0.28419	0.334825	-0.513705	0.338571	-0.141336	M2 blue Presynapse|0.76
SLITRK1|Q96PX8	blue	-0.293832	0.758783	0.743022	-0.281925	-0.123364	-0.146706	0.375713	-0.451457	0.0552227	-0.503194	0.063389	-0.536759	0.294304	0.0987508	0.217717	0.304143	-0.0114427	-0.0577455	0.590173	-0.0753405	-0.215364	0.372678	0.129737	-0.432146	-0.10887	-0.0776493	-0.286672	0.686169	-0.708236	0.220998	-0.0236712	M2 blue Presynapse|0.7588
QPCT|Q16769	blue	0.0129412	0.757479	0.589552	-0.366382	0.0529533	0.104616	0.207882	-0.278719	-0.079165	-0.242508	0.193028	-0.403484	0.0481591	-0.0507728	0.149136	0.265908	-0.258374	0.0896091	0.34155	0.110114	-0.291458	0.570873	0.0158692	-0.196082	-0.240107	-0.158765	-0.302804	0.661066	-0.683668	0.288776	0.15121	M2 blue Presynapse|0.7575
CLINT1|Q14677	blue	0.28096	0.756384	0.461468	-0.630804	0.244664	0.282972	0.151944	-0.0593567	-0.185443	-0.0632874	0.274126	-0.407349	-0.232743	-0.0696121	-0.0284484	0.259663	-0.364636	0.0959777	0.130603	0.303623	-0.447213	0.627391	-0.0498351	0.139016	-0.205445	-0.0864164	-0.199013	0.370034	-0.55154	0.431437	0.0110306	M2 blue Presynapse|0.7564
STX8|Q9UNK0	blue	-0.0624848	0.749738	0.680567	-0.424735	-0.0456239	-0.0307631	0.34441	-0.443434	0.066252	-0.290592	0.132898	-0.425176	0.0254609	0.243253	-0.00405179	0.288953	-0.252666	-0.110993	0.342057	0.241371	-0.307706	0.467243	-0.0363688	-0.124899	-0.151537	0.0587867	-0.331471	0.35871	-0.644541	0.420335	-0.310982	M2 blue Presynapse|0.7497
VWC2|Q2TAL6	blue	-0.118843	0.745256	0.708474	-0.471143	0.0358524	0.152221	0.246243	-0.359282	-0.20496	-0.356374	0.306348	-0.384446	0.199148	0.254097	0.286367	0.2609	-0.0961746	-0.0993806	0.342754	-0.125114	-0.238054	0.305594	0.132213	-0.278301	-0.166056	0.000707026	-0.40033	0.450081	-0.542549	0.309069	-0.145568	M2 blue Presynapse|0.7453
CACNA2D3|Q8IZS8	blue	-0.0775958	0.7404	0.440571	-0.411535	0.000269554	-0.168828	0.0143613	-0.210443	0.219902	-0.157409	-0.115381	-0.285105	0.178596	-0.188434	0.0336123	0.367963	0.0737351	0.203212	0.5614	0.164042	-0.0619714	0.639683	0.188177	-0.284539	-0.237412	-0.0925736	-0.226579	0.558231	-0.709621	0.239952	-0.012093	M2 blue Presynapse|0.7404
EPHA10|Q5JZY3	blue	-0.123528	0.734477	0.702356	-0.406993	0.111409	0.177868	0.29267	-0.259891	-0.313735	-0.318128	0.4134	-0.439607	0.177993	0.193324	0.380057	0.146847	-0.101609	-0.132501	0.276182	-0.123423	-0.314253	0.241592	0.113311	-0.243741	-0.0753835	-0.0669894	-0.32569	0.57421	-0.511184	0.200624	0.0361991	M2 blue Presynapse|0.7345
OLFM1|Q99784	blue	-0.022324	0.731212	0.590351	-0.541162	0.0672204	0.197564	0.233793	-0.325318	-0.213766	-0.165086	0.373359	-0.306523	0.0158376	0.161078	0.19716	0.156356	-0.281691	-0.109113	0.128838	0.0428384	-0.300706	0.371572	-0.00869549	-0.0525183	-0.125341	0.0437714	-0.328928	0.531835	-0.604319	0.339524	0.0368045	M2 blue Presynapse|0.7312
NRG3|P56975	blue	0.288453	0.731035	0.412632	-0.518163	0.216003	0.277976	0.0553424	-0.0584205	-0.139444	0.00545853	0.201611	-0.311577	-0.198778	-0.11245	-0.00621211	0.162145	-0.292884	0.169675	0.156754	0.296118	-0.375682	0.634549	-0.0434018	0.0503025	-0.180259	-0.10469	-0.184041	0.364086	-0.594166	0.299764	-0.0855394	M2 blue Presynapse|0.731
TMEM132A|Q24JP5	blue	-0.100712	0.729643	0.688528	-0.404492	-0.0218265	0.167964	0.353302	-0.381941	-0.229605	-0.324163	0.367865	-0.423244	0.0813528	0.173866	0.259341	0.200679	-0.317594	-0.140323	0.237718	-0.0588237	-0.331118	0.310416	0.00491599	-0.0777379	-0.07927	-0.022568	-0.285068	0.456108	-0.601473	0.409915	-0.12029	M2 blue Presynapse|0.7296
DNAJB11|Q9UBS4	blue	-0.0829897	0.721062	0.528698	-0.496203	0.105449	0.109645	0.072306	-0.227311	-0.118589	-0.271472	0.19165	-0.27879	0.235111	0.00163822	0.302361	0.350205	0.0344434	0.138852	0.43119	-0.117097	-0.106669	0.420539	0.298923	-0.319471	-0.219968	-0.024452	-0.310031	0.342155	-0.539706	0.287613	-0.14705	M2 blue Presynapse|0.7211
GAD1|Q99259	blue	0.0834366	0.718397	0.683464	-0.479352	0.069843	0.182082	0.335278	-0.185097	-0.204686	-0.266406	0.316102	-0.489017	-0.0422769	0.0893077	0.14225	0.205561	-0.299214	-0.0722815	0.228536	0.0924512	-0.390367	0.448841	-0.0195228	-0.0666971	-0.0885074	-0.147129	-0.198423	0.721354	-0.60516	0.375114	0.304344	M2 blue Presynapse|0.7184
CRTAC1|Q9NQ79	blue	0.0852219	0.717064	0.452503	-0.363958	0.0672186	0.0807692	0.00128741	-0.106321	-0.0389235	-0.162053	0.0550296	-0.282822	0.0165419	-0.157919	0.0139714	0.286163	-0.011577	0.125421	0.350796	0.144424	-0.180688	0.559446	0.020358	-0.176211	-0.234723	-0.111604	-0.246752	0.424249	-0.558047	0.218782	-0.0507598	M2 blue Presynapse|0.7171
CRYGD|P07320	blue	0.205259	0.715258	0.469978	-0.440604	0.16661	0.160354	0.0455039	0.073722	-0.101162	-0.0148911	0.149566	-0.29571	-0.0322445	-0.183143	0.14051	0.105176	-0.120061	0.263186	0.297903	0.127643	-0.193037	0.673411	0.0730796	-0.0793402	-0.227228	-0.250136	-0.202123	0.488365	-0.530611	0.334065	0.174225	M2 blue Presynapse|0.7153
LRP1B|Q9NZR2	blue	-0.00010599	0.714253	0.59837	-0.501479	0.0793844	0.108455	0.258509	-0.200174	-0.136395	-0.301001	0.169171	-0.443517	0.0549476	0.20437	0.121361	0.31209	-0.105054	-0.0537007	0.320703	0.0306689	-0.304685	0.318167	0.0662686	-0.09986	-0.0397273	0.0500134	-0.192777	0.367733	-0.404938	0.227484	-0.172455	M2 blue Presynapse|0.7143
HFE2|Q6ZVN8	blue	-0.184411	0.708593	0.652295	-0.362926	-0.104337	-0.145586	0.236628	-0.359509	0.0949731	-0.360906	0.0331028	-0.361064	0.257521	0.0536165	0.180534	0.370774	0.0425195	0.00570703	0.544619	-0.0193612	-0.0689335	0.408796	0.144636	-0.388199	-0.171814	-0.0511999	-0.305852	0.66967	-0.660108	0.296878	0.117415	M2 blue Presynapse|0.7086
AP2A2|O94973	blue	-0.120366	0.708414	0.543535	-0.435689	0.00889446	-0.105118	0.239611	-0.303196	0.0779669	-0.385559	-0.0240813	-0.534625	0.109854	-0.0422735	0.00275824	0.306023	0.00884235	0.0613062	0.507225	0.0970056	-0.280705	0.485399	0.158827	-0.267577	-0.101025	-0.0479178	-0.136379	0.439556	-0.601603	0.291836	-0.13612	M2 blue Presynapse|0.7084
RANBP3|Q9H6Z4	blue	0.188218	0.70585	0.581303	-0.556091	0.154291	0.29106	0.402049	-0.189181	-0.276039	-0.187813	0.357047	-0.531038	-0.241852	0.0908869	-0.0181162	0.156138	-0.475364	-0.0606842	0.0828128	0.210893	-0.564806	0.471774	-0.127486	0.198971	-0.0406567	-0.00471433	-0.128457	0.317477	-0.49089	0.467195	-0.106448	M2 blue Presynapse|0.7058
FLRT1|Q9NZU1	blue	0.254456	0.702323	0.417582	-0.447329	0.184385	0.200915	0.144543	-0.0784576	-0.080551	-0.107116	0.114437	-0.460486	-0.254974	-0.125927	-0.129153	0.106409	-0.263857	0.149949	0.193739	0.29627	-0.464747	0.690257	-0.061149	0.0209023	-0.219337	-0.209941	-0.172528	0.526452	-0.597224	0.197899	0.136283	M2 blue Presynapse|0.7023
PRKCB|P05771	blue	-0.0632672	0.699087	0.575011	-0.486585	0.0613744	0.0304536	0.353994	-0.319113	-0.128292	-0.37498	0.191162	-0.520131	0.023448	0.0995777	0.0949625	0.252103	-0.183393	-0.126126	0.302013	0.0567782	-0.384121	0.307753	0.0183594	-0.0396394	0.108739	0.105639	-0.0747231	0.395012	-0.56417	0.27451	-0.156652	M2 blue Presynapse|0.6991
EPHB3|P54753	blue	0.0457888	0.693937	0.606911	-0.496266	0.168413	0.335313	0.185778	-0.0417743	-0.400534	-0.189659	0.504267	-0.378334	0.118023	0.000124696	0.449852	0.187173	-0.228381	0.0719707	0.21555	-0.164984	-0.298392	0.404326	0.0814357	-0.140799	-0.202285	-0.229503	-0.334385	0.607851	-0.499582	0.331006	0.326773	M2 blue Presynapse|0.6939
PIANP|Q8IYJ0	blue	-0.166196	0.691665	0.461744	-0.371029	-0.0564158	-0.215442	0.045855	-0.254637	0.224356	-0.272996	-0.157257	-0.303396	0.27815	-0.0847555	0.0380371	0.414368	0.159077	0.197562	0.65263	0.0865232	-0.0189304	0.491142	0.194844	-0.42746	-0.267025	-0.061474	-0.253938	0.366026	-0.571294	0.176263	-0.265554	M2 blue Presynapse|0.6917
B3GALT2|O43825	blue	0.44229	0.691293	0.391468	-0.630365	0.408156	0.531092	0.0745117	0.163315	-0.412835	-0.0279065	0.381179	-0.395117	-0.343836	-0.0409873	0.0767268	0.0367929	-0.291816	0.100514	-0.0506977	0.18736	-0.510534	0.495868	-0.00567286	0.221187	-0.108809	-0.0816508	-0.103942	0.384328	-0.388236	0.288003	0.105489	M2 blue Presynapse|0.6913
TMX3|Q96JJ7	blue	-0.15421	0.690484	0.579748	-0.408356	-0.155781	-0.200791	0.171643	-0.385904	0.24615	-0.351268	-0.140921	-0.353706	0.210995	0.0490549	-0.0203074	0.483524	0.0691353	0.0636103	0.627799	0.144441	-0.0811357	0.496909	0.0648865	-0.359462	-0.259967	-0.0560558	-0.351263	0.541434	-0.661799	0.343342	-0.114456	M2 blue Presynapse|0.6905
CDKN2D|P55273	blue	0.186768	0.689885	0.60795	-0.521655	0.143238	0.17683	0.409327	-0.387888	-0.10858	-0.393579	0.221404	-0.596754	-0.312654	0.265433	-0.238852	0.188337	-0.341683	-0.225698	0.0746912	0.368802	-0.590047	0.366608	-0.13032	0.112664	-0.000893186	0.128569	-0.131104	0.517733	-0.568372	0.357673	-0.0385278	M2 blue Presynapse|0.6899
SYT11|Q9BT88	blue	-0.113635	0.687307	0.654547	-0.355936	-0.0060744	-0.0520008	0.325845	-0.367535	0.0822077	-0.267464	0.0954175	-0.445946	0.0792374	0.210628	0.0834219	0.228174	-0.149432	-0.0224733	0.371674	0.147303	-0.264474	0.452047	0.0724175	-0.260293	-0.190948	-0.09855	-0.377133	0.467408	-0.609302	0.275464	-0.0592197	M2 blue Presynapse|0.6873
TMEM2|Q9UHN6	blue	0.129546	0.686202	0.452162	-0.430158	0.0299925	0.0181294	0.0898958	-0.14349	0.111699	-0.0785207	-0.0464418	-0.302572	-0.0920006	0.0152241	-0.110023	0.254907	-0.108902	0.117906	0.311864	0.262948	-0.237065	0.555937	-0.0440909	-0.095661	-0.173581	-0.000616179	-0.224015	0.407788	-0.541727	0.176124	-0.0929485	M2 blue Presynapse|0.6862
LRFN2|Q9ULH4	blue	0.131501	0.686051	0.519041	-0.418321	0.181329	0.24095	0.211738	-0.148377	-0.264845	-0.206883	0.299863	-0.441219	-0.114992	0.0177644	0.0710908	0.0478342	-0.1944	-0.0509755	0.134718	0.112844	-0.423933	0.399225	-0.00474338	-0.059215	-0.0240565	-0.0811768	-0.0971696	0.602754	-0.531025	0.223171	0.149258	M2 blue Presynapse|0.6861
FAM19A4|Q96LR4	blue	0.29465	0.679846	0.327558	-0.527552	0.334853	0.371643	-0.0669169	-0.00473027	-0.194949	0.10911	0.315443	-0.207601	-0.160051	-0.11191	0.124843	0.155053	-0.260922	0.270719	0.0581589	0.24995	-0.327325	0.616253	0.0871486	-0.00375625	-0.360687	-0.249086	-0.340053	0.323501	-0.49801	0.28052	0.0282451	M2 blue Presynapse|0.6798
CADM1|Q9BY67	blue	0.244542	0.678783	0.496976	-0.551365	0.154805	0.225254	0.0833799	-0.12009	-0.125452	-0.0800994	0.227218	-0.253372	-0.13945	0.069396	-0.0128381	0.345806	-0.286094	0.0483665	0.159706	0.258196	-0.287872	0.539848	-0.0426444	0.0743245	-0.240587	-0.0469616	-0.308837	0.355389	-0.507584	0.456876	-0.0408777	M2 blue Presynapse|0.6788
C19orf10|Q969H8	blue	0.0317534	0.678191	0.552582	-0.412343	0.0169774	0.123285	0.135698	-0.160133	-0.126922	-0.100419	0.281762	-0.270064	0.087166	-0.0553421	0.226051	0.286668	-0.311865	0.118908	0.281119	0.0521585	-0.20745	0.560795	0.0291361	-0.0811403	-0.243395	-0.155685	-0.299308	0.426418	-0.548716	0.35643	0.0702457	M2 blue Presynapse|0.6782
RNASE1|P07998	blue	-0.122528	0.677923	0.59375	-0.331358	0.0163042	0.117515	0.255546	-0.461666	-0.146167	-0.232864	0.345694	-0.26071	0.131613	0.186455	0.276665	0.381341	-0.28995	-0.0666174	0.218104	0.0429025	-0.212197	0.344134	0.0593545	-0.197833	-0.216854	-0.0248402	-0.433475	0.257087	-0.540408	0.461388	-0.289185	M2 blue Presynapse|0.6779
NAGPA|Q9UK23	blue	-0.313602	0.676651	0.706729	-0.308589	-0.20936	-0.211528	0.305565	-0.342698	0.0639894	-0.380687	0.0809011	-0.297083	0.395386	0.0776613	0.302731	0.378327	0.0231083	-0.0653326	0.579172	-0.154788	0.0398397	0.343842	0.105889	-0.380233	-0.162913	-0.0259092	-0.340527	0.639811	-0.624002	0.275392	0.129473	M2 blue Presynapse|0.6767
GRB2|P62993	blue	0.2099	0.676384	0.435444	-0.487137	0.124457	0.166394	0.113012	-0.106294	-0.0636188	-0.0163974	0.130707	-0.316223	-0.194248	0.0121143	-0.111383	0.0901033	-0.284985	0.0289562	0.137275	0.284427	-0.367289	0.557319	-0.0699112	0.127916	-0.0479751	0.0242102	-0.105105	0.210005	-0.545451	0.377626	-0.254208	M2 blue Presynapse|0.6764
STMN2|Q93045	blue	0.0999664	0.671812	0.483505	-0.506816	0.123635	0.245144	0.194452	-0.1717	-0.219811	-0.138918	0.259075	-0.351102	-0.0376021	0.0522548	0.172353	0.273037	-0.272044	0.0724851	0.169073	0.0305841	-0.32437	0.451617	0.0534443	0.0256359	-0.0832761	0.08162	-0.171981	0.220478	-0.481888	0.3844	-0.214028	M2 blue Presynapse|0.6718
NUDT3|O95989	blue	-0.0746892	0.667536	0.55842	-0.366292	-0.150733	-0.0480252	0.224418	-0.249669	-0.0152649	-0.129807	0.17337	-0.243812	0.192379	-0.0601245	0.231839	0.590604	-0.282586	0.0495456	0.400304	0.0248568	-0.116314	0.564036	-0.0878011	-0.114184	-0.193643	-0.0413655	-0.268504	0.417799	-0.637659	0.371672	-0.0207079	M2 blue Presynapse|0.6675
DLL1|O00548	blue	0.0580537	0.662145	0.364174	-0.433419	0.111974	0.0859419	-0.0256332	0.00143173	-0.0267004	-0.237886	-0.0384721	-0.3176	0.0862846	-0.163605	0.0762026	0.26175	0.216731	0.253941	0.473009	-0.0354129	-0.115431	0.469475	0.23956	-0.332826	-0.248049	-0.147925	-0.182409	0.438925	-0.43896	0.14037	0.0410229	M2 blue Presynapse|0.6621
FGF12|P61328	blue	-0.072684	0.660923	0.574444	-0.416383	-0.222568	-0.0696491	0.227322	-0.207618	0.0319307	-0.226552	0.00535138	-0.330597	0.130101	0.0288311	0.070829	0.219601	-0.149163	-0.0258296	0.389006	-0.0641013	-0.137043	0.466782	-0.121238	-0.120852	-0.0785246	-0.045842	-0.141695	0.607457	-0.557861	0.293034	0.129113	M2 blue Presynapse|0.6609
PCSK1|P29120	blue	-0.0552859	0.660499	0.561326	-0.350385	0.0228163	-0.0214998	0.20359	-0.267759	-0.0276209	-0.221666	0.141033	-0.321012	0.0866541	0.120686	0.0849241	0.249567	-0.0873845	-0.0829889	0.313699	0.0922743	-0.191775	0.341323	0.0506653	-0.112009	-0.0463154	0.0625125	-0.249092	0.327835	-0.532147	0.317187	-0.223384	M2 blue Presynapse|0.6605
FLII|Q13045	blue	-0.0147264	0.65835	0.611406	-0.488743	0.0528892	0.150402	0.389621	-0.307225	-0.204707	-0.35805	0.281974	-0.480683	-0.0155158	0.247223	0.106249	0.187496	-0.242959	-0.147214	0.173632	0.0351618	-0.384215	0.269356	-0.0244441	-0.0450362	-0.00644479	0.0669441	-0.164865	0.31734	-0.404115	0.367905	-0.167117	M2 blue Presynapse|0.6583
STX1B|P61266	blue	-0.395858	0.657714	0.712732	-0.327369	-0.374565	-0.397357	0.335071	-0.433483	0.2316	-0.29886	-0.102904	-0.291943	0.456479	0.122935	0.213736	0.46017	-0.00453107	-0.0379054	0.672677	-0.139604	0.0883115	0.437012	0.0578564	-0.350705	-0.0733844	0.0860195	-0.253458	0.506017	-0.627873	0.372436	-0.0887597	M2 blue Presynapse|0.6577
GLO1|Q04760	blue	-0.162859	0.656647	0.519371	-0.463119	-0.0064091	-0.00422965	0.216752	-0.260928	-0.114107	-0.440729	0.138443	-0.397397	0.260758	-0.102925	0.287062	0.541949	0.054773	0.0882697	0.499184	-0.178977	-0.138853	0.338118	0.206	-0.324648	-0.1139	-0.0207053	-0.0961436	0.525969	-0.576169	0.253523	0.0692579	M2 blue Presynapse|0.6566
L1CAM|P32004	blue	-0.115693	0.656426	0.565422	-0.446897	0.128581	0.237317	0.0948534	-0.171758	-0.355137	-0.165228	0.50685	-0.196163	0.304907	-0.0202409	0.613897	0.276781	-0.117172	0.0217738	0.235767	-0.265868	-0.0927545	0.284125	0.224168	-0.27854	-0.192152	-0.117767	-0.375664	0.570398	-0.572601	0.265871	0.240044	M2 blue Presynapse|0.6564
SCARF1|Q14162	blue	0.0851141	0.655004	0.406507	-0.403347	0.0584902	0.0918877	0.11484	-0.206081	-0.0288099	-0.188429	0.101928	-0.268553	-0.0220379	-0.0834877	0.0128701	0.26947	-0.128671	0.128949	0.312642	0.1806	-0.20837	0.495091	0.0525627	-0.0837046	-0.237861	-0.135742	-0.20857	0.297163	-0.483974	0.297877	-0.140318	M2 blue Presynapse|0.655
SUMO2|P61956	blue	-0.146455	0.654664	0.481153	-0.481465	0.0345064	0.119742	0.164129	-0.209483	-0.235401	-0.331281	0.253015	-0.303596	0.233279	-0.0955754	0.365405	0.34626	-0.0192408	0.112642	0.383817	-0.266935	-0.133362	0.356805	0.212457	-0.232023	-0.126785	0.0287577	-0.167254	0.326993	-0.522175	0.262625	-0.0629285	M2 blue Presynapse|0.6547
LY96|Q9Y6Y9	blue	0.322519	0.651727	0.395267	-0.485742	0.366817	0.503828	0.0308559	0.010954	-0.421739	-0.0229073	0.492529	-0.29628	-0.210002	-0.043148	0.216176	0.081687	-0.308971	0.104795	-0.0524356	0.133562	-0.426802	0.399294	0.0393242	0.0451805	-0.230531	-0.142157	-0.274301	0.341357	-0.40656	0.309592	0.0442989	M2 blue Presynapse|0.6517
TLR4|O00206	blue	0.322966	0.650851	0.394195	-0.485558	0.366574	0.503486	0.0307368	0.0114311	-0.420612	-0.0224232	0.491183	-0.295822	-0.210734	-0.04324	0.216574	0.0818385	-0.30929	0.105826	-0.0532762	0.133211	-0.426204	0.399354	0.0402699	0.0453447	-0.230205	-0.140631	-0.273526	0.340914	-0.406246	0.309646	0.0446435	M2 blue Presynapse|0.6509
PTPRR|Q15256	blue	-0.186381	0.649868	0.415961	-0.314937	-0.0778148	-0.290309	-0.00226938	-0.216669	0.33268	-0.282552	-0.272068	-0.271679	0.275775	-0.153111	-0.0300415	0.369777	0.260266	0.204579	0.684681	0.0711501	0.0453785	0.530515	0.261958	-0.481396	-0.261728	-0.135397	-0.237663	0.544528	-0.589738	0.152497	-0.0070979	M2 blue Presynapse|0.6499
RBM22|Q9NW64	blue	0.131239	0.646974	0.604289	-0.5471	0.0824085	0.204525	0.225306	-0.124775	-0.241202	-0.0055448	0.357255	-0.240547	-0.0544208	0.253928	0.179526	0.144051	-0.35008	-0.156403	0.0500622	0.073786	-0.253239	0.313591	-0.0808438	0.117	-0.0376919	0.0961685	-0.304633	0.457595	-0.446487	0.357703	0.0882092	M2 blue Presynapse|0.647
TNFRSF18|Q9Y5U5	blue	0.0489699	0.642152	0.62024	-0.372417	-0.107698	0.142725	0.270036	-0.130886	-0.151735	-0.0764376	0.306382	-0.253545	0.00327787	0.121255	0.182804	0.0332439	-0.39607	-0.152302	0.140693	0.0177552	-0.202876	0.405571	-0.225987	0.0529271	-0.0319044	-0.0699204	-0.209261	0.47206	-0.521582	0.363803	0.102113	M2 blue Presynapse|0.6422
PCDHAC2|Q9Y5I4	blue	-0.0367612	0.641552	0.421541	-0.416019	0.183609	0.160175	-0.00263722	-0.108802	-0.147177	-0.151196	0.238104	-0.229458	0.187643	-0.0971243	0.308721	0.267048	0.00346288	0.233427	0.325473	-0.0538906	-0.116569	0.453713	0.276086	-0.26891	-0.28022	-0.174597	-0.308937	0.275368	-0.452928	0.271019	-0.0534589	M2 blue Presynapse|0.6416
CNTN4|Q8IWV2	blue	-0.211961	0.640791	0.418387	-0.410654	-0.126701	-0.253005	-0.0427363	-0.267509	0.261849	-0.182831	-0.106957	-0.136544	0.338483	-0.222563	0.107797	0.455761	0.0910936	0.195066	0.633543	0.0466916	0.109598	0.586125	0.20792	-0.398516	-0.320803	-0.128291	-0.321704	0.521183	-0.717925	0.271778	0.0524397	M2 blue Presynapse|0.6408
UCN3|Q969E3	blue	-0.236375	0.640768	0.62653	-0.337421	-0.0814014	0.143109	0.290083	-0.238994	-0.322873	-0.331286	0.423373	-0.371962	0.38327	0.113999	0.60553	0.32004	-0.130086	-0.0118834	0.309791	-0.406129	-0.161058	0.263765	0.132756	-0.29941	-0.0841073	0.00290171	-0.22309	0.353899	-0.427153	0.256495	-0.0759582	M2 blue Presynapse|0.6408
MMP16|P51512	blue	0.154183	0.632809	0.343433	-0.542397	0.172492	0.212864	-0.054775	-0.0276037	-0.153932	0.0376783	0.289407	-0.114666	-0.00927846	-0.108234	0.144471	0.303196	-0.181732	0.126926	0.117574	0.173341	-0.151381	0.493928	0.0300183	0.00688761	-0.289328	-0.194734	-0.302186	0.394637	-0.482511	0.379328	0.114809	M2 blue Presynapse|0.6328
ADAMTSL2|Q86TH1	blue	-0.0519277	0.632479	0.455307	-0.265367	0.0886256	0.0266759	-0.0300568	-0.160501	-0.00867312	-0.132885	0.107635	-0.226413	0.197341	-0.153462	0.217169	0.345602	0.0284916	0.212107	0.377221	0.0397464	-0.066237	0.479606	0.192019	-0.381398	-0.335374	-0.240431	-0.42366	0.577165	-0.592895	0.172917	0.206467	M2 blue Presynapse|0.6325
VAPA|Q9P0L0	blue	0.203214	0.628458	0.373902	-0.398915	0.137485	0.173048	0.0658436	-0.103791	-0.0824317	-0.157239	0.105626	-0.271121	-0.163393	-0.0527571	-0.0995533	0.422734	-0.102713	0.0679516	0.183125	0.265482	-0.261359	0.473738	-0.00386103	0.0360633	-0.233931	-0.0559932	-0.192107	0.332403	-0.430082	0.397414	-0.0563692	M2 blue Presynapse|0.6285
CASC4|Q6P4E1	blue	0.450588	0.626827	0.402882	-0.524521	0.303071	0.439096	0.103835	0.00375376	-0.258576	0.0477535	0.34574	-0.310913	-0.387739	0.0228579	-0.0891937	0.167127	-0.482609	0.0546102	-0.0764011	0.387512	-0.495281	0.573495	-0.130188	0.275343	-0.189615	-0.0912214	-0.233824	0.318313	-0.458759	0.371578	0.0473216	M2 blue Presynapse|0.6268
NXPH2|O95156	blue	0.0262644	0.626471	0.458946	-0.559878	0.0669356	0.179421	-0.0348035	-0.135139	-0.136403	0.0612399	0.328867	-0.0230818	0.114246	-0.0327341	0.280163	0.275948	-0.221781	0.0400192	0.157613	0.0400612	-0.047298	0.453093	-0.00830775	-0.108789	-0.283892	-0.141594	-0.420181	0.652645	-0.595018	0.336994	0.412799	M2 blue Presynapse|0.6265
MMP8|P22894	blue	-0.340599	0.625225	0.625213	-0.336058	-0.050399	-0.0428008	0.234114	-0.325977	-0.116165	-0.449095	0.181459	-0.346633	0.455625	0.155554	0.468425	0.352614	0.14819	-0.0470472	0.498736	-0.34563	-0.029537	0.20771	0.308915	-0.484324	-0.0792163	0.0287837	-0.277814	0.458248	-0.488206	0.185005	-0.0743409	M2 blue Presynapse|0.6252
TMEM59L|Q9UK28	blue	-0.26853	0.623046	0.5443	-0.340479	-0.201613	-0.190952	0.15333	-0.24227	0.137608	-0.298378	-0.072549	-0.267921	0.42058	0.00155778	0.245574	0.373953	0.13981	0.135093	0.665683	-0.174737	0.0769624	0.465499	0.171873	-0.45637	-0.196858	-0.100611	-0.232405	0.484861	-0.514193	0.180619	0.000515621	M2 blue Presynapse|0.623
TXN|P10599	blue	-0.0782981	0.620842	0.504068	-0.459169	-0.133743	-0.27662	0.180803	-0.148302	0.252254	-0.170465	-0.198532	-0.36799	0.148647	-0.0838855	-0.0402974	0.335471	-0.0213119	0.127059	0.555467	0.131936	-0.106246	0.589292	0.0522005	-0.2073	-0.0980582	-0.0358126	-0.0868295	0.563537	-0.636669	0.221693	0.127091	M2 blue Presynapse|0.6208
PDGFRA|P16234	blue	0.0269725	0.616063	0.34815	-0.376064	0.00281824	-0.043298	-0.0171445	-0.0197051	0.13992	-0.166258	-0.130813	-0.321504	0.150121	-0.272134	0.0436182	0.28717	0.0602719	0.365105	0.586865	0.0455997	-0.0843795	0.60696	0.147713	-0.300691	-0.289405	-0.252251	-0.144998	0.511601	-0.493239	0.15329	0.139719	M2 blue Presynapse|0.6161
BMX|P51813	blue	0.105007	0.611809	0.585114	-0.431779	-0.0742187	0.0722452	0.337839	-0.20902	-0.119687	-0.233442	0.123712	-0.431333	-0.0873078	0.207243	-0.0574677	0.133637	-0.307516	-0.124787	0.234059	0.098467	-0.352885	0.402217	-0.23509	0.0857161	-0.00799419	0.0778927	-0.148933	0.396746	-0.451887	0.270779	-0.0626695	M2 blue Presynapse|0.6118
PSG5|Q15238	blue	0.00259109	0.610065	0.619141	-0.405248	0.0639919	0.270264	0.292158	-0.203626	-0.334992	-0.139059	0.525805	-0.293158	0.0469887	0.125345	0.347208	0.14673	-0.386292	-0.101832	0.0847213	-0.0360232	-0.264031	0.353512	-0.0285094	0.0491235	-0.100133	-0.0836764	-0.284506	0.377883	-0.444091	0.629542	0.0695408	M2 blue Presynapse|0.6101
HTN1|P15515	blue	0.0930978	0.60361	0.506932	-0.339686	0.00893675	0.148279	0.255989	-0.153602	-0.0719154	-0.226524	0.164234	-0.372797	-0.0782296	0.118849	0.00180273	0.157157	-0.213565	-0.0470673	0.197138	0.182209	-0.323727	0.383457	-0.111447	-0.0258484	-0.126256	-0.0878337	-0.22834	0.421409	-0.415669	0.268777	-0.00423543	M2 blue Presynapse|0.6036
ERLEC1|Q96DZ1	blue	-0.178049	0.601696	0.546412	-0.241909	-0.0852485	-0.123475	0.232214	-0.416075	0.159841	-0.184721	0.103304	-0.277503	0.160008	0.114584	0.119049	0.265629	-0.212811	-0.0606365	0.327254	0.17524	-0.145892	0.463327	0.0497309	-0.21877	-0.216357	-0.11969	-0.373689	0.326407	-0.647163	0.404952	-0.204369	M2 blue Presynapse|0.6017
KIRREL2|Q6UWL6	blue	0.50685	0.594765	0.383878	-0.474698	0.464568	0.56338	0.131829	-0.00508942	-0.385859	-0.105043	0.430482	-0.424955	-0.43657	0.0471786	-0.0765364	0.0289394	-0.38963	0.0652735	-0.12626	0.372421	-0.598172	0.37312	-0.0382378	0.158548	-0.222988	-0.121253	-0.242938	0.349008	-0.370787	0.330085	0.0368672	M2 blue Presynapse|0.5948
ALDOA|P04075	blue	-0.0282106	0.593541	0.426359	-0.464308	-0.00251455	0.10143	0.198047	-0.251598	-0.158783	-0.272393	0.253476	-0.276412	0.0558906	-0.029248	0.180179	0.388739	-0.20211	-0.0417731	0.21607	0.0174612	-0.212754	0.307833	0.0378325	0.009189	-0.0185981	0.112613	-0.0627318	0.162725	-0.496238	0.363318	-0.275024	M2 blue Presynapse|0.5935
MTPAP|Q9NVV4	blue	0.200748	0.593185	0.380721	-0.40802	0.274557	0.165446	0.0261834	-0.075018	-0.0123773	-0.0748604	0.0962705	-0.310373	-0.0571262	-0.100599	0.0453929	0.307489	-0.0878734	0.268014	0.285937	0.282788	-0.25131	0.479322	0.189607	-0.145753	-0.305823	-0.211222	-0.277705	0.398016	-0.474045	0.218353	0.0066317	M2 blue Presynapse|0.5932
CAMK1D|Q8IU85	blue	0.00967653	0.59239	0.475269	-0.373257	0.0853978	0.151209	0.209226	-0.191886	-0.141915	-0.205896	0.211146	-0.356603	0.0931463	-0.0373408	0.273898	0.282534	-0.198242	0.134906	0.274847	-0.0500509	-0.216469	0.393709	0.153188	-0.178923	-0.174047	-0.078209	-0.196817	0.407034	-0.509331	0.304021	0.00594184	M2 blue Presynapse|0.5924
ARL8B|Q9NVJ2	blue	0.115405	0.59088	0.523683	-0.451129	0.20387	0.107351	0.225272	-0.352362	-0.0186385	-0.134946	0.214458	-0.308885	-0.140624	0.279222	-0.0638829	0.259106	-0.274224	-0.164905	0.0810529	0.391811	-0.316979	0.34589	0.0111912	-0.0349117	-0.162293	0.0586444	-0.363661	0.47178	-0.523103	0.337365	0.0153101	M2 blue Presynapse|0.5909
KLHL12|Q53G59	blue	-0.059814	0.590106	0.480915	-0.405904	-0.0772157	0.179027	0.185306	-0.0794148	-0.262257	-0.300774	0.217791	-0.301571	0.195078	-0.0602983	0.321956	0.186454	-0.0845815	0.0186567	0.322963	-0.290133	-0.146082	0.316435	-0.0229057	-0.171334	-0.00358805	0.0126791	-0.0187808	0.469317	-0.458343	0.176851	0.0934476	M2 blue Presynapse|0.5901
NDRG4|Q9ULP0	blue	-0.119926	0.589004	0.491933	-0.512889	-0.0298095	-0.0399355	0.0707137	-0.351396	0.0976887	0.00329336	0.131308	-0.107262	0.140812	0.108437	0.164663	0.301738	-0.232023	-0.0120934	0.236464	0.12051	-0.0460493	0.495186	0.0651293	-0.153262	-0.218434	0.0200073	-0.430603	0.473548	-0.703575	0.406423	0.0680817	M2 blue Presynapse|0.589
UNC5B|Q8IZJ1	blue	0.0473532	0.583635	0.296194	-0.407281	0.031541	-0.0283503	-0.114006	-0.151988	0.15379	-0.0510729	-0.0561008	-0.0405082	0.104738	-0.175508	0.0551509	0.469257	-0.0261677	0.3019	0.41748	0.195051	0.0600796	0.57672	0.14339	-0.209679	-0.400631	-0.0875713	-0.330125	0.154205	-0.480966	0.396549	-0.190363	M2 blue Presynapse|0.5836
PRKAR1B|P31321	blue	-0.0364975	0.578528	0.413651	-0.399448	0.17741	0.216784	-0.0432171	0.00924579	-0.279004	-0.0154846	0.3961	-0.135502	0.312052	-0.152336	0.607571	0.3046	-0.0669755	0.238857	0.267569	-0.218013	-0.0142005	0.355942	0.310489	-0.259465	-0.242153	-0.19215	-0.283659	0.347496	-0.440584	0.344666	0.127082	M2 blue Presynapse|0.5785
PCDHGA12|O60330	blue	0.0433436	0.577429	0.421236	-0.372419	0.205651	0.322409	0.0262191	-0.0807262	-0.327976	-0.0979751	0.423815	-0.17273	0.0984859	0.0173682	0.370207	0.193706	-0.129236	0.123094	0.101873	-0.0886349	-0.176349	0.323163	0.153359	-0.134433	-0.238056	-0.129344	-0.323863	0.164919	-0.333034	0.292076	-0.104498	M2 blue Presynapse|0.5774
PAK6|Q9NQU5	blue	-0.252302	0.576664	0.583572	-0.365518	-0.150071	-0.192459	0.260654	-0.303564	0.115749	-0.239845	0.0781428	-0.283781	0.311931	0.0646674	0.271956	0.471954	-0.131514	-0.0211612	0.475285	-0.0620774	-0.0323047	0.385934	0.107952	-0.244789	-0.122126	-0.0736411	-0.250823	0.563801	-0.558915	0.499482	0.124672	M2 blue Presynapse|0.5767
NELL1|Q92832	blue	-0.206257	0.576187	0.564904	-0.252776	-0.108198	-0.132422	0.273421	-0.291129	0.0478081	-0.414667	0.00632921	-0.365884	0.218474	0.125648	0.136333	0.27538	0.104216	-0.0764708	0.463212	-0.093756	-0.0828209	0.255688	0.102926	-0.365288	-0.08029	0.0328251	-0.203271	0.521726	-0.503183	0.196609	0.0177552	M2 blue Presynapse|0.5762
METTL1|Q9UBP6	blue	-0.0237316	0.573247	0.504429	-0.463661	0.154632	0.183544	0.197484	-0.094608	-0.237475	-0.16479	0.336466	-0.338969	0.207407	-0.000695425	0.438393	0.246578	-0.182197	0.171203	0.28991	-0.110823	-0.182947	0.394085	0.28574	-0.118961	-0.150172	-0.0982578	-0.175417	0.319644	-0.384266	0.453163	0.038257	M2 blue Presynapse|0.5732
GJD2|Q9UKL4	blue	0.0211529	0.572509	0.575302	-0.443406	-0.0342972	0.0770312	0.269232	-0.133866	-0.151675	-0.163801	0.250065	-0.3021	0.033841	0.113773	0.132811	0.272447	-0.198593	-0.0650478	0.252252	0.0173738	-0.191115	0.363574	-0.0693029	0.0425816	-0.0296346	-0.021327	-0.171509	0.379638	-0.396433	0.499707	0.0661952	M2 blue Presynapse|0.5725
POR|P16435	blue	-0.0927413	0.571217	0.428844	-0.356684	-0.0769688	-0.108132	0.09158	-0.165316	0.0825508	-0.268157	-0.0477197	-0.249263	0.163075	-0.102712	0.0734837	0.386611	0.0431229	0.0777279	0.450859	-0.0123696	-0.011543	0.40571	0.0702738	-0.197046	-0.0934642	-0.0325792	-0.0945817	0.482096	-0.490039	0.29057	0.0974411	M2 blue Presynapse|0.5712
STX7|O15400	blue	-0.290815	0.571165	0.58907	-0.329111	-0.287679	-0.259725	0.239939	-0.441164	0.158563	-0.298259	0.0148095	-0.128207	0.31623	0.174207	0.0985203	0.396399	-0.00271365	-0.178414	0.483279	-7.68e-05	0.101476	0.2957	-0.035789	-0.228675	-0.138599	0.15984	-0.353209	0.286243	-0.579692	0.347775	-0.243428	M2 blue Presynapse|0.5712
FZD10|Q9ULW2	blue	0.151523	0.565837	0.427161	-0.363399	0.217605	0.222769	0.120565	-0.0864921	-0.134991	-0.0625602	0.191454	-0.312599	-0.0334987	0.0297641	0.142621	0.10977	-0.182831	0.12165	0.195394	0.160721	-0.285806	0.423876	0.106873	-0.128222	-0.177853	-0.0866213	-0.240307	0.41723	-0.432005	0.213058	0.0538705	M2 blue Presynapse|0.5658
CD59|P13987	blue	-0.0073248	0.563203	0.275827	-0.305243	0.116691	0.0513265	-0.168965	-0.0695984	0.000100124	-0.141396	0.0291059	-0.0765901	0.192297	-0.25146	0.169083	0.389928	0.173515	0.29401	0.441001	-0.00242043	0.0611805	0.51187	0.287191	-0.318534	-0.34641	-0.144547	-0.299826	0.234612	-0.460491	0.246127	-0.088419	M2 blue Presynapse|0.5632
RABEPK|Q7Z6M1	blue	0.00341784	0.559542	0.392352	-0.188123	0.0308537	0.135977	0.0305525	-0.0702042	-0.0778275	0.0113827	0.248106	-0.145893	0.136665	-0.146106	0.30679	0.168219	-0.24362	0.196155	0.23553	0.0200487	-0.0894329	0.478478	0.0765516	-0.125179	-0.272558	-0.232494	-0.29822	0.351137	-0.442152	0.4403	0.0749436	M2 blue Presynapse|0.5595
HEXIM2|Q96MH2	blue	0.38931	0.557002	0.437544	-0.396858	0.129533	0.351746	0.1759	0.172513	-0.299673	0.0117216	0.281288	-0.351499	-0.283238	0.0888543	-0.0184898	0.0229111	-0.359396	-0.0226064	-0.0175235	0.138243	-0.438499	0.374252	-0.261337	0.254651	-0.0449694	-0.0640373	-0.130333	0.284098	-0.254575	0.23553	0.00894352	M2 blue Presynapse|0.557
HSPA6|P17066	blue	-0.251674	0.556279	0.452711	-0.377848	-0.0635329	-0.0635345	-0.0467316	-0.154447	0.0678236	0.00668925	0.175331	-0.0178145	0.457467	-0.154591	0.492113	0.283801	-0.0280469	0.251348	0.468577	-0.150057	0.193789	0.469644	0.282962	-0.402724	-0.335313	-0.251496	-0.389884	0.415707	-0.561975	0.559236	0.129994	M2 blue Presynapse|0.5563
CCL1|P22362	blue	-0.102214	0.554882	0.45676	-0.403992	0.00931341	0.000949437	0.157257	-0.235345	-0.0513043	-0.177951	0.174126	-0.18932	0.208065	0.113416	0.258242	0.565777	-0.0433361	0.055847	0.332073	0.0254516	-0.0722448	0.339919	0.119368	-0.199304	-0.254448	-0.00136734	-0.322527	0.282852	-0.435166	0.187163	-0.117911	M2 blue Presynapse|0.5549
XPNPEP1|Q9NQW7	blue	0.00308633	0.553163	0.383566	-0.496425	0.0234401	-0.0172866	0.131442	-0.23859	0.0230898	-0.174557	0.0877084	-0.3156	-0.00583697	-0.120299	-0.0450856	0.487162	-0.15281	0.0377321	0.298557	0.190979	-0.236946	0.421971	0.0142022	-0.081281	-0.0958447	-0.0780752	-0.112042	0.501981	-0.555076	0.339902	0.153565	M2 blue Presynapse|0.5532
EPHB2|P29323	blue	0.405846	0.544591	0.289913	-0.361671	0.335319	0.442711	-0.0290825	0.0629771	-0.285572	0.0489276	0.333888	-0.193413	-0.318633	-0.035312	0.00273593	0.00680606	-0.244567	0.12529	-0.0636286	0.286542	-0.358982	0.387931	-0.0420461	0.10749	-0.242809	-0.20206	-0.29907	0.204283	-0.322513	0.205569	-0.0329746	M2 blue Presynapse|0.5446
PRSS3|P35030	blue	0.507253	0.541692	0.302314	-0.474733	0.358044	0.504584	-0.00129279	0.119038	-0.323931	0.0176391	0.327127	-0.2674	-0.373877	-0.0301013	-0.0475443	0.110464	-0.360433	0.140233	-0.0685974	0.310787	-0.416141	0.45385	-0.0955945	0.206621	-0.232621	-0.12771	-0.198511	0.214051	-0.294005	0.416114	0.0425404	M2 blue Presynapse|0.5417
FCER2|P06734	blue	0.000805	0.539666	0.388495	-0.285515	0.0721783	0.0758731	-0.0662284	-0.135613	-0.0425356	-0.0790031	0.129672	-0.111171	0.141166	-0.0616879	0.154034	0.204685	-0.00936133	0.134382	0.312151	0.0460301	-0.0266558	0.367315	0.0475446	-0.289585	-0.400797	-0.16654	-0.409106	0.443478	-0.498764	0.193051	0.0873696	M2 blue Presynapse|0.5397
SST|P61278	blue	0.0237932	0.538841	0.511159	-0.427603	0.150149	0.230732	0.078972	-0.239317	-0.220222	-0.0650982	0.378536	-0.162929	0.0787616	0.252332	0.264912	0.174154	-0.213802	-0.0874382	0.0797305	0.0342684	-0.202273	0.145	0.053737	-0.110515	-0.2119	0.0557172	-0.472147	0.349148	-0.457492	0.159673	-0.085184	M2 blue Presynapse|0.5388
HBQ1|P09105	blue	-0.186677	0.536678	0.474334	-0.39293	-0.137214	-0.0922425	0.0569632	-0.334448	0.120384	-0.0966071	0.116918	-0.0291247	0.283496	0.0574809	0.197645	0.390001	-0.0795927	0.0322952	0.384852	0.0257371	0.12322	0.40688	0.0613358	-0.216687	-0.22025	0.0198313	-0.363241	0.334947	-0.541064	0.38262	-0.0689512	M2 blue Presynapse|0.5367
PDXP|Q96GD0	blue	-0.0348514	0.531372	0.513588	-0.366164	0.0733328	0.004462	0.407129	-0.285952	-0.119993	-0.485083	0.135118	-0.550596	-0.0658985	0.159209	-0.0600217	0.116843	-0.130436	-0.221496	0.218005	0.0726394	-0.388252	0.25818	-0.0166622	0.00447438	0.138812	0.124465	0.0451006	0.401948	-0.412978	0.23146	0.00291458	M2 blue Presynapse|0.5314
LRP8|Q14114	blue	-0.186092	0.529749	0.421799	-0.350384	-0.0265484	0.0256647	-0.0420323	-0.0892907	-0.0844674	-0.100808	0.170675	-0.106042	0.415433	-0.147797	0.549628	0.284002	0.0331956	0.219765	0.424494	-0.305382	0.114743	0.391638	0.271412	-0.40226	-0.219076	-0.110615	-0.296479	0.572635	-0.530363	0.218622	0.309792	M2 blue Presynapse|0.5297
IGDCC3|Q8IVU1	blue	0.451445	0.526444	0.301878	-0.381782	0.344897	0.379212	0.0621089	0.0916161	-0.19221	-0.0819467	0.181444	-0.402838	-0.369612	-0.0598265	-0.149625	0.0907206	-0.224394	0.168923	0.0479783	0.344611	-0.463649	0.496658	-0.0318796	0.0935622	-0.251645	-0.24122	-0.182964	0.544941	-0.338611	0.261155	0.352325	M2 blue Presynapse|0.5264
FAM189A2|Q15884	blue	-0.0289208	0.525521	0.519169	-0.275759	-0.0307032	0.0180948	0.275227	-0.239106	-0.0724885	-0.205261	0.19862	-0.294293	-0.000753289	0.183135	0.0769906	0.158226	-0.183561	-0.168102	0.167338	0.0764825	-0.2288	0.25105	-0.100866	-0.06707	-0.0450735	0.0395393	-0.217364	0.355896	-0.431039	0.298337	-0.0531564	M2 blue Presynapse|0.5255
PRDX3|P30048	blue	-0.00739009	0.517576	0.431849	-0.418179	-0.0224253	-0.161562	0.257401	-0.18458	0.19269	-0.322737	-0.155258	-0.52847	-0.0316667	-0.089584	-0.149107	0.178431	-0.0338655	0.10647	0.43209	0.170534	-0.29061	0.498622	0.0653038	-0.0937563	0.0153499	0.0325036	0.0685008	0.506473	-0.569835	0.280556	0.120157	M2 blue Presynapse|0.5176
FHIT|P49789	blue	0.0331054	0.517404	0.480851	-0.396323	0.0605348	0.0141122	0.341245	-0.182644	-0.0673339	-0.260912	0.113385	-0.46459	-0.0235528	-0.0141971	0.0278263	0.336171	-0.184107	0.0633321	0.301977	0.0909144	-0.326123	0.366103	-0.00381593	0.0107393	0.000339318	-0.00697175	-0.0133665	0.414332	-0.455432	0.289753	0.105824	M2 blue Presynapse|0.5174
DLL4|Q9NR61	blue	0.242655	0.510033	0.475407	-0.301918	0.101672	0.325628	0.170655	0.0325623	-0.295234	0.083362	0.424425	-0.208945	-0.175454	-0.01972	0.152469	-0.0337283	-0.471437	-0.0459284	-0.0622125	0.120036	-0.305397	0.468734	-0.22386	0.193114	-0.139428	-0.263368	-0.228653	0.505341	-0.450052	0.380933	0.379299	M2 blue Presynapse|0.51
CALN1|Q9BXU9	blue	0.112261	0.508426	0.293054	-0.366298	0.260831	0.0100277	-0.129788	-0.078074	0.110432	-0.0390334	-0.0375847	-0.117458	0.117301	-0.202562	0.081604	0.370781	0.0678392	0.419982	0.425818	0.214478	0.0236238	0.54009	0.387301	-0.310681	-0.449131	-0.19036	-0.329537	0.388106	-0.473915	0.278752	0.102207	M2 blue Presynapse|0.5084
THSD1|Q9NS62	blue	0.396587	0.504763	0.312383	-0.400376	0.377057	0.497276	0.164225	-0.0564502	-0.312898	-0.118993	0.37404	-0.385042	-0.425296	0.0120159	-0.0779653	-0.0293982	-0.447569	0.00186319	-0.149964	0.36113	-0.552719	0.322194	-0.093765	0.159872	-0.107334	-0.0669175	-0.13386	0.362515	-0.354578	0.177394	0.0769119	M2 blue Presynapse|0.5048
SVEP1|Q4LDE5	blue	0.115979	0.503902	0.452888	-0.275149	0.0363072	0.0746396	0.213775	-0.0900212	-0.0750864	-0.236122	0.0974875	-0.293569	-0.118211	0.161975	-0.1146	0.163336	-0.123028	-0.130258	0.193073	0.179578	-0.231855	0.327534	-0.0971173	0.00448168	-0.117549	-0.058143	-0.19505	0.302364	-0.275767	0.201594	-0.0227855	M2 blue Presynapse|0.5039
TXNRD1|Q16881	blue	0.0104323	0.503314	0.290099	-0.536342	-0.0307502	-0.0115479	0.102276	-0.096921	-0.0266274	-0.176778	0.0348849	-0.218918	0.0549132	-0.260583	0.0334742	0.404046	-0.101719	0.141991	0.347247	0.0407305	-0.114125	0.434052	-0.00772698	0.0164277	-0.0716333	0.0146534	0.0395745	0.352237	-0.540807	0.263214	0.093085	M2 blue Presynapse|0.5033
ENPP5|Q9UJA9	blue	0.0160172	0.503122	0.277795	-0.261117	0.0434733	0.0438289	-0.0275096	-0.0533204	-0.0455686	-0.147224	0.0641	-0.194232	0.120887	-0.181014	0.116098	0.281703	0.0787355	0.155659	0.342752	0.0146803	-0.06782	0.354653	0.0839505	-0.165918	-0.168981	-0.163322	-0.142541	0.415623	-0.414049	0.0361805	0.0850566	M2 blue Presynapse|0.5031
CDH11|P55287	blue	0.146603	0.50305	0.450312	-0.370872	0.181229	0.377891	0.18756	0.00830933	-0.414173	-0.0918029	0.456257	-0.280191	-0.0279426	0.0956864	0.287699	0.0706887	-0.333022	-0.00319598	0.0162846	-0.083029	-0.34044	0.199683	-0.0939936	0.0188785	-0.0484055	-0.0546115	-0.159911	0.321074	-0.255881	0.127687	0.0802498	M2 blue Presynapse|0.503
MDH2|P40926	blue	-0.0271658	0.50173	0.442239	-0.46758	-0.0012495	0.0716981	0.126213	-0.131313	-0.17514	-0.240429	0.212422	-0.229642	0.1374	-0.0766596	0.218652	0.450339	-0.0830067	-0.01491	0.313294	-0.0696125	-0.0888764	0.274454	0.00254806	-0.0489116	-0.0352971	0.0126961	-0.0891058	0.515363	-0.503995	0.283509	0.221804	M2 blue Presynapse|0.5017
RAB22A|Q9UL26	blue	0.31832	0.494133	0.328523	-0.445616	0.205587	0.259239	0.0457822	0.140294	-0.169954	-0.0302519	0.135157	-0.317646	-0.248479	-0.0527218	-0.0961609	0.0024444	-0.13229	0.105689	0.0614635	0.192038	-0.344195	0.365789	-0.0570504	0.0538654	-0.0130609	-0.0695856	0.0528579	0.347097	-0.304615	0.197196	0.153077	M2 blue Presynapse|0.4941
PCDHGA10|Q9Y5H3	blue	0.307507	0.49313	0.266149	-0.384512	0.229641	0.35647	-0.0569086	0.0229915	-0.200175	0.100233	0.315886	-0.0856065	-0.218765	0.00126399	0.0290046	0.119596	-0.315201	0.10614	-0.0722786	0.266801	-0.25318	0.415051	-0.0577875	0.18032	-0.235309	-0.11674	-0.267084	0.0135614	-0.287544	0.373969	-0.193464	M2 blue Presynapse|0.4931
C10orf54|Q9H7M9	blue	0.226095	0.490053	0.404915	-0.39181	0.212528	0.386889	0.176113	-0.00693554	-0.362295	-0.0776359	0.440062	-0.290084	-0.169339	0.11367	0.179078	0.113159	-0.365266	-0.0292993	-0.0962346	0.0373444	-0.381532	0.269734	-0.0197276	0.180018	-0.0195625	-0.0160743	-0.141032	0.136224	-0.2586	0.402582	-0.0714252	M2 blue Presynapse|0.4901
CDC25A|P30304	blue	-0.178233	0.489048	0.42074	-0.236598	-0.36646	-0.124734	0.0162148	-0.0484215	0.0736928	0.0276769	0.00685447	0.00747724	0.366581	-0.10346	0.308102	0.282819	-0.0418511	0.116326	0.44627	-0.265819	0.198829	0.488777	-0.141384	-0.228476	-0.171374	-0.119094	-0.23917	0.394007	-0.441937	0.22402	0.14861	M2 blue Presynapse|0.489
LRRC37A2|A6NM11	blue	0.365492	0.483163	0.414272	-0.456898	0.0738382	0.319855	0.155144	0.154968	-0.246127	0.0500632	0.277564	-0.265523	-0.21769	0.0883315	0.00366614	0.0061352	-0.391716	-0.0107873	0.0350137	0.143589	-0.346011	0.425048	-0.268662	0.296241	-0.0388096	-0.0815529	-0.089105	0.305799	-0.280326	0.403776	0.0971299	M2 blue Presynapse|0.4832
PELI2|Q9HAT8	blue	0.33379	0.481372	0.345878	-0.493245	0.295191	0.420985	0.169683	0.0241989	-0.328068	-0.0083566	0.391257	-0.325078	-0.226206	0.025272	0.0772942	0.16129	-0.390731	0.0714473	-0.0330358	0.219191	-0.4288	0.38454	-0.00727954	0.148541	-0.122087	-0.0693115	-0.0564155	0.211968	-0.287669	0.231043	-0.0100394	M2 blue Presynapse|0.4814
KLRC3|Q07444	blue	0.0526969	0.474927	0.398788	-0.350162	0.14409	0.181881	0.182514	0.0435297	-0.236114	-0.154715	0.199626	-0.371265	0.0824036	0.0238032	0.289834	0.0440415	-0.104535	0.166343	0.212669	-0.179538	-0.244327	0.347226	0.195231	-0.124748	-0.0860293	-0.0691858	-0.0624062	0.259617	-0.258669	0.177254	0.0306256	M2 blue Presynapse|0.4749
NRG4|Q8WWG1	blue	0.0218195	0.472686	0.335907	-0.260414	0.125261	0.0597805	0.0360837	-0.11769	0.0441758	-0.114975	0.0546764	-0.238832	0.0573788	-0.029266	0.0593686	0.2618	-0.0266169	0.16247	0.255767	0.156515	-0.145887	0.423668	0.143134	-0.263957	-0.273098	-0.178743	-0.25916	0.337555	-0.394938	0.144233	0.0548022	M2 blue Presynapse|0.4727
BCL2L1|Q07817	blue	0.125755	0.472374	0.289257	-0.375874	0.0995758	0.12827	0.0271937	-0.0234155	-0.003697	-0.0571766	0.0534029	-0.279093	0.00340223	-0.120368	0.0800629	0.0828547	-0.128678	0.246561	0.279056	0.0917415	-0.176214	0.438866	0.105357	-0.0924772	-0.218263	-0.231702	-0.163302	0.335915	-0.437893	0.175551	0.0772262	M2 blue Presynapse|0.4724
DCBLD2|Q96PD2	blue	0.0965142	0.470348	0.202418	-0.301501	0.155285	0.217951	-0.110394	-0.0554116	-0.11884	-0.0376362	0.229381	-0.0196048	0.0613345	-0.294944	0.237789	0.379241	-0.0575044	0.253125	0.198852	0.0296517	-0.027193	0.441386	0.164838	-0.167115	-0.378779	-0.236121	-0.304259	0.340195	-0.426343	0.235714	0.150697	M2 blue Presynapse|0.4703
DNAJB9|Q9UBS3	blue	-0.102511	0.466307	0.403049	-0.344405	0.0385681	-0.0708855	0.11863	-0.290529	0.0539872	-0.334291	0.0101749	-0.228827	0.140981	0.13594	0.0381501	0.44718	0.148823	-0.00126435	0.353247	0.0491744	-0.0427526	0.155781	0.195189	-0.250677	-0.189126	0.0992182	-0.294649	0.236202	-0.355451	0.211609	-0.134248	M2 blue Presynapse|0.4663
HRSP12|P52758	blue	-0.119547	0.464144	0.435221	-0.271861	-0.0792394	-0.246397	0.275004	-0.202065	0.241178	-0.27478	-0.129877	-0.476758	0.0887474	-0.0281299	-0.0441874	0.193727	-0.0436999	0.0572017	0.45274	0.147328	-0.204627	0.435543	0.0963945	-0.147428	-0.0174406	-0.111096	-0.0405687	0.45481	-0.463888	0.241614	0.0914897	M2 blue Presynapse|0.4641
TRIO|O75962	blue	0.376534	0.452895	0.292528	-0.311106	0.172207	0.191019	0.10214	0.200692	-0.137769	0.0258419	0.0685102	-0.306608	-0.281585	-0.037081	-0.182329	-0.0408542	-0.14032	0.0354101	0.0592302	0.272551	-0.334287	0.406055	-0.174989	0.193776	-0.0265288	-0.176391	0.0262842	0.275966	-0.200632	0.18421	0.0612903	M2 blue Presynapse|0.4529
GABARAPL1|Q9H0R8	blue	-0.0643341	0.451428	0.321016	-0.362289	0.00608134	0.0538933	0.0838215	-0.146101	-0.101134	-0.211237	0.132778	-0.183264	0.171623	-0.0354831	0.190044	0.351468	-0.0283197	0.0484956	0.285951	-0.0797912	-0.0524947	0.226649	0.113054	-0.122213	-0.10023	0.0413436	-0.115566	0.129796	-0.327501	0.317182	-0.197796	M2 blue Presynapse|0.4514
TMEM119|Q4V9L6	blue	0.14256	0.448017	0.407258	-0.266055	0.0571015	0.143181	0.251772	-0.215873	-0.0263862	-0.20339	0.0760547	-0.35673	-0.171289	0.176401	-0.129359	0.105423	-0.171548	-0.0323685	0.119652	0.242356	-0.340875	0.306129	-0.0786462	-0.00522722	-0.112116	-0.026138	-0.157577	0.241243	-0.35328	0.340945	-0.158988	M2 blue Presynapse|0.448
HRC|P23327	blue	0.190199	0.446488	0.351151	-0.342254	0.122146	0.388782	0.171943	0.0511617	-0.381528	-0.0323724	0.434122	-0.271459	-0.110527	-0.00929358	0.247549	-0.071052	-0.443652	-0.00928501	-0.0503639	-0.0672081	-0.349709	0.303858	-0.169603	0.122044	-0.0989339	-0.153468	-0.149889	0.376588	-0.31564	0.153419	0.272777	M2 blue Presynapse|0.4465
GALNT2|Q10471	blue	0.342647	0.445158	0.353638	-0.424291	0.0929236	0.304911	0.100604	0.0598734	-0.178573	0.158849	0.360906	-0.090196	-0.261909	0.0526426	0.00731152	0.0326612	-0.516954	-0.0602385	-0.141464	0.296642	-0.258036	0.393042	-0.295677	0.329013	-0.0928437	-0.0892541	-0.17718	0.268863	-0.293772	0.400476	0.176372	M2 blue Presynapse|0.4452
DLD|P09622	blue	0.0361825	0.444447	0.360754	-0.404996	0.06229	0.0247449	0.126337	-0.0409817	-0.0775186	-0.246102	0.0992354	-0.255344	0.0673099	-0.00973502	0.0838682	0.285185	-0.0292631	-0.0107473	0.294615	0.054269	-0.122574	0.271295	0.0552226	-0.00698215	-0.0159687	-0.0201945	-0.0439902	0.295181	-0.329039	0.270217	-0.0274419	M2 blue Presynapse|0.4444
TNFSF12|O43508	blue	0.242859	0.442747	0.340982	-0.133965	0.197871	0.347755	0.121162	-0.162088	-0.266392	0.0358608	0.413499	-0.191281	-0.282103	0.0285826	0.0254707	-0.0246382	-0.490735	-0.0983813	-0.182673	0.303575	-0.393686	0.274534	-0.221685	0.151408	-0.194894	-0.19441	-0.383031	0.328777	-0.39973	0.313463	0.0886334	M2 blue Presynapse|0.4427
CNEP1R1|Q8N9A8	blue	0.00582384	0.439279	0.290312	-0.248096	-0.0564366	0.127099	-0.134325	0.102912	-0.112031	0.124967	0.137174	0.0445997	0.33382	-0.214173	0.430805	0.343482	-0.0500042	0.4092	0.391342	-0.232041	0.141176	0.415487	0.058988	-0.293362	-0.39991	-0.298709	-0.356665	0.331883	-0.326631	0.225112	0.182341	M2 blue Presynapse|0.4393
KLK15|Q9H2R5	blue	0.212497	0.438269	0.177611	-0.409541	0.248026	0.102187	-0.0824101	0.0819222	-0.0404698	0.032103	0.0494221	-0.202893	-0.125397	-0.285682	-0.0831359	0.118261	-0.0694254	0.240859	0.207811	0.221264	-0.192867	0.446224	0.0735099	-0.0439801	-0.177751	-0.200506	-0.0474047	0.371414	-0.405578	0.181832	0.212468	M2 blue Presynapse|0.4383
MDH1|P40925	blue	-0.0369532	0.438279	0.423057	-0.45474	-0.0318693	-0.0172805	0.297322	-0.270716	-0.0904434	-0.347632	0.147688	-0.300301	0.0212228	0.114818	0.0425792	0.368332	-0.155278	-0.169325	0.224013	0.0590252	-0.189269	0.188822	-0.0350995	0.101756	0.101143	0.206404	0.0203345	0.254799	-0.423338	0.288173	-0.11088	M2 blue Presynapse|0.4383
CER1|O95813	blue	0.375114	0.432428	0.254671	-0.278983	0.240293	0.359881	-0.0405184	0.035854	-0.160786	0.132585	0.26567	-0.127476	-0.292202	0.039194	-0.0596349	0.148776	-0.340437	0.0946152	-0.108215	0.341864	-0.314882	0.410512	-0.142617	0.147323	-0.330899	-0.222644	-0.366842	0.250692	-0.307558	0.261484	0.0710306	M2 blue Presynapse|0.4324
ERLIN1|O75477	blue	0.0634567	0.431799	0.289463	-0.271938	0.136574	-0.00740868	0.0387231	-0.200068	0.164042	-0.138276	-0.0539961	-0.185034	-0.0908477	0.0656411	-0.0931967	0.263764	-0.00646532	0.0788162	0.16113	0.292186	-0.10654	0.351058	0.14689	-0.169032	-0.241156	-0.0250023	-0.289763	0.215728	-0.369765	0.146227	-0.0951826	M2 blue Presynapse|0.4318
TRABD2A|Q86V40	blue	-0.0327193	0.430216	0.317868	-0.315063	0.120062	0.136129	-0.0471527	0.0468475	-0.184224	-0.182266	0.131493	-0.117256	0.221882	-0.0176963	0.240886	0.191869	0.230665	0.135023	0.328635	-0.193896	0.0222229	0.227879	0.243391	-0.310408	-0.227087	-0.156077	-0.229294	0.167809	-0.161597	0.0206121	-0.0669797	M2 blue Presynapse|0.4302
PLAUR|Q03405	blue	0.0444672	0.429738	0.326236	-0.293254	0.254971	0.304549	0.0551684	-0.0268255	-0.354902	-0.10926	0.373624	-0.169294	0.130749	-0.00589863	0.404708	0.160283	-0.0795696	0.1637	0.155472	-0.161978	-0.14267	0.174361	0.205845	-0.172988	-0.193191	-0.0714665	-0.222328	0.226049	-0.248621	0.122499	0.0024072	M2 blue Presynapse|0.4297
ADAM10|O14672	blue	0.365121	0.424389	0.288652	-0.449048	0.428294	0.33409	0.0399916	-0.0513842	-0.19847	-0.0317731	0.261094	-0.291674	-0.29723	0.0153325	-0.11516	0.179266	-0.265171	0.135384	-0.00937924	0.404671	-0.394634	0.340375	0.100241	0.129287	-0.199875	-0.109739	-0.178328	0.250548	-0.298099	0.417871	0.0752107	M2 blue Presynapse|0.4244
ENTPD6|O75354	blue	-0.244756	0.416155	0.432243	-0.304215	-0.0232922	-0.0773314	0.0706527	-0.293651	0.0330138	-0.165109	0.133045	-0.0574717	0.334199	0.0741904	0.241035	0.269847	0.0768994	-0.0326469	0.357043	-0.0284106	0.120544	0.188667	0.17727	-0.359565	-0.229724	-0.113256	-0.398236	0.407758	-0.457851	0.227607	0.10268	M2 blue Presynapse|0.4162
ESD|P10768	blue	0.0366405	0.4162	0.171686	-0.369171	0.0896669	0.0651529	-0.0930432	-0.0110835	-0.0290839	-0.0510444	0.065505	-0.107561	0.105925	-0.302891	0.146882	0.419056	0.0278683	0.244833	0.282314	0.0240788	-0.0359933	0.38681	0.176668	-0.163988	-0.176094	-0.114653	-0.023911	0.312783	-0.384485	0.207469	0.128414	M2 blue Presynapse|0.4162
GABARAPL2|P60520	blue	0.0927748	0.415999	0.353145	-0.356672	0.028764	0.0348284	0.221456	-0.250481	-0.0604701	-0.156856	0.126845	-0.256916	-0.132467	0.0968919	-0.196997	0.289204	-0.229674	-0.115997	0.131586	0.295548	-0.285227	0.283788	-0.140298	0.14621	-0.0818281	0.0604364	-0.0939852	0.0454183	-0.313676	0.356753	-0.294608	M2 blue Presynapse|0.416
NMRAL1|Q9HBL8	blue	-0.01193	0.414138	0.227353	-0.313173	0.0297968	-0.111754	-0.035775	-0.106712	0.208585	-0.144045	-0.153223	-0.16425	0.0875931	-0.17211	-0.0446742	0.337038	0.0817767	0.214962	0.385499	0.158985	0.0082594	0.449765	0.171576	-0.222959	-0.195368	-0.102969	-0.0811165	0.31096	-0.430636	0.155447	0.0103797	M2 blue Presynapse|0.4141
NTN4|Q9HB63	blue	-0.0358765	0.398747	0.329454	-0.351309	0.0603702	-0.0397311	0.102406	0.00121543	-0.00651013	-0.160997	-0.0143354	-0.240383	0.166051	-0.0549844	0.153842	0.188199	0.109912	0.172861	0.356467	-0.0810276	-0.0269898	0.260071	0.264827	-0.242787	-0.0761263	-0.014906	-0.0105571	0.332901	-0.231326	0.141439	0.100825	M2 blue Presynapse|0.3987
BIN1|O00499	blue	-0.0208483	0.397227	0.306544	-0.319128	-0.141797	-0.188964	0.153436	-0.260604	0.277462	-0.0907776	-0.134545	-0.114031	-0.0103579	0.0868609	-0.204111	0.306434	-0.179054	-0.100294	0.270706	0.338258	-0.0370749	0.370463	-0.125203	0.0636298	-0.0881367	0.0841182	-0.146864	0.255987	-0.407419	0.305487	-0.149339	M2 blue Presynapse|0.3972
FCAR|P24071	blue	0.399801	0.387025	0.259913	-0.438247	0.334918	0.276462	0.083236	-0.0217012	-0.172912	-0.0385521	0.189113	-0.274918	-0.340353	0.0835854	-0.202562	0.199554	-0.28059	0.0149798	-0.0413705	0.410936	-0.409446	0.303747	-0.0368228	0.220058	-0.175207	-0.0617713	-0.18528	0.214079	-0.248322	0.21959	-0.0143301	M2 blue Presynapse|0.387
NQO2|P16083	blue	-0.202403	0.383719	0.405494	-0.163208	-0.0624519	-0.188743	0.14702	-0.276026	0.105894	-0.157418	0.051315	-0.179133	0.249753	0.108233	0.185298	0.29025	-0.0929479	0.0115397	0.320499	0.0423888	-0.00361982	0.220699	0.104469	-0.29729	-0.185917	-0.0123714	-0.33112	0.313508	-0.359181	0.168973	-0.0187273	M2 blue Presynapse|0.3837
WFDC11|Q8NEX6	blue	0.165284	0.378744	0.278504	-0.210369	-0.0760203	0.162268	-0.000933554	0.00229261	-0.0630472	0.0983556	0.144158	-0.016016	-0.0361992	-0.0320498	0.0999007	0.0988283	-0.334945	0.0476723	0.0792751	0.0890095	-0.0592426	0.369488	-0.202865	0.0409353	-0.212539	-0.123333	-0.267043	0.239753	-0.315078	0.326377	0.0656275	M2 blue Presynapse|0.3787
FAM69C|Q0P6D2	blue	-0.0647551	0.369272	0.311256	-0.29492	-0.0581591	0.00141351	-0.0219054	-0.159939	0.0399461	-0.0109011	0.0914979	0.0753129	0.18685	0.002737	0.140654	0.325082	-0.00183059	0.0983778	0.282749	0.0390445	0.191661	0.319739	0.0157499	-0.187074	-0.270139	-0.0568566	-0.348658	0.287735	-0.366142	0.0916194	0.058985	M2 blue Presynapse|0.3693
NTN1|O95631	blue	0.297262	0.366781	0.286113	-0.451299	0.18641	0.361117	0.104216	0.143754	-0.320368	-0.000712015	0.238255	-0.245533	-0.169433	0.0751382	0.0781161	0.0698111	-0.177302	0.132867	-0.0409246	-0.0129891	-0.301443	0.230652	-0.0717657	0.114504	-0.0987125	-0.0191367	-0.0580364	0.172023	-0.09309	0.225606	0.0642452	M2 blue Presynapse|0.3668
MANEA|Q5SRI9	blue	-0.0739305	0.365073	0.244626	-0.238422	-0.00831598	-0.0769225	-0.0485555	-0.124497	0.140528	-0.0495651	-0.0568271	-0.0845314	0.167424	-0.140007	0.0177451	0.205767	0.0601896	0.160551	0.379205	0.136486	0.0309528	0.33783	0.111609	-0.247894	-0.200945	-0.142818	-0.205118	0.334859	-0.368293	0.210469	0.0696933	M2 blue Presynapse|0.3651
ALDOC|P09972	blue	0.0698499	0.360419	0.257228	-0.319943	-0.0513052	-0.0314374	-0.0323248	-0.0801424	0.0820269	-0.0770357	-0.0138511	-0.0560198	0.0460007	-0.0357278	-0.0312607	0.372135	-0.0762674	0.0710532	0.251397	0.180811	0.0206083	0.361666	-0.0131662	-0.0436302	-0.160205	0.00162544	-0.120529	0.0854734	-0.332231	0.350172	-0.161574	M2 blue Presynapse|0.3604
CDHR3|Q6ZTQ4	blue	-0.0939642	0.358215	0.336783	-0.24578	-0.14451	-0.121339	0.0994339	-0.365671	0.246149	-0.160418	-0.0743828	-0.17936	0.158416	0.0508105	-0.00866599	0.375158	-0.129557	0.0968206	0.383232	0.160705	-0.0526597	0.332244	0.0729387	-0.212798	-0.213592	-0.00396839	-0.254204	0.319123	-0.445058	0.310583	-0.0733198	M2 blue Presynapse|0.3582
GADD45GIP1|Q8TAE8	blue	-0.20795	0.348675	0.389016	-0.225423	-0.228568	-0.151967	0.123363	-0.382243	0.18098	-0.0988928	-0.0196542	-0.0901473	0.276137	0.0771504	0.076332	0.289774	-0.110403	0.057525	0.401979	0.027271	0.0577385	0.274113	0.053111	-0.228247	-0.193878	-0.0428899	-0.293958	0.258778	-0.401631	0.336464	-0.139136	M2 blue Presynapse|0.3487
SCARF2|Q96GP6	blue	-0.0732093	0.345223	0.264929	0.0434792	0.058538	0.0203298	0.134168	-0.0969168	-0.0793478	-0.383648	-0.0163376	-0.305435	0.122022	-0.0806701	0.0711578	0.133891	0.250145	0.0929238	0.328443	-0.099971	-0.10339	0.183665	0.183594	-0.342591	-0.136858	-0.109078	-0.0717964	0.169772	-0.148945	0.0235507	-0.114225	M2 blue Presynapse|0.3452
GLCE|O94923	blue	-0.156302	0.317548	0.307824	-0.0601412	-0.0926145	-0.108694	0.108115	-0.140748	0.0502143	-0.314197	-0.0324839	-0.185217	0.22216	0.0522056	0.0778597	0.232431	0.117746	-0.0283949	0.310064	-0.094551	0.0180824	0.14692	0.0957262	-0.256727	-0.110086	-0.0633518	-0.156938	0.206165	-0.176737	0.198701	-0.0906092	M2 blue Presynapse|0.3175
NRP1|O14786	blue	0.19145	0.317458	0.0917123	-0.11243	0.132084	0.102954	-0.0752512	-0.0134305	-0.0133763	0.00568386	0.00495859	-0.0610612	-0.145642	-0.0825815	-0.178635	0.0895279	-0.0424031	0.0795443	0.147986	0.253252	-0.131831	0.28417	-0.0355153	-0.00583981	-0.22638	-0.127157	-0.170149	-0.164009	-0.134417	0.0382681	-0.471198	M2 blue Presynapse|0.3175
ADAMTS4|O75173	blue	-0.0271887	0.311882	0.288743	-0.261527	-0.128033	-0.00095253	0.171782	-0.116531	-0.00282582	-0.197578	0.00939392	-0.228451	0.102901	0.136221	0.0555823	0.223813	-0.0848799	0.0241453	0.268145	-0.0359041	-0.135738	0.180345	-0.0686238	-0.165571	-0.0524095	0.0361101	-0.061156	0.205397	-0.20334	0.0813014	-0.0592125	M2 blue Presynapse|0.3119
MGAT4C|Q9UBM8	blue	0.186511	0.309655	0.254747	-0.277814	0.21978	0.26115	0.115514	0.111522	-0.220105	0.0579766	0.288282	-0.242227	-0.123935	-0.104484	0.129527	0.0353192	-0.216801	0.158624	0.0257442	0.133853	-0.251128	0.310297	0.0642192	0.0505231	-0.1494	-0.242688	-0.113527	0.259491	-0.206691	0.223821	0.232322	M2 blue Presynapse|0.3097
SHANK3|Q9BYB0	brown	-0.189631	0.706772	0.864104	-0.41602	-0.17	0.0643075	0.59786	-0.46152	-0.268785	-0.423685	0.426774	-0.479823	0.148999	0.410121	0.322943	0.262959	-0.376405	-0.364041	0.217888	-0.148218	-0.335919	0.220637	-0.143153	-0.0205352	0.0858436	0.194104	-0.251653	0.442732	-0.534704	0.37252	-0.140851	M3 brown Postsynapse/Glycosylation|0.8641
PVRL2|Q92692	brown	-0.187711	0.632419	0.857194	-0.220242	-0.21659	-0.0398355	0.668517	-0.545486	-0.0873881	-0.471663	0.31273	-0.537411	0.0663503	0.509943	0.131629	0.186532	-0.393892	-0.43362	0.19802	0.0138647	-0.384971	0.170006	-0.218517	-0.0415355	0.0764318	0.129352	-0.301323	0.436973	-0.485823	0.31284	-0.188084	M3 brown Postsynapse/Glycosylation|0.8572
XXYLT1|Q8NBI6	brown	-0.311572	0.674005	0.851989	-0.29869	-0.232443	-0.236367	0.628708	-0.585288	0.0907174	-0.642364	0.00481596	-0.650218	0.194837	0.448497	0.0284166	0.287199	-0.0851125	-0.333717	0.501193	-0.0169909	-0.314786	0.241433	0.0105907	-0.287567	0.0664028	0.178108	-0.207764	0.591071	-0.608185	0.275484	-0.175937	M3 brown Postsynapse/Glycosylation|0.852
THPO|P40225	brown	-0.420637	0.65753	0.848576	-0.295283	-0.205459	-0.0376436	0.518735	-0.484264	-0.219434	-0.460807	0.399943	-0.422212	0.457908	0.37688	0.592881	0.239889	-0.159657	-0.298438	0.359457	-0.415763	-0.132431	0.132064	0.0968482	-0.321653	0.0346767	0.111865	-0.327519	0.519356	-0.536312	0.376844	-0.0507331	M3 brown Postsynapse/Glycosylation|0.8486
SV2A|Q7L0J3	brown	-0.230807	0.600432	0.845803	-0.356798	-0.167356	-0.0601131	0.60969	-0.554176	-0.107515	-0.458129	0.233203	-0.540277	0.102184	0.636566	0.0897788	0.156152	-0.274245	-0.49532	0.219039	-0.021457	-0.375541	0.101516	-0.123959	-0.0531148	0.159368	0.310363	-0.272976	0.399681	-0.452108	0.288021	-0.257169	M3 brown Postsynapse/Glycosylation|0.8458
CHST1|O43916	brown	-0.127465	0.672432	0.845543	-0.371086	0.016199	0.0216767	0.627622	-0.479104	-0.144119	-0.604968	0.262273	-0.742568	0.00776881	0.500172	0.0424291	0.142347	-0.195775	-0.379841	0.263677	0.0602881	-0.53546	0.122443	-0.0126033	-0.158953	0.0842867	0.124082	-0.220832	0.626434	-0.490443	0.250173	-0.0449222	M3 brown Postsynapse/Glycosylation|0.8455
LRP11|Q86VZ4	brown	-0.28067	0.646892	0.843902	-0.346503	-0.119846	-0.0768617	0.562712	-0.608447	-0.0653297	-0.612494	0.204564	-0.561053	0.168499	0.557341	0.162026	0.298066	-0.121163	-0.429778	0.304856	-0.0705728	-0.332122	0.0699989	0.00511184	-0.267971	0.0696437	0.260182	-0.33222	0.663676	-0.602251	0.208358	-0.0282691	M3 brown Postsynapse/Glycosylation|0.8439
HTRA2|O43464	brown	-0.27355	0.656862	0.834446	-0.43785	-0.122224	-0.0797743	0.529267	-0.579116	-0.0516978	-0.517311	0.221198	-0.517927	0.201635	0.468583	0.195126	0.295337	-0.192637	-0.362494	0.334196	-0.0667379	-0.286443	0.178258	-0.00213826	-0.228319	0.0440763	0.229376	-0.324798	0.675679	-0.669495	0.301027	0.0475727	M3 brown Postsynapse/Glycosylation|0.8344
CYB5D2|Q8WUJ1	brown	-0.324363	0.615989	0.834297	-0.259142	-0.160904	-0.0114582	0.583973	-0.605416	-0.200277	-0.467255	0.434699	-0.451289	0.24104	0.544389	0.354419	0.22598	-0.28764	-0.455381	0.194387	-0.153832	-0.299094	0.0699169	-0.0708041	-0.176639	0.0447481	0.173097	-0.391398	0.411392	-0.479668	0.2632	-0.186225	M3 brown Postsynapse/Glycosylation|0.8343
RGMB|Q6NW40	brown	-0.307595	0.692228	0.833999	-0.35785	-0.160749	-0.051319	0.460442	-0.589839	-0.0690924	-0.54776	0.226758	-0.499222	0.292436	0.408271	0.2863	0.366254	-0.134962	-0.280411	0.428054	-0.167526	-0.247537	0.15452	0.0362586	-0.372729	-0.042185	0.131889	-0.396207	0.68859	-0.674961	0.225078	-0.0195916	M3 brown Postsynapse/Glycosylation|0.834
PPP3CA|Q08209	brown	-0.494301	0.543028	0.821566	-0.261473	-0.339089	-0.27457	0.713859	-0.632712	-0.0487875	-0.648816	0.149122	-0.560238	0.340308	0.427491	0.244677	0.21451	-0.144411	-0.460503	0.415193	-0.292128	-0.204844	0.026872	-0.0415133	-0.225522	0.232219	0.297108	-0.115852	0.556739	-0.525243	0.246429	-0.0222359	M3 brown Postsynapse/Glycosylation|0.8216
ST6GALNAC5|Q9BVH7	brown	-0.0699016	0.59488	0.820681	-0.383958	0.0135365	0.145326	0.605025	-0.349703	-0.338163	-0.428035	0.412146	-0.562898	0.00978898	0.600288	0.188426	0.0476994	-0.284867	-0.457692	0.0823875	-0.0838392	-0.448179	0.0113345	-0.110623	-0.0184265	0.180545	0.228737	-0.230118	0.48505	-0.322916	0.243842	-0.0500667	M3 brown Postsynapse/Glycosylation|0.8207
STX1A|Q16623	brown	-0.18057	0.785139	0.813302	-0.483363	-0.145526	-0.0230545	0.446011	-0.51511	-0.048457	-0.351454	0.197724	-0.441464	0.130794	0.35913	0.142948	0.263209	-0.277698	-0.243903	0.342567	0.00926175	-0.281871	0.353729	-0.102211	-0.155886	-0.0461046	0.136381	-0.369962	0.571297	-0.699063	0.349158	-0.133116	M3 brown Postsynapse/Glycosylation|0.8133
B4GALT2|O60909	brown	-0.242335	0.544886	0.808205	-0.252866	-0.144122	-0.0393577	0.68381	-0.536068	-0.174548	-0.644743	0.246436	-0.65332	0.106314	0.579106	0.107909	0.0864842	-0.156801	-0.498328	0.259405	-0.113397	-0.421471	-0.0163665	-0.0588758	-0.147079	0.196429	0.244715	-0.148412	0.507811	-0.411352	0.167175	-0.146037	M3 brown Postsynapse/Glycosylation|0.8082
UBE2V1|Q13404	brown	-0.299413	0.752609	0.805934	-0.387538	-0.130626	-0.0809157	0.628984	-0.561989	-0.103401	-0.665352	0.202577	-0.679997	0.199609	0.327617	0.213107	0.299396	-0.124574	-0.261277	0.430201	-0.136464	-0.389953	0.263667	0.108339	-0.232143	0.0481519	0.160148	-0.144178	0.497168	-0.620351	0.254135	-0.240938	M3 brown Postsynapse/Glycosylation|0.8059
FUT10|Q6P4F1	brown	-0.397978	0.452012	0.804342	-0.129633	-0.25403	-0.229444	0.728699	-0.586071	-0.0363201	-0.683548	0.145861	-0.5804	0.247794	0.562072	0.155126	0.205591	-0.0851473	-0.51544	0.328873	-0.161993	-0.257308	-0.077077	-0.0281595	-0.202477	0.231167	0.21372	-0.143488	0.52229	-0.387672	0.206718	-0.0427537	M3 brown Postsynapse/Glycosylation|0.8043
C11orf87|Q6NUJ2	brown	-0.402839	0.459056	0.792785	-0.18629	-0.36811	-0.224521	0.687929	-0.626297	-0.0627221	-0.584993	0.186964	-0.445336	0.216662	0.636965	0.0770927	0.14601	-0.145712	-0.637685	0.254436	-0.152833	-0.209204	-0.124364	-0.22311	-0.0958098	0.243372	0.326324	-0.213759	0.348004	-0.327639	0.196535	-0.242071	M3 brown Postsynapse/Glycosylation|0.7928
ATP1B1|P05026	brown	-0.513495	0.573437	0.792209	-0.126324	-0.348106	-0.199141	0.487707	-0.60014	-0.00498357	-0.504986	0.259334	-0.313911	0.465553	0.386144	0.420218	0.235847	-0.0937951	-0.400771	0.394262	-0.2684	-0.0294107	0.0825577	0.00303807	-0.383398	-0.000757638	0.0802945	-0.39682	0.515281	-0.562551	0.203424	-0.08964	M3 brown Postsynapse/Glycosylation|0.7922
NLGN1|Q8N2Q7	brown	-0.26135	0.572191	0.790908	-0.366666	-0.0936755	0.0182904	0.527969	-0.504942	-0.189553	-0.487663	0.379441	-0.534361	0.181779	0.331994	0.270169	0.186477	-0.252458	-0.322226	0.244483	-0.133687	-0.350296	0.0951618	-0.0355485	-0.229348	0.0311691	0.0257529	-0.278447	0.761993	-0.577051	0.308472	0.293727	M3 brown Postsynapse/Glycosylation|0.7909
CACNB4|O00305	brown	-0.0942362	0.509832	0.784133	-0.31438	-0.0841454	0.102521	0.765092	-0.389551	-0.317002	-0.538864	0.359274	-0.693009	-0.109051	0.613397	0.0828709	-0.0672612	-0.382179	-0.594001	0.000292908	-0.110114	-0.566675	-0.0631813	-0.212984	0.148254	0.406053	0.308771	0.00938874	0.445851	-0.285067	0.264254	-0.0657637	M3 brown Postsynapse/Glycosylation|0.7841
RAD23A|P54725	brown	-0.369726	0.647492	0.782833	-0.32959	-0.10666	0.041861	0.596221	-0.532756	-0.348401	-0.549801	0.495415	-0.485949	0.338077	0.359594	0.524734	0.296715	-0.189347	-0.332165	0.245296	-0.353247	-0.273791	0.0865484	0.102859	-0.18163	0.0926418	0.190375	-0.20106	0.365611	-0.473132	0.245369	-0.193371	M3 brown Postsynapse/Glycosylation|0.7828
TIMP3|P35625	brown	-0.316465	0.443467	0.781832	-0.259769	-0.215768	-0.100513	0.716961	-0.497208	-0.219393	-0.605531	0.233092	-0.537194	0.165828	0.705942	0.183696	0.083868	-0.135658	-0.627762	0.181602	-0.283125	-0.296014	-0.161896	-0.0777304	-0.0703414	0.31681	0.384373	-0.116235	0.422929	-0.25312	0.145663	-0.119213	M3 brown Postsynapse/Glycosylation|0.7818
CHRDL2|Q6WN34	brown	-0.406195	0.475577	0.781204	-0.156803	-0.248347	-0.0526299	0.550725	-0.59208	-0.202564	-0.402452	0.420913	-0.283116	0.346478	0.593518	0.389605	0.178083	-0.195175	-0.513465	0.190791	-0.233721	-0.119883	-0.0996047	-0.0706173	-0.185422	0.0553655	0.155546	-0.421861	0.262004	-0.34053	0.276792	-0.306953	M3 brown Postsynapse/Glycosylation|0.7812
NLGN2|Q8NFZ4	brown	-0.155846	0.644338	0.780992	-0.381084	-0.159051	-0.0923212	0.51135	-0.478954	0.0130979	-0.419491	0.138713	-0.569163	0.0530383	0.293824	0.00642791	0.21755	-0.271897	-0.25472	0.325611	0.0840615	-0.368802	0.300781	-0.109208	-0.163174	0.0157215	0.0232732	-0.220082	0.774175	-0.646878	0.366972	0.213676	M3 brown Postsynapse/Glycosylation|0.781
CCDC134|Q9H6E4	brown	-0.104117	0.489676	0.78008	-0.281807	-0.170085	0.0842695	0.653679	-0.423681	-0.242254	-0.354607	0.419611	-0.470757	0.00548988	0.583693	0.171351	0.0877479	-0.503317	-0.51511	0.0064756	-0.0313013	-0.394809	0.0383975	-0.302104	0.131219	0.202887	0.169562	-0.209853	0.402861	-0.340005	0.349729	-0.0276289	M3 brown Postsynapse/Glycosylation|0.7801
CHGA|P10645	brown	-0.298664	0.671502	0.773524	-0.395122	-0.103206	0.0228805	0.492895	-0.566005	-0.208607	-0.433274	0.35757	-0.413847	0.225657	0.517809	0.325004	0.218145	-0.218939	-0.405841	0.223269	-0.186786	-0.265647	0.0830585	0.00731846	-0.171427	0.02972	0.237834	-0.386963	0.412679	-0.529045	0.262312	-0.24241	M3 brown Postsynapse/Glycosylation|0.7735
UBTD2|Q8WUN7	brown	-0.239916	0.708469	0.77284	-0.384508	-0.212737	-0.175375	0.387055	-0.399237	0.0630036	-0.281439	0.120677	-0.403079	0.264745	0.146036	0.169685	0.365073	-0.197176	-0.0974692	0.482216	-0.0179382	-0.143537	0.483082	-0.0179864	-0.240261	-0.112016	-0.0283598	-0.299523	0.599282	-0.667726	0.405615	0.074225	M3 brown Postsynapse/Glycosylation|0.7728
VIP|P01282	brown	-0.257628	0.610635	0.772215	-0.356325	-0.106674	0.0219917	0.559396	-0.487387	-0.219967	-0.461048	0.378418	-0.522095	0.157347	0.536373	0.301525	0.107585	-0.271342	-0.444572	0.143935	-0.194581	-0.378791	0.0429954	-0.0182269	-0.0445472	0.175239	0.273404	-0.249725	0.300452	-0.427561	0.231757	-0.293691	M3 brown Postsynapse/Glycosylation|0.7722
PDIA6|Q15084	brown	-0.185526	0.642236	0.76833	-0.305934	-0.151607	-0.0187184	0.6245	-0.60385	-0.0949282	-0.549452	0.212213	-0.55958	0.0201806	0.476138	0.0117631	0.196998	-0.284169	-0.415955	0.250502	0.0392682	-0.400768	0.179565	-0.0999461	-0.0561897	0.106974	0.220972	-0.194464	0.399919	-0.485274	0.374253	-0.302067	M3 brown Postsynapse/Glycosylation|0.7683
FAM177A1|Q8N128	brown	-0.513711	0.561641	0.766468	-0.176784	-0.363936	-0.270509	0.397962	-0.530773	0.03536	-0.453595	0.132797	-0.271267	0.552722	0.276013	0.399772	0.357734	-0.00307266	-0.252369	0.553126	-0.3221	0.103177	0.163056	0.0414821	-0.454737	-0.0626802	0.0611824	-0.387134	0.567107	-0.547845	0.301498	0.0213128	M3 brown Postsynapse/Glycosylation|0.7665
ROR1|Q01973	brown	-0.170725	0.510435	0.765148	-0.186984	-0.107084	0.266566	0.560299	-0.35373	-0.531075	-0.415149	0.627323	-0.387898	0.148021	0.445074	0.462202	0.0332529	-0.338434	-0.486829	0.0095952	-0.353206	-0.324888	-0.0700717	-0.191179	-0.0360256	0.127581	0.0951074	-0.27822	0.477615	-0.307894	0.194832	0.0902204	M3 brown Postsynapse/Glycosylation|0.7651
BRSK2|Q8IWQ3	brown	-0.0856735	0.547648	0.764009	-0.372179	-0.000828088	0.124998	0.515312	-0.433296	-0.193745	-0.398506	0.344573	-0.52339	-0.0222864	0.653093	0.117012	0.0538109	-0.306563	-0.438479	0.0573375	0.00972493	-0.456036	0.0318897	-0.0666038	-0.003104	0.110362	0.235962	-0.314465	0.333975	-0.365432	0.256067	-0.224103	M3 brown Postsynapse/Glycosylation|0.764
PTPRD|P23468	brown	-0.172595	0.711274	0.764046	-0.400167	-0.118841	-0.053721	0.461571	-0.514802	-0.0178445	-0.437539	0.17737	-0.483585	0.121656	0.383849	0.0750539	0.296518	-0.226699	-0.283895	0.34222	0.0690129	-0.306936	0.290164	-0.039612	-0.167746	-0.0249138	0.168811	-0.286449	0.404285	-0.562254	0.377179	-0.306025	M3 brown Postsynapse/Glycosylation|0.764
EVL|Q9UI08	brown	-0.277669	0.619276	0.761119	-0.245787	-0.118347	-0.0945607	0.606825	-0.447845	-0.140862	-0.531759	0.213693	-0.588134	0.209873	0.320634	0.227798	0.227607	-0.138569	-0.269373	0.357672	-0.151508	-0.323473	0.187654	0.00628168	-0.187972	0.158456	0.152251	-0.106814	0.358378	-0.475239	0.204109	-0.212651	M3 brown Postsynapse/Glycosylation|0.7611
TMEM106B|Q9NUM4	brown	0.0466029	0.710958	0.760098	-0.43949	0.0132474	0.123431	0.455815	-0.27065	-0.211003	-0.327139	0.299234	-0.535206	-0.0678121	0.264053	0.0577718	0.130079	-0.298687	-0.246284	0.212673	0.0940751	-0.426914	0.34171	-0.107249	0.00146107	0.0234747	-0.0225528	-0.185212	0.661676	-0.508056	0.403562	0.164142	M3 brown Postsynapse/Glycosylation|0.7601
TP53I11|O14683	brown	-0.342588	0.671424	0.759859	-0.413313	-0.261518	-0.214701	0.407706	-0.563172	0.116337	-0.39471	0.117142	-0.366833	0.309731	0.235895	0.158844	0.341243	-0.155746	-0.19985	0.488274	-0.0272242	-0.0805143	0.359418	0.0171575	-0.246791	-0.0125381	0.135617	-0.268953	0.524263	-0.670255	0.540998	-0.0844604	M3 brown Postsynapse/Glycosylation|0.7599
MGAT1|P26572	brown	-0.636051	0.423478	0.759726	-0.0311722	-0.424446	-0.409685	0.689774	-0.695946	0.0652759	-0.66592	0.103603	-0.486387	0.523919	0.495419	0.32614	0.369132	-0.0455715	-0.437247	0.488141	-0.322001	-0.0953622	-0.0391223	0.049841	-0.359373	0.150795	0.236914	-0.178877	0.370561	-0.402356	0.177855	-0.244905	M3 brown Postsynapse/Glycosylation|0.7597
SLITRK5|O94991	brown	-0.0814841	0.731627	0.754927	-0.282681	-0.0284659	0.0451783	0.518121	-0.478151	-0.0709184	-0.456163	0.231034	-0.630519	-0.0324663	0.248678	0.0396782	0.183308	-0.306421	-0.217579	0.280211	0.142018	-0.48857	0.329883	-0.0703924	-0.142049	-0.0342277	-0.00386029	-0.281168	0.599091	-0.66412	0.277804	-0.088511	M3 brown Postsynapse/Glycosylation|0.7549
FREM2|Q5SZK8	brown	-0.611684	0.471834	0.749881	-0.19082	-0.353102	-0.337633	0.565627	-0.660266	0.115005	-0.472673	0.199212	-0.342478	0.510265	0.398483	0.386687	0.29186	-0.132082	-0.347496	0.418253	-0.257313	-0.00912333	0.0720243	0.1236	-0.331218	0.0596441	0.130336	-0.29816	0.436748	-0.513217	0.367105	-0.0712356	M3 brown Postsynapse/Glycosylation|0.7499
NBL1|P41271	brown	-0.367199	0.656939	0.749839	-0.244913	-0.111274	-0.0198459	0.440366	-0.688705	-0.0910434	-0.420953	0.377906	-0.360248	0.310531	0.421072	0.411299	0.317022	-0.250417	-0.298125	0.279075	-0.122722	-0.213287	0.157676	0.101134	-0.312592	-0.102001	0.0994262	-0.500949	0.351226	-0.580885	0.305164	-0.350003	M3 brown Postsynapse/Glycosylation|0.7498
RQCD1|Q92600	brown	-0.200933	0.576538	0.747656	-0.303148	-0.111333	-0.0280858	0.690783	-0.384234	-0.232386	-0.616997	0.251223	-0.704963	0.0569975	0.314744	0.118406	0.0261073	-0.213723	-0.409134	0.248961	-0.16087	-0.449188	0.12196	-0.0943935	-0.020439	0.280056	0.157016	0.041181	0.536178	-0.416286	0.285022	0.0439867	M3 brown Postsynapse/Glycosylation|0.7477
TNRC6B|Q9UPQ9	brown	-0.393209	0.671916	0.74505	-0.429881	-0.317155	-0.142493	0.483178	-0.543056	-0.0427097	-0.460544	0.219068	-0.433709	0.366917	0.202926	0.334607	0.391589	-0.210538	-0.182957	0.458714	-0.249914	-0.142784	0.291507	-0.0570232	-0.219988	0.0295365	0.220166	-0.209375	0.394922	-0.61324	0.397742	-0.17344	M3 brown Postsynapse/Glycosylation|0.7451
MAZ|P56270	brown	-0.626526	0.397369	0.743901	-0.129965	-0.354673	-0.214639	0.564789	-0.639776	-0.11096	-0.548954	0.326237	-0.331789	0.567125	0.571655	0.575597	0.252583	-0.084596	-0.482241	0.295798	-0.498261	-0.0345677	-0.158392	0.0815036	-0.356985	0.165106	0.269539	-0.278062	0.323425	-0.374141	0.11969	-0.19684	M3 brown Postsynapse/Glycosylation|0.7439
CRYZL1|O95825	brown	-0.185981	0.636657	0.743465	-0.448795	-0.0461201	0.114964	0.410698	-0.38437	-0.270377	-0.338983	0.474319	-0.376414	0.192083	0.267704	0.390249	0.18883	-0.257241	-0.246049	0.205552	-0.153495	-0.227755	0.21757	0.0598136	-0.0934903	0.0429082	0.0857318	-0.252803	0.44989	-0.526111	0.639374	0.00222047	M3 brown Postsynapse/Glycosylation|0.7435
CHCHD10|Q8WYQ3	brown	-0.0464633	0.693276	0.742683	-0.469009	-0.0199604	0.0129462	0.444861	-0.448627	-0.0447582	-0.372033	0.196097	-0.526756	-0.026479	0.413814	-0.0365005	0.316121	-0.275932	-0.299353	0.253455	0.187072	-0.420204	0.288628	-0.0918311	-0.00429584	0.0454129	0.163689	-0.264809	0.411046	-0.572291	0.363633	-0.259188	M3 brown Postsynapse/Glycosylation|0.7427
NTS|P30990	brown	-0.323883	0.502132	0.740511	-0.251606	-0.256168	-0.210427	0.505848	-0.603171	0.0515031	-0.322848	0.159495	-0.301648	0.233205	0.52109	0.150696	0.275105	-0.25297	-0.391786	0.262724	-0.0276678	-0.113075	0.0939391	-0.0910946	-0.201125	-0.00655533	0.198674	-0.37476	0.394648	-0.472089	0.423088	-0.179029	M3 brown Postsynapse/Glycosylation|0.7405
PLCB1|Q9NQ66	brown	-0.413454	0.629499	0.739852	-0.251354	-0.219948	-0.13385	0.477985	-0.388753	-0.160481	-0.472196	0.236777	-0.422536	0.427185	0.200196	0.49078	0.274569	-0.0428806	-0.222175	0.4422	-0.39813	-0.0721903	0.168996	0.0996597	-0.298686	0.0975186	0.101396	-0.157891	0.481568	-0.488914	0.289711	-0.0327727	M3 brown Postsynapse/Glycosylation|0.7399
GGA3|Q9NZ52	brown	-0.109324	0.66228	0.737231	-0.421757	-0.00856187	0.0722511	0.703277	-0.555868	-0.172698	-0.700471	0.219726	-0.822895	-0.0816306	0.424657	-0.00976312	0.206694	-0.262265	-0.339266	0.233137	0.0112282	-0.63397	0.183119	-0.0140583	-0.0669182	0.171625	0.239367	-0.0461875	0.488017	-0.512024	0.277605	-0.187891	M3 brown Postsynapse/Glycosylation|0.7372
CSMD2|Q7Z408	brown	-0.555825	0.521667	0.736991	-0.191971	-0.312487	-0.248066	0.502687	-0.577635	-0.00510467	-0.618119	0.122143	-0.364771	0.529062	0.460345	0.430618	0.344144	0.0804499	-0.344623	0.502374	-0.404234	0.0159373	-0.0238	0.166708	-0.450804	0.0873965	0.225089	-0.265242	0.409456	-0.409557	0.168857	-0.217932	M3 brown Postsynapse/Glycosylation|0.737
MET|P08581	brown	-0.372351	0.63591	0.736684	-0.205461	-0.173803	-0.125408	0.392397	-0.433767	-0.0870262	-0.552449	0.144421	-0.445324	0.427488	0.26027	0.376406	0.322007	0.0912693	-0.177835	0.533566	-0.322018	-0.102837	0.162202	0.170208	-0.472152	0.00146387	0.0833932	-0.272012	0.56385	-0.520359	0.117449	-0.0664373	M3 brown Postsynapse/Glycosylation|0.7367
HAPLN4|Q86UW8	brown	0.0598253	0.6949	0.736585	-0.523313	0.0825687	0.256123	0.406403	-0.296877	-0.296022	-0.285604	0.397022	-0.475922	-0.0795232	0.410928	0.117764	0.0842061	-0.359965	-0.301853	0.0897211	0.0577729	-0.455631	0.192872	-0.162231	0.0353049	0.0179256	0.0990575	-0.276084	0.567788	-0.469729	0.276291	0.0355853	M3 brown Postsynapse/Glycosylation|0.7366
IMPAD1|Q9NX62	brown	-0.0821726	0.667029	0.735658	-0.315128	0.062707	0.195514	0.482274	-0.433853	-0.289188	-0.385515	0.49395	-0.551058	0.0273445	0.284078	0.282489	0.0888241	-0.420903	-0.277431	0.0769477	0.00827074	-0.478152	0.288776	-0.0138374	-0.0478462	0.0172563	0.013514	-0.257044	0.460208	-0.588582	0.35677	-0.0827505	M3 brown Postsynapse/Glycosylation|0.7357
NT5DC3|Q86UY8	brown	-0.466114	0.427559	0.734206	-0.200501	-0.395751	-0.293537	0.651579	-0.535628	0.00293583	-0.523341	0.109972	-0.485847	0.331264	0.371068	0.246738	0.241082	-0.159161	-0.396335	0.397052	-0.282702	-0.171164	0.0298643	-0.0799507	-0.186761	0.232247	0.189404	-0.106381	0.57902	-0.459685	0.193796	0.100647	M3 brown Postsynapse/Glycosylation|0.7342
C14orf93|Q9H972	brown	-0.264133	0.673084	0.73362	-0.430492	-0.136141	-0.067004	0.413595	-0.51354	-0.0269446	-0.424149	0.235544	-0.447306	0.233104	0.221896	0.228028	0.278571	-0.199262	-0.186896	0.392842	-0.0680867	-0.212334	0.332293	0.0857555	-0.199697	-0.015852	0.0964271	-0.249437	0.48152	-0.636422	0.65804	-0.0944423	M3 brown Postsynapse/Glycosylation|0.7336
C21orf33|P0DPI2	brown	-0.42226	0.557186	0.732757	-0.317301	-0.120525	-0.0761021	0.501147	-0.621767	-0.12383	-0.360465	0.454536	-0.371227	0.332714	0.340846	0.449905	0.201757	-0.300204	-0.325522	0.204071	-0.150014	-0.19348	0.123091	0.108987	-0.178108	0.0213019	0.10908	-0.366395	0.368707	-0.564634	0.477061	-0.118053	M3 brown Postsynapse/Glycosylation|0.7328
CISD1|Q9NZ45	brown	-0.0647795	0.66452	0.731566	-0.494669	0.120477	0.344634	0.410596	-0.296669	-0.474613	-0.314993	0.577775	-0.470684	0.102539	0.356632	0.417943	0.128225	-0.302339	-0.23393	0.0862969	-0.19417	-0.421315	0.166512	0.0528533	-0.0696648	0.030182	0.0741899	-0.260141	0.387122	-0.41269	0.349339	-0.0800917	M3 brown Postsynapse/Glycosylation|0.7316
CPA2|P48052	brown	-0.522204	0.438184	0.729283	-0.230009	-0.324231	-0.208555	0.556454	-0.694637	-0.0106213	-0.35777	0.343228	-0.272044	0.403363	0.524154	0.428327	0.215134	-0.295109	-0.432096	0.201879	-0.244097	-0.0669652	-0.0183939	0.0117614	-0.191815	0.0909359	0.22382	-0.350507	0.290369	-0.451308	0.403945	-0.196535	M3 brown Postsynapse/Glycosylation|0.7293
GCNT2|Q8N0V5	brown	-0.384289	0.359634	0.720824	-0.12962	-0.33377	-0.346225	0.657967	-0.561363	0.172458	-0.587711	-0.0424601	-0.544506	0.214767	0.540943	0.0153124	0.130349	-0.0984086	-0.447078	0.348629	-0.0765783	-0.209682	0.00468295	-0.0471825	-0.213083	0.186745	0.199723	-0.129357	0.585933	-0.431558	0.127512	0.054549	M3 brown Postsynapse/Glycosylation|0.7208
TFPI2|P48307	brown	-0.194073	0.457949	0.719078	-0.22627	-0.00788018	0.247917	0.590202	-0.418537	-0.504209	-0.438637	0.643087	-0.448069	0.0928642	0.572546	0.446373	0.102088	-0.372787	-0.549928	-0.112172	-0.277349	-0.418104	-0.154553	-0.0969918	0.0183669	0.162967	0.188758	-0.257175	0.442005	-0.281355	0.192911	0.0633794	M3 brown Postsynapse/Glycosylation|0.7191
B3GNT2|Q9NY97	brown	-0.157416	0.606267	0.717011	-0.221754	-0.0957942	-0.0111686	0.520022	-0.412288	-0.0801641	-0.535168	0.168089	-0.656903	0.0812843	0.267842	0.0604697	0.133025	-0.15214	-0.238472	0.361949	0.00558549	-0.418786	0.216016	-0.0500442	-0.18533	-0.00126403	-0.0326077	-0.18196	0.558094	-0.504134	0.228382	-0.0637712	M3 brown Postsynapse/Glycosylation|0.717
RBM24|Q9BX46	brown	-0.246754	0.535873	0.716857	-0.31237	0.104578	0.168066	0.48597	-0.558189	-0.338871	-0.391749	0.615583	-0.419849	0.153471	0.497259	0.387133	0.0963365	-0.30443	-0.409863	-0.00484654	-0.0777463	-0.367775	-0.0308691	0.135106	-0.13207	-0.00562774	0.106851	-0.407611	0.317498	-0.384921	0.300845	-0.172856	M3 brown Postsynapse/Glycosylation|0.7169
RPS6KA5|O75582	brown	0.0396403	0.630803	0.714954	-0.384259	-0.0312441	0.173883	0.558882	-0.352812	-0.258104	-0.289479	0.417488	-0.498551	-0.167627	0.349099	0.00953697	-0.00655179	-0.517986	-0.424326	0.0197637	0.115841	-0.51134	0.21661	-0.304399	0.243952	0.168439	0.142589	-0.130695	0.395028	-0.4457	0.333728	-0.120063	M3 brown Postsynapse/Glycosylation|0.715
ST8SIA2|Q92186	brown	-0.181988	0.584834	0.713709	-0.33323	-0.189791	0.0377834	0.365749	-0.354986	-0.177717	-0.275592	0.332698	-0.289659	0.268257	0.243236	0.405179	0.407493	-0.314515	-0.190098	0.261783	-0.212449	-0.133112	0.264654	-0.0441427	-0.194965	-0.0778785	0.0182934	-0.329102	0.557698	-0.536624	0.344578	0.132602	M3 brown Postsynapse/Glycosylation|0.7137
C1QL2|Q7Z5L3	brown	-0.439341	0.476703	0.71058	-0.109872	-0.151158	0.018564	0.465534	-0.401757	-0.343	-0.46949	0.450253	-0.341409	0.475683	0.367499	0.651177	0.175187	-0.0464285	-0.341662	0.254029	-0.515548	-0.0976847	-0.0710221	0.107976	-0.365301	0.05873	0.0259038	-0.289092	0.484998	-0.337591	0.138668	0.0592975	M3 brown Postsynapse/Glycosylation|0.7106
AHSA1|O95433	brown	-0.239196	0.630565	0.710547	-0.394566	-0.102482	-0.035191	0.684719	-0.502173	-0.128818	-0.654706	0.20932	-0.722734	0.107121	0.323254	0.1511	0.272397	-0.236005	-0.245293	0.332126	-0.114864	-0.450704	0.209769	0.0618707	-0.104469	0.156647	0.223102	0.0105314	0.355968	-0.483201	0.333204	-0.260642	M3 brown Postsynapse/Glycosylation|0.7105
HHIP|Q96QV1	brown	-0.241606	0.555322	0.708053	-0.248723	-0.207136	-0.118115	0.456204	-0.516861	0.00689158	-0.464764	0.115174	-0.41408	0.154027	0.395468	0.0826463	0.264664	-0.123186	-0.312419	0.332101	-0.0470393	-0.208733	0.127823	-0.100094	-0.244011	-0.00345706	0.155207	-0.300732	0.51035	-0.523831	0.19319	-0.0671737	M3 brown Postsynapse/Glycosylation|0.7081
IL20RB|Q6UXL0	brown	-0.0686518	0.569632	0.707544	-0.268088	-0.128468	0.0618611	0.381079	-0.286293	-0.145284	-0.227575	0.302222	-0.35037	0.109594	0.341739	0.211079	0.164769	-0.290013	-0.253175	0.186694	-0.0392229	-0.233132	0.260459	-0.146531	-0.0769176	-0.0728815	0.00283701	-0.354068	0.445446	-0.431049	0.317817	0.00185557	M3 brown Postsynapse/Glycosylation|0.7075
VSNL1|P62760	brown	8.01e-05	0.566649	0.707253	-0.481701	-0.0302883	0.175192	0.438054	-0.347613	-0.275041	-0.188029	0.449839	-0.339571	-0.0285192	0.408307	0.214755	0.211356	-0.490576	-0.370149	-0.00410147	0.0325852	-0.344396	0.151626	-0.203451	0.16432	0.088481	0.172758	-0.272122	0.525276	-0.525112	0.430951	0.122405	M3 brown Postsynapse/Glycosylation|0.7073
CNOT1|A5YKK6	brown	0.134644	0.679773	0.704947	-0.547318	0.201814	0.40009	0.525532	-0.288635	-0.484753	-0.431414	0.575631	-0.650703	-0.187344	0.262254	0.170656	0.145916	-0.425785	-0.271881	-0.00665481	0.055233	-0.648793	0.213029	-0.0968456	0.122274	0.093808	0.0828001	-0.118963	0.543647	-0.500537	0.353693	0.106745	M3 brown Postsynapse/Glycosylation|0.7049
SNCA|P37840	brown	-0.486284	0.479882	0.704022	-0.253658	-0.440284	-0.230303	0.567184	-0.493985	-0.0965257	-0.506233	0.153247	-0.397232	0.424879	0.468713	0.359889	0.21956	-0.063384	-0.436945	0.358008	-0.477553	-0.0944442	0.010231	-0.083419	-0.152532	0.301755	0.387996	-0.0476233	0.360944	-0.405933	0.115825	-0.208046	M3 brown Postsynapse/Glycosylation|0.704
IGSF11|Q5DX21	brown	-0.211907	0.606042	0.700181	-0.313429	-0.0293007	-0.108095	0.35387	-0.320326	-0.0349662	-0.366375	0.149731	-0.381317	0.27872	0.231742	0.253804	0.265646	0.0193555	-0.0697493	0.448301	-0.0799477	-0.116005	0.234966	0.167839	-0.345116	-0.108903	0.00901156	-0.321719	0.476169	-0.455085	0.281706	-0.00965865	M3 brown Postsynapse/Glycosylation|0.7002
APOA2|P02652	brown	-0.263914	0.378497	0.699745	-0.183944	-0.133698	-0.142261	0.522408	-0.473715	-0.0115045	-0.494169	0.125589	-0.477535	0.1408	0.605612	0.0269846	0.120055	-0.0721139	-0.429852	0.221605	-0.055929	-0.277341	-0.0633747	-0.00178556	-0.23904	0.153531	0.238973	-0.207108	0.414172	-0.338107	0.131448	-0.0742924	M3 brown Postsynapse/Glycosylation|0.6997
NUDCD3|Q8IVD9	brown	-0.224542	0.577044	0.696068	-0.258324	-0.263962	-0.218283	0.609371	-0.408507	0.0832882	-0.503485	-0.0242877	-0.629824	0.117587	0.235343	-0.0156698	0.196768	-0.199212	-0.198544	0.454935	-0.0202992	-0.340182	0.314947	-0.0920421	-0.133135	0.102613	0.0929734	-0.0409062	0.42434	-0.51757	0.262136	-0.160279	M3 brown Postsynapse/Glycosylation|0.6961
NDUFV2|P19404	brown	0.066782	0.706678	0.695413	-0.518776	0.0867903	0.214825	0.423985	-0.464123	-0.229038	-0.401445	0.341712	-0.530114	-0.164291	0.353975	-0.022846	0.312857	-0.353721	-0.288357	0.0960789	0.170782	-0.537279	0.284478	-0.118646	0.0315877	0.00746813	0.183124	-0.26724	0.48411	-0.586761	0.347162	-0.124711	M3 brown Postsynapse/Glycosylation|0.6954
QPCTL|Q9NXS2	brown	-0.204624	0.499526	0.691587	-0.262981	-0.0678315	-0.0671329	0.48591	-0.380851	-0.0783499	-0.494533	0.119258	-0.561341	0.143287	0.408168	0.109124	0.045704	-0.0505025	-0.269166	0.332957	-0.0639164	-0.324884	0.0650345	-0.013029	-0.202815	0.0982391	0.132501	-0.160351	0.538795	-0.41959	0.109149	-0.00866979	M3 brown Postsynapse/Glycosylation|0.6916
RIPK2|O43353	brown	-0.382854	0.56997	0.690104	-0.19732	-0.256923	-0.145195	0.425682	-0.372851	-0.0859136	-0.476535	0.0560502	-0.376503	0.38595	0.350013	0.300534	0.217293	0.108583	-0.251911	0.464156	-0.371001	-0.0392026	0.0912888	0.0631852	-0.339957	0.10267	0.153766	-0.201635	0.440976	-0.353537	0.0860275	-0.144527	M3 brown Postsynapse/Glycosylation|0.6901
DNAJC18|Q9H819	brown	0.0155092	0.556467	0.689861	-0.43247	-0.138692	0.244383	0.392019	-0.279139	-0.319317	-0.195318	0.506959	-0.280222	0.019464	0.444517	0.278621	0.245746	-0.503733	-0.354204	0.0340683	-0.0623947	-0.300289	0.16451	-0.333152	0.147946	0.00839365	0.13628	-0.345203	0.331366	-0.374675	0.425817	-0.0646167	M3 brown Postsynapse/Glycosylation|0.6899
SHANK1|Q9Y566	brown	-0.315029	0.479717	0.687833	-0.271942	-0.247142	-0.260582	0.511092	-0.521413	0.115997	-0.391546	0.0665849	-0.389702	0.242555	0.357143	0.093684	0.300196	-0.174109	-0.27451	0.38088	0.0172598	-0.138625	0.210323	-0.0515609	-0.199781	0.0500947	0.1914	-0.200391	0.33521	-0.511482	0.282955	-0.203478	M3 brown Postsynapse/Glycosylation|0.6878
TMX2|Q9Y320	brown	-0.340928	0.386117	0.682123	-0.239016	-0.342647	-0.211632	0.467547	-0.60843	0.0881611	-0.297711	0.232023	-0.212104	0.186373	0.506343	0.0835109	0.269328	-0.323458	-0.526339	0.133395	0.0452659	-0.108891	-0.0152246	-0.27817	-0.0556689	0.061848	0.201069	-0.384757	0.476328	-0.466129	0.346896	0.0557877	M3 brown Postsynapse/Glycosylation|0.6821
CCDC101|Q96ES7	brown	-0.0211522	0.575753	0.681075	-0.372114	0.0420932	0.315482	0.39398	-0.277922	-0.456312	-0.223408	0.627076	-0.362217	0.0622667	0.218207	0.46598	0.195321	-0.426842	-0.20759	-0.000630819	-0.151035	-0.349164	0.201385	-0.0899815	-0.00220991	-0.0624966	-0.0694222	-0.3239	0.653652	-0.521063	0.332838	0.342325	M3 brown Postsynapse/Glycosylation|0.6811
C1orf186|Q6ZWK4	brown	-0.244867	0.423891	0.680519	-0.223575	-0.170622	-0.0020352	0.365831	-0.433461	-0.136168	-0.127653	0.381305	-0.143603	0.216732	0.497764	0.29366	0.126219	-0.284624	-0.404156	0.100512	-0.101198	-0.0948046	0.0230174	-0.132994	-0.0890499	-0.0379054	0.0485867	-0.45992	0.400369	-0.40637	0.251484	0.00663603	M3 brown Postsynapse/Glycosylation|0.6805
NRG1|Q02297	brown	-0.199057	0.539261	0.680411	-0.241344	-0.300409	0.0489806	0.335561	-0.211923	-0.195858	-0.2405	0.322296	-0.277634	0.309581	0.223767	0.425959	0.133768	-0.220728	-0.169953	0.279695	-0.361881	-0.0981544	0.224272	-0.163115	-0.179368	-0.00874603	0.0520422	-0.232055	0.404969	-0.412826	0.32073	0.00961307	M3 brown Postsynapse/Glycosylation|0.6804
AGAP2|Q99490	brown	-0.274031	0.627796	0.679476	-0.407805	-0.237921	-0.174542	0.39447	-0.250935	-0.0196534	-0.286151	0.0928038	-0.409175	0.321328	0.125098	0.284236	0.19328	-0.112084	-0.0825112	0.481128	-0.224786	-0.117057	0.371509	0.00535439	-0.203886	0.0695499	0.0867036	-0.0728355	0.47017	-0.566739	0.214398	0.0189287	M3 brown Postsynapse/Glycosylation|0.6795
KIAA1549L|Q6ZVL6	brown	-0.121137	0.37936	0.678041	-0.304526	-0.0279384	0.0841132	0.601907	-0.400126	-0.235235	-0.492084	0.324321	-0.592107	-0.0459088	0.536659	0.0685485	-0.0256574	-0.289893	-0.519964	0.0295602	-0.0513019	-0.49002	-0.0965838	-0.154941	0.00533522	0.233512	0.181565	-0.118167	0.685164	-0.387903	0.106233	0.304062	M3 brown Postsynapse/Glycosylation|0.678
HABP4|Q5JVS0	brown	0.0691203	0.674663	0.677525	-0.361764	0.0373495	0.217278	0.372691	-0.298079	-0.213329	-0.285429	0.267472	-0.473558	-0.0926784	0.360144	0.0842348	0.0766629	-0.315327	-0.172238	0.126891	0.0658943	-0.430041	0.346405	-0.0720551	-0.0393869	-0.0861067	0.0320161	-0.333197	0.421868	-0.449807	0.282469	-0.113457	M3 brown Postsynapse/Glycosylation|0.6775
METAP2|P50579	brown	-0.234181	0.502404	0.67593	-0.191234	-0.100145	-0.0686518	0.664101	-0.452506	-0.0623296	-0.525654	0.173548	-0.727532	0.0534835	0.313487	0.0677169	0.018274	-0.228706	-0.267006	0.278107	-0.0468143	-0.469961	0.134092	0.00554602	-0.132411	0.156653	0.00141203	-0.0600903	0.43688	-0.385669	0.270789	-0.0977474	M3 brown Postsynapse/Glycosylation|0.6759
ADCYAP1|P18509	brown	-0.57568	0.442653	0.675429	-0.216458	-0.311535	-0.219325	0.412633	-0.516893	-0.119964	-0.407195	0.314058	-0.217112	0.631303	0.360825	0.625697	0.566706	-0.0284382	-0.301796	0.393436	-0.456567	0.0655353	-0.0205293	0.137583	-0.371802	0.0613426	0.191686	-0.27836	0.353347	-0.415246	0.193876	-0.128361	M3 brown Postsynapse/Glycosylation|0.6754
C1GALT1C1|Q96EU7	brown	-0.257848	0.537267	0.674507	-0.348052	-0.157653	-0.115142	0.489228	-0.530559	-0.00634862	-0.531607	0.106548	-0.509634	0.148018	0.316853	0.0601099	0.314975	-0.121035	-0.255481	0.340907	-0.0361162	-0.293598	0.155661	-0.00284313	-0.212971	0.0347683	0.24439	-0.203812	0.534452	-0.568373	0.20988	-0.0491	M3 brown Postsynapse/Glycosylation|0.6745
B4GALNT1|Q00973	brown	-0.0236661	0.603718	0.673788	-0.441607	-0.117349	-0.0432106	0.409689	-0.364981	0.0300946	-0.293596	0.0486589	-0.464325	-0.0358223	0.415177	-0.105537	0.184864	-0.236422	-0.224974	0.261936	0.142921	-0.340871	0.302822	-0.156549	-0.00682898	-0.00338685	0.172421	-0.250325	0.505425	-0.503884	0.200246	-0.0740045	M3 brown Postsynapse/Glycosylation|0.6738
CHST12|Q9NRB3	brown	-0.475995	0.373501	0.667608	-0.0857429	-0.384031	-0.290794	0.510038	-0.714626	0.11991	-0.565657	0.0268682	-0.296031	0.340289	0.592424	0.113071	0.271861	0.0237149	-0.48123	0.355505	-0.152625	-0.00864021	-0.0834781	-0.0381622	-0.369274	0.0581215	0.321031	-0.366289	0.387588	-0.389718	0.180778	-0.218086	M3 brown Postsynapse/Glycosylation|0.6676
APLP1|P51693	brown	-0.104617	0.641685	0.667024	-0.338494	-0.0196751	0.107561	0.371569	-0.439367	-0.178547	-0.372496	0.338005	-0.427375	0.0448462	0.263766	0.245197	0.247181	-0.291016	-0.239576	0.133684	-0.0386407	-0.343284	0.224266	0.00764124	-0.11017	-0.0164175	0.0475042	-0.296896	0.488886	-0.625688	0.334305	-0.0462818	M3 brown Postsynapse/Glycosylation|0.667
MANSC4|A6NHS7	brown	-0.348365	0.459529	0.664991	-0.128687	-0.266603	-0.167264	0.398219	-0.403104	-0.0068404	-0.398989	0.142552	-0.327397	0.356022	0.29651	0.296332	0.247567	-0.0717892	-0.217042	0.389798	-0.225894	-0.0655048	0.118786	-0.0494836	-0.348513	-0.0777301	0.0144359	-0.354964	0.439117	-0.425945	0.14937	-0.036777	M3 brown Postsynapse/Glycosylation|0.665
RAB6B|Q9NRW1	brown	-0.00617622	0.60775	0.663949	-0.406549	0.0345022	0.0936387	0.557307	-0.312558	-0.200288	-0.496493	0.217623	-0.748187	-0.152022	0.271878	-0.087643	0.00989913	-0.238019	-0.284741	0.17591	0.0609106	-0.620304	0.215926	-0.0720811	0.00792728	0.252234	0.116893	0.08053	0.491342	-0.468427	0.216671	-0.0527287	M3 brown Postsynapse/Glycosylation|0.6639
AMIGO2|Q86SJ2	brown	-0.0469986	0.587007	0.663465	-0.208101	-0.0553907	0.0651356	0.474614	-0.157955	-0.265698	-0.493426	0.170209	-0.578599	0.0593195	0.125327	0.109142	0.0935237	-0.0668985	-0.147802	0.333282	-0.166864	-0.349604	0.218157	-0.0849836	-0.155305	0.0207752	-0.0409275	-0.0474057	0.627084	-0.371571	0.136714	0.20406	M3 brown Postsynapse/Glycosylation|0.6635
FAM171B|Q6P995	brown	-0.029131	0.432176	0.662964	-0.265251	0.0502022	0.137833	0.615576	-0.348304	-0.225928	-0.476789	0.343456	-0.671579	-0.13159	0.458107	0.0384968	-0.0333226	-0.326298	-0.403064	0.0185325	0.0507268	-0.570926	-0.0119889	-0.123439	0.0295061	0.142691	0.0433421	-0.152974	0.6606	-0.347065	0.164143	0.253683	M3 brown Postsynapse/Glycosylation|0.663
HERC1|Q15751	brown	-0.105577	0.523011	0.660639	-0.24339	-0.0664623	0.0970506	0.455522	-0.212422	-0.221026	-0.26931	0.299231	-0.401665	0.0760828	0.290253	0.229668	-0.237875	-0.244593	-0.249112	0.138842	-0.15848	-0.255431	0.139182	-0.0581588	-0.0016212	0.160613	0.037084	-0.0797578	0.386622	-0.356714	0.305505	0.00454734	M3 brown Postsynapse/Glycosylation|0.6606
ATF6B|Q99941	brown	-0.339282	0.446471	0.638967	-0.160889	-0.210279	-0.154817	0.348909	-0.452337	0.000435175	-0.353221	0.237681	-0.184314	0.350977	0.331688	0.318937	0.214464	-0.0991524	-0.296651	0.30725	-0.0861545	0.0207995	0.0590547	0.0173284	-0.268788	-0.114802	0.0494898	-0.406079	0.371818	-0.437377	0.256753	-0.0354828	M3 brown Postsynapse/Glycosylation|0.639
QSOX2|Q6ZRP7	brown	-0.413424	0.390231	0.635804	-0.0705268	-0.308812	-0.325323	0.49712	-0.530076	0.195847	-0.484442	-0.00433069	-0.439384	0.306458	0.349677	0.124192	0.216942	-0.056193	-0.279602	0.421916	-0.0874223	-0.109656	0.145319	0.0956342	-0.301862	0.0317826	0.030462	-0.20594	0.445973	-0.44675	0.300203	-0.0790109	M3 brown Postsynapse/Glycosylation|0.6358
DYNLL2|Q96FJ2	brown	-0.289609	0.618992	0.634927	-0.286935	-0.178981	-0.227495	0.497633	-0.545703	0.104132	-0.579488	-0.0153435	-0.532011	0.177081	0.248145	-0.0031428	0.365367	-0.0252464	-0.196275	0.495932	0.0251983	-0.258638	0.283717	0.126026	-0.233783	0.0263653	0.217235	-0.100562	0.267695	-0.520042	0.238182	-0.432558	M3 brown Postsynapse/Glycosylation|0.6349
FAM20B|O75063	brown	-0.287507	0.385109	0.634051	-0.0915675	-0.141498	-0.0892432	0.477428	-0.458366	-0.0848293	-0.509106	0.208732	-0.449291	0.217194	0.303772	0.152429	0.174607	-0.0677339	-0.314554	0.296743	-0.102479	-0.218603	0.05792	0.0298963	-0.274959	0.0163554	0.0318933	-0.20799	0.456577	-0.381504	0.254555	0.0117067	M3 brown Postsynapse/Glycosylation|0.6341
DKK3|Q9UBP4	brown	-0.509154	0.382699	0.633921	-0.0859831	-0.178002	-0.176247	0.532038	-0.65693	-0.0946609	-0.610634	0.218776	-0.406476	0.426369	0.413921	0.349859	0.311173	-0.0231635	-0.371912	0.364314	-0.312796	-0.136467	-0.135004	0.172972	-0.396326	0.0923722	0.212483	-0.227917	0.352958	-0.404223	0.114475	-0.219401	M3 brown Postsynapse/Glycosylation|0.6339
NXT1|Q9UKK6	brown	-0.557732	0.349026	0.630476	-0.117883	-0.406236	-0.317169	0.604127	-0.518603	0.0160295	-0.526496	0.0829272	-0.40421	0.464032	0.334969	0.322795	0.216059	-0.0482542	-0.338856	0.438421	-0.403682	-0.0568868	-0.0596191	-0.0224469	-0.274209	0.281834	0.254859	-0.0422214	0.252727	-0.314911	0.181942	-0.1955	M3 brown Postsynapse/Glycosylation|0.6305
SPG20|Q8N0X7	brown	-0.23725	0.52008	0.630113	-0.352248	-0.135389	-0.0725596	0.595852	-0.470327	-0.0803733	-0.343198	0.300978	-0.44491	0.138524	0.270535	0.241203	0.267486	-0.386864	-0.269156	0.178778	-0.0500328	-0.325048	0.217904	-0.0516114	-0.027652	0.186541	0.210814	-0.0417367	0.270926	-0.488476	0.287813	-0.154145	M3 brown Postsynapse/Glycosylation|0.6301
SCG3|Q8WXD2	brown	-0.245913	0.514646	0.628365	-0.21415	-0.112486	0.00247951	0.317128	-0.451654	-0.122003	-0.282658	0.301816	-0.261753	0.242462	0.270007	0.276107	0.233914	-0.197342	-0.255253	0.214049	-0.0612576	-0.155432	0.16007	-0.0369094	-0.202082	-0.0323472	-0.0170311	-0.351682	0.359279	-0.448825	0.363943	-0.091563	M3 brown Postsynapse/Glycosylation|0.6284
ANGPT2|O15123	brown	-0.246816	0.552897	0.627366	-0.207567	-0.261389	-0.0951677	0.345087	-0.349616	-0.05774	-0.369873	0.12556	-0.293305	0.303486	0.255302	0.199334	0.244722	-0.0664874	-0.130575	0.416198	-0.178091	-0.0600102	0.218443	-0.0698507	-0.293062	-0.0656731	0.0899662	-0.245225	0.237951	-0.374855	0.199747	-0.281621	M3 brown Postsynapse/Glycosylation|0.6274
NOVA1|P51513	brown	-0.482877	0.34565	0.622113	-0.11115	-0.406188	-0.330336	0.561003	-0.559752	0.114698	-0.449194	0.0794543	-0.336658	0.342785	0.408837	0.18393	0.206392	-0.149812	-0.448686	0.307875	-0.198556	-0.0669533	-0.00758126	-0.0951102	-0.169566	0.225424	0.325368	-0.113985	0.345674	-0.3994	0.127468	-0.134277	M3 brown Postsynapse/Glycosylation|0.6221
BGLAP|P02818	brown	-0.39986	0.400147	0.620199	-0.249198	-0.19462	-0.223328	0.393976	-0.40292	0.0327238	-0.544569	0.0627306	-0.334057	0.394838	0.430428	0.249126	0.346618	0.168494	-0.33425	0.432821	-0.243113	-0.00733268	-0.0651065	0.141283	-0.355168	0.0824085	0.223405	-0.24626	0.429047	-0.325288	0.0905455	-0.0404345	M3 brown Postsynapse/Glycosylation|0.6202
RELT|Q969Z4	brown	0.0576478	0.635353	0.617062	-0.375767	-0.00786899	0.146288	0.258416	-0.349875	-0.127876	-0.183057	0.250978	-0.302678	-0.0549204	0.334208	0.0204693	0.160719	-0.3056	-0.189512	0.147104	0.167789	-0.322057	0.354554	-0.159188	-0.0249081	-0.13276	0.0587431	-0.363686	0.256742	-0.485404	0.355658	-0.293352	M3 brown Postsynapse/Glycosylation|0.6171
RGMA|Q96B86	brown	-0.429286	0.541009	0.617117	-0.211543	-0.176561	-0.0955221	0.248684	-0.407861	-0.0614504	-0.362443	0.227238	-0.22345	0.531955	0.20818	0.54449	0.322754	0.0566777	-0.0976534	0.45499	-0.355605	0.0577622	0.14298	0.202513	-0.512592	-0.1089	0.0415785	-0.345089	0.411881	-0.474559	0.218886	-0.097827	M3 brown Postsynapse/Glycosylation|0.6171
DUT|P33316	brown	-0.0391974	0.457202	0.617029	-0.40946	-0.116238	-0.00879551	0.515642	-0.517496	-0.0223483	-0.338758	0.182533	-0.430153	-0.127095	0.45033	-0.101745	0.262235	-0.423094	-0.41908	0.0703925	0.193187	-0.416911	0.129431	-0.248041	0.135168	0.192343	0.312329	-0.134386	0.479991	-0.545203	0.345075	-0.0114105	M3 brown Postsynapse/Glycosylation|0.617
C1orf162|Q8NEQ5	brown	-0.307199	0.410659	0.615627	-0.1399	-0.371127	-0.0999104	0.403943	-0.420316	-0.0604327	-0.356762	0.188213	-0.331373	0.331162	0.346417	0.312706	0.30036	-0.209162	-0.232503	0.333084	-0.307235	-0.127315	0.126132	-0.161306	-0.173554	-0.00645027	0.0896784	-0.294959	0.400508	-0.368352	0.142697	-0.0195685	M3 brown Postsynapse/Glycosylation|0.6156
PCSK1N|Q9UHG2	brown	-0.0509351	0.477497	0.614767	-0.343605	-0.0734679	0.00662205	0.494588	-0.517108	-0.0445311	-0.33478	0.158833	-0.438988	-0.131105	0.569058	-0.169753	0.100899	-0.322427	-0.465417	0.0396422	0.200707	-0.422318	0.111314	-0.209305	0.0814333	0.132871	0.332624	-0.189105	0.238049	-0.392926	0.282277	-0.354558	M3 brown Postsynapse/Glycosylation|0.6148
INSRR|P14616	brown	-0.479989	0.379931	0.612789	-0.0217161	-0.419747	-0.339845	0.407783	-0.474173	0.144158	-0.311907	0.0394809	-0.20433	0.458374	0.272986	0.304715	0.239565	-0.0971451	-0.208425	0.454179	-0.218724	0.0754103	0.132482	-0.0604936	-0.362231	0.0070803	0.0261584	-0.267895	0.348377	-0.426911	0.15967	-0.103431	M3 brown Postsynapse/Glycosylation|0.6128
CST8|O60676	brown	-0.247921	0.464113	0.611729	-0.220219	-0.16495	-0.10167	0.329358	-0.284157	-0.0761757	-0.405631	0.115548	-0.328496	0.31118	0.247803	0.312876	0.209324	0.0315341	-0.113427	0.385627	-0.274402	-0.0463707	0.0769604	0.126576	-0.271726	0.0337182	0.143365	-0.156963	0.388784	-0.359833	0.15872	-0.0484338	M3 brown Postsynapse/Glycosylation|0.6117
ACVR1B|P36896	brown	-0.303617	0.583098	0.609196	-0.390672	-0.105694	0.0686625	0.369642	-0.438577	-0.203077	-0.490434	0.305775	-0.45311	0.331687	0.217965	0.470716	0.248864	-0.158476	-0.107209	0.364748	-0.350427	-0.225753	0.150114	0.154752	-0.333141	-0.0274628	0.101014	-0.234559	0.422802	-0.505579	0.184589	-0.101169	M3 brown Postsynapse/Glycosylation|0.6092
DPY30|Q9C005	brown	-0.0573289	0.516948	0.606298	-0.380037	-0.0141227	-0.080841	0.473841	-0.420478	0.0116849	-0.304755	0.158613	-0.482343	-0.0781853	0.346531	-0.0564889	0.254113	-0.315883	-0.319428	0.147423	0.214292	-0.396329	0.158721	-0.0779929	0.0701862	0.147599	0.193323	-0.168007	0.285196	-0.489041	0.356462	-0.212734	M3 brown Postsynapse/Glycosylation|0.6063
GGT2|P36268	brown	-0.360474	0.558421	0.604355	-0.228603	-0.157634	-0.115371	0.303812	-0.36986	-0.0429	-0.320807	0.179106	-0.25735	0.403044	0.160793	0.384333	0.204025	0.0225705	-0.100409	0.402159	-0.270257	0.0410984	0.275273	0.145817	-0.350048	-0.0253549	0.0434133	-0.22397	0.483349	-0.484455	0.038037	0.0392279	M3 brown Postsynapse/Glycosylation|0.6044
PDIA4|P13667	brown	-0.232818	0.572753	0.604067	-0.342142	-0.101965	0.16699	0.313368	-0.448263	-0.260324	-0.366053	0.426966	-0.357667	0.254654	0.246381	0.446797	0.278757	-0.267445	-0.157584	0.201824	-0.265418	-0.261054	0.200324	0.0220411	-0.285976	-0.125812	0.0197482	-0.380253	0.371081	-0.506664	0.227875	-0.0822838	M3 brown Postsynapse/Glycosylation|0.6041
FAM107A|O95990	brown	-0.498853	0.25725	0.60391	-0.0875896	-0.298819	-0.0831444	0.518622	-0.501502	-0.203695	-0.412064	0.349054	-0.224918	0.450793	0.608683	0.574306	0.146257	-0.180053	-0.459397	0.116518	-0.519688	-0.0305038	-0.232263	0.091805	-0.208814	0.18637	0.275864	-0.221252	0.169698	-0.162495	0.258233	-0.187508	M3 brown Postsynapse/Glycosylation|0.6039
ST8SIA3|O43173	brown	-0.312569	0.535632	0.603467	-0.194559	-0.304229	-0.24263	0.312817	-0.399406	0.179081	-0.386861	-0.0609948	-0.358464	0.367689	0.162576	0.199989	0.346428	-0.0647137	-0.091277	0.553621	-0.115275	-0.0474174	0.274196	0.0264239	-0.320735	-0.0773123	0.00252302	-0.242745	0.478851	-0.510348	0.296665	-0.09544	M3 brown Postsynapse/Glycosylation|0.6035
IL27RA|Q6UWB1	brown	-0.488227	0.399172	0.597414	-0.097498	-0.292574	-0.239859	0.277363	-0.379719	-0.0187439	-0.394481	0.123747	-0.176319	0.516079	0.159324	0.436222	0.199976	0.160055	-0.182533	0.423691	-0.416339	0.157093	0.00514807	0.121613	-0.468072	-0.00295052	0.0642129	-0.246647	0.475645	-0.418913	0.159538	0.105823	M3 brown Postsynapse/Glycosylation|0.5974
MGAT4B|Q9UQ53	brown	-0.0290774	0.384283	0.596278	-0.188755	-0.0302721	0.130747	0.539281	-0.214757	-0.248899	-0.35344	0.252154	-0.603495	-0.100199	0.379029	0.000954109	-0.178758	-0.228927	-0.345254	0.045561	-0.047904	-0.499867	0.0849376	-0.121606	0.0304868	0.25311	0.0324325	0.0437398	0.416298	-0.229848	0.17807	0.0418917	M3 brown Postsynapse/Glycosylation|0.5963
FRS2|Q8WU20	brown	-0.393132	0.532905	0.59317	-0.19454	-0.328332	-0.183735	0.227473	-0.427347	0.0746656	-0.223157	0.178768	-0.148526	0.518967	0.101361	0.467375	0.501788	-0.145033	-0.0026072	0.472101	-0.205504	0.0814576	0.319269	0.00814954	-0.3563	-0.228233	-0.00602269	-0.426379	0.360714	-0.524902	0.321429	-0.11541	M3 brown Postsynapse/Glycosylation|0.5932
SNRPF|P62306	brown	-0.447092	0.424908	0.580201	-0.114744	-0.388055	-0.343618	0.256582	-0.407171	0.169002	-0.248808	0.017336	-0.047997	0.505764	0.192244	0.291147	0.370288	0.0649394	-0.149844	0.505095	-0.201556	0.279578	0.195013	0.0133211	-0.372179	-0.108533	0.0613706	-0.354021	0.360225	-0.432106	0.110756	-0.0576192	M3 brown Postsynapse/Glycosylation|0.5802
ANK2|Q01484	brown	-0.1849	0.31645	0.578315	-0.179746	-0.143789	0.116605	0.376032	-0.28525	-0.288892	-0.216257	0.442251	-0.173838	0.176015	0.495408	0.37805	0.026461	-0.263545	-0.447091	-0.0204689	-0.244425	-0.130881	-0.107332	-0.147184	0.0226682	0.152136	0.0820545	-0.247738	0.300045	-0.208479	0.24729	0.0281197	M3 brown Postsynapse/Glycosylation|0.5783
BOLA3|Q53S33	brown	-0.340412	0.473496	0.57745	-0.29392	-0.198488	-0.213081	0.458747	-0.441606	0.0196181	-0.375688	0.124801	-0.36198	0.261772	0.153713	0.249045	0.328639	-0.140805	-0.151918	0.356508	-0.143281	-0.130128	0.210025	0.0530173	-0.17918	0.0943165	0.201581	-0.0908352	0.300753	-0.508732	0.279811	-0.101655	M3 brown Postsynapse/Glycosylation|0.5774
FGF19|O95750	brown	-0.26854	0.295422	0.573805	-0.0692995	-0.225941	-0.159534	0.499004	-0.553632	0.10064	-0.490837	0.0602941	-0.426507	0.0643992	0.528634	-0.0513081	0.132621	-0.141934	-0.459118	0.135732	0.001286	-0.273757	-0.103924	-0.1045	-0.17122	0.116556	0.214348	-0.238193	0.354608	-0.327879	0.159712	-0.149913	M3 brown Postsynapse/Glycosylation|0.5738
STAU1|O95793	brown	0.248652	0.54173	0.568173	-0.420989	0.182103	0.238476	0.37162	-0.163623	-0.211796	-0.220416	0.273458	-0.52068	-0.339915	0.378982	-0.161737	-0.0905836	-0.353334	-0.295098	-0.0572295	0.310062	-0.572792	0.199582	-0.16909	0.215877	0.138369	0.103755	-0.0608231	0.345039	-0.344501	0.341302	-0.103608	M3 brown Postsynapse/Glycosylation|0.5682
LRP2|P98164	brown	-0.171048	0.526969	0.565942	-0.256524	-0.114363	-0.130527	0.262621	-0.147541	0.0153192	-0.256828	-0.00411993	-0.371829	0.269325	0.160222	0.224978	0.197551	0.115282	0.0368859	0.464301	-0.167899	-0.0709374	0.251281	0.143974	-0.341275	-0.0232507	0.0249894	-0.169221	0.444337	-0.350666	0.133843	0.0272635	M3 brown Postsynapse/Glycosylation|0.5659
TLL1|O43897	brown	-0.346791	0.411617	0.565585	-0.161663	-0.289745	-0.318946	0.374153	-0.329496	0.0694582	-0.433701	-0.0889706	-0.316706	0.30649	0.383142	0.0378509	0.218751	0.235155	-0.317305	0.44833	-0.168125	0.00146777	0.0422736	-0.0240415	-0.283277	0.120607	0.172324	-0.119416	0.34506	-0.312076	0.029455	-0.120552	M3 brown Postsynapse/Glycosylation|0.5656
C1orf56|Q9BUN1	brown	-0.257218	0.448045	0.56283	-0.342599	-0.193268	-0.318017	0.347665	-0.319673	0.252698	-0.234557	-0.0364262	-0.293077	0.219003	0.243685	0.0724677	0.243639	-0.0610305	-0.159072	0.374471	0.0819681	-0.024848	0.270357	0.06403	-0.164451	0.00998587	0.110162	-0.198204	0.441596	-0.441925	0.510058	0.0683356	M3 brown Postsynapse/Glycosylation|0.5628
RPE|Q96AT9	brown	-0.558928	0.323781	0.55998	-0.0721991	-0.329492	-0.175658	0.561355	-0.380128	-0.195632	-0.519215	0.22445	-0.409239	0.524971	0.198256	0.558282	0.0940088	0.00462299	-0.220964	0.370852	-0.641776	-0.0700188	-0.0378002	0.102188	-0.340465	0.238521	0.124893	0.0877591	0.337991	-0.274931	0.00701812	-0.00561804	M3 brown Postsynapse/Glycosylation|0.56
VEGFC|P49767	brown	-0.151349	0.368949	0.557444	-0.275695	-0.115519	0.0285152	0.361552	-0.42464	-0.1743	-0.179508	0.34511	-0.195671	0.079679	0.458072	0.163236	0.195704	-0.340493	-0.380474	0.00410152	-0.0743984	-0.201337	0.00352293	-0.140079	0.0501405	0.0365531	0.12037	-0.338532	0.248883	-0.254192	0.329348	-0.0746307	M3 brown Postsynapse/Glycosylation|0.5574
ARHGAP5|Q13017	brown	-0.174723	0.466563	0.554134	-0.249516	-0.0683996	0.171541	0.39084	-0.237682	-0.29491	-0.306989	0.440293	-0.382095	0.235939	0.190165	0.492203	0.0710983	-0.257698	-0.139625	0.156074	-0.318226	-0.255973	0.119423	0.0439614	-0.122023	0.053024	0.0473441	-0.112116	0.227538	-0.343418	0.21385	-0.161987	M3 brown Postsynapse/Glycosylation|0.5541
POMGNT2|Q8NAT1	brown	-0.215681	0.329686	0.545865	-0.127896	-0.20337	-0.121461	0.43754	-0.227392	-0.128041	-0.47818	0.120614	-0.391868	0.188462	0.227556	0.122069	0.106638	-0.0254623	-0.313328	0.272181	-0.225918	-0.137647	0.0247971	-0.146186	-0.0943882	0.197944	0.137922	0.0229385	0.470127	-0.243828	0.112031	0.198087	M3 brown Postsynapse/Glycosylation|0.5459
SMAD4|Q13485	brown	-0.602155	0.329366	0.545825	-0.00503342	-0.39489	-0.396759	0.576499	-0.588317	0.152573	-0.600875	-0.0334859	-0.474828	0.465144	0.302981	0.263628	0.244786	-0.00504552	-0.265719	0.480549	-0.315951	-0.0961601	0.00385467	0.130578	-0.42262	0.157281	0.178246	-0.0374429	0.313714	-0.397006	0.0308973	-0.222769	M3 brown Postsynapse/Glycosylation|0.5458
EMC4|Q5J8M3	brown	-0.364868	0.324023	0.544747	-0.207759	-0.330018	-0.483522	0.389408	-0.48605	0.410318	-0.452801	-0.312626	-0.345627	0.250567	0.491117	-0.142288	0.289453	0.115101	-0.320486	0.469008	0.0493159	-0.0178467	0.0678235	0.0381601	-0.23119	0.118687	0.340249	-0.145171	0.339683	-0.359113	0.0839585	-0.212811	M3 brown Postsynapse/Glycosylation|0.5447
ST14|Q9Y5Y6	brown	-0.121387	0.393873	0.543498	0.0188647	-0.202333	0.141332	0.349817	-0.21932	-0.263193	-0.188459	0.365981	-0.25161	0.14915	0.14724	0.356484	0.0130051	-0.335048	-0.145187	0.0938581	-0.270793	-0.170787	0.127224	-0.152484	-0.0236776	0.0379795	-0.0767377	-0.203336	0.233521	-0.27351	0.472179	-0.0500615	M3 brown Postsynapse/Glycosylation|0.5435
TMEM38B|Q9NVV0	brown	0.0116814	0.497721	0.540709	-0.29486	0.0873399	0.258747	0.177554	-0.083431	-0.304511	-0.030056	0.413856	-0.267348	0.105204	0.159165	0.401717	0.048328	-0.242891	-0.0138215	0.0832736	-0.146113	-0.24483	0.301499	0.0361846	-0.0981882	-0.11106	-0.146165	-0.32013	0.388547	-0.402697	0.236879	0.152203	M3 brown Postsynapse/Glycosylation|0.5407
SURF1|Q15526	brown	-0.439021	0.410882	0.539895	-0.175622	-0.282541	-0.241882	0.28704	-0.395611	0.0540198	-0.409395	0.0339764	-0.237621	0.473348	0.141458	0.354028	0.240678	0.111113	-0.100002	0.524581	-0.333671	0.124506	0.118297	0.174109	-0.382809	0.0267165	0.0811627	-0.152666	0.381106	-0.425784	0.441886	-0.0508479	M3 brown Postsynapse/Glycosylation|0.5399
NAPB|Q9H115	brown	-0.0230127	0.450107	0.535356	-0.430398	-0.026144	0.0142345	0.248155	-0.390882	-0.0171954	-0.0312082	0.297143	-0.106993	0.0381954	0.373969	0.0954481	0.374028	-0.41224	-0.254559	0.0670642	0.238528	-0.127701	0.185481	-0.110698	0.0645389	-0.113906	0.129118	-0.426301	0.270821	-0.463892	0.505891	-0.115985	M3 brown Postsynapse/Glycosylation|0.5354
MAN1A2|O60476	brown	-0.266738	0.465416	0.535327	-0.194778	-0.193322	-0.198725	0.232387	-0.40103	0.0653737	-0.411316	0.0736366	-0.264735	0.285323	0.150962	0.116027	0.381091	0.0280702	-0.210183	0.411732	-0.0390087	-0.0225744	0.19819	0.0457114	-0.276892	-0.0529763	0.0666477	-0.210701	0.318969	-0.429798	0.290574	-0.163351	M3 brown Postsynapse/Glycosylation|0.5353
RSPO4|Q2I0M5	brown	0.000919759	0.429086	0.534818	-0.141171	-0.148348	-0.0443633	0.281395	-0.216309	-0.0146941	-0.117148	0.0637577	-0.256823	-0.0355331	0.281468	-0.0763435	0.0511085	-0.222854	-0.185403	0.122355	0.0841441	-0.188296	0.21646	-0.217279	-0.0336403	-0.055571	0.0391361	-0.267663	0.330001	-0.289779	0.282133	-0.0154133	M3 brown Postsynapse/Glycosylation|0.5348
UST|Q9Y2C2	brown	-0.157296	0.421513	0.534733	-0.132692	-0.161061	-0.0942635	0.334104	-0.414798	0.068192	-0.329512	0.0529142	-0.325808	0.138285	0.254054	0.0490509	0.262674	-0.198842	-0.159718	0.294144	0.0391045	-0.150426	0.211168	-0.0260086	-0.196366	-0.0759737	0.0542861	-0.279407	0.416457	-0.425962	0.184362	-0.0434013	M3 brown Postsynapse/Glycosylation|0.5347
NFU1|Q9UMS0	brown	-0.313561	0.333177	0.533242	-0.29067	-0.116283	0.0256422	0.506376	-0.495463	-0.260118	-0.436095	0.406046	-0.346348	0.23934	0.329385	0.350485	0.319967	-0.248647	-0.323919	0.120327	-0.291501	-0.216721	-0.0829194	0.0260852	-0.0385669	0.159124	0.262702	-0.0706508	0.210269	-0.311242	0.193241	-0.135355	M3 brown Postsynapse/Glycosylation|0.5332
CST3|P01034	brown	-0.170279	0.431749	0.508896	-0.176761	-0.138851	0.0352911	0.364219	-0.30994	-0.146963	-0.360298	0.199093	-0.307447	0.183089	0.383909	0.212606	0.234609	-0.0927573	-0.237889	0.196326	-0.169708	-0.166702	0.105137	0.0173228	-0.112667	0.0301407	0.162065	-0.153063	0.0878339	-0.180785	0.119671	-0.353986	M3 brown Postsynapse/Glycosylation|0.5089
NMS|Q5H8A3	brown	-0.169616	0.414825	0.504439	-0.35672	-0.0199866	-0.0325317	0.232878	-0.240547	-0.0168327	-0.271935	0.0647424	-0.315121	0.239963	0.381169	0.215422	0.235757	0.00284268	-0.0906665	0.323743	-0.129648	-0.122164	0.143875	0.146356	-0.194105	-0.0390839	0.13314	-0.250923	0.240314	-0.268152	0.16213	-0.157016	M3 brown Postsynapse/Glycosylation|0.5044
RAB27A|P51159	brown	0.159617	0.408908	0.504391	-0.277993	0.160134	0.3236	0.435796	-0.130488	-0.42183	-0.262045	0.456487	-0.491663	-0.215651	0.29723	0.0879248	0.0970937	-0.389024	-0.282843	-0.131375	0.0853985	-0.547847	0.0856754	-0.17858	0.157057	0.105659	0.0509311	-0.0539049	0.4125	-0.189634	0.226295	0.18751	M3 brown Postsynapse/Glycosylation|0.5044
PCDHA4|Q9UN74	brown	-0.135421	0.355021	0.503439	-0.205326	0.0239766	0.0191933	0.271034	-0.200162	-0.127202	-0.254749	0.217409	-0.255269	0.178903	0.290187	0.209708	0.0499758	-0.0699519	-0.160261	0.189856	-0.0912228	-0.128719	0.013187	0.0858623	-0.105349	-0.00189577	-0.0351038	-0.211594	0.243116	-0.230954	0.180526	-0.0346137	M3 brown Postsynapse/Glycosylation|0.5034
CTSB|P07858	brown	-0.402093	0.287324	0.50146	-0.140759	-0.219445	-0.208095	0.373468	-0.498331	-0.00099681	-0.497928	0.0571304	-0.258043	0.357525	0.338001	0.212529	0.379703	0.116955	-0.279291	0.356643	-0.244866	0.0308983	-0.136924	0.0999725	-0.386405	0.112073	0.192871	-0.149293	0.400017	-0.30187	0.229234	0.00147849	M3 brown Postsynapse/Glycosylation|0.5015
LDHA|P00338	brown	-0.283012	0.353006	0.497422	-0.20271	-0.117712	0.0935987	0.370563	-0.390212	-0.238423	-0.329182	0.373144	-0.271992	0.257031	0.270214	0.425657	0.00631202	-0.169272	-0.208083	0.0965863	-0.32563	-0.174428	-0.0600411	0.051409	-0.186683	0.039836	0.121298	-0.20569	0.265915	-0.328338	0.0649484	-0.0943615	M3 brown Postsynapse/Glycosylation|0.4974
ERCC1|P07992	brown	-0.0540038	0.37367	0.496809	-0.317008	-0.0636129	0.164524	0.435002	-0.290072	-0.289218	-0.140606	0.509372	-0.244164	-0.0101661	0.377557	0.260106	0.238968	-0.464494	-0.3804	-0.093633	-0.0253686	-0.311538	0.0530171	-0.182302	0.258886	0.121807	0.1274	-0.184596	0.0955894	-0.258272	0.357398	-0.220645	M3 brown Postsynapse/Glycosylation|0.4968
ULBP3|Q9BZM4	brown	-0.340734	0.29302	0.494017	-0.0174004	-0.173008	-0.16193	0.410682	-0.35445	-0.0118038	-0.350055	0.11854	-0.383595	0.298782	0.181978	0.279891	0.0725624	-0.11197	-0.158566	0.292877	-0.225789	-0.136607	0.0627445	0.114456	-0.247614	0.08793	0.016187	-0.140546	0.376097	-0.256761	0.153284	0.0441069	M3 brown Postsynapse/Glycosylation|0.494
FAAH2|Q6GMR7	brown	0.0707787	0.431206	0.492311	-0.395917	0.0110502	0.0787241	0.296294	-0.195589	-0.0345595	-0.180494	0.0915459	-0.370492	-0.121789	0.240176	-0.050268	0.092243	-0.264904	-0.0807694	0.122263	0.116119	-0.307496	0.222166	-0.0639721	0.00832535	-0.051974	-0.0153065	-0.180012	0.561259	-0.36973	0.240867	0.26148	M3 brown Postsynapse/Glycosylation|0.4923
DEFB132|Q7Z7B7	brown	-0.318496	0.359591	0.478491	-0.173417	-0.234783	-0.0241731	0.225713	-0.47333	-0.0674966	-0.0817369	0.433745	-0.0140088	0.299046	0.21597	0.416275	0.197374	-0.338694	-0.252496	0.0442294	-0.111372	-0.00235285	0.0597597	-0.140146	-0.0565496	-0.0664647	0.025648	-0.368134	0.205614	-0.432136	0.275482	-0.140052	M3 brown Postsynapse/Glycosylation|0.4785
CDON|Q4KMG0	brown	0.183854	0.477322	0.475955	-0.297989	0.0937976	0.1801	0.280919	-0.130213	-0.141408	-0.324123	0.11124	-0.457345	-0.214631	0.195434	-0.120434	0.0807865	-0.126104	-0.116441	0.0967451	0.177421	-0.402375	0.201691	-0.0794932	-0.0221687	0.00612247	7.46e-06	-0.0862648	0.540791	-0.326405	0.172831	0.200241	M3 brown Postsynapse/Glycosylation|0.476
EPHA3|P29320	brown	0.0669548	0.46442	0.468026	-0.281898	-0.0596234	0.18497	0.267143	0.0994986	-0.262842	-0.0101787	0.242586	-0.305908	0.00141647	-0.0245268	0.238598	-0.255686	-0.281717	-0.027921	0.120773	-0.157326	-0.241381	0.335226	-0.180826	0.0668297	0.139274	-0.120551	0.0667782	0.471996	-0.345188	0.202448	0.271895	M3 brown Postsynapse/Glycosylation|0.468
HSPA8|P11142	brown	-0.415895	0.334458	0.467902	-0.205795	-0.253677	-0.159891	0.378348	-0.480207	-0.0113454	-0.400179	0.171779	-0.201306	0.419518	0.206637	0.386658	0.326578	-0.0462548	-0.198337	0.350027	-0.321562	0.019302	-0.0248793	0.125819	-0.255627	0.107351	0.128046	-0.0785916	0.267018	-0.360725	0.144945	-0.165889	M3 brown Postsynapse/Glycosylation|0.4679
CILP2|Q8IUL8	brown	-0.290535	0.204912	0.466326	0.275269	-0.248187	-0.0611651	0.390776	-0.359051	-0.0619522	-0.309045	0.16064	-0.241645	0.217808	0.354876	0.241254	-0.00496176	-0.132098	-0.338628	0.103513	-0.235758	-0.13812	-0.108979	-0.129756	-0.248097	0.039749	0.0125254	-0.308276	0.234363	-0.183536	-0.0225012	-0.142571	M3 brown Postsynapse/Glycosylation|0.4663
GNRH2|O43555	brown	-0.270357	0.294439	0.462489	-0.241634	-0.253516	-0.21627	0.33937	-0.444945	0.19159	-0.343098	-0.0430666	-0.354254	0.193745	0.394844	0.0293038	0.399818	-0.0644945	-0.192776	0.284251	-0.0403838	-0.173555	0.077296	0.0331418	-0.157264	0.0454069	0.23806	-0.172758	0.254132	-0.327102	0.255032	-0.171235	M3 brown Postsynapse/Glycosylation|0.4625
RPLP2|P05387	brown	-0.297968	0.267825	0.460569	-0.295743	-0.314171	-0.10081	0.355244	-0.48647	-0.0312058	-0.14899	0.250004	-0.108881	0.228375	0.448162	0.237035	0.310942	-0.306379	-0.338535	0.0460384	-0.177801	-0.0651992	-0.0268654	-0.14245	0.0839775	0.148334	0.341722	-0.245793	0.131776	-0.309842	0.220419	-0.210094	M3 brown Postsynapse/Glycosylation|0.4606
FAM163B|P0C2L3	brown	-0.140949	0.369682	0.451367	-0.353195	-0.0960388	-0.182612	0.19979	-0.128658	0.150173	-0.286787	-0.165481	-0.300579	0.15507	0.307081	-0.0417142	0.126285	0.174905	-0.106684	0.417897	-0.0388383	-0.05334	0.126275	0.118129	-0.162341	0.0885906	0.181384	-0.0844557	0.274595	-0.231187	0.12826	-0.143601	M3 brown Postsynapse/Glycosylation|0.4514
IL11RA|Q14626	brown	0.123811	0.284673	0.451386	-0.110488	0.0924168	0.209362	0.32033	-0.110579	-0.25189	-0.207872	0.324252	-0.349397	-0.147379	0.303636	0.045156	-0.0820238	-0.250598	-0.22353	-0.0777312	0.0889131	-0.346815	0.039667	-0.117246	0.0382115	-0.0337518	-0.092423	-0.204332	0.410448	-0.168271	0.154716	0.272912	M3 brown Postsynapse/Glycosylation|0.4514
VSIG2|Q96IQ7	brown	0.0412904	0.33142	0.451258	-0.331446	-0.129605	0.258131	0.408563	-0.236917	-0.364567	-0.256415	0.481516	-0.223852	-0.139414	0.444894	0.116496	0.0696727	-0.380734	-0.487589	-0.198043	-0.05924	-0.341672	-0.0718246	-0.370158	0.344189	0.17003	0.258683	-0.0877972	0.146158	-0.168921	0.177746	-0.142114	M3 brown Postsynapse/Glycosylation|0.4513
FAS|P25445	brown	-0.269605	0.23233	0.449135	0.0400961	-0.159822	0.00473193	0.354043	-0.277559	-0.229147	-0.274589	0.277823	-0.154299	0.315865	0.345398	0.397561	0.133947	-0.0415993	-0.233412	0.152639	-0.306781	0.00432214	-0.0941796	0.0287363	-0.244085	-0.0220584	0.026625	-0.26286	0.0501064	-0.018073	0.146895	-0.204102	M3 brown Postsynapse/Glycosylation|0.4491
RBFOX2|O43251	brown	0.122689	0.408662	0.446979	-0.376844	-0.10622	0.210034	0.335826	-0.0296915	-0.300405	-0.109086	0.29765	-0.235412	-0.0956087	0.159378	0.172729	0.185646	-0.385495	-0.201491	-0.0146415	-0.104055	-0.25682	0.197876	-0.25598	0.285391	0.178749	0.266041	0.0271761	0.204622	-0.284548	0.250431	-0.0281482	M3 brown Postsynapse/Glycosylation|0.447
VDR|P11473	brown	-0.100134	0.358196	0.432855	-0.191527	-0.000352148	-0.119302	0.359596	-0.495609	0.179136	-0.187083	0.173172	-0.302643	-0.12201	0.296309	-0.147647	0.0480387	-0.373592	-0.307309	-0.0124807	0.408461	-0.291079	0.159414	-0.096245	0.0586192	-0.0267688	0.0811033	-0.285203	0.3087	-0.434855	0.230784	-0.0447994	M3 brown Postsynapse/Glycosylation|0.4329
LRIG3|Q6UXM1	brown	-0.0146488	0.295297	0.431304	-0.0273921	-0.0692571	-0.0986408	0.412461	-0.117734	0.0392255	-0.392202	-0.0550805	-0.543289	-0.0843164	0.14946	-0.149553	-0.055056	-0.0764653	-0.152782	0.215546	0.0811075	-0.341606	0.112262	-0.121211	-0.0576613	0.088707	-0.0893769	0.0609768	0.468876	-0.162896	0.116875	0.192221	M3 brown Postsynapse/Glycosylation|0.4313
NFE2L1|Q14494	brown	-0.369193	0.256296	0.428194	-0.0777699	-0.483842	-0.437936	0.270897	-0.398813	0.310138	-0.23859	-0.174155	-0.0831817	0.337256	0.327755	0.039048	0.336523	-0.0217199	-0.264588	0.382539	-0.104425	0.172305	0.108056	-0.146733	-0.178912	0.0286482	0.18409	-0.245466	0.166755	-0.309867	0.118773	-0.179661	M3 brown Postsynapse/Glycosylation|0.4282
TRH|P20396	brown	-0.0370285	0.371035	0.425499	-0.138795	-0.0480528	0.0262894	0.242979	-0.300908	0.017582	-0.169725	0.142489	-0.208492	-0.0263879	0.291455	0.0312497	0.157271	-0.232101	-0.22415	0.0586132	0.103577	-0.185819	0.14156	-0.0946281	0.0162974	-0.0796805	0.0763336	-0.33938	0.216746	-0.299394	0.270878	-0.134728	M3 brown Postsynapse/Glycosylation|0.4255
SYT9|Q86SS6	brown	0.0483856	0.250795	0.424382	-0.306585	-0.0909593	0.246834	0.291571	-0.0951368	-0.308793	-0.165731	0.333512	-0.256494	-0.0199412	0.298114	0.227327	0.101357	-0.295264	-0.170101	-0.0382103	-0.198397	-0.248401	-0.0234797	-0.174439	0.10133	0.0886326	0.0861648	-0.0968574	0.258751	-0.145466	0.198257	0.107548	M3 brown Postsynapse/Glycosylation|0.4244
LILRB2|Q8N423	brown	-0.516222	0.148737	0.41529	0.181146	-0.415109	-0.219636	0.371916	-0.50615	0.042715	-0.299438	0.189273	-0.0876821	0.443984	0.363718	0.405307	0.057981	-0.137354	-0.296607	0.165752	-0.342856	0.109064	-0.146165	-0.0650448	-0.256881	0.0134614	0.0880289	-0.28926	0.0821992	-0.163315	0.155726	-0.241462	M3 brown Postsynapse/Glycosylation|0.4153
FUT5|Q11128	brown	0.0112702	0.308778	0.414865	-0.288437	-0.049804	0.0111794	0.26452	-0.141753	-0.0243909	-0.202746	0.077746	-0.318065	0.0142468	0.13513	0.0386387	0.225143	-0.137688	-0.0536347	0.168689	0.0323949	-0.198348	0.183616	-0.0511983	-0.0744831	-0.0228204	0.0233316	-0.05905	0.436666	-0.285881	0.239935	0.241894	M3 brown Postsynapse/Glycosylation|0.4149
SF1|Q15637	brown	-0.321936	0.275385	0.414727	-0.256002	-0.383725	-0.206564	0.404937	-0.362118	0.0948433	-0.395145	-0.0804761	-0.326216	0.257969	0.221534	0.131312	0.266731	-0.0832891	-0.169677	0.366314	-0.266133	-0.077387	0.117019	-0.090998	-0.144239	0.11411	0.287696	-0.0149191	0.151172	-0.354337	0.228704	-0.192967	M3 brown Postsynapse/Glycosylation|0.4147
UQCRB|P14927	brown	-0.344032	0.257235	0.413833	-0.106967	-0.240388	-0.25459	0.253051	-0.524358	0.204677	-0.0973953	0.151594	-0.0478177	0.272533	0.313443	0.181888	0.187561	-0.264727	-0.266645	0.139481	0.07999	0.0236397	0.0692791	-0.0353975	-0.121859	-0.0648443	0.103282	-0.348975	0.14675	-0.410274	0.329031	-0.215434	M3 brown Postsynapse/Glycosylation|0.4138
TDGF1|P13385	brown	-0.0511818	0.182822	0.404846	-0.1594	-0.035668	0.0353554	0.333987	-0.297718	-0.0889308	-0.180171	0.214119	-0.246728	-0.0603245	0.371066	-0.0695431	-0.0323131	-0.278882	-0.29965	-0.0137738	0.0946729	-0.243337	-0.0155336	-0.117828	0.0617135	0.0848448	0.0544136	-0.138958	0.116548	-0.154438	0.175031	-0.145847	M3 brown Postsynapse/Glycosylation|0.4048
ATAD1|Q8NBU5	brown	-0.364259	0.27407	0.40211	-0.165057	0.00916398	-0.185908	0.302508	-0.459559	0.0410552	-0.41902	0.0427703	-0.276821	0.321462	0.293566	0.252495	0.224055	0.157431	-0.146895	0.32536	-0.177866	-0.0365118	0.00759165	0.452276	-0.393223	-0.00316951	0.14368	-0.162362	0.214451	-0.286809	0.00389373	-0.16329	M3 brown Postsynapse/Glycosylation|0.4021
SCGN|O76038	brown	-0.313188	0.200709	0.397267	-0.0878982	-0.280998	-0.30106	0.338445	-0.583169	0.284139	-0.272109	0.0262927	-0.171166	0.13686	0.304314	-0.0607179	0.219334	-0.234815	-0.272555	0.15797	0.16057	-0.063494	0.0451222	-0.0982016	-0.0933613	-0.0152636	0.133204	-0.249984	0.195735	-0.369286	0.395856	-0.118433	M3 brown Postsynapse/Glycosylation|0.3973
KISS1|Q15726	brown	-0.22312	0.206797	0.391117	-0.0327222	-0.205988	-0.050536	0.279587	-0.224765	-0.0667375	-0.200544	0.172745	-0.173337	0.133503	0.312891	0.111855	-0.0583313	-0.079465	-0.353205	0.017577	-0.169674	-0.0740381	-0.0524827	-0.16689	-0.0154346	0.107748	0.0322356	-0.157161	0.302322	-0.189618	0.0228595	0.0847942	M3 brown Postsynapse/Glycosylation|0.3911
FLT1|P17948	brown	0.0922781	0.408549	0.39103	-0.412821	0.0140785	0.0739828	0.0732593	-0.162857	0.0586128	0.0807588	0.0983039	-0.106726	-0.0872107	0.113578	-0.0232718	0.112306	-0.280589	0.0320889	0.0910599	0.236405	-0.138441	0.292334	-0.0935529	-0.0412032	-0.21641	-0.0797293	-0.334392	0.461882	-0.436542	0.294996	0.234159	M3 brown Postsynapse/Glycosylation|0.391
CTNNA2|P26232	brown	0.336456	0.430203	0.390379	-0.504771	0.292644	0.287698	0.194247	0.000463481	-0.194809	-0.0468756	0.250214	-0.325203	-0.354904	0.241908	-0.17225	0.00395115	-0.256693	-0.0775142	-0.0812382	0.361708	-0.422652	0.22057	-0.111438	0.207785	-0.059442	-0.0122619	-0.143143	0.385347	-0.254026	0.270013	0.201213	M3 brown Postsynapse/Glycosylation|0.3904
HAVCR2|Q8TDQ0	brown	-0.249751	0.239136	0.384806	-0.0517145	-0.225127	-0.108161	0.290052	-0.314561	0.00396267	-0.355089	0.108038	-0.197493	0.207372	0.330737	0.0985265	0.0900432	-0.0246258	-0.331687	0.194837	-0.117626	-0.0497309	-0.111353	-0.120819	-0.151941	0.0341681	0.0970799	-0.209831	0.17214	-0.119526	-0.0134702	-0.131338	M3 brown Postsynapse/Glycosylation|0.3848
B4GALT3|O60512	brown	0.333131	0.340013	0.384719	-0.375744	0.357777	0.318627	0.268106	-0.0210282	-0.298046	-0.276961	0.210428	-0.535114	-0.363214	0.346811	-0.205281	-0.0652524	-0.148919	-0.182261	-0.0885488	0.243144	-0.595898	0.0369678	-0.0152782	0.165901	0.0415902	0.085705	-0.0563038	0.355083	-0.162449	0.0151029	0.0699295	M3 brown Postsynapse/Glycosylation|0.3847
SSR1|P43307	brown	-0.267136	0.290551	0.383656	-0.102757	-0.174156	-0.030156	0.289928	-0.117178	-0.124463	-0.281245	0.154391	-0.309003	0.309681	0.115866	0.335786	-0.0643911	-0.0284825	-0.0957253	0.27317	-0.359215	-0.0895563	0.0481759	0.0157134	-0.175794	0.109817	-0.00391776	-0.0290473	0.201975	-0.203423	0.0495338	-0.0723017	M3 brown Postsynapse/Glycosylation|0.3837
LAMC2|Q13753	brown	-0.145153	0.230218	0.383314	-0.115629	-0.0788039	0.0320168	0.273819	-0.346671	-0.115761	-0.231067	0.237802	-0.1672	0.075402	0.295637	0.104985	0.0993739	-0.18282	-0.305743	0.0295365	-0.0110607	-0.148414	-0.0256655	-0.0816146	-0.0298782	-0.00105842	0.0923302	-0.231796	0.289794	-0.212566	0.272348	0.0487795	M3 brown Postsynapse/Glycosylation|0.3833
ST3GAL6|Q9Y274	brown	-0.2154	0.212287	0.37504	-0.0314378	-0.148835	-0.249273	0.336925	-0.320131	0.147087	-0.273706	-0.031839	-0.22887	0.132349	0.215243	-0.0741389	0.162074	0.00328099	-0.213047	0.250584	0.0865855	-0.0629956	0.0715685	0.00387713	-0.131732	0.0161797	0.00578498	-0.0936806	0.242702	-0.210163	0.169761	-0.0914925	M3 brown Postsynapse/Glycosylation|0.375
GREM2|Q9H772	brown	0.197013	0.379013	0.374107	-0.47277	0.183808	0.193772	0.212763	-0.0515653	-0.121073	-0.181843	0.101966	-0.392304	-0.206412	0.288715	-0.092189	0.0396442	-0.11254	-0.052194	0.028382	0.161337	-0.364246	0.0895781	-0.00559953	0.0106382	0.0245673	0.125812	-0.0626163	0.329755	-0.131508	0.183412	0.0508286	M3 brown Postsynapse/Glycosylation|0.3741
SIGLEC11|Q96RL6	brown	0.324568	0.378405	0.374092	-0.362559	0.313732	0.247617	0.283751	-0.0579414	-0.121764	-0.14335	0.18761	-0.479514	-0.400503	0.353013	-0.236365	0.00741617	-0.322052	-0.188009	-0.110692	0.435522	-0.56433	0.204346	-0.0559012	0.280251	0.0481186	0.0715594	-0.0987373	0.149395	-0.153408	0.221717	-0.148537	M3 brown Postsynapse/Glycosylation|0.3741
CLPS|P04118	brown	0.00651647	0.268966	0.371051	-0.16121	0.0463258	0.269192	0.321081	-0.155817	-0.384892	-0.389822	0.287053	-0.392006	-0.0297529	0.360754	0.160053	0.0991014	-0.116344	-0.298709	-0.00172642	-0.235295	-0.361355	-0.0996212	-0.0512681	0.0391728	0.120896	0.158899	-0.0817177	0.107304	-0.107457	0.0929156	-0.198461	M3 brown Postsynapse/Glycosylation|0.3711
SPINK2|P20155	brown	0.0326562	0.343519	0.358319	-0.30411	0.100931	0.0531856	0.128768	-0.149163	-0.0101448	-0.110483	0.15274	-0.192488	-0.00857034	0.226069	0.0406683	0.0867058	-0.065112	-0.0816579	0.116816	0.184033	-0.154232	0.15072	0.00720035	-0.0450106	-0.113328	0.0405987	-0.280096	0.256364	-0.216704	0.0898947	-0.0277701	M3 brown Postsynapse/Glycosylation|0.3583
PTN|P21246	brown	-0.37926	0.158221	0.353999	-0.0171141	-0.378108	-0.33756	0.255172	-0.408607	0.169301	-0.406957	-0.184942	-0.117768	0.288288	0.335652	0.00746052	0.311423	0.181049	-0.331727	0.327293	-0.222361	0.143174	-0.167256	-0.0250005	-0.210098	0.22579	0.27594	-0.0430024	0.0887733	-0.153979	0.125195	-0.281471	M3 brown Postsynapse/Glycosylation|0.354
ENG|P17813	brown	0.104371	0.26267	0.348999	0.0301666	-0.189872	0.167281	0.300711	0.00859289	-0.20337	-0.0604119	0.200202	-0.254366	-0.101361	0.0912865	0.0692704	-0.130558	-0.392942	-0.110607	0.018825	-0.0516614	-0.270904	0.232631	-0.39445	0.14327	-0.00477705	-0.157207	-0.0780933	0.276918	-0.201129	0.090154	0.121647	M3 brown Postsynapse/Glycosylation|0.349
PCDH15|Q96QU1	brown	0.06355	0.29236	0.329695	-0.252662	-0.0215225	0.188714	0.184655	-0.237554	-0.138985	0.0742815	0.413431	-0.0762926	-0.135351	0.232767	0.0815671	0.00922668	-0.502897	-0.230803	-0.209959	0.185425	-0.238453	0.10329	-0.282318	0.235562	-0.0516895	0.0547202	-0.315924	0.0545542	-0.270208	0.312642	-0.149048	M3 brown Postsynapse/Glycosylation|0.3297
TNFRSF6B|O95407	brown	-0.172959	0.256185	0.328529	-0.0405131	-0.137184	-0.0649436	0.226957	-0.253494	-0.0264833	-0.203524	0.068028	-0.20356	0.150871	0.215312	0.128807	0.0868971	-0.144091	-0.0450116	0.147862	-0.119997	-0.0923034	0.0304317	0.0128255	-0.15292	-0.031052	0.0897524	-0.14339	0.0491422	-0.157666	0.0739451	-0.226631	M3 brown Postsynapse/Glycosylation|0.3285
DLG4|P78352	brown	0.0983768	0.26247	0.320509	-0.369625	-0.0578302	0.0697812	0.240621	-0.0672021	-0.119856	-0.0194978	0.175696	-0.0950287	-0.0882937	0.0705262	0.0120476	0.22975	-0.287519	-0.0859584	0.0466924	0.13095	-0.127805	0.166511	-0.210343	0.230165	0.0671606	0.158266	0.0151468	0.185372	-0.244375	0.29545	0.066881	M3 brown Postsynapse/Glycosylation|0.3205
KAZALD1|Q96I82	brown	0.0248957	0.297487	0.320306	-0.311221	-0.124382	0.131723	0.174368	-0.0747052	-0.101926	-0.137617	0.0916807	-0.171813	0.0195915	0.231241	0.0647288	0.0632331	-0.0912065	-0.0838058	0.140929	-0.0896115	-0.121662	0.106262	-0.125922	-0.0405454	-0.00318172	0.0895188	-0.130063	0.20479	-0.0815704	0.17615	-0.0420525	M3 brown Postsynapse/Glycosylation|0.3203
NPNT|Q6UXI9	brown	-0.191606	0.209712	0.319941	-0.0161742	-0.244501	-0.177877	0.329129	-0.27799	0.0658351	-0.36027	-0.0245528	-0.218562	0.157492	0.157686	-0.00138646	0.285572	-0.021618	-0.134888	0.261129	-0.0486848	-0.0272857	0.02083	-0.0688634	-0.173322	-0.0133043	0.0540925	-9.31e-05	0.0430975	-0.0850276	0.163513	-0.260821	M3 brown Postsynapse/Glycosylation|0.3199
IARS|P41252	brown	-0.253679	0.166607	0.314698	0.0430227	-0.289641	-0.110082	0.204705	-0.284886	-0.0444956	0.00898871	0.227019	0.026662	0.292114	0.169098	0.268079	0.0700561	-0.265489	-0.21956	0.117404	-0.114791	0.0871266	0.0445162	-0.213809	-0.0261311	-0.0644106	0.00556246	-0.273969	0.0929324	-0.228905	0.222432	-0.117073	M3 brown Postsynapse/Glycosylation|0.3147
SERPINC1|P01008	yellow	-0.0325414	-0.707124	-0.568885	0.892078	-0.116148	-0.160465	-0.226819	0.225778	0.140721	0.172711	-0.280175	0.370502	-0.00548738	-0.128744	-0.139827	-0.282675	0.236116	-0.0116542	-0.26396	-0.0755267	0.308672	-0.450751	-0.0860893	8.94e-05	0.0704079	-0.114248	0.179998	-0.50008	0.599574	-0.360753	-0.0874919	M4 yellow Complement/Coagulation|0.8921
CPB2|Q96IY4	yellow	-0.0911853	-0.627782	-0.476424	0.873002	-0.110856	-0.0795439	-0.197862	0.212986	0.00548795	0.174625	-0.102595	0.353214	0.0944204	-0.148063	0.061402	-0.327115	0.185707	-0.0120733	-0.256377	-0.194547	0.285447	-0.448164	-0.0555377	-0.0607238	0.0623287	-0.198148	0.125767	-0.413131	0.538673	-0.362789	-0.0353902	M4 yellow Complement/Coagulation|0.873
C5|P01031	yellow	-0.166573	-0.480017	-0.32958	0.856853	-0.165137	-0.22529	-0.00347956	0.0277316	0.10977	-0.0827455	-0.228003	0.0824291	0.0261514	-0.084242	-0.137838	-0.329621	0.20113	-0.102876	-0.155959	-0.126549	0.118178	-0.359918	-0.0954855	-0.0901458	0.131614	-0.0704611	0.176797	-0.31193	0.3826	-0.402301	-0.0964384	M4 yellow Complement/Coagulation|0.8569
CFI|P05156	yellow	-0.0531385	-0.643224	-0.534079	0.854802	-0.182974	-0.192634	-0.245109	0.175731	0.207	0.206923	-0.301112	0.373641	-0.0198564	-0.129128	-0.187291	-0.314831	0.190085	0.0218903	-0.240445	-0.0217117	0.298823	-0.370161	-0.139263	-0.01711	0.0485052	-0.0844372	0.139206	-0.504277	0.517427	-0.4111	-0.156577	M4 yellow Complement/Coagulation|0.8548
SERPINA4|P29622	yellow	-0.135693	-0.585196	-0.437333	0.847441	-0.184583	-0.236492	-0.172276	0.138872	0.167518	0.0626848	-0.323736	0.242421	0.0653852	-0.131127	-0.139243	-0.209098	0.343628	-0.0220661	-0.111274	-0.141128	0.262276	-0.391097	-0.0621503	-0.161865	0.0886708	-0.127232	0.168333	-0.341586	0.465695	-0.427683	-0.0507787	M4 yellow Complement/Coagulation|0.8474
ITIH1|P19827	yellow	-0.208634	-0.474184	-0.27242	0.846697	-0.192473	-0.214693	0.0214241	-0.0984996	0.108367	-0.0561533	-0.147443	0.141659	0.054471	0.0050595	-0.0975468	-0.338886	0.0993124	-0.15858	-0.166173	-0.0965793	0.147908	-0.406802	-0.118537	-0.133004	0.0729716	-0.111923	0.0517461	-0.313427	0.335945	-0.32881	-0.136606	M4 yellow Complement/Coagulation|0.8467
KLKB1|P03952	yellow	-0.171575	-0.496512	-0.347989	0.846529	-0.212679	-0.263429	-0.122945	0.0724287	0.167646	0.0339382	-0.291356	0.199578	0.0933787	-0.108556	-0.110338	-0.260825	0.237296	-0.0606472	-0.0810671	-0.133539	0.229673	-0.339876	-0.0820192	-0.147596	0.0578112	-0.111211	0.0812417	-0.261084	0.36644	-0.451168	-0.0367988	M4 yellow Complement/Coagulation|0.8465
CFB|P00751	yellow	-0.207803	-0.540693	-0.396866	0.842696	-0.245665	-0.23754	-0.143678	0.0522504	0.164762	0.0485958	-0.231934	0.272774	0.133186	-0.132756	-0.0663348	-0.266314	0.203645	-0.024062	-0.1087	-0.166623	0.284866	-0.379899	-0.109107	-0.127553	0.0708057	-0.0670553	0.126514	-0.433964	0.413775	-0.380047	-0.192579	M4 yellow Complement/Coagulation|0.8427
SERPINA7|P05543	yellow	-0.0435173	-0.606393	-0.57649	0.841799	-0.0979537	-0.156895	-0.30832	0.177746	0.182251	0.187033	-0.283194	0.372385	-0.0267167	-0.197003	-0.170441	-0.288869	0.236104	0.0553417	-0.253371	-0.0204912	0.297024	-0.351089	-0.0476896	-0.0281336	0.00424212	-0.0998147	0.125658	-0.549883	0.496963	-0.391119	-0.202095	M4 yellow Complement/Coagulation|0.8418
AFM|P43652	yellow	-0.116159	-0.603118	-0.497306	0.811641	-0.17982	-0.237379	-0.220885	0.154167	0.209127	0.113636	-0.328454	0.310312	0.0763763	-0.192939	-0.142115	-0.221839	0.240997	0.0565696	-0.0981059	-0.104422	0.315729	-0.364562	-0.0642438	-0.121813	0.0377491	-0.119768	0.167185	-0.407384	0.445688	-0.471302	-0.106675	M4 yellow Complement/Coagulation|0.8116
ITIH2|P19823	yellow	-0.14996	-0.492749	-0.302504	0.810641	-0.143054	-0.210942	0.0352329	-0.0863627	0.128332	-0.0693167	-0.19213	0.114009	-0.0372663	0.0371255	-0.183349	-0.357805	0.111514	-0.173584	-0.204501	-0.0281825	0.108533	-0.404976	-0.0887817	-0.0634573	0.118274	-0.0589528	0.0984744	-0.322385	0.35066	-0.356301	-0.149369	M4 yellow Complement/Coagulation|0.8106
RTN4|Q9NQC3	yellow	-0.176073	-0.537002	-0.400953	0.805217	-0.0692228	-0.108672	-0.166812	0.094725	0.0185463	0.0879873	-0.0842182	0.301557	0.125979	-0.0578661	0.0898701	-0.242964	0.246712	-0.081191	-0.196832	-0.227752	0.266533	-0.406953	0.0849978	-0.124432	0.0641006	-0.158978	0.0695317	-0.394136	0.465212	-0.293271	-0.0889588	M4 yellow Complement/Coagulation|0.8052
ERP29|P30040	yellow	-0.377821	-0.604962	-0.344104	0.798255	-0.223467	-0.23581	-0.100807	-0.0273451	0.0810775	-7.01e-05	-0.119551	0.314187	0.332036	0.0374216	0.198621	-0.252149	0.296866	-0.126779	-0.122495	-0.387605	0.398963	-0.579168	0.0556178	-0.268076	0.091956	-0.0330413	0.0335676	-0.341861	0.488526	-0.366238	-0.0509984	M4 yellow Complement/Coagulation|0.7983
F13B|P05160	yellow	-0.175936	-0.511259	-0.355279	0.788867	-0.225897	-0.225833	-0.110037	0.0591707	0.18152	-0.0319598	-0.260824	0.219596	0.105507	-0.043829	-0.0796701	-0.277884	0.215854	-0.104237	-0.0904308	-0.16436	0.255771	-0.399428	-0.101773	-0.137748	0.0526365	-0.0974818	0.0665145	-0.314849	0.410236	-0.327052	-0.0791549	M4 yellow Complement/Coagulation|0.7889
SERPINF2|P08697	yellow	-0.317328	-0.345546	-0.0995895	0.78682	-0.353053	-0.382667	0.123925	-0.0877625	0.180053	-0.202447	-0.28791	0.0288271	0.219373	0.0483764	-0.0792495	-0.129111	0.238874	-0.210084	0.0890186	-0.246254	0.199177	-0.351409	-0.120276	-0.201795	0.177128	4.9e-05	0.119335	-0.147544	0.307305	-0.305831	-0.118605	M4 yellow Complement/Coagulation|0.7868
IL1R2|P27930	yellow	-0.172909	-0.452364	-0.246824	0.786527	-0.211991	-0.271919	-0.0181356	0.0493516	0.178676	-0.0244362	-0.235691	0.158878	0.0763525	-0.0559348	-0.160703	-0.207366	0.196147	-0.114382	-0.040298	-0.0456667	0.198278	-0.338872	-0.147159	-0.117961	0.0612246	-0.161165	0.0738274	-0.192737	0.346175	-0.310389	0.00623215	M4 yellow Complement/Coagulation|0.7865
C6|P13671	yellow	-0.16621	-0.497896	-0.326638	0.785459	-0.231602	-0.22524	0.0130411	0.04819	0.110417	-0.00626849	-0.192295	0.180894	0.000942626	0.0236013	-0.116192	-0.367345	0.145538	-0.184551	-0.20286	-0.171701	0.182574	-0.404274	-0.18001	0.0277421	0.178608	-0.0312712	0.136197	-0.34842	0.399944	-0.333605	-0.112035	M4 yellow Complement/Coagulation|0.7855
NPS|P0C0P6	yellow	-0.393001	-0.497857	-0.236147	0.78528	-0.390738	-0.430399	-0.043423	-0.169648	0.308521	-0.0138187	-0.310327	0.335751	0.329837	0.131848	0.0108861	-0.0557564	0.268002	-0.176684	0.0496568	-0.208833	0.446007	-0.425444	-0.022697	-0.253874	0.0498173	0.0357599	-0.0751153	-0.391333	0.356641	-0.307877	-0.326345	M4 yellow Complement/Coagulation|0.7853
ADAMTS13|Q76LX8	yellow	-0.321153	-0.392177	-0.11132	0.781447	-0.410065	-0.378454	0.153829	-0.158319	0.222572	-0.135623	-0.243747	0.11113	0.157939	0.11621	-0.111458	-0.252124	0.0847802	-0.304497	-0.0152552	-0.153472	0.201253	-0.342721	-0.24076	-0.104799	0.139357	-0.0343903	0.0290316	-0.177506	0.236503	-0.288239	-0.105629	M4 yellow Complement/Coagulation|0.7814
FETUB|Q9UGM5	yellow	-0.260614	-0.388586	-0.20875	0.773061	-0.21272	-0.287486	-0.0125062	-0.0303683	0.182871	-0.110721	-0.252751	0.0744259	0.150487	-0.0209426	-0.0432248	-0.229836	0.266787	-0.0944573	-0.0151132	-0.185658	0.201428	-0.341926	-0.0264951	-0.264354	0.0471451	-0.0252545	0.0281017	-0.251819	0.314916	-0.384613	-0.142902	M4 yellow Complement/Coagulation|0.7731
SEMG1|P04279	yellow	-0.344546	-0.360264	-0.0622188	0.772475	-0.418125	-0.339651	0.215869	-0.104074	0.170625	-0.222514	-0.238398	0.0264295	0.20257	0.115892	0.00321276	-0.254308	0.133423	-0.248092	0.024128	-0.281483	0.196065	-0.369605	-0.174712	-0.15609	0.197391	-0.0310914	0.140351	-0.11118	0.281857	-0.224688	-0.0631369	M4 yellow Complement/Coagulation|0.7725
HPX|P02790	yellow	0.0322479	-0.587446	-0.486573	0.765818	-0.00312401	0.0454519	-0.13222	0.167091	-0.0762176	0.119985	-0.0250126	0.257945	-0.127633	-0.0340582	-0.0844277	-0.368642	0.0412373	-0.0868687	-0.411516	-0.0615493	0.0900289	-0.454103	-0.121012	0.132572	0.0743533	-0.118991	0.148805	-0.568831	0.582478	-0.326548	-0.2014	M4 yellow Complement/Coagulation|0.7658
AMHR2|Q16671	yellow	-0.0197681	-0.612165	-0.51559	0.763457	-0.0803057	-0.111701	-0.273146	0.12929	0.154292	0.276943	-0.206474	0.434125	-0.0570743	-0.0493029	-0.187267	-0.261448	0.15683	-0.069186	-0.295832	0.0309582	0.266143	-0.363912	-0.125851	0.0238724	0.0291037	-0.102372	0.0424014	-0.485114	0.477925	-0.277576	-0.162777	M4 yellow Complement/Coagulation|0.7635
HGFAC|Q04756	yellow	-0.225152	-0.477217	-0.299708	0.762698	-0.338525	-0.367121	-0.0995803	0.0588119	0.273251	0.02464	-0.392459	0.251952	0.166579	-0.122551	-0.146877	-0.207884	0.237053	-0.0321062	0.070948	-0.142455	0.353495	-0.252388	-0.130285	-0.135352	0.0550403	-0.171099	0.0967787	-0.242633	0.353047	-0.253371	-0.0122657	M4 yellow Complement/Coagulation|0.7627
HNF4A|P41235	yellow	-0.347897	-0.589563	-0.443909	0.762689	-0.253812	-0.436005	-0.206751	-0.00834858	0.370017	-0.00406186	-0.420511	0.323779	0.269225	-0.112367	-0.0774451	-0.115722	0.416216	0.0197511	0.0623792	-0.157176	0.461316	-0.40286	0.0950637	-0.28295	-0.0115928	-0.0975553	0.0808507	-0.348995	0.416496	-0.310468	-0.0826396	M4 yellow Complement/Coagulation|0.7627
CPT1B|Q92523	yellow	0.0142295	-0.464024	-0.403808	0.76028	0.006703	-0.024824	-0.211246	0.182267	0.0582553	0.141992	-0.0963934	0.237901	-0.000348596	-0.247355	-0.0161851	-0.292118	0.078104	0.109178	-0.196689	-0.0337234	0.179447	-0.235638	0.000887711	-0.0625345	-0.0804305	-0.284683	0.0555113	-0.251198	0.334556	-0.238132	0.054217	M4 yellow Complement/Coagulation|0.7603
APOH|P02749	yellow	-0.103042	-0.670759	-0.565099	0.756387	-0.104086	-0.186188	-0.257066	0.224693	0.141668	0.151739	-0.246106	0.358951	0.0991981	-0.139488	-0.0689859	-0.24369	0.290575	0.0421156	-0.164211	-0.136992	0.320816	-0.457083	-0.0283445	-0.0572129	0.0859406	-0.0872785	0.1851	-0.524873	0.583556	-0.469738	-0.130817	M4 yellow Complement/Coagulation|0.7564
RBP4|P02753	yellow	-0.166144	-0.490636	-0.346592	0.753465	-0.131478	-0.255811	-0.0823466	0.040404	0.200421	-0.0861631	-0.308653	0.152055	0.0949488	-0.0442965	-0.136619	-0.145131	0.337349	-0.0687021	-0.0364035	-0.0906479	0.231808	-0.385337	0.03241	-0.175832	0.0447658	-0.0576252	0.121747	-0.28286	0.427292	-0.391638	-0.143706	M4 yellow Complement/Coagulation|0.7535
SERPINA3|P01011	yellow	-0.331666	-0.620729	-0.367779	0.746859	-0.212889	-0.295198	-0.0289945	-0.0200373	0.164667	-0.0392913	-0.232463	0.177556	0.19261	0.0264895	-0.00853403	-0.272377	0.272256	-0.12924	-0.117943	-0.249411	0.244418	-0.51042	-0.00307238	-0.13865	0.140918	-0.00863618	0.121408	-0.408759	0.433759	-0.434122	-0.115761	M4 yellow Complement/Coagulation|0.7469
KLK3|P07288	yellow	-0.3331	-0.620834	-0.366744	0.746476	-0.213961	-0.296857	-0.0280152	-0.0200371	0.16509	-0.0393914	-0.232466	0.17772	0.193436	0.0281246	-0.00783968	-0.273564	0.272946	-0.131188	-0.117784	-0.250523	0.24529	-0.511145	-0.00318133	-0.138283	0.142089	-0.00854322	0.121141	-0.408255	0.434307	-0.434223	-0.114545	M4 yellow Complement/Coagulation|0.7465
F9|P00740	yellow	-0.215213	-0.373088	-0.162048	0.746119	-0.148155	-0.156013	0.0570441	-0.0389641	-0.00245236	-0.0711056	-0.0908648	0.0626915	0.0699578	0.13624	-0.0253558	-0.315796	0.162914	-0.243592	-0.181947	-0.210842	0.0784589	-0.438981	-0.110791	-0.115282	0.162877	-0.0418199	0.014262	-0.273015	0.378565	-0.39211	-0.151827	M4 yellow Complement/Coagulation|0.7461
PGLYRP2|Q96PD5	yellow	0.157738	-0.456295	-0.3483	0.744266	0.0691577	0.20073	-0.0900367	0.17556	-0.217998	0.102625	0.0853718	0.160752	-0.233958	0.00284257	-0.0837272	-0.417977	-0.0183444	-0.142235	-0.482451	-0.0249414	-0.0479404	-0.393051	-0.183612	0.141923	0.0952433	-0.183229	0.0859685	-0.359084	0.489449	-0.313498	-0.0638362	M4 yellow Complement/Coagulation|0.7443
C2|P06681	yellow	0.0432312	-0.317717	-0.179222	0.736314	-0.0505445	-0.00484933	0.0142074	0.148178	-0.0550989	-0.0173784	-0.0850576	0.0224777	-0.117438	-0.0369777	-0.182216	-0.3203	0.059118	-0.104922	-0.163354	-0.00878043	-0.0291008	-0.261916	-0.225935	0.0163488	0.0394383	-0.181769	0.0509313	-0.243493	0.349092	-0.326182	-0.0903464	M4 yellow Complement/Coagulation|0.7363
AZGP1|P25311	yellow	-0.042459	-0.519316	-0.445339	0.730249	0.0505169	0.00890027	-0.222337	0.225593	-0.0351164	0.103159	-0.0699632	0.232585	0.0627786	-0.207917	0.0740688	-0.188883	0.223973	0.0850582	-0.197581	-0.155017	0.188543	-0.37163	0.0931332	-0.112143	-0.0139092	-0.215824	0.0823337	-0.302346	0.4504	-0.315256	0.0270017	M4 yellow Complement/Coagulation|0.7302
DPEP2|Q9H4A9	yellow	-0.459646	-0.330584	-0.0163407	0.727818	-0.327818	-0.329508	0.134751	-0.164812	0.0979256	-0.230285	-0.115203	0.1033	0.418979	0.150768	0.22643	-0.100795	0.245125	-0.183487	0.129655	-0.374059	0.297842	-0.408958	0.0225156	-0.339347	0.0252591	-0.0394358	-0.103417	-0.139639	0.226858	-0.267019	-0.0969584	M4 yellow Complement/Coagulation|0.7278
F11|P03951	yellow	-0.354821	-0.447527	-0.248583	0.724381	-0.25509	-0.157404	-0.0399251	-0.0201398	-0.0168691	-0.0245151	-0.0205677	0.242975	0.306801	-0.00339246	0.277996	-0.224733	0.194773	-0.140271	-0.107877	-0.487761	0.329671	-0.469137	0.0278907	-0.174297	0.130582	-0.0583212	0.0201171	-0.287374	0.374967	-0.323503	-0.0792972	M4 yellow Complement/Coagulation|0.7244
HEXB|P07686	yellow	-0.177018	-0.392025	-0.145121	0.718344	-0.132109	0.0223246	0.0463478	-0.0876472	-0.165989	-0.0293939	0.121395	0.195346	0.105092	0.227659	0.131137	-0.251625	0.0584312	-0.285552	-0.267333	-0.26698	0.131188	-0.507992	-0.101598	-0.0718546	0.0825134	-0.015053	-0.135758	-0.414642	0.425453	-0.269665	-0.303564	M4 yellow Complement/Coagulation|0.7183
C9|P02748	yellow	-0.089059	-0.400269	-0.245029	0.717572	-0.107331	-0.10315	-0.0294494	0.0712228	-0.000425956	-0.0299936	-0.14002	0.0567127	-0.0165998	0.0113611	-0.116513	-0.31052	0.154748	-0.143991	-0.192103	-0.126557	0.042466	-0.389622	-0.13779	-0.044661	0.176404	0.0127663	0.140936	-0.308987	0.374689	-0.336114	-0.166086	M4 yellow Complement/Coagulation|0.7176
TREML2|Q5T2D2	yellow	0.0130664	-0.458647	-0.404892	0.716505	-0.0383389	-0.0644681	-0.192611	0.215572	0.0711117	0.136693	-0.175701	0.230058	-0.0434826	-0.0955891	-0.0986396	-0.271666	0.14056	0.0335265	-0.202423	-0.0265768	0.152284	-0.265109	-0.0564026	0.00427237	-0.0549288	-0.16035	0.0655149	-0.390901	0.454898	-0.210783	-0.084085	M4 yellow Complement/Coagulation|0.7165
F2|P00734	yellow	-0.29562	-0.327401	0.0115907	0.716372	-0.246967	-0.0884934	0.163382	-0.194696	-0.121492	-0.0829242	0.139088	0.171296	0.199305	0.265698	0.181962	-0.264978	-0.01549	-0.365649	-0.180229	-0.269973	0.167691	-0.501844	-0.223851	-0.121526	0.0629221	-0.0454215	-0.179983	-0.202858	0.285586	-0.203495	-0.119151	M4 yellow Complement/Coagulation|0.7164
CFP|P27918	yellow	0.0100151	-0.527908	-0.543687	0.708075	-0.0715771	-0.0194885	-0.266568	0.257704	0.0217344	0.248739	-0.163528	0.292019	-0.0470297	-0.292869	-0.0825869	-0.39484	0.119063	0.110175	-0.271353	-0.12045	0.169819	-0.219846	-0.0952878	-0.0026725	0.0378586	-0.191953	0.211723	-0.394025	0.393342	-0.404786	-0.00341406	M4 yellow Complement/Coagulation|0.7081
CPN2|P22792	yellow	-0.269425	-0.340821	-0.0863443	0.708112	-0.303268	-0.265311	0.231352	-0.112989	0.120823	-0.203354	-0.156732	-0.0573075	0.073603	0.146962	-0.0755934	-0.262699	0.00981869	-0.284307	-0.054886	-0.210722	0.035124	-0.338302	-0.154638	-0.0449948	0.179295	-0.00585931	0.0745028	-0.177425	0.274182	-0.238507	-0.115953	M4 yellow Complement/Coagulation|0.7081
IGFALS|P35858	yellow	0.0552285	-0.482767	-0.441532	0.702445	0.0193768	0.0044748	-0.269259	0.247949	-0.00940035	0.19908	-0.130535	0.276459	-0.0593475	-0.149663	-0.0770479	-0.253794	0.211656	0.0316897	-0.288476	-0.0810391	0.155884	-0.32652	-0.0261183	-0.0170125	0.0310499	-0.138793	0.100259	-0.366461	0.454087	-0.3993	-0.059541	M4 yellow Complement/Coagulation|0.7024
TNFRSF25|Q93038	yellow	-0.0420163	-0.58267	-0.513689	0.698899	-0.0706852	-0.123531	-0.295489	0.173027	0.136085	0.288748	-0.192027	0.444436	0.00696305	-0.0843854	-0.0974417	-0.226682	0.198	-0.0105612	-0.245135	-0.0443713	0.325136	-0.318928	-0.0545836	0.00487332	0.0342943	-0.105304	0.0644096	-0.481988	0.464779	-0.219375	-0.119854	M4 yellow Complement/Coagulation|0.6989
MUC15|Q8N387	yellow	-0.292819	-0.475543	-0.339936	0.69749	-0.224373	-0.502324	-0.197669	-0.00166632	0.42504	-0.000534856	-0.508906	0.313352	0.230863	-0.0466595	-0.219552	-0.0757798	0.566484	-0.0468688	0.161586	-0.0269387	0.468112	-0.304797	0.0785461	-0.314672	0.0548796	-0.0513458	0.0576321	-0.232372	0.294972	-0.33289	-0.0822026	M4 yellow Complement/Coagulation|0.6975
TNFAIP6|P98066	yellow	-0.291675	-0.42524	-0.047116	0.697328	-0.38684	-0.306048	0.230664	-0.117282	0.151941	-0.0675626	-0.188404	0.0787662	0.148145	0.245702	-0.0320946	-0.267213	-0.0185317	-0.310315	-0.0749809	-0.200071	0.155458	-0.415934	-0.208035	-0.0595557	0.243985	0.0530197	0.0938613	-0.162091	0.291144	-0.210982	-0.106442	M4 yellow Complement/Coagulation|0.6973
VTN|P04004	yellow	-0.267084	-0.444487	-0.240549	0.696611	-0.204692	-0.105907	0.00114284	-0.154683	-0.0179665	0.018533	0.0211923	0.282362	0.11104	0.177185	0.103847	-0.301918	0.071679	-0.243436	-0.301612	-0.282284	0.227074	-0.513605	-0.0750617	-0.0483222	0.119361	0.0421507	-0.0822229	-0.422418	0.356794	-0.268565	-0.259471	M4 yellow Complement/Coagulation|0.6966
SERPINA5|P05154	yellow	-0.25272	-0.479955	-0.32274	0.689821	-0.222923	-0.324439	-0.0539679	0.0101288	0.216487	-0.134397	-0.331403	0.132132	0.233708	-0.0860824	-0.0901212	-0.0818178	0.378635	-0.00393606	0.0837424	-0.171643	0.25768	-0.347808	0.029622	-0.227456	0.102557	-0.0191992	0.21694	-0.306153	0.41713	-0.390487	-0.146766	M4 yellow Complement/Coagulation|0.6898
APCS|P02743	yellow	-0.0774474	-0.375647	-0.237688	0.685351	-0.0702992	-0.0740291	-0.00774377	0.0627549	-0.0164741	-0.0474597	-0.0602893	0.0581958	-0.0675759	0.017575	-0.0926438	-0.31256	0.092027	-0.176951	-0.259666	-0.114668	0.0159488	-0.349403	-0.117011	-0.00711075	0.108577	-0.0694529	0.0560388	-0.291036	0.348326	-0.372011	-0.100195	M4 yellow Complement/Coagulation|0.6854
PRSS8|Q16651	yellow	-0.410364	-0.247285	0.018329	0.678828	-0.332279	-0.265651	0.137308	-0.238009	0.0744329	-0.176834	-0.0842664	0.0970704	0.319663	0.226878	0.171941	-0.0876868	0.164934	-0.280345	0.0379953	-0.342678	0.234673	-0.379103	-0.0236616	-0.290565	0.0784283	0.0157285	-0.15187	-0.166715	0.225898	-0.227003	-0.234314	M4 yellow Complement/Coagulation|0.6788
LILRA5|A6NI73	yellow	-0.366048	-0.277978	-0.111122	0.674972	-0.180627	-0.153101	0.0710917	-0.158669	0.00188704	-0.225894	-0.0748413	0.0408357	0.22796	0.102775	0.130623	-0.267007	0.286052	-0.182962	-0.0113829	-0.362087	0.126758	-0.380433	0.100696	-0.254906	0.0463531	-0.031361	-0.0338439	-0.260023	0.240646	-0.323612	-0.280186	M4 yellow Complement/Coagulation|0.675
LUM|P51884	yellow	-0.373658	-0.268792	-0.0559965	0.673877	-0.301062	-0.431686	0.064822	-0.0810957	0.259417	-0.206978	-0.333982	0.0191889	0.348844	-0.036234	0.00305665	-0.0102107	0.363495	-0.0636488	0.257965	-0.226885	0.266591	-0.204494	0.0648727	-0.406693	0.0377026	-0.0844233	0.0505857	-0.127226	0.234534	-0.257354	-0.143315	M4 yellow Complement/Coagulation|0.6739
APOM|O95445	yellow	-0.00789636	-0.450782	-0.289683	0.672908	-0.0510803	0.00622406	-0.0749391	0.0250522	0.0237184	0.0908627	-0.0331267	0.262061	-0.0676283	0.0608643	-0.0786699	-0.303107	-0.0357213	-0.143178	-0.320651	0.0169088	0.129545	-0.354878	-0.193506	0.0471163	-0.0041258	-0.103961	-0.0639007	-0.239544	0.327371	-0.272156	-0.0142959	M4 yellow Complement/Coagulation|0.6729
IGHG4|P01861	yellow	-0.113235	-0.533447	-0.396281	0.66811	-0.128365	-0.0743833	-0.156606	0.107423	0.0275836	0.190017	-0.0304608	0.357039	0.08285	-0.00752641	0.0842784	-0.184432	0.0673268	-0.10336	-0.26228	-0.180501	0.255582	-0.393354	-0.0950284	-0.0139564	0.0554569	-0.115069	0.0256416	-0.400234	0.410021	-0.273202	-0.0789766	M4 yellow Complement/Coagulation|0.6681
IGL|P0DOX8	yellow	-0.113877	-0.53141	-0.394579	0.66737	-0.127245	-0.0733755	-0.156348	0.106271	0.0255749	0.189401	-0.0277833	0.356045	0.0841257	-0.00818238	0.0838427	-0.18438	0.0673082	-0.103967	-0.260716	-0.179435	0.254046	-0.392594	-0.0960047	-0.0144986	0.0540294	-0.117694	0.0240224	-0.399657	0.408949	-0.272969	-0.0800816	M4 yellow Complement/Coagulation|0.6674
IGHG1|P01857	yellow	-0.113501	-0.530403	-0.394251	0.6673	-0.12583	-0.0721572	-0.156556	0.105903	0.024146	0.189478	-0.0261616	0.355506	0.0842203	-0.00915895	0.0832206	-0.184674	0.0666831	-0.103656	-0.260435	-0.178335	0.252658	-0.391899	-0.0964099	-0.0143066	0.0528272	-0.119335	0.0230994	-0.400485	0.408544	-0.272969	-0.0816532	M4 yellow Complement/Coagulation|0.6673
IGHG3|P01860	yellow	-0.114615	-0.532062	-0.394249	0.667147	-0.128815	-0.0745012	-0.156126	0.10662	0.0262952	0.189139	-0.0288652	0.356527	0.084721	-0.00704742	0.0844608	-0.184397	0.0685254	-0.104749	-0.260471	-0.180925	0.255381	-0.3936	-0.0960702	-0.014751	0.0554887	-0.116471	0.0248881	-0.398824	0.409417	-0.273197	-0.0788188	M4 yellow Complement/Coagulation|0.6671
IGK|P0DOX7	yellow	-0.114638	-0.53047	-0.393279	0.666773	-0.127348	-0.0732261	-0.156149	0.10585	0.0244489	0.188918	-0.0265762	0.355712	0.0853355	-0.00800945	0.0838441	-0.184556	0.0680673	-0.104797	-0.25959	-0.179681	0.253749	-0.39277	-0.09677	-0.0148672	0.0540166	-0.118756	0.0235302	-0.399113	0.408651	-0.273078	-0.0803612	M4 yellow Complement/Coagulation|0.6668
MIA|Q16674	yellow	0.0357178	-0.699592	-0.56463	0.664677	-4.49e-05	-0.0428128	-0.209023	0.279722	0.027565	0.205697	-0.117132	0.343129	-0.0433164	-0.0871548	-0.113888	-0.230754	0.197465	0.0235639	-0.311868	-0.0467163	0.21371	-0.457	-0.0401173	0.100314	0.0616275	-0.0861317	0.184225	-0.567989	0.650356	-0.323905	-0.101036	M4 yellow Complement/Coagulation|0.6647
LMAN2|Q12907	yellow	-0.581955	-0.463631	-0.226247	0.663966	-0.427948	-0.501265	-0.109256	-0.235223	0.301872	0.0210442	-0.22845	0.478026	0.532459	0.0146772	0.212894	-0.0671116	0.340807	-0.123884	0.101768	-0.380132	0.636485	-0.437934	0.0713398	-0.366902	0.0331424	0.0354488	-0.117962	-0.301993	0.229172	-0.292183	-0.14195	M4 yellow Complement/Coagulation|0.664
ADIPOQ|Q15848	yellow	-0.46379	-0.288884	-0.0204387	0.661406	-0.275699	-0.281665	0.137358	-0.196813	0.0643	-0.200803	-0.0550719	0.0284655	0.366223	0.105719	0.242677	-0.173923	0.222028	-0.235851	0.0129395	-0.425903	0.208054	-0.385652	0.0592736	-0.308691	0.138992	-0.0122279	-0.0259764	-0.0847502	0.185654	-0.175548	-0.0335825	M4 yellow Complement/Coagulation|0.6614
INHBC|P55103	yellow	-0.406701	-0.331443	-0.0563222	0.65905	-0.377128	-0.366478	0.221277	-0.290499	0.157136	-0.264571	-0.184329	0.0414066	0.176184	0.281182	-0.0795862	-0.28162	0.165273	-0.396029	-0.0454889	-0.23788	0.162311	-0.469868	-0.129627	-0.137568	0.228707	0.134503	0.0349679	-0.228449	0.267317	-0.333117	-0.256059	M4 yellow Complement/Coagulation|0.659
STOX1|Q6ZVD7	yellow	-0.104985	-0.530624	-0.441192	0.655472	-0.163305	-0.230787	-0.359298	0.214159	0.302328	0.465481	-0.263224	0.549947	0.13616	-0.184563	-0.0263107	-0.261453	0.153921	0.102159	-0.112337	-0.0130265	0.468979	-0.196619	-0.0768484	-0.0770063	-0.0494096	-0.227416	-0.0209764	-0.348154	0.358078	-0.169887	0.0360928	M4 yellow Complement/Coagulation|0.6555
COMP|P49747	yellow	-0.348886	-0.384414	-0.2445	0.643978	-0.280095	-0.360169	-0.0974323	0.0177294	0.291081	-0.0346941	-0.326929	0.247764	0.33302	-0.0624566	0.0906238	-0.0759086	0.37673	0.00626258	0.11243	-0.312366	0.438363	-0.289344	0.121728	-0.334803	0.0426301	-0.0409689	0.0542769	-0.222433	0.291792	-0.293825	-0.0832472	M4 yellow Complement/Coagulation|0.644
ITIH4|Q14624	yellow	-0.320569	-0.308451	0.0866634	0.642517	-0.171149	-0.0800633	0.343277	-0.30828	-0.134978	-0.296063	0.164883	-0.101365	0.100242	0.460556	0.132178	-0.388847	-0.0185018	-0.52324	-0.268518	-0.297629	-0.0811208	-0.610131	-0.127655	-0.0748274	0.272843	0.12693	-0.0639511	-0.204876	0.259138	-0.283978	-0.232192	M4 yellow Complement/Coagulation|0.6425
C1RL|Q9NZP8	yellow	-0.482639	-0.347651	-0.14482	0.640922	-0.451855	-0.456067	-0.0486321	-0.0797894	0.270837	-0.0316178	-0.311066	0.264343	0.468512	0.0040006	0.147886	-0.0835361	0.358672	-0.0616704	0.200027	-0.432593	0.487713	-0.307676	-0.00446151	-0.364943	0.0890035	0.0951936	0.00846981	-0.210829	0.22925	-0.259115	-0.141682	M4 yellow Complement/Coagulation|0.6409
F10|P00742	yellow	-0.442322	-0.210644	0.0768366	0.640534	-0.301945	-0.264921	0.189584	-0.250301	0.0587535	-0.22635	-0.0685325	-0.0232283	0.31073	0.233811	0.197894	-0.157865	0.163458	-0.294541	0.0228958	-0.375961	0.132285	-0.394502	1.85e-05	-0.293385	0.171942	0.0544632	-0.0747702	-0.129633	0.170764	-0.260177	-0.207926	M4 yellow Complement/Coagulation|0.6405
CDH3|P22223	yellow	-0.245596	-0.474981	-0.451753	0.640436	-0.165703	-0.366812	-0.225302	0.00191052	0.36254	-0.0747585	-0.485306	0.258176	0.215832	-0.147135	-0.134875	-0.00737177	0.514218	0.137452	0.152408	-0.0727062	0.380612	-0.289966	0.169144	-0.329125	-0.0637169	-0.061526	0.0781792	-0.315962	0.3734	-0.412396	-0.169274	M4 yellow Complement/Coagulation|0.6404
TF|P02787	yellow	-0.0776317	-0.350615	-0.325619	0.633408	0.00746023	-0.113241	-0.237139	0.135026	0.0873193	0.151097	-0.143839	0.277479	0.0948386	-0.209321	-0.0268104	-0.218359	0.191253	0.0822771	-0.0278799	-0.0231327	0.246826	-0.15538	0.0668341	-0.184012	-0.171416	-0.320861	-0.11622	-0.242953	0.269195	-0.274007	-0.0187338	M4 yellow Complement/Coagulation|0.6334
FABP1|P07148	yellow	-0.175086	-0.340497	-0.184221	0.629036	-0.145273	-0.290206	0.0095117	-0.0794604	0.232887	-0.072723	-0.24315	0.104613	0.0376438	0.0699826	-0.151647	-0.113076	0.217562	-0.106323	-0.0545979	0.0213527	0.169477	-0.288232	-0.038515	-0.128949	0.00188759	-0.0335951	-0.0128031	-0.26414	0.310605	-0.169374	-0.134516	M4 yellow Complement/Coagulation|0.629
AMELX|Q99217	yellow	-0.229882	-0.570224	-0.382822	0.625273	-0.242752	-0.182934	-0.252209	0.0840642	0.119296	0.21445	-0.121545	0.521146	0.222993	0.013222	0.0824788	-0.189864	0.298977	-0.124869	-0.141274	-0.21489	0.475787	-0.457103	-0.0980248	-0.109694	0.0822008	-0.0211466	-0.0183588	-0.368252	0.413026	-0.334494	-0.0509374	M4 yellow Complement/Coagulation|0.6253
MATN2|O00339	yellow	0.0446278	-0.637607	-0.376141	0.625073	-0.136802	-0.0825469	0.036171	0.0862518	0.0453112	0.106591	-0.144031	0.244581	-0.179276	0.221777	-0.278335	-0.298656	0.0277799	-0.251387	-0.370805	0.0542347	0.106259	-0.50105	-0.254432	0.232856	0.215448	0.129881	0.17816	-0.537144	0.629642	-0.232379	-0.211643	M4 yellow Complement/Coagulation|0.6251
LILRA3|Q8N6C8	yellow	-0.0805457	-0.239079	-0.15732	0.622025	-0.178615	-0.236905	-0.142671	0.132305	0.263184	0.146634	-0.279283	0.161869	0.0739521	-0.124936	-0.101611	-0.153164	0.109454	0.0492149	0.0362592	0.000612579	0.21372	-0.0827415	-0.143138	-0.215529	-0.100946	-0.169993	-0.111554	-0.137462	0.176694	-0.270746	-0.0240189	M4 yellow Complement/Coagulation|0.622
SHH|Q15465	yellow	0.0695374	-0.59627	-0.439358	0.620894	0.0646246	0.154022	-0.0889409	0.212448	-0.191221	0.145247	0.099796	0.244823	-0.106478	-0.0339297	0.0413335	-0.313351	-0.0122387	-0.0894579	-0.416611	-0.129786	0.0643085	-0.46073	-0.0872024	0.151752	0.14665	-0.0743241	0.184739	-0.337118	0.529491	-0.274656	0.0689273	M4 yellow Complement/Coagulation|0.6209
ANGPTL3|Q9Y5C1	yellow	-0.123181	-0.485342	-0.44673	0.62078	-0.0771098	-0.209155	-0.231347	0.112828	0.186782	0.117042	-0.256962	0.320156	0.103348	-0.114928	-0.123962	-0.176358	0.357448	0.0434265	-0.0754087	-0.0352516	0.323533	-0.325724	0.0238027	-0.159086	-0.0261613	-0.0881474	0.0792428	-0.457649	0.478943	-0.213094	-0.156659	M4 yellow Complement/Coagulation|0.6208
HRG|P04196	yellow	-0.228617	-0.287439	0.0130797	0.618718	-0.175996	-0.0669465	0.235595	-0.25186	-0.111446	-0.251777	0.0680631	-0.0386682	0.0249898	0.292821	0.0231426	-0.256534	0.0858161	-0.427514	-0.224103	-0.210629	-0.00542664	-0.498214	-0.167672	-0.0604597	0.252153	0.0813578	0.00431871	-0.139784	0.232103	-0.20535	-0.144337	M4 yellow Complement/Coagulation|0.6187
PLG|P00747	yellow	0.239722	-0.607236	-0.653489	0.616959	0.00887858	0.114393	-0.4874	0.390117	-0.00144909	0.475705	-0.1457	0.595984	-0.185312	-0.280272	-0.222082	-0.353756	0.105502	0.116989	-0.394603	0.0764362	0.312173	-0.2947	-0.261706	0.174979	-0.0873599	-0.182374	0.086979	-0.503122	0.528227	-0.300174	-0.0251268	M4 yellow Complement/Coagulation|0.617
GPHB5|Q86YW7	yellow	-0.14239	-0.481186	-0.366794	0.614849	-0.154146	-0.230186	-0.254804	0.109006	0.202142	0.242536	-0.238736	0.436359	0.15412	-0.01953	-0.0233275	-0.104339	0.276969	-0.0648063	-0.103415	-0.10098	0.395405	-0.306226	-0.0438955	-0.127148	0.0553108	-0.0350526	0.013571	-0.302722	0.354479	-0.253331	-0.0756894	M4 yellow Complement/Coagulation|0.6148
LRIT3|Q3SXY7	yellow	-0.256474	-0.421909	-0.315271	0.611453	-0.290418	-0.310352	-0.146396	0.0542576	0.299012	0.166802	-0.280443	0.279137	0.207714	-0.137894	0.015273	-0.146443	0.171266	0.0331438	0.0264393	-0.150042	0.328469	-0.154818	-0.043612	-0.161959	0.0197916	-0.182974	0.022956	-0.241066	0.221123	-0.249963	-0.01967	M4 yellow Complement/Coagulation|0.6115
PRSS1|P07477	yellow	-0.135949	-0.438892	-0.258337	0.610514	-0.0779356	-0.197654	-0.0560567	0.0516961	0.0973994	0.0263476	-0.215841	0.20103	0.0779012	-0.0383283	-0.105492	-0.127408	0.232794	-0.0931365	-0.0485852	-0.07609	0.231977	-0.329495	-0.0409866	-0.128307	0.0510332	-0.03407	0.0473576	-0.312353	0.366248	-0.206863	-0.11287	M4 yellow Complement/Coagulation|0.6105
CTBS|Q01459	yellow	-0.22505	-0.424529	-0.341033	0.609212	-0.232506	-0.314612	-0.16457	-0.0823486	0.349521	-0.0133599	-0.420066	0.254326	0.129601	-0.0261837	-0.213596	-0.0656013	0.350319	-0.0462093	0.0526284	-0.0484058	0.299146	-0.2781	-0.0168497	-0.233045	0.0305984	-0.00878006	0.0303294	-0.24644	0.253162	-0.295909	-0.177637	M4 yellow Complement/Coagulation|0.6092
TCN1|P20061	yellow	0.0430683	-0.394725	-0.36927	0.603724	0.0246279	-0.129221	-0.168943	0.170526	0.203063	0.0356054	-0.288618	0.127249	-0.0759175	-0.193568	-0.18768	-0.141557	0.190778	0.158306	-0.070391	0.109229	0.128897	-0.161615	0.0229939	-0.102112	-0.10455	-0.254272	0.0477876	-0.23584	0.291039	-0.25705	0.0473371	M4 yellow Complement/Coagulation|0.6037
GP5|P40197	yellow	-0.170022	-0.261913	0.0293826	0.602857	-0.164058	-0.0711392	0.332793	-0.12091	-0.137271	-0.351795	0.0171681	-0.217726	-0.0546868	0.141565	-0.0731575	-0.309892	0.0279438	-0.390618	-0.165214	-0.230137	-0.161397	-0.398787	-0.201024	0.00857564	0.299369	0.0358889	0.218079	-0.0401982	0.229053	-0.189326	0.00921381	M4 yellow Complement/Coagulation|0.6029
LOC653486|P0DMR2	yellow	-0.138135	-0.551347	-0.427966	0.594021	-0.153313	-0.19045	-0.290154	0.0858132	0.180061	0.234191	-0.225228	0.455458	0.144794	-0.00953976	-0.0417922	-0.125142	0.282657	-0.0737358	-0.149524	-0.122602	0.389861	-0.367067	-0.0474625	-0.112509	0.0655115	0.00841818	0.0354075	-0.341214	0.386385	-0.268858	-0.0827698	M4 yellow Complement/Coagulation|0.594
MAP2K4|P45985	yellow	-0.399646	-0.238171	0.0781334	0.592041	-0.39487	-0.298898	0.29258	-0.414064	0.138522	-0.342999	-0.11334	-0.0161124	0.196384	0.283079	-0.0151717	-0.103879	0.0797415	-0.412196	0.0105214	-0.174927	0.132159	-0.421879	-0.188519	-0.197019	0.230821	0.117918	0.00569064	-0.0917458	0.0978934	-0.0770792	-0.207839	M4 yellow Complement/Coagulation|0.592
DAG1|Q14118	yellow	-0.180711	-0.230677	0.0174438	0.590768	-0.141711	-0.129649	0.213524	-0.295815	0.0497442	-0.072286	0.0427042	0.0515103	0.0255274	0.309028	-0.00730643	-0.112028	-0.157526	-0.311728	-0.19391	0.0345631	0.00700305	-0.277553	-0.135103	-0.00224106	0.0253217	-0.0114722	-0.193603	-0.16995	0.200773	-0.0380119	-0.193663	M4 yellow Complement/Coagulation|0.5908
LCP1|P13796	yellow	-0.38801	-0.262754	-0.035954	0.590454	-0.250667	-0.419917	0.299851	-0.195453	0.250286	-0.419402	-0.310706	-0.224596	0.179358	0.0243131	-0.092904	-0.151192	0.260379	-0.176064	0.200821	-0.196022	0.0566905	-0.279334	0.116406	-0.242131	0.218371	-0.0319107	0.2353	-0.0578776	0.173241	-0.268456	-0.105674	M4 yellow Complement/Coagulation|0.5905
CFHR1|Q03591	yellow	0.163414	-0.290225	-0.166854	0.587303	0.0684274	0.291891	0.0425278	0.162203	-0.351819	0.129922	0.265663	0.119673	-0.24342	0.138596	0.00715435	-0.484752	-0.189809	-0.22139	-0.516442	-0.0695451	-0.117734	-0.363145	-0.28564	0.242469	0.0674761	-0.0856986	-0.030781	-0.380565	0.500847	-0.206766	-0.152254	M4 yellow Complement/Coagulation|0.5873
PAPPA|Q13219	yellow	-0.0547608	-0.482253	-0.386977	0.585297	-0.060599	-0.153948	-0.162012	0.179616	0.102054	0.104217	-0.248389	0.244894	-0.0181928	-0.00868765	-0.127625	-0.287345	0.191592	-0.00560384	-0.176308	-0.0626009	0.211657	-0.325691	0.0177376	0.0115583	0.0127314	-0.0443136	0.101437	-0.418238	0.497208	-0.226084	-0.120755	M4 yellow Complement/Coagulation|0.5853
AMBN|Q9NP70	yellow	-0.125355	-0.53985	-0.459592	0.578797	-0.113779	-0.219857	-0.34352	0.123346	0.226595	0.250267	-0.276822	0.474426	0.159489	-0.0628459	-0.046412	-0.0965041	0.350083	-0.00923959	-0.109258	-0.0957676	0.429579	-0.336791	0.0160891	-0.143358	0.0502892	0.00809648	0.0511527	-0.344275	0.375446	-0.300516	-0.0776171	M4 yellow Complement/Coagulation|0.5788
CD5L|O43866	yellow	-0.097695	-0.422704	-0.389659	0.57537	-0.151464	-0.127994	-0.220024	0.199853	0.0937183	0.143316	-0.228501	0.256991	0.042673	-0.158121	-0.0439839	-0.230827	0.254782	0.0270657	-0.161316	-0.25441	0.244973	-0.276854	-0.0468063	-0.0702527	0.0634341	-0.0376593	0.115509	-0.28297	0.34984	-0.337409	0.00267852	M4 yellow Complement/Coagulation|0.5754
EVI2B|P34910	yellow	-0.388789	-0.196341	-0.0335477	0.573483	-0.364549	-0.33625	0.0164197	-0.201871	0.224602	-0.12012	-0.228026	0.14576	0.329903	0.0611004	0.0346433	-0.0665624	0.24262	-0.155391	0.152432	-0.246549	0.272028	-0.217081	-0.0571674	-0.297022	0.0177371	-0.00723394	-0.127739	-0.0899659	0.0678899	-0.284521	-0.187279	M4 yellow Complement/Coagulation|0.5735
CCL15|Q16663	yellow	-0.134058	-0.475399	-0.276448	0.570708	-0.103539	-0.1393	-0.0120308	0.0309495	0.0818247	-0.0539802	-0.1509	0.151909	0.0632323	0.204314	-0.0710971	-0.193446	0.24638	-0.188861	-0.162349	-0.110316	0.149939	-0.449421	-0.0254116	-0.0315848	0.0520652	0.00896854	0.0416853	-0.403666	0.531301	-0.254067	-0.220462	M4 yellow Complement/Coagulation|0.5707
IGFL4|Q6B9Z1	yellow	-0.0597205	-0.352034	-0.121723	0.569787	-0.0374626	0.174723	0.0806341	-0.0310382	-0.292227	0.0862542	0.331098	0.214529	-0.0462406	0.243097	0.194726	-0.271465	-0.19426	-0.386719	-0.47581	-0.185576	-0.00569251	-0.46032	-0.226798	0.163436	0.162729	0.00153838	-0.060886	-0.298573	0.361925	-0.120356	-0.118347	M4 yellow Complement/Coagulation|0.5698
IGFBP6|P24592	yellow	-0.370753	-0.396497	-0.157912	0.569486	-0.26889	-0.353042	0.105905	-0.218421	0.261036	-0.247795	-0.302976	0.100051	0.252436	0.218131	-0.0327293	-0.00622925	0.320467	-0.159666	0.111755	-0.188671	0.254411	-0.422817	0.130608	-0.24985	0.0805669	0.118865	0.0075361	-0.310692	0.373617	-0.256131	-0.32399	M4 yellow Complement/Coagulation|0.5695
MST1|P26927	yellow	-0.127258	-0.30497	-0.233637	0.564816	-0.109035	-0.192084	-0.194794	0.0403664	0.190633	0.116911	-0.217863	0.252127	0.135094	-0.091636	0.00820541	-0.147794	0.139327	0.0368026	-0.0401584	-0.0858487	0.282972	-0.185227	0.054358	-0.152855	-0.0536762	-0.149365	-0.0699451	-0.184825	0.213552	-0.209491	-0.0293718	M4 yellow Complement/Coagulation|0.5648
IL19|Q9UHD0	yellow	-0.515688	-0.346079	-0.198853	0.564565	-0.373233	-0.552779	-0.01391	-0.242311	0.449394	-0.24084	-0.481019	0.108614	0.357778	0.0485162	-0.0880788	-0.0501095	0.516662	-0.0945362	0.251658	-0.214873	0.356299	-0.324316	0.0981434	-0.437398	0.0909981	0.0758142	0.0297237	-0.131699	0.163061	-0.330418	-0.144564	M4 yellow Complement/Coagulation|0.5646
C4BPA|P04003	yellow	-0.0755384	-0.338642	-0.144325	0.564369	-0.0838723	0.157888	0.0698609	0.0866951	-0.296748	0.0406469	0.232539	0.146393	-0.00868864	0.044737	0.24979	-0.461073	-0.117732	-0.229707	-0.372438	-0.365723	0.0438585	-0.384468	-0.148873	0.0847243	0.205068	-0.0341779	0.0788158	-0.241447	0.292314	-0.197096	0.00745813	M4 yellow Complement/Coagulation|0.5644
IGFBP3|P17936	yellow	-0.281164	-0.478054	-0.353444	0.55537	-0.193112	-0.247397	-0.171615	0.0928515	0.171885	-0.0221859	-0.342016	0.272845	0.343941	-0.0708941	0.08459	-0.0604363	0.498174	0.149802	0.182595	-0.346359	0.422399	-0.334936	0.190964	-0.348706	-0.0144785	-0.055066	0.0845243	-0.340829	0.481093	-0.35913	-0.149556	M4 yellow Complement/Coagulation|0.5554
KNG1|P01042	yellow	-0.0162966	-0.331715	-0.243106	0.554984	0.00952409	-0.00147361	-0.105375	0.117404	-0.0508708	0.0395077	-0.102631	0.102393	-0.0694871	0.0236496	-0.0428753	-0.247929	0.195382	-0.0623549	-0.240097	-0.168288	0.0592431	-0.328917	0.00829318	-0.0722051	0.0784351	0.0223253	0.0370204	-0.248137	0.330667	-0.313937	-0.077404	M4 yellow Complement/Coagulation|0.555
C10orf10|Q9NTK1	yellow	-0.179823	-0.336685	-0.113249	0.553114	-0.0296879	-0.194527	0.129589	-0.125911	0.0715897	-0.292153	-0.196581	-0.0273168	0.0126955	0.228843	-0.177523	-0.24979	0.374478	-0.312721	-0.0786144	-0.0483921	0.0809344	-0.472474	0.0801378	-0.146851	0.240429	0.110441	0.118002	-0.168732	0.306699	-0.304445	-0.129323	M4 yellow Complement/Coagulation|0.5531
FNDC5|Q8NAU1	yellow	0.208983	-0.337043	-0.415872	0.549863	0.0343795	0.0670553	-0.331571	0.392051	0.0397499	0.426016	-0.0885134	0.342653	-0.136416	-0.384245	-0.0884344	-0.277413	-0.0769083	0.239998	-0.198978	0.125487	0.182551	0.0465656	-0.206988	0.0734486	-0.22586	-0.421456	-0.0438132	-0.276982	0.267243	-0.129254	0.108409	M4 yellow Complement/Coagulation|0.5499
MED1|Q15648	yellow	-0.496336	-0.251157	-0.0637292	0.549901	-0.243239	-0.270188	0.0269543	-0.191786	0.0527686	-0.279343	-0.0988329	0.116995	0.52812	0.0504258	0.296395	0.00581153	0.409088	-0.0682374	0.228991	-0.48085	0.347966	-0.354995	0.245306	-0.463732	0.0113988	-0.0144811	-0.035671	-0.2068	0.280836	-0.238395	-0.221347	M4 yellow Complement/Coagulation|0.5499
IGHM|P01871	yellow	-0.220207	-0.384623	-0.278972	0.546048	-0.032558	-0.259375	-0.069276	-0.094945	0.17651	-0.0441865	-0.188318	0.150088	0.092662	-0.0353888	-0.0989511	-0.130649	0.268053	-0.072734	-0.0720272	-0.0443745	0.182983	-0.319324	0.123609	-0.168332	0.0626397	0.0329301	0.0700712	-0.29245	0.236745	-0.332833	-0.170131	M4 yellow Complement/Coagulation|0.546
TNFAIP8|O95379	yellow	-0.463506	-0.392988	-0.170468	0.545761	-0.347555	-0.261054	0.0572384	-0.13097	0.0626098	-0.0521553	-0.0662628	0.289138	0.433624	0.0100257	0.283278	-0.198804	0.171349	-0.153203	0.0495514	-0.42514	0.398333	-0.387305	0.00600402	-0.233651	0.153129	0.0319362	0.120852	-0.369809	0.285394	-0.302467	-0.24329	M4 yellow Complement/Coagulation|0.5458
ISM2|Q6H9L7	yellow	-0.125048	-0.545792	-0.485483	0.545439	-0.114289	-0.254324	-0.351904	0.136729	0.266425	0.272079	-0.30951	0.478904	0.13678	-0.0867151	-0.0817843	-0.081304	0.337602	-0.00507349	-0.111716	-0.0675184	0.426503	-0.313853	0.0152838	-0.115204	0.0738976	0.0221147	0.0795647	-0.353729	0.372037	-0.287039	-0.0614093	M4 yellow Complement/Coagulation|0.5454
SELL|P14151	yellow	-0.000372467	-0.405008	-0.495734	0.545022	-0.0619961	-0.170815	-0.458741	0.289267	0.250439	0.181918	-0.437237	0.325823	0.0830683	-0.375054	-0.141351	-0.0975052	0.448206	0.293516	0.0449139	-0.072085	0.367546	-0.106092	0.123728	-0.228984	-0.13992	-0.184017	0.0814854	-0.228769	0.285735	-0.340303	0.0309655	M4 yellow Complement/Coagulation|0.545
SCGB3A1|Q96QR1	yellow	-0.154475	-0.220434	0.0123823	0.540491	-0.155485	-0.1277	0.255816	-0.202621	-0.00148557	-0.248696	-0.0445339	-0.0516378	0.0327296	0.234907	-0.04284	-0.0489835	-0.0127532	-0.325085	-0.11326	-0.0789363	-0.00734129	-0.354002	-0.137922	-0.0810415	0.168324	0.064054	0.0325302	-0.140296	0.194422	-0.045257	-0.18055	M4 yellow Complement/Coagulation|0.5405
REG1A|P05451	yellow	-0.173092	-0.205645	-0.0207199	0.53041	-0.0355628	0.0403104	0.0615627	-0.0241666	-0.229542	-0.0203655	0.195553	0.0662594	0.137157	0.122314	0.255988	-0.198476	0.0454654	-0.247601	-0.252644	-0.273767	0.0418508	-0.351161	-0.0509908	-0.0988068	0.0899333	-0.0238997	-0.0779258	-0.195502	0.246285	-0.129719	-0.10867	M4 yellow Complement/Coagulation|0.5304
IGFL1|Q6UW32	yellow	-0.292242	-0.471944	-0.371504	0.527371	-0.280936	-0.481175	-0.242633	-0.082345	0.513624	0.0685224	-0.511445	0.384751	0.223408	-0.0184875	-0.200442	0.018475	0.424173	-0.0307409	0.105335	-0.00782818	0.47358	-0.298478	0.074046	-0.253294	0.0628332	0.110231	0.0455323	-0.25172	0.233039	-0.234849	-0.138378	M4 yellow Complement/Coagulation|0.5274
VNN2|O95498	yellow	-0.166262	-0.247661	-0.211152	0.526738	0.00649563	-0.0586106	-0.025674	-0.127843	0.0248111	-0.234899	-0.0649362	-0.00249193	0.0391875	0.0218839	-0.0023257	-0.0152189	0.238527	-0.0937864	-0.103457	-0.096777	0.0239476	-0.346373	0.118764	-0.191231	0.0150234	-0.0658271	-0.00699321	-0.217173	0.264854	-0.175237	-0.197023	M4 yellow Complement/Coagulation|0.5267
GHR|P10912	yellow	-0.370448	-0.235887	-0.143532	0.520001	-0.335085	-0.378175	-0.00603984	-0.214532	0.311422	-0.19161	-0.333491	0.10962	0.235527	-0.0243933	-0.0707715	-0.0069811	0.295414	-0.0642854	0.179531	-0.185614	0.270401	-0.253032	0.0145015	-0.336136	-0.0123197	0.0319948	-0.0327695	-0.103014	0.0882334	-0.378544	-0.124378	M4 yellow Complement/Coagulation|0.52
CDH5|P33151	yellow	-0.109019	-0.142746	-0.188801	0.516168	-0.112429	-0.183557	-0.120561	0.12394	0.164998	-0.203364	-0.379836	-0.0285742	0.158088	-0.249461	-0.0980848	0.0371854	0.421928	0.21962	0.302578	-0.156546	0.156246	-0.0314195	0.142194	-0.336805	-0.111904	-0.213853	0.0695724	-0.0438243	0.196011	-0.29006	-0.0367053	M4 yellow Complement/Coagulation|0.5162
SPINK7|P58062	yellow	-0.0374095	-0.115664	-0.0800247	0.513448	0.0933845	-0.0773884	-0.0920287	-0.0231001	0.129348	-0.0522527	-0.130804	-0.00892206	0.0143457	-0.0590659	-0.0803891	-0.0757238	0.183705	0.0777808	0.00504084	0.0876872	0.039787	-0.0582538	0.106358	-0.241184	-0.2097	-0.264182	-0.182955	-0.0984775	0.087712	-0.030697	-0.0700067	M4 yellow Complement/Coagulation|0.5134
APOB|P04114	yellow	-0.0329416	-0.404852	-0.257995	0.51122	-0.174061	0.0397479	-0.0183716	0.127912	-0.053949	0.155212	0.0115533	0.21936	-0.0366627	0.00349562	0.103412	-0.29671	-0.0950717	-0.107904	-0.29199	-0.214841	0.130179	-0.275914	-0.153859	0.0954177	0.11474	-0.0573697	0.103781	-0.258234	0.30473	-0.0972873	0.0463656	M4 yellow Complement/Coagulation|0.5112
COL15A1|P39059	yellow	-0.120363	-0.555695	-0.448262	0.509367	-0.140587	-0.219532	-0.128337	0.112599	0.178063	0.125739	-0.246711	0.366035	0.101913	-0.0299162	-0.0627766	-0.0699523	0.250861	-0.00189855	-0.110071	-0.0704809	0.366141	-0.344997	0.0288502	0.0272125	0.0577109	0.0178055	0.143811	-0.56652	0.545315	-0.214453	-0.245431	M4 yellow Complement/Coagulation|0.5094
LY9|Q9HBG7	yellow	-0.165789	-0.244159	-0.0980858	0.50873	-0.302468	-0.150118	0.0257263	0.00676941	0.118399	0.113273	-0.0521258	0.164261	0.124544	-0.0372338	0.0944286	-0.179778	-0.173071	-0.0365928	-0.0351699	-0.1239	0.140202	-0.0716047	-0.209008	-0.00193204	-0.0589371	-0.157453	-0.0779917	-0.179953	0.1437	-0.064356	-0.0536527	M4 yellow Complement/Coagulation|0.5087
SELE|P16581	yellow	-0.0820913	-0.299362	-0.328345	0.508198	-0.0700362	-0.159821	-0.14755	0.0195137	0.211717	-0.000706564	-0.245224	0.156644	-0.0558591	-0.0580427	-0.179906	-0.156163	0.172343	0.0215148	-0.118982	0.0405073	0.122933	-0.210208	0.00497059	-0.0869465	-0.0215097	-0.0775736	0.0252832	-0.243779	0.232923	-0.260948	-0.105187	M4 yellow Complement/Coagulation|0.5082
FLNA|P21333	yellow	-0.0313802	-0.367196	-0.364182	0.505092	-0.135859	-0.112393	-0.267598	0.297945	0.155062	0.269793	-0.23355	0.370307	0.140444	-0.17269	0.027678	-0.170229	0.176807	0.131206	-0.0555939	-0.123295	0.355021	-0.126239	-0.0397687	-0.0824616	-0.0312068	-0.175346	0.0814114	-0.291052	0.356867	-0.176272	-0.0226761	M4 yellow Complement/Coagulation|0.5051
ATP1A1|P05023	yellow	0.267375	-0.378471	-0.510179	0.503596	0.0720047	0.0259976	-0.41809	0.49954	0.103584	0.399783	-0.237772	0.352034	-0.161244	-0.390982	-0.185725	-0.155022	0.164642	0.296438	-0.136272	0.125096	0.219264	0.0723359	-0.0736931	0.105642	-0.168495	-0.369831	0.0951386	-0.281042	0.339751	-0.214517	0.144448	M4 yellow Complement/Coagulation|0.5036
TCN2|P20062	yellow	-0.296652	-0.350301	-0.0690189	0.501971	-0.281708	-0.313684	0.249254	-0.125016	0.131731	-0.206236	-0.173675	0.0322967	0.172725	0.295349	-0.0668558	-0.164763	0.146641	-0.36147	0.0154719	-0.157062	0.147336	-0.413665	-0.0601082	-0.0295202	0.280414	0.130299	0.178301	-0.321926	0.408682	-0.166889	-0.345712	M4 yellow Complement/Coagulation|0.502
CA6|P23280	yellow	-0.189214	-0.285095	-0.265335	0.493036	-0.185028	-0.22003	-0.150656	0.0343761	0.227828	-0.116144	-0.352304	0.0994672	0.19377	-0.195193	-0.0652421	-0.0655047	0.35332	0.118969	0.183237	-0.155677	0.245992	-0.158393	0.0642062	-0.282887	-0.0217718	-0.0706974	0.107401	-0.0287005	0.163411	-0.329123	0.0159459	M4 yellow Complement/Coagulation|0.493
SERPINA1|P01009	yellow	-0.0426679	-0.380207	-0.297618	0.492551	0.199855	0.149629	-0.149839	0.189613	-0.288271	0.0704659	0.168262	0.189584	0.0889816	-0.105784	0.264469	-0.278349	0.21163	0.0229229	-0.261942	-0.300687	0.156383	-0.384555	0.227453	-0.0856957	0.0371417	-0.110413	0.0898819	-0.290009	0.388676	-0.30477	-0.0107767	M4 yellow Complement/Coagulation|0.4926
MUSK|O15146	yellow	-0.310588	-0.405474	-0.122832	0.48706	-0.502147	-0.427341	0.0498141	-0.131858	0.273115	0.00136104	-0.314561	0.356618	0.262436	0.260299	-0.0898878	-0.0501878	0.21202	-0.292383	0.0669447	-0.185184	0.465801	-0.373639	-0.236536	-0.0619803	0.0981461	0.145441	-0.0188376	-0.222813	0.337325	-0.162753	-0.15097	M4 yellow Complement/Coagulation|0.4871
BPIFB1|Q8TDL5	yellow	-0.0764185	-0.233567	-0.00162119	0.482903	-0.200931	-0.0677957	0.310548	-0.0408193	-0.0925196	-0.160866	-0.00703006	-0.0800518	-0.0455365	0.206732	-0.058097	-0.238635	-0.0914422	-0.311366	-0.16499	-0.124017	-0.0866136	-0.284187	-0.252361	0.159315	0.274192	0.0685043	0.200693	-0.145835	0.262729	-0.123506	-0.127308	M4 yellow Complement/Coagulation|0.4829
IGHA1|P01876	yellow	0.020828	-0.270385	-0.226555	0.482374	-0.0587954	-0.0584626	-0.186804	0.168324	0.0392895	0.172786	-0.0950072	0.196229	-0.00404617	-0.0791398	-0.0183762	-0.0753485	0.0706985	0.035929	-0.165673	-0.0755263	0.133407	-0.124636	-0.027597	-0.0143728	-0.0750746	-0.0767905	-0.0409944	-0.26085	0.268883	-0.188243	-0.0641776	M4 yellow Complement/Coagulation|0.4824
PIGR|P01833	yellow	0.0219819	-0.267495	-0.224644	0.482177	-0.0558408	-0.056121	-0.185855	0.166617	0.0368528	0.172164	-0.0913851	0.194016	-0.00486496	-0.0803889	-0.0194505	-0.0754206	0.0686893	0.0352369	-0.16514	-0.0721519	0.13004	-0.1228	-0.0282617	-0.0145037	-0.076976	-0.0804272	-0.0434713	-0.259899	0.266989	-0.186901	-0.0656964	M4 yellow Complement/Coagulation|0.4822
IGHA2|P01877	yellow	0.0215708	-0.26874	-0.225724	0.482136	-0.0569142	-0.0571181	-0.186428	0.167331	0.03803	0.172444	-0.0931155	0.194932	-0.00455468	-0.0801028	-0.0191062	-0.075089	0.0694516	0.0361251	-0.165368	-0.0734716	0.131482	-0.123278	-0.0276465	-0.0144762	-0.0765431	-0.0786457	-0.0423356	-0.260682	0.267764	-0.18748	-0.0653008	M4 yellow Complement/Coagulation|0.4821
PRSS2|P07478	yellow	0.0320739	-0.216248	-0.175472	0.481769	0.0907663	0.0132175	-0.0367203	0.0152536	-0.0201287	-0.0410676	-0.0700822	0.0449658	-0.123171	-0.0314934	-0.128661	-0.160514	0.0835668	-0.0541218	-0.163857	0.0580089	-0.01198	-0.171721	-0.0321922	-0.0847559	-0.0717334	-0.0696988	-0.048368	-0.216021	0.217928	-0.245956	-0.0852019	M4 yellow Complement/Coagulation|0.4818
IGJ|P01591	yellow	0.0218545	-0.269541	-0.226798	0.481747	-0.0573429	-0.0577777	-0.186669	0.167921	0.0393901	0.172593	-0.094937	0.195545	-0.00518884	-0.07935	-0.0186053	-0.0742459	0.0694678	0.0371924	-0.16638	-0.0743815	0.132622	-0.123215	-0.0262126	-0.0137894	-0.0761143	-0.0759303	-0.04124	-0.261697	0.268233	-0.187352	-0.0651952	M4 yellow Complement/Coagulation|0.4817
APOL1|O14791	yellow	-0.194434	-0.240531	-0.227877	0.474682	-0.317744	-0.275837	-0.205921	-0.0424395	0.348437	0.0489128	-0.298323	0.345692	0.205655	-0.218426	-0.0162403	-0.00188565	0.191199	0.0823259	0.126505	-0.0694377	0.428806	-0.0723368	-0.038842	-0.209999	-0.122811	-0.161241	-0.057719	0.0660659	-0.00662163	-0.0247097	0.160747	M4 yellow Complement/Coagulation|0.4747
RNF165|Q6ZSG1	yellow	0.227655	-0.439776	-0.48086	0.474493	0.0887299	0.067198	-0.421424	0.410709	0.0541766	0.464001	-0.162829	0.44682	-0.129185	-0.18768	-0.142332	-0.249945	0.117708	0.147331	-0.275431	0.0902077	0.237392	-0.162846	-0.103992	0.0995508	-0.038142	-0.172603	0.0699985	-0.376976	0.40406	-0.203865	-0.0135065	M4 yellow Complement/Coagulation|0.4745
PRB4|P10163	yellow	0.185611	-0.312721	-0.214692	0.474294	0.0414876	0.233764	-0.0947284	0.282047	-0.191133	0.308462	0.190657	0.225893	-0.197993	-0.0222996	0.06515	-0.337572	-0.206912	-0.0955257	-0.429143	-0.00536893	-0.00240615	-0.156866	-0.248497	0.212312	0.016667	-0.211525	-0.0384552	-0.201495	0.325762	-0.0323291	0.121333	M4 yellow Complement/Coagulation|0.4743
IL13RA1|P78552	yellow	-0.37783	-0.326979	-0.070003	0.472484	-0.326769	-0.114978	0.146967	-0.182901	-0.0285282	-0.0650334	0.0875069	0.12198	0.273306	0.18749	0.324029	-0.176533	-0.075441	-0.220678	-0.109755	-0.42041	0.14246	-0.37215	-0.194674	-0.104734	0.0856253	0.0698676	-0.0992522	-0.160792	0.217439	-0.195496	-0.0746954	M4 yellow Complement/Coagulation|0.4725
FCRL1|Q96LA6	yellow	-0.00442401	-0.271863	-0.264478	0.470245	0.0392562	-0.167773	-0.115681	0.0693689	0.224485	-0.0178358	-0.325434	0.0377164	-0.122544	-0.0606714	-0.28072	-0.221516	0.263653	0.0091279	-0.0299807	0.159503	0.0482078	-0.125475	0.0962961	-0.107643	-0.0451386	-0.122808	0.0678678	-0.13308	0.215011	-0.115325	-0.00584447	M4 yellow Complement/Coagulation|0.4702
H6PD|O95479	yellow	-0.420481	-0.166794	0.118456	0.467767	-0.31522	-0.325421	0.274387	-0.202679	0.0948375	-0.312171	-0.077311	-0.0640828	0.343722	0.105373	0.203344	-0.0377528	0.122115	-0.196535	0.178238	-0.326246	0.16671	-0.261794	0.0302673	-0.23061	0.13081	0.0344683	0.0306879	-0.00383008	0.104839	-0.16572	-0.0524757	M4 yellow Complement/Coagulation|0.4678
GP6|Q9HCN6	yellow	-0.046884	-0.261431	-0.225526	0.465784	-0.100531	-0.127327	-0.0324456	0.104803	0.0857199	-0.106063	-0.272378	-0.0106536	-0.0780904	-0.0665652	-0.285757	-0.264343	0.31945	-0.0755039	-0.010763	-0.0587289	0.0305759	-0.193917	-0.144118	-0.0671811	0.0694645	-0.0879577	0.182197	-0.181053	0.25292	-0.341302	-0.0865011	M4 yellow Complement/Coagulation|0.4658
TNFRSF17|Q02223	yellow	0.0339919	-0.325853	-0.168798	0.464338	0.0526072	-0.0482953	0.0162706	0.0853789	0.0191113	0.00920739	-0.0730397	0.0936885	-0.0874114	0.205532	-0.149863	-0.134203	0.121539	-0.136054	-0.148974	0.0267773	0.0390585	-0.309826	0.0027539	0.0409047	0.0688064	0.0321433	0.0275941	-0.285929	0.443681	-0.135026	-0.158795	M4 yellow Complement/Coagulation|0.4643
COL28A1|Q2UY09	yellow	-0.121628	-0.282181	-0.216423	0.454964	0.0780124	0.0430382	-0.0175368	0.0605236	-0.152898	-0.136951	0.0616114	0.0791827	0.161473	-0.0311616	0.213422	-0.0587429	0.25663	0.0516823	-0.0510874	-0.275903	0.113109	-0.301554	0.22401	-0.175837	-0.0230141	-0.0726717	0.0476182	-0.484639	0.456209	-0.253915	-0.341202	M4 yellow Complement/Coagulation|0.455
ENPP7|Q6UWV6	yellow	-0.11944	-0.187539	-0.105521	0.454989	-0.198433	-0.1496	0.0952642	9.04e-05	0.126046	-0.0214719	-0.136012	0.0329591	0.00657134	-0.0349062	-0.0744397	-0.28338	-0.0340644	-0.0913217	-0.0735444	-0.0850851	0.0549174	-0.106365	-0.157368	0.0072366	0.101107	0.0388099	0.120125	-0.163694	0.149576	-0.181957	-0.0850467	M4 yellow Complement/Coagulation|0.455
HPGDS|O60760	yellow	-0.47005	-0.253541	0.0704594	0.453619	-0.448765	-0.31219	0.300932	-0.184376	-0.00125265	-0.361359	-0.0845717	0.00829551	0.351752	0.323774	0.142169	-0.102008	0.345264	-0.420973	0.110706	-0.491109	0.24589	-0.512081	-0.0823578	-0.160758	0.34762	0.253953	0.148427	-0.160739	0.358028	-0.236666	-0.197687	M4 yellow Complement/Coagulation|0.4536
CCL14|Q16627	yellow	-0.302755	-0.281561	-0.120761	0.452508	-0.110266	-0.201163	0.0119493	-0.0436691	0.0354559	-0.0941926	-0.0953512	0.131672	0.312736	0.102616	0.181389	0.0235426	0.332694	-0.054603	0.0595825	-0.258688	0.274478	-0.30908	0.194563	-0.27007	0.0328282	-0.0806007	-0.0212751	-0.216937	0.362865	-0.142584	-0.125777	M4 yellow Complement/Coagulation|0.4525
ELANE|P08246	yellow	-0.21294	-0.4712	-0.306387	0.44876	-0.136536	-0.171043	-0.0984869	0.132778	0.035799	0.0655505	-0.1356	0.176671	0.158579	-0.0783346	0.0915686	-0.3287	0.283264	-0.0416656	-0.152019	-0.332595	0.232519	-0.426702	0.0245398	-0.0976434	0.242513	0.0324044	0.233696	-0.2569	0.345267	-0.307421	0.0610737	M4 yellow Complement/Coagulation|0.4488
GUCA2B|Q16661	yellow	-0.235061	-0.214876	-0.014042	0.448576	-0.119399	-0.179813	0.189033	-0.278556	0.07777	-0.409708	-0.158821	-0.147276	0.01733	0.245389	-0.203886	-0.141049	0.261996	-0.318765	0.000745628	-0.0782652	-0.025939	-0.364962	-0.0397465	-0.212516	0.103007	0.146179	0.0275835	-0.124214	0.190405	-0.175421	-0.212597	M4 yellow Complement/Coagulation|0.4486
ARRDC3|Q96B67	yellow	0.281276	-0.3074	-0.370214	0.447749	0.0939503	0.222675	-0.164476	0.184451	-0.0845899	0.145627	0.00203884	0.134992	-0.322225	-0.0756635	-0.223634	-0.24299	-0.12586	0.0209382	-0.368842	0.172751	-0.106275	-0.125439	-0.243564	0.233608	-0.106131	-0.16353	-0.0224461	-0.263827	0.355702	-0.160456	-0.0366068	M4 yellow Complement/Coagulation|0.4477
BAGE3|Q86Y29	yellow	-0.204659	-0.0781139	0.150421	0.447338	-0.0497639	0.25476	0.209844	-0.172517	-0.467566	-0.162193	0.460949	-0.0243375	0.156695	0.296943	0.435185	-0.193028	-0.107655	-0.349492	-0.263767	-0.448774	-0.0906616	-0.417957	-0.0733819	-0.100115	0.0998891	-0.0426751	-0.209725	-0.102511	0.214826	-0.174844	-0.155208	M4 yellow Complement/Coagulation|0.4473
TFF2|Q03403	yellow	0.0780618	-0.256305	-0.241177	0.446084	0.154939	0.0432953	-0.0674609	0.167282	-0.0637348	0.0572833	-0.0343474	0.0704539	-0.0797836	-0.0525168	-0.058579	-0.164534	0.123917	-0.000944692	-0.207131	0.0267631	0.0159365	-0.183435	0.0200081	0.0249833	0.0344242	0.00850323	0.0838226	-0.294426	0.34718	-0.0717326	-0.112713	M4 yellow Complement/Coagulation|0.4461
SERPING1|P05155	yellow	-0.0356859	-0.347058	-0.292024	0.441402	-0.126307	-0.170488	-0.185398	0.0873572	0.276527	0.259238	-0.203378	0.367782	0.0644914	-0.0770613	-0.0718233	-0.0424226	0.0235119	0.109905	-0.0256959	0.110729	0.301919	-0.10159	-0.0547844	-0.0148069	-0.193745	-0.169972	-0.171019	-0.338492	0.258349	-0.093439	-0.129882	M4 yellow Complement/Coagulation|0.4414
OMD|Q99983	yellow	-0.322213	-0.289922	0.0766505	0.440988	-0.251031	-0.302386	0.315963	-0.279878	0.132695	-0.290107	-0.109944	-0.0532727	0.179083	0.351263	-0.00665097	-0.0103446	0.0938434	-0.33116	0.0501938	-0.0994073	0.0970123	-0.373454	-0.0368508	-0.107981	0.10437	0.0223038	-0.0491709	0.0228889	0.21933	-0.0371158	0.0151919	M4 yellow Complement/Coagulation|0.441
REG3G|Q6UW15	yellow	-0.143718	-0.211973	-0.242541	0.436312	-0.0712247	-0.260245	-0.205483	0.0963169	0.299001	0.0663691	-0.307194	0.194264	0.225413	-0.281193	0.0442783	0.147242	0.292978	0.261082	0.196224	-0.0207194	0.329465	0.00714652	0.213644	-0.277831	-0.196103	-0.187423	-0.0550671	-0.183091	0.166432	-0.0711958	-0.03442	M4 yellow Complement/Coagulation|0.4363
TMIE|Q8NEW7	yellow	-0.0381413	-0.0708151	-0.089879	0.43534	-0.25319	-0.155792	-0.0664019	-0.0181485	0.173651	0.131707	-0.11362	0.217705	0.0584767	-0.0855962	-0.032167	0.209083	-0.0805596	0.0134124	0.0360611	0.0465565	0.186017	0.0939846	-0.232179	-0.00745666	-0.182664	-0.184047	-0.191808	-0.124131	0.052729	0.0565481	-0.10117	M4 yellow Complement/Coagulation|0.4353
ZNF334|Q9HCZ1	yellow	0.252382	-0.159665	-0.15997	0.435045	0.143336	0.354856	0.0111328	0.265989	-0.358012	0.0918376	0.266746	0.0161824	-0.248064	-0.0721087	0.0472204	-0.428698	-0.201913	-0.0503059	-0.388184	-0.062585	-0.187931	-0.170171	-0.219428	0.232793	0.028761	-0.200368	0.0857724	-0.221982	0.290359	-0.0711324	-0.0322493	M4 yellow Complement/Coagulation|0.435
IL1RAP|Q9NPH3	yellow	-0.0996388	-0.0582583	0.0709547	0.427078	-0.18833	-0.210735	0.0431291	0.0128337	0.11226	-0.0797508	-0.218416	-0.0474116	0.0891996	0.0374143	-0.10286	-0.0132586	0.154122	-0.106128	0.123549	-0.0579462	0.067637	-0.0687208	-0.129058	-0.172058	-0.00188945	-0.0987087	-0.0583192	0.137865	0.071828	-0.204848	0.0408163	M4 yellow Complement/Coagulation|0.4271
SPINT1|O43278	yellow	-0.150769	-0.121558	-0.0521546	0.418857	-0.10599	-0.147196	-0.0852085	0.0212847	0.14497	-0.166945	-0.254995	-0.0366777	0.20502	-0.111556	0.0485918	0.072466	0.280024	0.202251	0.260431	-0.17651	0.149806	-0.0380795	0.131548	-0.39885	-0.147395	-0.171447	-0.0548358	0.0198376	0.0970661	-0.249787	0.0397704	M4 yellow Complement/Coagulation|0.4189
KDR|P35968	yellow	-0.0458329	-0.336711	-0.291699	0.41875	-0.0170886	-0.0904703	-0.0327283	0.0305223	0.117218	-0.0856972	-0.176386	0.0827964	0.0271301	-0.0273467	-0.0982753	-0.118226	0.144253	0.0519294	0.0156261	0.0357218	0.100631	-0.174785	0.0751223	-0.0534971	-0.088033	-0.106718	0.0666196	-0.357191	0.39179	-0.167272	-0.274693	M4 yellow Complement/Coagulation|0.4188
B3GNT8|Q7Z7M8	yellow	-0.317027	-0.165012	0.126079	0.417903	-0.318413	-0.290669	0.332621	-0.132296	0.0659746	-0.297823	-0.16913	-0.192508	0.213441	0.221189	0.00232965	-0.114345	0.1815	-0.265294	0.160441	-0.274725	-0.00523814	-0.212157	-0.111191	-0.117531	0.292693	0.0691636	0.157283	0.0673689	0.148318	-0.217877	-0.013321	M4 yellow Complement/Coagulation|0.4179
GSN|P06396	yellow	-0.469724	-0.0512775	0.241081	0.415648	-0.391642	-0.491182	0.390992	-0.374516	0.276554	-0.417493	-0.251216	-0.162426	0.341358	0.32297	0.0173642	0.186092	0.192371	-0.251468	0.331321	-0.173129	0.14022	-0.19176	0.0296472	-0.326146	0.103033	0.112703	-0.0744713	-0.0304654	0.0409398	-0.0789664	-0.302962	M4 yellow Complement/Coagulation|0.4156
AGR3|Q8TD06	yellow	-0.24958	-0.0366609	0.0765049	0.409715	-0.144833	-0.335359	0.0499768	-0.225308	0.313053	-0.174972	-0.275119	-0.0845522	0.1442	0.172721	-0.103723	-0.022661	0.23621	-0.108885	0.134335	0.0264439	0.0910239	-0.0885947	0.0842262	-0.263286	-0.0644435	-0.0211286	-0.220803	0.0207051	0.0236135	-0.0667518	-0.0969876	M4 yellow Complement/Coagulation|0.4097
SET|Q01105	yellow	-0.244958	-0.0965901	0.200227	0.402419	-0.2859	0.0809405	0.326133	-0.185814	-0.282348	-0.233306	0.272688	-0.0955749	0.180944	0.405557	0.298843	-0.169276	-0.119514	-0.40613	-0.123484	-0.464427	-0.0503716	-0.391531	-0.24425	-0.021767	0.180443	0.0676481	-0.127734	-0.0979195	0.229445	-0.045512	-0.177446	M4 yellow Complement/Coagulation|0.4024
ELMO1|Q92556	yellow	-0.206611	-0.298573	-0.2267	0.401381	-0.252225	-0.313158	-0.0412126	-0.125861	0.338857	-0.0356588	-0.394554	0.130266	0.0984403	-0.0514607	-0.14625	-0.0544823	0.127297	-0.0254555	0.118933	-0.031385	0.233477	-0.112983	-0.0448928	-0.17183	0.102843	0.0200122	0.14782	-0.149851	0.0540326	-0.183575	-0.166505	M4 yellow Complement/Coagulation|0.4014
PROS1|P07225	yellow	0.0163459	-0.111077	0.121258	0.396521	-0.00317191	0.240806	0.312071	-0.0435078	-0.402151	-0.162461	0.305681	-0.22058	-0.16317	0.331597	0.052039	-0.342922	-0.173535	-0.389949	-0.353393	-0.185724	-0.33667	-0.357245	-0.22248	0.142007	0.236034	0.0574543	0.0235649	-0.113138	0.302595	-0.215473	-0.142598	M4 yellow Complement/Coagulation|0.3965
SGCB|Q16585	yellow	0.0220693	-0.247052	-0.371708	0.394928	0.179624	-0.0733188	-0.364469	0.117018	0.261971	0.167349	-0.267947	0.246219	0.0315186	-0.235063	-0.0666726	-0.00127353	0.320515	0.271863	-0.0015514	0.110931	0.2251	-0.0432127	0.305583	-0.246781	-0.199849	-0.21164	-0.0738961	-0.165454	0.157354	-0.0681017	-0.0435894	M4 yellow Complement/Coagulation|0.3949
CFHR5|Q9BXR6	yellow	-0.0635609	-0.291242	-0.118827	0.393724	0.0956145	-0.0317885	0.159699	-0.182531	0.00440725	-0.354131	-0.107645	-0.157651	-0.188889	0.350965	-0.254577	-0.29401	0.22043	-0.31895	-0.240065	-0.00297333	-0.140009	-0.513708	0.110003	-0.03498	0.20293	0.177598	0.0674069	-0.205944	0.316142	-0.275691	-0.212588	M4 yellow Complement/Coagulation|0.3937
MCFD2|Q8NI22	yellow	-0.165969	-0.181599	-0.0764112	0.392349	-0.149938	-0.0665522	0.0752539	-0.0279218	-0.0749101	-0.114204	0.0293892	0.0498992	0.0891251	0.11121	0.110565	-0.056758	0.101185	-0.164484	-0.0455155	-0.230403	0.101771	-0.191543	-0.0650594	-0.0432011	0.0753	-0.0501947	-0.0385718	-0.1737	0.211246	-0.142914	-0.0758219	M4 yellow Complement/Coagulation|0.3923
SIRT2|Q8IXJ6	yellow	0.0195249	-0.540289	-0.408225	0.391422	-0.00959974	-0.058074	-0.0706138	0.0143729	0.0308543	0.177658	-0.0068659	0.332773	-0.166727	0.136809	-0.209677	-0.279663	-0.0742894	-0.303797	-0.418991	0.157695	0.112567	-0.474213	-0.180956	0.333118	0.221722	0.169283	0.136928	-0.517763	0.426913	-0.1489	-0.26599	M4 yellow Complement/Coagulation|0.3914
C1S|P09871	yellow	-0.0326746	-0.301714	-0.454522	0.390247	-0.130541	-0.266737	-0.358585	0.189466	0.363314	0.229866	-0.467042	0.325625	0.126478	-0.37389	-0.166302	0.109464	0.302564	0.371011	0.164468	0.0396501	0.369607	0.107677	0.114439	-0.193555	-0.208369	-0.130548	0.0659512	-0.378325	0.268297	-0.172798	-0.214763	M4 yellow Complement/Coagulation|0.3902
TNXB|P22105	yellow	-0.204423	-0.31832	-0.253653	0.389063	-0.0983448	-0.123952	-0.0836797	0.118385	0.0473871	0.0366036	-0.0942367	0.199972	0.270053	-0.0638288	0.230766	-0.0583521	0.247538	0.0664653	0.0329988	-0.318172	0.288522	-0.205359	0.204	-0.188176	0.0587016	-0.0535114	0.107157	-0.360772	0.342925	-0.15739	-0.174586	M4 yellow Complement/Coagulation|0.3891
COL18A1|P39060	yellow	-0.310213	-0.401538	-0.193161	0.382401	-0.244493	-0.285291	0.020663	-0.0920145	0.181593	-0.0504589	-0.179107	0.225266	0.30744	0.159566	0.0355085	0.018825	0.277152	-0.122935	0.0625816	-0.197115	0.31086	-0.370261	0.0899607	-0.13145	0.110458	0.0767454	0.100075	-0.469011	0.420021	-0.117657	-0.387272	M4 yellow Complement/Coagulation|0.3824
PRTN3|P24158	yellow	-0.34513	-0.351367	-0.204755	0.3693	-0.388816	-0.368915	0.0239096	-0.0678925	0.274205	-0.199788	-0.411024	0.0665982	0.246627	0.0887571	-0.0824082	-0.116816	0.390685	-0.113535	0.147103	-0.327102	0.266838	-0.377816	-0.0614496	-0.156217	0.293394	0.203523	0.270419	-0.30838	0.305366	-0.284439	-0.263968	M4 yellow Complement/Coagulation|0.3693
COL6A3|P12111	yellow	-0.183958	-0.108415	-0.108993	0.368765	-0.056241	-0.198101	-0.0167209	-0.0186511	0.122956	-0.205056	-0.208001	0.00934968	0.222825	-0.115903	0.0422902	0.117833	0.357796	0.14019	0.243138	-0.152636	0.187824	-0.0622462	0.229142	-0.298261	-0.0913635	-0.092711	0.0249315	-0.337879	0.254374	-0.0967219	-0.346427	M4 yellow Complement/Coagulation|0.3688
VIT|Q6UXI7	yellow	0.112714	-0.370118	-0.330166	0.367263	0.0361766	0.0347142	-0.0821404	0.0605872	0.0657917	0.173245	-0.0380335	0.214968	-0.226203	0.0775451	-0.257611	-0.179908	-0.0897684	-0.124489	-0.37312	0.180905	0.0179934	-0.211677	-0.180022	0.217323	0.0224776	-0.00532633	-0.00302632	-0.473875	0.365451	-0.0529842	-0.25824	M4 yellow Complement/Coagulation|0.3673
PDCD1LG2|Q9BQ51	yellow	0.262415	-0.264492	-0.20991	0.352629	-0.0353869	-0.0358706	0.0234977	0.232359	0.14248	0.0786846	-0.271433	-0.0475264	-0.369301	0.00118231	-0.471297	-0.226943	-0.0588346	-0.0136504	-0.167651	0.226799	-0.136464	-0.0819651	-0.333621	0.229704	0.113452	-0.0208394	0.190275	-0.24803	0.281158	-0.177123	-0.0868247	M4 yellow Complement/Coagulation|0.3526
MMRN2|Q9H8L6	yellow	-0.17323	-0.195013	-0.233984	0.350937	-0.165113	-0.283826	-0.114152	-0.0522543	0.313711	-0.128989	-0.369096	0.082588	0.0885819	-0.0772019	-0.168974	0.0217419	0.380289	0.0821558	0.171884	-0.0537798	0.211273	-0.0680446	0.0971958	-0.228657	-0.0704758	-0.0636683	-0.0214593	-0.144397	0.119744	-0.186763	-0.0964457	M4 yellow Complement/Coagulation|0.3509
EPHA1|P21709	yellow	-0.0277998	0.0123099	0.0467458	0.350768	-0.0065305	0.0137674	0.155117	-0.108169	-0.000289687	-0.257743	-0.0448769	-0.268799	-0.0933077	0.0898589	-0.0984347	-0.137146	0.0409725	-0.0751253	-0.0112791	-0.02833	-0.211563	-0.00968868	-0.0305628	-0.0980825	-0.0182666	-0.134011	-0.0407694	0.0519319	0.0568005	-0.174527	-0.0564272	M4 yellow Complement/Coagulation|0.3508
MB|P02144	yellow	-0.0898271	-0.299438	-0.211081	0.348361	-0.0753696	-0.113204	-0.166116	0.12882	0.0984179	0.139225	-0.197424	0.26698	0.0569116	-0.0429576	-0.00872713	-0.103679	0.199521	0.0211318	-0.0834669	-0.131949	0.236541	-0.194794	0.0142263	-0.0906699	0.0311485	-0.023088	0.00952975	-0.10978	0.238302	-0.165238	0.0673739	M4 yellow Complement/Coagulation|0.3484
SPINT3|P49223	yellow	-0.278475	-0.2516	-0.0465169	0.346695	-0.402112	-0.307909	0.0957455	-0.167219	0.235412	0.00991373	-0.176482	0.139438	0.151433	0.159376	-0.00648618	0.0342451	-0.0281926	-0.234047	-0.00447509	-0.151505	0.194086	-0.198157	-0.210032	-0.0121755	0.144483	0.0814847	-0.0296352	-0.0381176	0.0860996	-0.0817227	-0.0300541	M4 yellow Complement/Coagulation|0.3467
EDAR|Q9UNE0	yellow	0.0846746	-0.27025	-0.110832	0.346636	0.0945585	0.162061	0.0154939	0.144816	-0.182112	0.00575098	0.182286	0.0190314	-0.0236645	0.04537	0.108719	-0.138374	-0.0515892	-0.021853	-0.191812	-0.112841	-0.0354293	-0.237296	-0.0284442	-0.00316885	-0.059825	-0.143249	-0.0361291	-0.169372	0.287543	-0.058881	0.0413439	M4 yellow Complement/Coagulation|0.3466
RCAN1|P53805	yellow	-0.369091	-0.346582	-0.220889	0.346382	-0.151105	-0.188919	-0.106849	-0.115418	0.140955	0.0929461	0.00974639	0.274856	0.314689	-0.0770365	0.323795	-0.210358	0.12453	-0.00136426	-0.0806961	-0.28305	0.314529	-0.282237	0.189298	-0.258282	0.0138725	-0.0212623	-0.0192807	-0.171847	0.0791878	-0.144401	0.0372415	M4 yellow Complement/Coagulation|0.3464
ADH7|P40394	yellow	0.287006	-0.156779	-0.291747	0.337531	0.268076	0.202968	-0.140599	0.19404	-0.0794578	-0.0420637	-0.105774	-0.0920936	-0.257274	-0.277744	-0.217308	-0.137146	0.0848566	0.250824	-0.136287	0.144469	-0.175226	-0.00976528	0.0610672	0.0115874	-0.0700792	-0.15795	0.174908	-0.0919469	0.17147	-0.202528	-0.0113486	M4 yellow Complement/Coagulation|0.3375
GNPTG|Q9UJJ9	yellow	-0.0942053	-0.155861	0.0246987	0.335332	-0.088529	-0.0139506	0.0122789	0.0320538	-0.0782	0.0405755	0.0329854	0.0633557	0.08912	0.171345	0.148982	-0.107434	0.082828	-0.161718	-0.126795	-0.205467	0.0551992	-0.247674	-0.0470085	-0.0985831	0.0788095	0.0468408	-0.105197	-0.0385637	0.171022	-0.177176	0.00239571	M4 yellow Complement/Coagulation|0.3353
HP|P00738	yellow	0.0176756	-0.120303	-0.0699022	0.321231	-0.00455701	0.0103029	-0.0854719	0.0262711	0.020042	0.135653	0.0186193	0.186636	0.0179684	-0.0995535	-0.0212677	-0.0898599	-0.0464868	0.0513217	-0.0356441	0.140216	0.110084	-0.0288683	-0.103349	-0.0829978	-0.208934	-0.221722	-0.160004	-0.162345	0.0838704	0.0315702	-0.0681732	M4 yellow Complement/Coagulation|0.3212
AMY1A|P04745	yellow	0.145371	-0.252463	-0.175485	0.317925	0.0600064	0.122635	-0.0502153	0.222917	-0.0981344	0.0593118	0.0163819	0.0801617	-0.12751	-0.0682001	-0.0646601	-0.199547	-0.00414586	-0.0608477	-0.173175	-0.0197709	0.0111105	-0.160714	-0.182726	0.0663692	0.0702599	-0.0872633	0.104758	-0.0969227	0.210557	-0.218746	0.105114	M4 yellow Complement/Coagulation|0.3179
FABP4|P15090	yellow	-0.197825	-0.175006	-0.0993163	0.305103	-0.142877	-0.268219	0.0892703	-0.0548693	0.125667	-0.180745	-0.246392	-0.0418631	0.0169546	0.0638533	-0.177061	-0.130485	0.285697	-0.172522	-0.00891872	-0.11631	0.0560595	-0.226488	-0.0126424	-0.0340451	0.26974	0.160283	0.247126	-0.165724	0.221496	-0.264772	-0.121948	M4 yellow Complement/Coagulation|0.3051
ADAMDEC1|O15204	green	0.704203	-0.0335833	-0.331302	-0.255847	0.863974	0.642095	-0.334986	0.483788	-0.419415	0.347983	0.327699	0.00288286	-0.609979	-0.241384	-0.186737	-0.210173	-0.121976	0.305341	-0.504091	0.420773	-0.366709	0.112508	0.228271	0.38642	-0.223487	-0.249711	0.0010317	-0.197596	0.222322	-0.0391419	0.159537	M5 green Chromosome|0.864
MRPL52|Q86TS9	green	0.669103	0.143916	-0.100372	-0.286446	0.861329	0.694293	-0.13668	0.333573	-0.515298	0.166836	0.451829	-0.150327	-0.594787	-0.0881349	-0.065259	-0.152933	-0.242415	0.148573	-0.487794	0.388547	-0.489759	0.110784	0.222229	0.379941	-0.0979314	-0.202023	0.0247618	-0.0668652	0.103845	0.0777374	0.0856786	M5 green Chromosome|0.8613
KIAA1024|Q9UPX6	green	0.640933	0.0122681	-0.245377	-0.213717	0.852231	0.546719	-0.270948	0.33859	-0.34593	0.193273	0.248052	-0.0767348	-0.615312	-0.165897	-0.312812	-0.227999	-0.0422044	0.216973	-0.440452	0.531643	-0.401905	0.0638215	0.251332	0.283574	-0.176117	-0.210088	0.0110602	-0.121419	0.166354	-0.0977939	0.0873112	M5 green Chromosome|0.8522
MST1R|Q04912	green	0.57793	-0.0214556	-0.252928	-0.192161	0.852154	0.448917	-0.246732	0.31824	-0.271397	0.218989	0.205697	-0.0160762	-0.541821	-0.127381	-0.202649	-0.170357	-0.0235936	0.192627	-0.397089	0.531945	-0.312906	0.0674291	0.352807	0.237416	-0.17072	-0.192796	-0.00432198	-0.0781464	0.114903	-0.0229469	0.134553	M5 green Chromosome|0.8522
CCDC90B|Q9GZT6	green	0.626598	-0.0359958	-0.317731	-0.17939	0.847962	0.432917	-0.35082	0.464691	-0.252078	0.23128	0.0927102	0.00154229	-0.519171	-0.256477	-0.240388	-0.164572	0.116989	0.337612	-0.335912	0.449764	-0.226378	0.137926	0.414389	0.215425	-0.181321	-0.19214	0.0872267	-0.100752	0.188454	-0.113001	0.172853	M5 green Chromosome|0.848
BCAR3|O75815	green	0.638058	-0.0217914	-0.371104	-0.225654	0.847178	0.578566	-0.315493	0.498423	-0.378639	0.229912	0.22451	-0.0688108	-0.565343	-0.293713	-0.200315	-0.245058	0.0355675	0.333541	-0.398976	0.370952	-0.357647	0.147157	0.399759	0.303003	-0.151634	-0.281235	0.148359	-0.193353	0.249857	-0.0718697	0.101531	M5 green Chromosome|0.8472
IL13|P35225	green	0.561826	-0.035157	-0.291632	-0.173473	0.844041	0.58344	-0.325404	0.489602	-0.409525	0.217454	0.265083	-0.047277	-0.455638	-0.269781	-0.0946673	-0.291855	0.1084	0.314979	-0.365099	0.248179	-0.292597	0.0296736	0.363147	0.183341	-0.155836	-0.297705	0.0579374	-0.0821282	0.235949	-0.181913	0.240098	M5 green Chromosome|0.844
PAPPA2|Q9BXP8	green	0.310807	0.132055	-0.0349542	-0.174649	0.843026	0.395661	-0.115197	0.053557	-0.3241	-0.0201856	0.351051	-0.147994	-0.292741	-0.0421154	0.00704497	-0.0576652	0.0644679	0.117194	-0.243801	0.381002	-0.31987	0.0274675	0.586176	-0.0452998	-0.204304	-0.195652	-0.136251	-0.00513194	0.0306057	-0.0129184	0.0303459	M5 green Chromosome|0.843
SMR3A|Q99954	green	0.489502	0.063531	-0.169204	-0.203037	0.842951	0.436672	-0.207066	0.316434	-0.28437	0.108589	0.170565	-0.131787	-0.410791	-0.152359	-0.11963	-0.177079	0.116414	0.281227	-0.248012	0.362501	-0.300096	0.0992911	0.500636	0.0747908	-0.165692	-0.208078	0.00865901	0.00550303	0.0860118	-0.0617407	0.169963	M5 green Chromosome|0.843
KMT2D|O14686	green	0.443571	0.171145	-0.0744819	-0.277773	0.842387	0.568752	-0.150075	0.173584	-0.407528	0.1136	0.476305	-0.118157	-0.407917	-0.13057	0.0883461	-0.0803931	-0.129995	0.199718	-0.395991	0.378368	-0.384326	0.116373	0.410506	0.123069	-0.199056	-0.212276	-0.13445	0.00940697	-0.0309656	0.0578358	0.118494	M5 green Chromosome|0.8424
SATB1|Q01826	green	0.713348	-0.000902882	-0.24741	-0.213929	0.837053	0.608356	-0.248507	0.418662	-0.406972	0.246674	0.30539	-0.0524637	-0.636105	-0.144142	-0.225668	-0.181478	-0.101133	0.178437	-0.480948	0.509815	-0.395768	0.0668631	0.206811	0.327225	-0.155482	-0.225505	0.0386403	-0.0901878	0.178662	-0.0430972	0.12793	M5 green Chromosome|0.8371
COX4I2|Q96KJ9	green	0.735848	0.0997382	-0.234654	-0.240666	0.825883	0.567718	-0.373944	0.494448	-0.32158	0.411598	0.240102	0.0589866	-0.593322	-0.268377	-0.180877	-0.184104	-0.0830803	0.363907	-0.403966	0.536987	-0.273635	0.27037	0.213766	0.309039	-0.285855	-0.299808	-0.0700485	-0.088198	0.0940824	0.107033	0.136931	M5 green Chromosome|0.8259
AP4M1|O00189	green	0.5654	0.106693	-0.173468	-0.231578	0.821334	0.46234	-0.193332	0.277277	-0.266438	0.163158	0.240926	-0.0941099	-0.546097	-0.150981	-0.178762	-0.0991436	-0.0931242	0.190357	-0.366415	0.520337	-0.378442	0.13012	0.325205	0.228494	-0.138487	-0.167568	0.0138867	-0.0465332	0.0776991	0.0431755	0.0698322	M5 green Chromosome|0.8213
PLA2G2C|Q5R387	green	0.465337	0.086638	-0.113694	-0.268406	0.816384	0.505916	-0.215483	0.228794	-0.378715	0.161822	0.351393	-0.0250541	-0.373376	-0.0741202	0.0218926	-0.0132019	-0.0194525	0.146555	-0.340839	0.365781	-0.28327	0.0636243	0.42511	0.106972	-0.186337	-0.158226	-0.0997084	0.0013183	0.070805	0.0418055	0.141841	M5 green Chromosome|0.8164
TPO|P07202	green	0.617161	0.0732047	-0.201134	-0.315954	0.804923	0.641255	-0.248131	0.472186	-0.462531	0.226133	0.385535	-0.090019	-0.500093	-0.223869	-0.0504278	-0.213106	-0.087119	0.282312	-0.374751	0.309238	-0.374462	0.130714	0.249167	0.295153	-0.209401	-0.321216	-0.0097599	-0.0595165	0.129059	0.0213784	0.208337	M5 green Chromosome|0.8049
CDNF|Q49AH0	green	0.392555	0.0859764	-0.177321	-0.144605	0.800046	0.317112	-0.238816	0.198735	-0.168611	0.152695	0.204224	-0.0268299	-0.357568	-0.162725	-0.106548	-0.0492752	0.0900605	0.273549	-0.246502	0.497278	-0.233773	0.124496	0.539462	0.0256164	-0.266142	-0.2621	-0.110069	-0.0705144	0.0682224	0.0239446	0.0325539	M5 green Chromosome|0.8
GLP1R|P43220	green	0.779066	0.0952566	-0.196782	-0.289365	0.79817	0.567327	-0.329233	0.570378	-0.316184	0.332023	0.152509	-0.0162671	-0.608299	-0.195492	-0.271745	-0.174468	-0.016297	0.344343	-0.33188	0.53439	-0.303827	0.252736	0.174711	0.301546	-0.221262	-0.26498	0.0139049	-0.012758	0.156597	-0.0212932	0.227619	M5 green Chromosome|0.7982
SPRY1|O43609	green	0.399777	0.156363	-0.0808966	-0.181644	0.791016	0.397361	-0.176098	0.13031	-0.218277	0.0961011	0.283834	-0.0828379	-0.365684	-0.0911336	-0.0303817	-0.0797987	-0.048129	0.176765	-0.295659	0.4372	-0.282249	0.161805	0.484187	0.083123	-0.250962	-0.182375	-0.156124	-0.033139	-0.00233802	0.133523	0.0580131	M5 green Chromosome|0.791
PI15|O43692	green	0.642788	-0.0390747	-0.347675	-0.208023	0.788505	0.685253	-0.354927	0.483415	-0.457574	0.229139	0.304328	-0.0394306	-0.504847	-0.261506	-0.0857022	-0.244815	-0.0208747	0.353259	-0.408013	0.269112	-0.351051	0.0734286	0.257822	0.233172	-0.183329	-0.268003	0.0551829	-0.179623	0.230583	-0.13046	0.111462	M5 green Chromosome|0.7885
RB1|P06400	green	0.17797	0.0511415	-0.0905657	-0.0843457	0.785123	0.297599	-0.119491	-0.00353453	-0.232362	-0.0147224	0.323619	-0.112221	-0.185505	-0.0554588	0.0955409	-0.104539	0.139459	0.115205	-0.238109	0.295178	-0.237748	-0.0264355	0.673008	-0.09786	-0.177967	-0.212816	-0.154591	-0.021804	0.00245529	0.017074	0.0422416	M5 green Chromosome|0.7851
C14orf180|Q8N912	green	0.591121	0.196347	-0.121392	-0.317968	0.783906	0.439414	-0.231932	0.278806	-0.171918	0.169713	0.182344	-0.134777	-0.559256	-0.223366	-0.266991	-0.0433597	-0.0826518	0.305226	-0.267634	0.578689	-0.37758	0.290576	0.275133	0.191198	-0.278081	-0.232636	-0.0930272	-0.039577	-0.0286377	0.10115	0.0903964	M5 green Chromosome|0.7839
ICAM3|P32942	green	0.396331	0.0238261	-0.159407	-0.215232	0.781688	0.325417	-0.134438	0.166953	-0.170706	0.0949892	0.184717	-0.14691	-0.431151	-0.0768204	-0.160133	-0.147763	-0.0473216	0.15294	-0.285388	0.439084	-0.336076	0.0292713	0.419424	0.132112	-0.121393	-0.119759	0.00729767	-0.0745806	0.0599381	0.0914394	0.0632009	M5 green Chromosome|0.7817
CDC42BPB|Q9Y5S2	green	0.295446	-0.0248402	-0.242349	-0.12372	0.778192	0.260713	-0.195738	0.205624	-0.196542	0.0335103	0.129364	-0.0813419	-0.297156	-0.138752	-0.0555888	-0.0876939	0.238291	0.229767	-0.236832	0.280904	-0.200269	0.0234805	0.718586	0.0131363	-0.128816	-0.11349	0.0591119	-0.105025	0.142539	-0.113517	0.063558	M5 green Chromosome|0.7782
CCL26|Q9Y258	green	0.347607	0.0971081	-0.148276	-0.264175	0.773642	0.323068	-0.219601	0.175463	-0.209102	0.102519	0.216874	-0.0633903	-0.306427	-0.0991342	-0.0250746	-0.0676426	0.0905413	0.246169	-0.254752	0.341825	-0.215313	0.0886533	0.5641	0.0787961	-0.189641	-0.143985	-0.116414	-0.015001	0.0590019	-0.072464	0.128674	M5 green Chromosome|0.7736
ABHD12|Q8N2K0	green	0.58653	0.0899047	-0.196668	-0.181307	0.767456	0.513267	-0.358598	0.486647	-0.345328	0.223946	0.196039	-0.00949952	-0.392357	-0.339583	-0.121654	-0.132795	0.112935	0.396029	-0.204419	0.345032	-0.216275	0.187393	0.3303	0.118242	-0.281917	-0.342341	0.00266093	-0.0241641	0.119094	0.0969861	0.183602	M5 green Chromosome|0.7675
ZNF175|Q9Y473	green	0.342557	-0.0124714	-0.183657	-0.102713	0.76661	0.451473	-0.237398	0.261903	-0.324757	0.135903	0.310777	-0.0500091	-0.264123	-0.165112	0.100028	-0.26805	0.0599983	0.258773	-0.29781	0.197071	-0.208517	0.0163551	0.50485	0.0367182	-0.21086	-0.312008	-0.0935663	-0.0712389	0.112569	-0.0451176	0.161189	M5 green Chromosome|0.7666
IFNA6|P05013	green	0.411338	0.140013	-0.0882018	-0.207365	0.765191	0.357263	-0.129975	0.132398	-0.256927	0.0503624	0.21804	-0.153583	-0.420318	-0.0917219	-0.127211	-0.0682076	-0.00194642	0.148863	-0.276128	0.471252	-0.356166	0.128339	0.431692	0.0892486	-0.161422	-0.107457	-0.0343245	-0.000434071	-0.0288144	0.0308057	0.0353665	M5 green Chromosome|0.7652
CKLF|Q9UBR5	green	0.473292	0.156455	-0.0615443	-0.250011	0.763957	0.514894	-0.147729	0.264849	-0.382276	0.0853763	0.306634	-0.196791	-0.423189	-0.15593	-0.0491588	-0.182906	-0.0463642	0.216023	-0.296999	0.26191	-0.403778	0.11409	0.31469	0.140411	-0.152796	-0.195333	-0.00762598	0.0887026	0.019319	-0.0567268	0.210827	M5 green Chromosome|0.764
KLK9|Q9UKQ9	green	0.710331	0.0899748	-0.220017	-0.179919	0.763623	0.679368	-0.311841	0.529023	-0.442608	0.290997	0.312899	-0.0140539	-0.52897	-0.248127	-0.0699179	-0.167346	-0.105299	0.329257	-0.40505	0.337381	-0.317249	0.155481	0.178788	0.312284	-0.196484	-0.246808	0.0377498	-0.0935716	0.166418	0.0157914	0.141058	M5 green Chromosome|0.7636
TNFRSF10A|O00220	green	0.341241	-0.0345411	-0.296353	-0.132434	0.763463	0.29354	-0.302147	0.332566	-0.208228	0.107042	0.0984908	-0.0201842	-0.259814	-0.253383	-0.0221596	-0.051564	0.282213	0.360615	-0.183754	0.209989	-0.123265	0.0895891	0.685528	-0.0155908	-0.203216	-0.191805	0.0645323	-0.0886224	0.164377	-0.0905622	0.158877	M5 green Chromosome|0.7635
SERF1A|O75920	green	0.544779	0.0555088	-0.142482	-0.204456	0.755931	0.394744	-0.171858	0.21797	-0.220168	0.170218	0.163332	-0.134123	-0.561142	-0.0956727	-0.316915	-0.195587	-0.0632808	0.162266	-0.333162	0.518914	-0.400891	0.136849	0.277994	0.258557	-0.183257	-0.148876	-0.0390281	-0.0467878	0.0297886	0.0803249	0.0621424	M5 green Chromosome|0.7559
GPR101|Q96P66	green	0.376996	0.0849538	-0.0938439	-0.146969	0.753393	0.458688	-0.180435	0.188252	-0.360131	0.099911	0.39378	-0.0406689	-0.301362	-0.0906225	0.0637205	-0.0731237	0.0163703	0.128633	-0.310957	0.317478	-0.265507	0.0101706	0.425807	0.0465393	-0.216329	-0.223738	-0.123316	-0.0194039	0.0617858	0.1158	0.0570683	M5 green Chromosome|0.7534
ZNRF4|Q8WWF5	green	0.36161	0.0933556	-0.166704	-0.13972	0.752299	0.331118	-0.243374	0.242479	-0.206991	0.0785133	0.134313	-0.0616238	-0.295619	-0.193906	-0.0432856	-0.0573491	0.121544	0.278768	-0.197979	0.295634	-0.196921	0.113497	0.56774	-0.0160671	-0.189528	-0.148937	0.0136625	-0.0471181	0.0725345	0.0018586	0.0734247	M5 green Chromosome|0.7523
MATN3|O15232	green	0.60512	-0.0915803	-0.325049	-0.157326	0.752201	0.366898	-0.275093	0.3959	-0.202598	0.234892	0.0401814	-0.0121077	-0.588852	-0.150954	-0.367372	-0.255749	0.0510479	0.204339	-0.363432	0.530376	-0.28717	0.0471965	0.223577	0.277321	-0.106287	-0.140034	0.0727163	-0.193169	0.197451	-0.176782	0.0660618	M5 green Chromosome|0.7522
MYCT1|Q8N699	green	0.613726	-0.0605422	-0.353061	-0.100047	0.746517	0.273847	-0.336311	0.374016	0.0274985	0.284691	-0.0619911	-0.0209584	-0.619381	-0.28062	-0.452318	-0.241551	0.0164439	0.309653	-0.322612	0.699795	-0.267458	0.200358	0.251177	0.256854	-0.21829	-0.256287	0.0212205	-0.109092	0.0964418	0.00900342	0.134989	M5 green Chromosome|0.7465
FCRL6|Q6DN72	green	0.440266	-0.164858	-0.411106	-0.0142415	0.745464	0.264569	-0.368676	0.354686	-0.062242	0.246297	0.0142059	0.0795111	-0.412028	-0.276654	-0.256092	-0.277085	0.163776	0.307938	-0.293187	0.453414	-0.123853	0.0634993	0.473428	0.120403	-0.237509	-0.303888	0.00196967	-0.172558	0.201897	-0.161273	0.149538	M5 green Chromosome|0.7455
TNKS|O95271	green	0.45866	0.12227	-0.034854	-0.238793	0.743978	0.700789	-0.0887508	0.175312	-0.602063	0.0319407	0.588013	-0.203121	-0.42036	-0.0430032	0.0936304	-0.220257	-0.208806	0.0737449	-0.468286	0.19688	-0.495896	-0.0486565	0.192746	0.182728	-0.101026	-0.167496	-0.058765	-0.0149206	0.0561021	-0.0287366	0.120336	M5 green Chromosome|0.744
GNAS|O95467	green	0.693839	-0.0465729	-0.317009	-0.183297	0.741434	0.395202	-0.319987	0.496218	-0.141459	0.302359	0.010774	-0.00111536	-0.608994	-0.252318	-0.37415	-0.154836	0.0290758	0.35073	-0.323463	0.590672	-0.267871	0.182841	0.213746	0.222038	-0.239123	-0.265965	0.0571121	-0.109758	0.201577	-0.0142474	0.179852	M5 green Chromosome|0.7414
MAMDC2|Q7Z304	green	0.666568	0.017211	-0.255902	-0.275499	0.73452	0.605641	-0.216153	0.320741	-0.36116	0.210916	0.330723	-0.0499981	-0.665853	-0.0846139	-0.232862	-0.19967	-0.18814	0.140026	-0.543148	0.50232	-0.43646	0.0716502	0.134022	0.405243	-0.137888	-0.152493	-0.000378495	-0.12866	0.123937	0.0596757	0.0774308	M5 green Chromosome|0.7345
IFNA10|P01566	green	0.416004	0.0579235	-0.129213	-0.159057	0.728714	0.421755	-0.17682	0.295251	-0.3232	0.169278	0.242516	-0.0453174	-0.361164	-0.124488	-0.00296912	-0.186991	0.0680179	0.238002	-0.309768	0.262322	-0.223461	0.0841854	0.427515	0.122742	-0.116981	-0.114388	-0.0195217	0.0180611	0.109063	-0.0290398	0.186951	M5 green Chromosome|0.7287
CA4|P22748	green	0.483804	0.174474	-0.0382531	-0.128439	0.7247	0.573153	-0.193834	0.279407	-0.430678	0.138525	0.418281	-0.0936173	-0.347566	-0.213769	0.0609282	-0.127801	-0.0826776	0.222167	-0.272596	0.328219	-0.314385	0.172172	0.205277	0.0367704	-0.27904	-0.402375	-0.154315	0.132788	-0.0181232	0.0304785	0.263378	M5 green Chromosome|0.7247
BRD2|P25440	green	0.311749	0.243796	0.0122306	-0.318391	0.722671	0.318112	-0.161471	0.149274	-0.21418	0.0502743	0.238173	-0.102633	-0.182579	-0.0976847	0.125942	0.116599	0.0782761	0.270888	-0.0921314	0.279704	-0.186515	0.251129	0.641163	-0.0379547	-0.247543	-0.203688	-0.134232	0.116135	-0.0997536	0.299244	0.123098	M5 green Chromosome|0.7227
C1D|Q13901	green	0.616541	0.00737393	-0.259973	-0.124427	0.722038	0.479826	-0.344536	0.454169	-0.269453	0.358927	0.193951	0.0833387	-0.487329	-0.222481	-0.158448	-0.142022	-0.0880686	0.31004	-0.361459	0.441061	-0.204454	0.152199	0.193838	0.197011	-0.252885	-0.248779	-0.0723893	-0.0956956	0.164896	0.0288219	0.168343	M5 green Chromosome|0.722
NSG1|P42857	green	0.56587	0.167334	-0.177472	-0.240301	0.721914	0.452187	-0.225049	0.323616	-0.25379	0.138339	0.138556	-0.145599	-0.530297	-0.145131	-0.246413	-0.0820407	0.00864572	0.229156	-0.304104	0.413381	-0.402207	0.188137	0.247929	0.185413	-0.178269	-0.181125	0.00256272	-0.00569988	0.0355972	-0.0886297	0.0758602	M5 green Chromosome|0.7219
SPTLC2|O15270	green	0.572622	-0.0508169	-0.336029	-0.0841392	0.719213	0.382123	-0.377221	0.488494	-0.132256	0.282502	0.024277	0.00580538	-0.461072	-0.387302	-0.263501	-0.287047	0.107032	0.413862	-0.209101	0.433722	-0.195688	0.207171	0.328045	0.169636	-0.242423	-0.365205	0.0697563	-0.0978648	0.162437	0.0266017	0.202667	M5 green Chromosome|0.7192
ZNF264|O43296	green	0.19532	-0.00406899	-0.0695951	-0.146534	0.718782	0.281658	0.0295349	-0.0421468	-0.258787	-0.113021	0.294734	-0.190463	-0.294604	0.123781	-0.0173836	-0.0885622	0.034192	-0.0812136	-0.314746	0.312545	-0.339486	-0.175963	0.555752	0.0992463	0.0512425	0.0295764	0.0154439	-0.103817	0.0826766	-0.0367019	-0.0841594	M5 green Chromosome|0.7188
SNX17|Q15036	green	0.349491	-0.136955	-0.386282	-0.0554084	0.712537	0.142918	-0.252617	0.273418	0.0276292	0.149755	-0.0831358	-0.0199417	-0.371835	-0.253056	-0.285191	-0.165507	0.231928	0.270862	-0.20796	0.453406	-0.14192	0.0381746	0.540349	0.141448	-0.0205505	-0.142339	0.242741	-0.192375	0.175331	-0.0939674	-0.00968579	M5 green Chromosome|0.7125
FGF16|O43320	green	0.34568	0.00722419	-0.0579769	-0.185393	0.707635	0.427461	-0.0163467	0.129985	-0.334608	-0.078905	0.333563	-0.228554	-0.390231	0.159507	-0.102262	-0.185362	0.0323875	-0.0566644	-0.371263	0.278465	-0.400196	-0.165568	0.372142	0.179831	-0.0023366	-0.020813	-0.00320638	-0.116108	0.190552	-0.0296898	-0.0495316	M5 green Chromosome|0.7076
CNDP2|Q96KP4	green	0.667387	0.10612	-0.186811	-0.267172	0.7041	0.450919	-0.201358	0.273662	-0.180162	0.221421	0.186411	-0.0606622	-0.67844	-0.142293	-0.341911	-0.0862104	-0.234577	0.134468	-0.393421	0.683115	-0.402094	0.226194	0.0801368	0.37042	-0.196433	-0.162312	-0.0524638	-0.0244707	-0.0111431	0.108716	0.0920872	M5 green Chromosome|0.7041
FAM174B|Q3ZCQ3	green	0.610224	0.336298	0.105182	-0.33791	0.700686	0.632184	-0.0055778	0.215152	-0.436184	0.0770731	0.43331	-0.282941	-0.536908	-0.081835	-0.0778857	-0.119214	-0.341528	0.173088	-0.326259	0.411464	-0.546616	0.30667	0.104484	0.291716	-0.207157	-0.190535	-0.0996242	0.181908	-0.129878	0.128075	0.159265	M5 green Chromosome|0.7007
COA3|Q9Y2R0	green	0.485484	-0.08822	-0.287722	-0.141372	0.696434	0.289001	-0.170928	0.296315	-0.191016	0.102023	0.0638886	-0.104757	-0.490166	-0.104982	-0.291244	-0.17315	0.10437	0.140324	-0.325135	0.415614	-0.306827	-0.0343311	0.359993	0.284729	0.0322352	-0.0558339	0.201812	-0.166631	0.205651	-0.139331	-0.0111354	M5 green Chromosome|0.6964
IQCF3|P0C7M6	green	0.364431	0.0322308	-0.159088	-0.114687	0.694595	0.341137	-0.2186	0.278457	-0.219364	0.123861	0.183895	-0.0259611	-0.297144	-0.085331	-0.0734694	-0.188464	0.134078	0.217278	-0.212996	0.301917	-0.170083	0.0231761	0.407759	-0.0144248	-0.163178	-0.176357	-0.0594821	-0.0197673	0.110963	-0.0604631	0.134207	M5 green Chromosome|0.6946
HRASLS2|Q9NWW9	green	0.484458	0.111506	-0.0866074	-0.146768	0.693373	0.422952	-0.228796	0.293173	-0.22571	0.121917	0.204897	-0.0333169	-0.357596	-0.0862771	-0.0710501	-0.0141808	0.0228455	0.19646	-0.240227	0.403622	-0.205041	0.0973392	0.291135	0.0991553	-0.242568	-0.202163	-0.105439	-0.0500955	0.0773674	0.112676	0.0516991	M5 green Chromosome|0.6934
P2RX2|Q9UBL9	green	0.305748	0.174371	0.0598564	-0.205501	0.693302	0.440346	0.0194412	-0.0758395	-0.360849	-0.03324	0.488849	-0.161464	-0.347814	0.0639258	0.0464024	-0.00114949	-0.193165	0.00252174	-0.367994	0.395671	-0.409392	-0.0146761	0.315992	0.153901	-0.164398	-0.116739	-0.188632	0.0531749	-0.0742248	0.118732	0.0609587	M5 green Chromosome|0.6933
PCDHB1|Q9Y5F3	green	0.545487	0.115376	-0.179741	-0.278374	0.69183	0.558925	-0.407049	0.425591	-0.313431	0.337523	0.271666	0.0662006	-0.297443	-0.340133	0.0512085	-0.113665	-0.0353289	0.45574	-0.179937	0.29419	-0.153302	0.27022	0.34138	0.0877225	-0.339638	-0.360555	-0.115202	0.0285813	0.0437209	0.1595	0.227226	M5 green Chromosome|0.6918
PRRG4|Q9BZD6	green	0.484051	0.187634	0.07211	-0.251387	0.68714	0.628942	0.134573	0.0592116	-0.556309	-0.0650865	0.534598	-0.347831	-0.567617	0.137965	-0.0702227	-0.172022	-0.32187	-0.0915379	-0.48395	0.29611	-0.631169	-0.00800098	0.126548	0.34122	-0.0384193	-0.0328714	-0.0795432	-0.000418524	0.0405858	0.0131042	-0.0140309	M5 green Chromosome|0.6871
EIF1AX|P47813	green	0.417568	0.260527	0.0705827	-0.316794	0.68703	0.619951	-0.0517697	0.134306	-0.508705	0.00806393	0.525436	-0.193852	-0.346622	-0.00919186	0.108307	0.0118653	-0.18255	0.0751835	-0.327186	0.245014	-0.442712	0.0507323	0.214904	0.150972	-0.196718	-0.199289	-0.148092	0.0732907	-0.0248481	0.03993	0.0860408	M5 green Chromosome|0.687
BDP1|A6H8Y1	green	0.561531	0.141325	-0.158069	-0.267192	0.685485	0.471241	-0.155294	0.229081	-0.186949	0.106723	0.214529	-0.17567	-0.62242	-0.153289	-0.316412	-0.187094	-0.168551	0.142727	-0.369147	0.572019	-0.471171	0.169788	0.138452	0.273028	-0.131189	-0.184653	-0.0217083	-0.0167798	-0.0222601	0.0141706	0.0593907	M5 green Chromosome|0.6855
IL17F|Q96PD4	green	0.26628	0.251852	0.00719078	-0.193848	0.680793	0.229939	-0.112113	0.0510138	-0.11307	0.00912006	0.123906	-0.204405	-0.194979	-0.20295	-0.0272724	0.0738399	0.101061	0.321364	0.00349372	0.367208	-0.232459	0.309851	0.566587	-0.155347	-0.335012	-0.280926	-0.154319	0.140308	-0.15507	0.108354	0.107563	M5 green Chromosome|0.6808
KCNG4|Q8TDN1	green	0.370433	-0.01817	-0.269896	0.0648544	0.679615	0.178015	-0.361543	0.251285	0.043222	0.285824	-0.00565117	0.104132	-0.314636	-0.274991	-0.203985	-0.194894	0.182121	0.360477	-0.156019	0.546773	-0.0499434	0.179195	0.431863	-0.0331439	-0.304773	-0.344485	-0.163583	-0.0771215	0.0849846	-0.0665708	0.0794198	M5 green Chromosome|0.6796
VSTM5|A8MXK1	green	0.669941	0.0797609	-0.157637	-0.149759	0.676227	0.475757	-0.152463	0.307401	-0.244556	0.213946	0.147785	-0.0859709	-0.647153	-0.141528	-0.3531	-0.125985	-0.212134	0.183856	-0.37318	0.606654	-0.397574	0.222494	0.0664843	0.34865	-0.147965	-0.193493	0.0584059	-0.0089545	0.0654003	0.0745792	0.144755	M5 green Chromosome|0.6762
NPPC|P23582	green	0.65934	0.10707	-0.200966	-0.225816	0.67504	0.404916	-0.266514	0.27826	-0.133884	0.27086	0.0826657	-0.0191364	-0.623201	-0.208143	-0.394923	-0.132114	-0.17393	0.22341	-0.305936	0.668504	-0.323945	0.266779	0.107964	0.330659	-0.238198	-0.186295	-0.0623724	-0.0383152	-0.0155991	0.0636632	0.0843619	M5 green Chromosome|0.675
KAT6A|Q92794	green	0.211803	-0.0707897	-0.210601	-0.0524372	0.673619	0.249533	-0.183538	0.1417	-0.207892	0.0776631	0.219074	0.00291224	-0.239569	-0.0454639	0.0553967	-0.131218	0.117973	0.122419	-0.294506	0.23301	-0.140711	-0.0816316	0.573464	0.0260647	-0.124091	-0.125193	-0.0607954	-0.0987283	0.156302	-0.0808013	0.0852353	M5 green Chromosome|0.6736
BAMBI|Q13145	green	0.437305	-0.0047946	-0.173833	-0.120927	0.672888	0.537073	-0.306126	0.244498	-0.345812	0.305928	0.449967	0.127489	-0.337792	-0.11328	0.092732	-0.175338	-0.0881429	0.173402	-0.477675	0.336209	-0.191362	-0.0105586	0.217804	0.126195	-0.28367	-0.249624	-0.23758	-0.130234	0.0815374	0.0730295	0.0953472	M5 green Chromosome|0.6729
ADAM29|Q9UKF5	green	0.417174	0.0123037	-0.247989	-0.0872603	0.670141	0.423979	-0.341969	0.443098	-0.260167	0.218865	0.139984	0.0282535	-0.215843	-0.358228	0.0584372	-0.140585	0.154955	0.47183	-0.148799	0.141229	-0.084642	0.148067	0.444168	0.0289498	-0.24888	-0.333596	0.0274194	-0.0551014	0.157448	-0.0283034	0.200407	M5 green Chromosome|0.6701
NDNF|Q8TB73	green	0.438374	0.0953471	0.00711458	-0.25093	0.661855	0.332319	0.0499772	0.126419	-0.21804	-0.0710218	0.140801	-0.287837	-0.486702	0.191617	-0.271528	-0.0942255	0.0409978	0.000361993	-0.29734	0.410166	-0.421021	-0.0236049	0.274961	0.191863	-0.0450456	-0.0427441	-0.0164435	0.0853167	0.152799	-0.0576183	0.131925	M5 green Chromosome|0.6619
CD80|P33681	green	0.575649	0.150206	-0.130074	-0.250604	0.65742	0.39667	-0.256804	0.316061	-0.169145	0.240839	0.154791	0.00188202	-0.465815	-0.182001	-0.187352	-0.11798	-0.098627	0.261927	-0.235784	0.558734	-0.238403	0.256134	0.154697	0.201652	-0.283662	-0.201656	-0.0757344	0.00533164	-0.0280804	0.0654494	0.12011	M5 green Chromosome|0.6574
CPN1|P15169	green	0.423029	-0.140344	-0.369188	-0.249079	0.657363	0.249081	-0.235294	0.266649	-0.088142	0.175122	0.00960741	0.0233987	-0.422815	-0.167441	-0.279826	-0.0773098	0.094187	0.217101	-0.281858	0.414888	-0.177372	-0.0171809	0.359745	0.298905	0.0326771	0.0128388	0.223463	-0.263019	0.196732	-0.10751	-0.0319998	M5 green Chromosome|0.6574
SYT17|Q9BSW7	green	0.493209	0.114346	-0.0746361	-0.227518	0.654953	0.368209	-0.0600072	0.232273	-0.238395	0.0392561	0.108106	-0.269135	-0.521502	-0.109956	-0.334794	-0.188746	-0.033175	0.130826	-0.239702	0.444993	-0.453822	0.168925	0.208705	0.211204	-0.0545837	-0.144058	0.0855536	0.0410658	0.00842968	-0.0733639	0.0977368	M5 green Chromosome|0.655
TPM2|P07951	green	0.540039	-0.144506	-0.463278	-0.0852035	0.654809	0.321729	-0.519389	0.507422	-0.0627783	0.529738	0.025526	0.270786	-0.404887	-0.407814	-0.157935	-0.18486	0.0213274	0.449632	-0.285873	0.47335	-0.00664012	0.175705	0.232364	0.158359	-0.306589	-0.389223	-0.0647287	-0.167023	0.144148	-0.0544865	0.223689	M5 green Chromosome|0.6548
UNC13A|Q9UPW8	green	0.433913	0.0504938	-0.116895	-0.104538	0.65321	0.581581	-0.228841	0.374176	-0.480273	0.1668	0.362922	-0.00942672	-0.248335	-0.164509	0.164534	-0.136074	0.0342226	0.285645	-0.268117	0.0817625	-0.206415	0.0262819	0.299323	0.0897094	-0.166163	-0.262241	-0.00941054	-0.063161	0.177183	-0.0791683	0.0981749	M5 green Chromosome|0.6532
RETSAT|Q6NUM9	green	0.492134	0.0470468	-0.232772	-0.171198	0.648197	0.324575	-0.404513	0.415433	-0.104132	0.253847	0.00602188	0.0829234	-0.258222	-0.312543	-0.107126	0.0393032	0.124936	0.445857	-0.0743694	0.37997	-0.0487048	0.25633	0.403244	0.0371986	-0.343142	-0.306466	-0.0349333	-0.0347524	0.122391	0.0749212	0.15282	M5 green Chromosome|0.6482
PRLH|P81277	green	0.122853	0.0397257	-0.0326324	-0.129872	0.647001	0.293994	-0.0128604	-0.0716574	-0.259329	-0.0478872	0.383076	-0.143068	-0.16011	0.0194605	0.154754	-0.02992	-0.00235068	0.0478807	-0.265056	0.235716	-0.282673	-0.0879647	0.528716	-0.0628442	-0.16178	-0.149042	-0.125321	-0.0364822	-0.012088	0.0952362	0.0118518	M5 green Chromosome|0.647
SULT4A1|Q9BR01	green	0.153702	0.0456186	-0.0511424	-0.135922	0.64371	0.211761	-0.0339768	-0.0023022	-0.210645	-0.0867105	0.214775	-0.132429	-0.18354	0.0261874	0.0295539	0.0035152	0.141929	0.0597391	-0.192554	0.185038	-0.189888	-0.0455369	0.578549	-0.0328818	-0.0583352	-0.0174027	-0.0233734	0.00571722	-0.00940399	-0.0286199	0.0607256	M5 green Chromosome|0.6437
CREB3L1|Q96BA8	green	0.461708	0.318503	0.127695	-0.274939	0.64286	0.395061	-0.0771704	0.118299	-0.241872	0.0459276	0.278819	-0.194576	-0.423279	0.0314029	-0.147823	0.0325181	-0.0923161	0.0401773	-0.217173	0.526399	-0.37382	0.177947	0.188279	0.125205	-0.200304	-0.17267	-0.191859	0.129291	-0.142422	0.235295	0.0221564	M5 green Chromosome|0.6429
PXDNL|A1KZ92	green	0.343049	0.18414	-0.0211152	-0.174752	0.641915	0.56486	-0.179298	0.157454	-0.477936	0.0296032	0.477387	-0.0989714	-0.237613	-0.0731617	0.226251	0.0191181	0.00765004	0.15036	-0.276961	0.124324	-0.309416	0.0565547	0.346443	-0.0295018	-0.203446	-0.196623	-0.194378	0.0471847	-0.0202957	0.0237718	0.0677683	M5 green Chromosome|0.6419
CTRB2|Q6GPI1	green	0.618852	-0.0554202	-0.194749	-0.0274426	0.638015	0.567586	-0.119995	0.326675	-0.447299	0.114463	0.282076	-0.124388	-0.63104	-0.00611737	-0.221072	-0.195168	-0.0775926	0.0312099	-0.539655	0.350269	-0.435005	-0.0776357	0.0567509	0.317351	-0.0103228	-0.0369053	0.095173	-0.127725	0.298158	-0.0823547	0.0707326	M5 green Chromosome|0.638
ZNF774|Q6NX45	green	0.52988	-0.0916679	-0.302702	-0.117941	0.637662	0.60549	-0.345745	0.425466	-0.387723	0.289861	0.363405	0.109968	-0.408285	-0.208225	0.0359617	-0.153222	-0.0820315	0.234218	-0.472128	0.260614	-0.210356	-0.00929183	0.138383	0.255367	-0.196187	-0.240196	-0.00861793	-0.149078	0.212406	-0.0414053	0.18082	M5 green Chromosome|0.6377
PAPSS1|O43252	green	0.397342	0.144744	0.00274828	-0.402101	0.637035	0.368773	0.0966034	0.162652	-0.273443	-0.0402752	0.218099	-0.356036	-0.432388	-0.0445973	-0.173404	-0.0751517	-0.116454	0.0882049	-0.194716	0.352184	-0.487418	0.0920391	0.265561	0.266974	0.109507	-0.0548361	0.246849	0.0481049	-0.0371777	0.0496049	0.0711818	M5 green Chromosome|0.637
RNGTT|O60942	green	0.424345	-0.0300057	-0.254121	-0.159364	0.633156	0.427468	-0.303407	0.436954	-0.310592	0.226699	0.154609	0.0304262	-0.253198	-0.321628	0.0321327	-0.13337	0.111569	0.397465	-0.195183	0.0917053	-0.11336	0.0976841	0.316932	0.0741789	-0.16888	-0.189791	0.118939	-0.0361327	0.168492	-0.104045	0.262945	M5 green Chromosome|0.6332
TEC|P42680	green	0.296133	0.394405	0.192051	-0.446339	0.632796	0.540825	0.0732323	-0.0122811	-0.506192	-0.122041	0.526953	-0.321595	-0.30483	0.040495	0.178862	-0.0073694	-0.188116	0.0288915	-0.261463	0.126763	-0.479113	0.209973	0.441916	0.149202	-0.0905573	-0.0702255	-0.0753662	0.121411	-0.16926	0.443855	0.0218517	M5 green Chromosome|0.6328
TRAPPC5|Q8IUR0	green	0.138569	0.224235	0.114124	-0.164619	0.632843	0.278149	0.0490164	-0.230331	-0.20406	-0.101029	0.391295	-0.207788	-0.256782	0.0843388	0.00249763	-0.0281346	-0.0807786	-0.0667827	-0.258353	0.392945	-0.377604	0.0240017	0.439198	-0.00989874	-0.133973	-0.0877047	-0.175145	0.0293379	-0.160743	0.102317	-0.105365	M5 green Chromosome|0.6328
SERAC1|Q96JX3	green	0.348406	0.0593254	-0.160319	-0.175612	0.630608	0.166463	-0.204958	0.105776	0.0159145	0.110915	0.0219309	-0.0783601	-0.332092	-0.218549	-0.247054	-0.106148	0.0490441	0.273501	-0.119251	0.542743	-0.225406	0.169596	0.383946	0.0164541	-0.227143	-0.164131	-0.0564466	-0.0381249	-0.0851104	0.23777	0.0167528	M5 green Chromosome|0.6306
PPIB|P23284	green	0.556399	-0.0453056	-0.34188	-0.171026	0.630064	0.556496	-0.374181	0.528515	-0.424099	0.287717	0.265584	0.133423	-0.432207	-0.266126	-0.02959	-0.222159	0.0696755	0.293609	-0.424964	0.17997	-0.140676	0.062194	0.258948	0.284574	-0.149357	-0.168235	0.0804203	-0.0922531	0.235351	-0.032752	0.257946	M5 green Chromosome|0.6301
IFNA4|P05014	green	0.281124	0.113872	0.0214064	-0.252025	0.628422	0.255449	-0.0298079	0.0226068	-0.166531	0.0287591	0.20989	-0.151627	-0.273159	-0.0263005	-0.0808569	-0.133757	-0.0462618	0.150926	-0.172543	0.389172	-0.28457	0.129879	0.445706	0.0680011	-0.158357	-0.0914914	-0.0542723	-0.00755688	-0.0645301	0.176744	0.0140217	M5 green Chromosome|0.6284
DEFB105B|Q8NG35	green	0.329796	0.0191098	-0.153712	-0.015631	0.626842	0.314872	-0.252833	0.249909	-0.129066	0.204356	0.139915	0.0474702	-0.228612	-0.164733	0.00591761	-0.14622	0.11148	0.294361	-0.185498	0.302237	-0.0849619	0.0981655	0.423585	-0.0329281	-0.218	-0.311601	-0.113842	0.0162705	0.0722849	0.0308976	0.178854	M5 green Chromosome|0.6268
JAG2|Q9Y219	green	0.208359	-0.0750365	-0.251883	-0.0106482	0.622349	0.222975	-0.288885	0.245593	-0.171026	0.0822506	0.0679904	0.0227143	-0.0862692	-0.227355	0.0612019	-0.0591948	0.277426	0.296076	-0.0951097	0.129616	-0.0350379	0.010278	0.542514	-0.121327	-0.220738	-0.203805	-0.00791417	-0.0678171	0.110005	-0.108402	0.122393	M5 green Chromosome|0.6223
DIDO1|Q9BTC0	green	0.338969	-0.0831986	-0.361978	-0.0362251	0.620333	0.209083	-0.481444	0.441534	-0.0561318	0.271643	-0.0596628	0.149005	-0.166233	-0.365026	-0.0347141	0.0404302	0.338414	0.518495	-0.0771709	0.218354	0.0808263	0.082817	0.504472	-0.0856358	-0.311531	-0.319871	-0.054586	-0.121343	0.214937	-0.140411	0.163076	M5 green Chromosome|0.6203
SEC61B|P60468	green	0.520923	0.215622	-0.0718701	-0.282312	0.610106	0.522945	-0.35485	0.347913	-0.374879	0.22514	0.322252	0.0694979	-0.258492	-0.298719	0.0389191	0.126394	0.00933897	0.352965	-0.138209	0.276216	-0.130146	0.300532	0.227746	0.0843471	-0.378933	-0.362458	-0.185942	0.0534807	-0.0651938	0.167416	0.186869	M5 green Chromosome|0.6101
PRH2|P02810	green	0.32808	-0.0762175	-0.286117	-0.0908995	0.606045	0.222809	-0.206096	0.0756533	-0.0744423	0.100396	0.116419	-0.039252	-0.407867	-0.109921	-0.29503	-0.0324006	0.0631049	0.119389	-0.328562	0.533361	-0.275212	0.0114974	0.272146	0.134919	-0.155633	-0.171054	-0.0505094	-0.116053	0.0819897	-0.163642	0.0108356	M5 green Chromosome|0.606
RNF146|Q9NTX7	green	0.422951	0.349544	-0.00599657	-0.3027	0.597433	0.341959	-0.294123	0.187846	-0.144447	0.26403	0.231467	0.041647	-0.240067	-0.338989	0.0275943	0.404166	-0.125776	0.427069	-0.049637	0.471997	-0.113933	0.445261	0.268897	-0.00842789	-0.486569	-0.380328	-0.289766	0.167751	-0.23788	0.220101	0.192808	M5 green Chromosome|0.5974
TGFBR2|P37173	green	0.497765	-0.0341924	-0.229865	0.00276939	0.59551	0.415284	-0.235739	0.211539	-0.132009	0.271534	0.243149	0.0300953	-0.467639	-0.158791	-0.205647	-0.16003	-0.203639	0.15875	-0.363438	0.573956	-0.271494	0.112551	0.0972564	0.252861	-0.263665	-0.307702	-0.157118	-0.129598	0.109864	0.127114	0.0176983	M5 green Chromosome|0.5955
CERS5|Q8N5B7	green	0.420594	-0.0170387	-0.19755	-0.144306	0.591092	0.303099	-0.14301	0.160051	-0.194297	0.14576	0.140512	-0.091841	-0.444916	-0.0767672	-0.284305	-0.0947849	-0.035572	0.110466	-0.301428	0.428053	-0.324635	0.0707981	0.181703	0.247741	-0.122312	-0.0962519	0.0339661	-0.171998	0.133236	-0.0732292	-0.0582304	M5 green Chromosome|0.5911
C8A|P07357	green	0.480998	-0.0387512	-0.370217	-0.142441	0.590923	0.393778	-0.399483	0.427765	-0.151757	0.377174	0.132687	0.130103	-0.358338	-0.33349	-0.051968	-0.097416	-0.0276554	0.388432	-0.284873	0.330838	-0.137077	0.167704	0.223333	0.130545	-0.221746	-0.320163	-0.0196697	-0.0995519	0.0924343	-0.0877664	0.16069	M5 green Chromosome|0.5909
C8B|P07358	green	0.481561	-0.0395105	-0.371356	-0.142061	0.590622	0.393706	-0.398699	0.428841	-0.151288	0.378394	0.1319	0.130256	-0.359191	-0.333974	-0.0517921	-0.0971962	-0.0299552	0.389479	-0.286247	0.329982	-0.137504	0.169072	0.223762	0.1323	-0.22163	-0.319051	-0.018822	-0.100812	0.0933271	-0.0869609	0.160473	M5 green Chromosome|0.5906
KLRC1|P26715	green	0.265336	0.188608	0.035088	-0.20604	0.588536	0.495912	-0.0585097	0.0482638	-0.37358	-0.0209526	0.452474	-0.146392	-0.241497	-0.022234	0.152538	-0.0554175	-0.111934	0.0704786	-0.274697	0.173725	-0.331891	-0.00506005	0.272541	0.00409889	-0.14511	-0.0876441	-0.136737	0.0653912	-0.0720877	0.0618405	0.0735361	M5 green Chromosome|0.5885
FBN3|Q75N90	green	0.538337	-0.0589479	-0.298647	-0.106063	0.58741	0.521386	-0.3081	0.501043	-0.342715	0.26576	0.224269	0.0485505	-0.39859	-0.235062	-0.044266	-0.213159	-0.0563884	0.31657	-0.355854	0.20528	-0.224134	0.0395973	0.0783811	0.20419	-0.152471	-0.235275	0.0817771	-0.125326	0.265015	-0.0903065	0.182593	M5 green Chromosome|0.5874
GPR26|Q8NDV2	green	0.486177	0.159272	-0.171943	-0.355226	0.587083	0.327145	-0.330662	0.380301	-0.0335037	0.242913	0.0545349	-0.0508116	-0.329007	-0.365417	-0.100011	0.044667	-0.00831538	0.445043	-0.0550926	0.383262	-0.173313	0.376276	0.361736	0.142402	-0.261559	-0.299264	-0.00120364	-0.00760856	-0.0693266	0.382743	0.134811	M5 green Chromosome|0.5871
PAWR|Q96IZ0	green	0.431331	0.113719	-0.0461098	-0.160936	0.58279	0.355767	-0.0642264	0.125964	-0.183823	0.092213	0.206946	-0.152947	-0.461438	-0.0296187	-0.222927	-0.220923	-0.249212	0.0770287	-0.281752	0.443396	-0.367602	0.133864	0.151423	0.199443	-0.133768	-0.137233	-0.0604413	0.0206966	0.00908473	0.0735484	0.0694276	M5 green Chromosome|0.5828
VAMP3|Q15836	green	0.390751	0.175445	-0.103894	-0.242559	0.580735	0.367194	-0.266444	0.274045	-0.208725	0.10246	0.173342	-0.0525313	-0.232202	-0.248582	0.026904	0.247186	0.0673361	0.359428	-0.0798408	0.248651	-0.163888	0.16262	0.353551	0.00666975	-0.264931	-0.145603	-0.0790007	0.0304921	-0.00756975	0.0536898	0.082424	M5 green Chromosome|0.5807
YME1L1|Q96TA2	green	0.45734	0.0493242	-0.217504	-0.126819	0.580373	0.462663	-0.272944	0.406257	-0.320339	0.200362	0.180663	0.0119358	-0.312732	-0.233376	-0.00307977	-0.172956	0.0710988	0.316367	-0.218618	0.151518	-0.173774	0.131438	0.284403	0.0460507	-0.206299	-0.279768	-0.011338	-0.0674636	0.128421	0.000476193	0.0990648	M5 green Chromosome|0.5804
PGK2|P07205	green	0.460363	0.192784	0.00339505	-0.19501	0.578932	0.494327	-0.213615	0.150243	-0.322653	0.274326	0.43501	0.0611011	-0.320515	-0.052445	0.0512777	-0.0742279	-0.267551	0.197441	-0.298129	0.439301	-0.233036	0.1924	0.100486	0.0792177	-0.424064	-0.335754	-0.362599	0.0665199	-0.0456602	0.16486	0.137903	M5 green Chromosome|0.5789
MRPL34|Q9BQ48	green	0.514829	-0.0301796	-0.318146	-0.109417	0.574241	0.446805	-0.281067	0.433629	-0.260115	0.156255	0.052422	-0.0911526	-0.46274	-0.279978	-0.211514	-0.227443	0.0770164	0.341004	-0.27354	0.241968	-0.302518	0.135473	0.177813	0.237903	-0.0931473	-0.195124	0.205787	-0.100776	0.180121	-0.160647	0.123803	M5 green Chromosome|0.5742
GPX5|O75715	green	0.178703	-0.0947145	-0.159142	-0.028983	0.571331	0.253964	-0.151211	0.0800688	-0.219532	0.0890992	0.209002	0.0019257	-0.161372	-0.0133227	0.0617708	-0.0817585	0.0541402	0.141795	-0.261152	0.167741	-0.149517	-0.0882091	0.446524	-0.0716693	-0.0990537	-0.0789958	-0.0775754	-0.123007	0.135596	-0.0161389	0.0593126	M5 green Chromosome|0.5713
PVRL3|Q9NQS3	green	0.29827	0.133338	-0.100143	-0.151996	0.569645	0.18335	-0.258303	0.213568	-0.0117423	0.152536	0.00883525	-0.050871	-0.158135	-0.302366	-0.0971566	0.0785338	0.165936	0.407399	0.0283469	0.398612	-0.103331	0.269788	0.40405	-0.10718	-0.310207	-0.265124	-0.0974644	0.0941654	-0.075308	-0.0282062	0.138553	M5 green Chromosome|0.5696
CDH15|P55291	green	0.340671	-0.111239	-0.295873	-0.205178	0.568109	0.271524	-0.091495	0.179349	-0.138738	0.0451718	0.0975192	-0.0976047	-0.467617	-0.0300636	-0.253296	-0.0973511	0.0606829	0.0157818	-0.381716	0.359852	-0.320756	-0.0840602	0.321405	0.356097	0.141364	0.049829	0.247417	-0.198374	0.190414	-0.024012	-0.0715975	M5 green Chromosome|0.5681
ITFG1|Q8TB96	green	0.229549	0.403727	0.31163	-0.436334	0.566675	0.437383	0.185225	-0.293816	-0.335739	-0.205143	0.527894	-0.376872	-0.311733	0.209613	0.0322592	0.15207	-0.358386	-0.106715	-0.204832	0.381854	-0.561175	0.100764	0.216465	0.0470903	-0.187529	-0.0587788	-0.307395	0.188967	-0.296053	0.232953	-0.0703538	M5 green Chromosome|0.5667
STOM|P27105	green	0.173998	0.0815229	-0.15777	-0.026921	0.561822	0.359878	-0.330835	0.19855	-0.241621	0.181296	0.256978	0.0730218	0.0143747	-0.282235	0.262013	-0.0052043	0.127889	0.386789	-0.0743001	0.0351481	-0.0236099	0.124411	0.48766	-0.209117	-0.373197	-0.357215	-0.207237	-0.0807812	0.0519495	0.0487769	0.0535482	M5 green Chromosome|0.5618
ACVR2B|Q13705	green	0.399902	-0.113447	-0.3918	-0.0199175	0.559798	0.140639	-0.49365	0.518501	0.0240194	0.327575	-0.188971	0.154226	-0.204458	-0.462312	-0.18149	-0.117383	0.311371	0.558226	-0.0329552	0.311316	0.0744145	0.200448	0.391973	-0.0747069	-0.301551	-0.304158	0.0580473	-0.0628302	0.166288	-0.0934403	0.248749	M5 green Chromosome|0.5598
KCNF1|Q9H3M0	green	0.365006	-0.0733206	-0.233643	0.169945	0.558241	0.258688	-0.24618	0.19982	-0.102176	0.187786	0.0685612	0.0198744	-0.377434	-0.249102	-0.221987	-0.227198	0.0124393	0.200514	-0.229623	0.403873	-0.169437	0.0849235	0.220271	0.0752097	-0.247825	-0.407361	-0.11708	-0.0173116	0.050121	-0.0882385	0.151731	M5 green Chromosome|0.5582
PARP1|P09874	green	0.24883	-0.0198866	-0.150092	-0.124296	0.5577	0.0536396	-0.101987	0.0607759	0.0510795	0.0220245	-0.0242287	-0.105156	-0.314495	-0.0783601	-0.269023	0.0959659	0.13791	0.114774	-0.129206	0.50185	-0.194436	0.0824813	0.416712	0.0417499	-0.112369	-0.0576997	0.0026328	-0.0063803	0.00202121	-0.0254246	0.0488214	M5 green Chromosome|0.5577
CKAP4|Q07065	green	0.490115	0.238039	-0.10055	-0.301544	0.542693	0.263296	-0.366735	0.312766	-0.0106949	0.265881	-0.0381325	-0.0143425	-0.311314	-0.35754	-0.205445	0.0149271	0.070341	0.530322	0.0193552	0.500637	-0.135843	0.452443	0.2143	-0.0160276	-0.384087	-0.34019	-0.121142	0.193616	-0.175429	0.0694106	0.257007	M5 green Chromosome|0.5427
HSD17B2|P37059	green	0.180867	0.103153	-0.0979375	-0.105473	0.535901	0.103413	-0.156193	0.068753	0.0146711	-0.0026195	0.0183237	-0.0998635	-0.207016	-0.139639	-0.122267	-0.00772527	0.177548	0.197805	-0.067732	0.321944	-0.147505	0.0880293	0.458121	-0.123731	-0.116033	-0.133108	-0.0394125	0.0404214	0.00905012	0.0175464	0.0597372	M5 green Chromosome|0.5359
COX6C|P09669	green	0.282453	0.177475	-0.00431625	-0.421464	0.532666	0.184671	-0.0432425	0.0320557	-0.0526075	-0.0323203	0.120037	-0.199027	-0.261429	-0.035292	-0.0941717	0.180264	-0.0991614	0.114187	-0.0578706	0.388521	-0.26796	0.146387	0.345337	0.145857	-0.0902389	-0.0342726	-0.0511776	0.074212	-0.117917	0.259904	0.0565882	M5 green Chromosome|0.5327
MAN1A1|P33908	green	0.411745	0.0474005	-0.13509	-0.125519	0.532246	0.234544	-0.231873	0.26087	-0.0407967	0.209358	0.00895831	-0.00958473	-0.350066	-0.195946	-0.212562	-0.0109492	0.0224507	0.323213	-0.154411	0.461731	-0.176524	0.14364	0.259056	0.0277859	-0.31894	-0.187738	-0.119311	0.056928	0.0436557	0.0132622	0.209885	M5 green Chromosome|0.5322
EMILIN3|Q9NT22	green	0.137567	-0.0292722	-0.0855953	-0.0139046	0.531275	0.185927	-0.0123503	0.02357	-0.17596	-0.12076	0.110375	-0.211733	-0.165851	-0.00676028	-0.0179538	-0.0871616	0.0816586	0.0951859	-0.131832	0.144423	-0.253835	-0.0934346	0.485431	0.0141804	-0.0459865	-0.0262122	0.0274676	-0.0398838	0.0887827	-0.0812079	-0.0190848	M5 green Chromosome|0.5313
KLRF1|Q9NZS2	green	0.240083	0.0525505	-0.191998	0.0701981	0.530576	0.131117	-0.314295	0.25145	-0.0295135	0.103023	-0.0559751	0.0777306	-0.124633	-0.218779	-0.0851933	-0.0386946	0.352943	0.282252	-0.00160049	0.253451	0.0519528	0.143801	0.410964	-0.153276	-0.236328	-0.253109	-0.0566487	-0.0820759	0.0977875	-0.0529878	0.00956944	M5 green Chromosome|0.5306
PPY|P01298	green	0.269362	0.0270171	-0.0340001	-0.110621	0.525314	0.231683	-0.00849841	0.0871322	-0.223895	-0.130238	0.118649	-0.2272	-0.273504	0.0741836	-0.176977	0.103792	0.159141	0.000780872	-0.15358	0.262306	-0.287357	-0.0568165	0.259895	0.0141944	-0.00923887	0.0599879	0.0409215	-0.00522263	0.139527	-0.0927383	0.00166552	M5 green Chromosome|0.5253
LAIR1|Q6GTX8	green	0.296328	0.21043	0.0140981	-0.137729	0.525028	0.501421	-0.172631	0.160728	-0.381471	0.0857833	0.407309	-0.042542	-0.115534	-0.187164	0.232565	0.0499108	-0.063374	0.328712	-0.145168	0.0806617	-0.193326	0.117553	0.223362	-0.0583339	-0.327902	-0.333364	-0.27037	0.0709882	0.0050773	0.01797	0.127584	M5 green Chromosome|0.525
SLC14A1|Q13336	green	0.265775	0.111943	-0.0910869	-0.0943565	0.517109	0.12708	-0.226263	0.114519	0.133493	0.122102	-0.0822369	-0.0666354	-0.200796	-0.194527	-0.15397	-0.0315008	0.134228	0.338744	0.00841296	0.451212	-0.100391	0.285449	0.422384	-0.130443	-0.23603	-0.272732	-0.111517	0.0575326	-0.107824	0.0601335	0.0524075	M5 green Chromosome|0.5171
KREMEN2|Q8NCW0	green	0.290882	-0.068571	-0.180531	-0.14827	0.513748	0.112085	0.0516388	0.0835797	-0.0750453	-0.0208583	0.0164723	-0.189361	-0.460048	0.0101234	-0.367753	-0.208756	0.00332315	-0.0631572	-0.281622	0.418885	-0.349097	-0.0469777	0.215699	0.331791	0.210357	0.0934084	0.33883	-0.0765851	0.0811611	-0.11251	-0.0092348	M5 green Chromosome|0.5137
RPRD1A|Q96P16	green	0.411308	0.0253305	-0.186709	-0.155287	0.503563	0.47849	-0.10499	0.245061	-0.344443	0.0994734	0.310348	-0.103131	-0.370431	-0.0999759	-0.0198814	-0.160744	-0.196707	0.134514	-0.34961	0.200584	-0.349389	0.0279973	0.114716	0.23344	-0.0793999	-0.107269	0.0866244	-0.156765	0.12574	0.00665312	-0.0402602	M5 green Chromosome|0.5036
ZNF174|Q15697	green	0.343284	0.251989	-0.112157	-0.333892	0.503449	0.391842	-0.451573	0.312212	-0.171111	0.252336	0.17488	0.107353	-0.0756975	-0.364129	0.190447	0.209513	0.0915409	0.535168	0.0233736	0.164958	0.0132766	0.357286	0.30854	-0.157942	-0.446318	-0.308177	-0.254212	0.0974573	-0.137424	0.0569266	0.177242	M5 green Chromosome|0.5034
UBE2B|P63146	green	0.346113	0.155693	-0.0742367	-0.237824	0.497923	0.146444	-0.217678	0.232739	0.0224323	0.158624	-0.00401595	-0.062996	-0.24771	-0.259758	-0.167253	0.0596284	0.065038	0.329304	-0.00839823	0.442334	-0.141777	0.312583	0.255397	-0.0175005	-0.236842	-0.257716	-0.0421559	0.0966665	-0.108827	0.0952253	0.194866	M5 green Chromosome|0.4979
GHRH|P01286	green	0.189369	0.265544	0.125327	-0.12731	0.488208	0.258099	-0.0461092	-0.10105	-0.0813547	0.0727581	0.327171	-0.0669548	-0.180726	-0.0355341	0.102796	0.126062	-0.15669	0.0865364	-0.154033	0.401585	-0.19659	0.20663	0.300738	-0.0428403	-0.285109	-0.258249	-0.304742	0.0873011	-0.192034	0.305758	-0.0144472	M5 green Chromosome|0.4882
MXI1|P50539	green	0.415132	0.0020426	-0.27723	-0.100669	0.487964	0.157742	-0.421582	0.432775	0.0110294	0.259684	-0.130567	0.153091	-0.227956	-0.355763	-0.170416	0.024664	0.266233	0.418462	-0.0185809	0.372446	0.0558917	0.256604	0.330804	-0.045401	-0.296694	-0.243559	-0.00746887	0.00801424	0.0814791	0.00987997	0.177597	M5 green Chromosome|0.488
HNRNPC|P07910	green	0.31002	-0.0413003	-0.327424	-0.0578854	0.484596	0.333007	-0.493313	0.494044	-0.179167	0.423702	0.16689	0.219074	-0.0622205	-0.465799	0.217886	-0.18947	0.098676	0.511803	-0.122012	0.0702403	0.0867973	0.163852	0.288665	-0.0531097	-0.274615	-0.334719	-0.0529097	-0.180362	0.103598	0.000478982	0.163695	M5 green Chromosome|0.4846
ANKRD1|Q15327	green	0.358495	0.210112	-0.0684816	-0.220058	0.475908	0.246709	-0.340743	0.194532	-0.039608	0.230267	0.064447	0.0699542	-0.18004	-0.268156	-0.102914	0.0995969	0.0649832	0.364356	0.00238282	0.442357	-0.0581008	0.341061	0.261149	-0.0456122	-0.415799	-0.340113	-0.235188	0.0527352	-0.123378	0.108206	0.0812076	M5 green Chromosome|0.4759
MAVS|Q7Z434	green	0.0801099	0.0363949	-0.0979482	0.00204998	0.475132	0.295229	-0.168508	-0.0435885	-0.307061	0.00798181	0.327526	0.0128069	-0.0211619	-0.0406818	0.236078	0.114674	0.0771009	0.0994639	-0.193006	0.0709529	-0.137279	-0.0840668	0.375561	-0.151433	-0.136315	-0.0710761	-0.14775	-0.0645467	-0.000196726	-0.0606416	-0.0534295	M5 green Chromosome|0.4751
RPS3A|P61247	green	0.150763	0.0489445	0.00665679	-0.256767	0.457231	0.371504	-0.0612814	0.189698	-0.414516	-0.0212998	0.323085	-0.132371	-0.0158681	-0.0582471	0.271048	0.0339714	0.0676327	0.148033	-0.0703787	-0.133393	-0.179794	-0.0764372	0.330592	-0.0748354	-0.0404154	-0.152969	0.00643765	0.0457298	0.0757752	-0.0192698	0.174099	M5 green Chromosome|0.4572
ADAMTSL1|Q8N6G6	green	0.294855	0.272274	0.112911	-0.166501	0.45334	0.234734	-0.136554	0.0239733	-0.0162948	0.0466981	0.14962	-0.106056	-0.200319	-0.0520358	-0.0889491	0.0842539	-0.0861766	0.196244	0.0191002	0.391179	-0.154204	0.275471	0.224575	-0.0438631	-0.406979	-0.254558	-0.421457	0.183917	-0.142163	0.197368	0.127047	M5 green Chromosome|0.4533
DEFB116|Q30KQ4	green	0.37121	-0.00202844	-0.203519	-0.108038	0.446988	0.194262	-0.174876	0.23707	-0.105927	0.101151	0.003335	0.00378232	-0.283443	-0.149321	-0.172886	0.185688	0.101346	0.207704	-0.115646	0.335562	-0.108147	0.11564	0.205554	0.0376346	-0.167385	-0.0733068	0.013592	-0.000911282	0.0903305	-0.0702822	0.0955029	M5 green Chromosome|0.447
LAIR2|Q6ISS4	green	0.277538	-0.183426	-0.277504	0.133692	0.442627	0.408264	-0.255441	0.244782	-0.252228	0.0636553	0.170134	0.0313489	-0.205683	-0.175575	-0.0088023	-0.182993	0.069217	0.192271	-0.268148	0.0272034	-0.11469	-0.158986	0.139503	-0.0145529	-0.183037	-0.237578	-0.0661377	-0.207648	0.253783	-0.0877786	0.0531889	M5 green Chromosome|0.4426
HSP90AA1|P07900	green	0.35018	0.0450371	-0.181187	-0.283355	0.44123	0.16044	-0.0183356	0.249343	-0.0832687	0.0723704	-0.107173	-0.202386	-0.377394	-0.268558	-0.239634	-0.0967925	-0.0351763	0.231153	-0.0750945	0.244893	-0.268737	0.229808	0.272919	0.280766	0.225211	0.086	0.461906	-0.0536839	-0.0232039	0.00990778	0.0173818	M5 green Chromosome|0.4412
HSP90AB1|P08238	green	0.345464	0.0369455	-0.186027	-0.280696	0.436904	0.154364	-0.0220021	0.252516	-0.0808774	0.0741175	-0.112775	-0.198234	-0.371516	-0.272871	-0.243447	-0.100712	-0.0254769	0.234327	-0.0690423	0.240923	-0.262983	0.22493	0.272862	0.275625	0.224883	0.0824847	0.465731	-0.0553191	-0.0169777	0.00143825	0.0211611	M5 green Chromosome|0.4369
FOXO3|O43524	green	0.244539	-0.0609445	-0.186472	-0.136587	0.43589	0.282532	0.00984015	0.131862	-0.253649	-0.0903513	0.156377	-0.169162	-0.346671	-0.00847419	-0.137479	-0.158136	0.0703245	-0.0297501	-0.314007	0.125314	-0.340873	-0.176508	0.131089	0.197472	0.209243	0.0944317	0.3044	-0.129643	0.145131	-0.191075	-0.0601537	M5 green Chromosome|0.4359
CENPV|Q7Z7K6	green	0.116078	0.0258211	-0.212803	-0.0647579	0.433789	0.256576	-0.397913	0.244978	-0.147399	0.239402	0.19623	0.157984	0.0768696	-0.348265	0.29253	-0.107666	0.117248	0.401509	-0.0375586	0.0319915	0.0644497	0.150804	0.383036	-0.227515	-0.373317	-0.327045	-0.186579	-0.0553305	-0.0506233	-0.0353531	0.106507	M5 green Chromosome|0.4338
TNFSF10|P50591	green	0.410496	0.298094	0.0507403	-0.346196	0.43116	0.259776	-0.189741	0.141014	-0.074146	0.0939885	0.0692151	-0.0555955	-0.261672	-0.166341	-0.126664	0.414205	-0.0416061	0.309061	0.0227536	0.401294	-0.157047	0.361189	0.202928	0.0436083	-0.317891	-0.130988	-0.196801	0.183912	-0.202295	0.239785	0.126203	M5 green Chromosome|0.4312
ULK3|Q6PHR2	green	0.215666	0.198723	-0.0151753	-0.193136	0.424144	0.268754	-0.144086	0.0495649	-0.183293	0.125455	0.221478	-0.0805563	-0.102892	-0.182409	0.108584	0.0687468	-0.1027	0.239225	-0.0483223	0.196632	-0.177823	0.245697	0.212961	-0.0327412	-0.262947	-0.207653	-0.149149	0.0924856	-0.165818	-0.00541606	0.104061	M5 green Chromosome|0.4241
INTS3|Q68E01	green	0.290474	0.0658454	-0.0652157	-0.165736	0.419064	0.178345	-0.190712	0.188521	-0.0511331	0.125441	0.0547586	-0.0599034	-0.217957	-0.137645	-0.0933666	0.00495024	0.0037954	0.220143	-0.0866539	0.318937	-0.164406	0.164313	0.219881	0.0329324	-0.118225	-0.0892752	-0.0302973	0.0347029	-0.0561275	-0.0748623	0.103755	M5 green Chromosome|0.4191
TARBP2|Q15633	green	0.355581	0.0865895	-0.150462	-0.132442	0.412101	0.266478	-0.0933216	0.0747931	-0.0908207	0.0992407	0.135733	-0.0489365	-0.355402	-0.150841	-0.189131	0.0232738	-0.170698	0.140841	-0.237792	0.416473	-0.250385	0.166372	0.121524	0.207287	-0.182565	-0.145514	0.0197289	-0.0411864	-0.0360412	0.0245953	-0.0135109	M5 green Chromosome|0.4121
LCTL|Q6UWM7	green	0.35422	-0.223624	-0.333412	0.150506	0.402254	0.112245	-0.242962	0.346063	0.0545588	0.203362	-0.144532	0.0786245	-0.277637	-0.217	-0.265364	-0.117579	0.169542	0.303532	-0.125977	0.350566	-0.0117655	0.0383103	0.127688	0.0209096	-0.204987	-0.251206	0.0208572	-0.0688095	0.249127	-0.102966	0.240269	M5 green Chromosome|0.4023
TOP1|P11387	green	0.207784	-0.141419	-0.309516	0.0799141	0.392401	0.00642138	-0.236221	0.211062	0.0972405	0.0768385	-0.171761	0.0426918	-0.191571	-0.189741	-0.207389	-0.107537	0.228726	0.209548	-0.070201	0.25335	-0.0168067	0.0264753	0.302877	-0.0303123	-0.116788	-0.23929	0.119489	-0.0444669	0.131528	-0.119521	0.126624	M5 green Chromosome|0.3924
MRE11A|P49959	green	0.352803	-0.0255048	-0.214167	-0.258857	0.385437	0.157725	-0.0162732	0.117184	-0.107773	0.0198645	0.00306055	-0.119669	-0.414363	-0.0218585	-0.294755	0.232129	-0.063841	0.026374	-0.224667	0.359899	-0.310958	0.000267168	0.0762891	0.314984	0.120246	0.133285	0.249013	-0.145568	0.0927137	-0.103475	-0.103972	M5 green Chromosome|0.3854
MMEL1|Q495T6	green	0.22081	-0.0540127	-0.216701	-0.133158	0.374432	0.127665	-0.298913	0.219364	0.0157017	0.15979	-0.0364688	0.0647178	-0.123775	-0.210844	-0.0593935	-0.00140803	0.151558	0.294286	-0.0712546	0.181911	0.0141574	0.0755626	0.344488	-0.0324227	-0.195776	-0.051543	0.0331418	0.0972085	-0.00592485	-0.103145	0.240693	M5 green Chromosome|0.3744
IL37|Q9NZH6	green	0.103748	-0.048009	-0.181104	0.00619597	0.343917	0.192975	-0.153963	0.0718743	-0.0832587	0.153494	0.214136	0.0668064	-0.124045	-0.150663	0.14597	-0.131282	-0.0835559	0.0951933	-0.239827	0.10142	-0.0809271	0.0174616	0.255225	0.0683754	-0.0994629	-0.199395	-0.0609752	-0.1092	-0.039463	0.00289207	0.0542834	M5 green Chromosome|0.3439
DSG1|Q02413	green	0.208988	-0.05663	-0.224264	0.0306536	0.341031	0.189576	-0.222188	0.104821	-0.00407703	0.192825	0.109405	0.08624	-0.191335	-0.187708	0.0371078	-0.0671907	-0.0860905	0.181869	-0.234072	0.24571	-0.0768463	0.0489671	0.210756	0.110514	-0.149883	-0.235793	-0.0343403	-0.15686	0.0117651	0.0869167	-0.0119165	M5 green Chromosome|0.341
VAMP8|Q9BV40	green	0.143707	-0.217174	-0.190646	0.138316	0.333026	0.179437	0.00513056	-0.0938893	-0.103008	-0.0111067	0.151507	0.0143657	-0.267709	0.209148	-0.187761	-0.169272	0.0217144	-0.150985	-0.354448	0.292832	-0.178224	-0.321244	0.0908098	0.0832754	-0.0339275	0.0322125	-0.0751009	-0.2174	0.286788	-0.141717	-0.142269	M5 green Chromosome|0.333
SERPINA6|P08185	green	0.294029	0.064405	-0.133701	-0.156897	0.331844	0.103096	-0.203642	0.22525	-0.0282429	0.12962	-0.0990629	0.00387771	-0.215435	-0.22945	-0.209757	-0.160888	0.149456	0.210338	-0.0398674	0.218566	-0.0406674	0.252463	0.288316	0.113976	-0.0829697	-0.132676	0.162771	-4.85e-05	0.0147207	0.0874058	0.0546567	M5 green Chromosome|0.3318
DCAF5|Q96JK2	green	0.149733	0.0549805	-0.0892514	-0.0757093	0.330047	0.115891	-0.167613	0.237299	-0.0492353	0.176288	0.150798	0.0735242	-0.0525451	-0.205189	0.0821542	0.0399939	0.0604496	0.171744	-0.0507204	0.174264	-0.00395886	0.0802164	0.18708	0.0106625	-0.116723	-0.173055	-0.0628086	-0.118332	0.027126	0.0493209	-0.0119935	M5 green Chromosome|0.33
BTNL9|Q6UXG8	green	0.273495	0.174366	0.125685	-0.0912678	0.320088	0.285904	0.000990653	0.00377779	-0.118432	-0.0252498	0.178739	-0.227025	-0.278303	-0.0305363	-0.0961324	-0.133579	-0.180538	0.107235	-0.14079	0.277705	-0.329919	0.142167	0.10009	0.0602672	-0.147669	-0.140138	-0.128606	0.0919379	-0.116752	0.214232	0.0367521	M5 green Chromosome|0.3201
TMPRSS6|Q8IU80	green	-0.00285256	0.177264	0.0873592	-0.0795119	0.306512	0.218334	0.0645938	0.0217094	-0.247611	-0.250732	0.195805	-0.321218	0.0497693	-0.0258514	0.198807	-0.0781902	0.129626	0.0894953	0.0769533	-0.139752	-0.254896	-0.0248408	0.267688	-0.262184	-0.066053	-0.145591	-0.0189896	0.178276	-0.0785192	-0.158509	0.0930611	M5 green Chromosome|0.3065
COX7A1|P24310	red	0.593784	0.125274	0.0337293	-0.204822	0.551002	0.894065	0.0526428	0.279484	-0.820346	0.127799	0.732276	-0.150045	-0.579296	0.117248	0.117938	-0.309561	-0.456065	-0.100642	-0.672951	0.0541197	-0.576606	-0.0887125	-0.159922	0.497598	0.0322258	-0.0893775	-0.0276161	-0.0878501	0.186474	0.0909489	0.0547252	M6 red Immune Activation|0.8941
MRAP|Q8TCY5	red	0.755431	0.0875342	-0.163464	-0.242141	0.63196	0.889119	-0.243871	0.480833	-0.655649	0.32605	0.555845	-0.0208405	-0.592918	-0.142302	0.0261755	-0.264021	-0.376788	0.195506	-0.578846	0.211068	-0.447819	0.0910269	-0.0848324	0.45272	-0.170484	-0.241196	-0.0510031	-0.0980128	0.169264	0.0724541	0.121988	M6 red Immune Activation|0.8891
FGFR3|P22607	red	0.78536	0.207366	-0.0984765	-0.349436	0.701096	0.8786	-0.195529	0.423777	-0.588824	0.248338	0.534573	-0.100814	-0.66637	-0.125639	-0.00520198	-0.156809	-0.392609	0.204339	-0.550549	0.333271	-0.498733	0.198894	-0.00440786	0.464843	-0.172849	-0.203886	-0.0528017	-0.0249136	0.0683173	0.194077	0.128277	M6 red Immune Activation|0.8786
CCL21|O00585	red	0.627485	0.0238847	-0.160867	-0.222632	0.529834	0.865326	-0.152845	0.42302	-0.713175	0.209237	0.549511	-0.029286	-0.512593	-0.0750067	0.0896344	-0.344717	-0.304431	0.101549	-0.585917	-0.00110174	-0.410763	-0.0241699	-0.0901684	0.433074	-0.0182089	-0.151473	0.0678675	-0.113307	0.208186	-0.0452141	0.12381	M6 red Immune Activation|0.8653
USB1|Q9BQ65	red	0.721252	0.15148	-0.0155049	-0.24125	0.524606	0.864057	-0.0226968	0.385098	-0.672583	0.203328	0.576486	-0.0998183	-0.661716	0.0515697	-0.0135395	-0.282564	-0.489543	-0.039038	-0.623321	0.202713	-0.516899	0.0423725	-0.232548	0.56438	-0.0264184	-0.140625	-0.0196554	-0.0582434	0.154239	0.0792065	0.0725985	M6 red Immune Activation|0.8641
HTR2A|P28223	red	0.836254	-0.00127285	-0.293378	-0.220343	0.639236	0.858251	-0.253421	0.570195	-0.600337	0.302508	0.431944	-0.052196	-0.761874	-0.205202	-0.150496	-0.32869	-0.345514	0.17965	-0.665362	0.26705	-0.504509	0.0871784	-0.131249	0.610487	-0.0415123	-0.18011	0.131928	-0.197266	0.26553	0.00407029	0.130054	M6 red Immune Activation|0.8583
TENM3|Q9P273	red	0.66136	-0.0768831	-0.199672	-0.115965	0.43522	0.842824	-0.155695	0.489894	-0.664235	0.362167	0.573311	0.133148	-0.561921	-0.0263355	0.103124	-0.365425	-0.460717	0.0197766	-0.713696	0.0826347	-0.328454	-0.0784728	-0.258691	0.567981	-0.0190299	-0.122272	0.0232342	-0.203235	0.289435	0.0507381	0.123921	M6 red Immune Activation|0.8428
TACSTD2|P09758	red	0.759698	0.0454077	-0.13348	-0.229346	0.652268	0.840484	-0.193879	0.478484	-0.610789	0.331541	0.516991	-0.00134758	-0.621267	-0.0901509	-0.0129054	-0.307117	-0.396261	0.148711	-0.58557	0.276294	-0.421218	0.0832524	-0.0691112	0.485829	-0.111325	-0.198452	0.0239525	-0.0811327	0.22026	0.114235	0.170676	M6 red Immune Activation|0.8405
CCDC51|Q96ER9	red	0.65317	0.117558	-0.153152	-0.246951	0.457378	0.832131	-0.218061	0.449938	-0.582346	0.297564	0.480258	0.0141226	-0.473404	-0.234263	0.0862923	-0.201157	-0.38576	0.239934	-0.44857	0.0785567	-0.356995	0.176084	-0.11585	0.403297	-0.187689	-0.252105	-0.0183822	-0.0397238	0.119096	0.0669351	0.140174	M6 red Immune Activation|0.8321
ZNF75D|P51815	red	0.630001	0.0713422	-0.0449806	-0.200188	0.492851	0.830617	-0.0539902	0.385331	-0.7216	0.206445	0.618311	-0.0687337	-0.539388	0.0123755	0.114172	-0.265041	-0.433165	-0.00505559	-0.61724	0.0660789	-0.456948	-0.0336096	-0.197108	0.523535	0.00295138	-0.0979626	0.011076	-0.109833	0.193191	0.0893134	0.101046	M6 red Immune Activation|0.8306
MAPT|P10636	red	0.591841	-0.0970785	-0.279131	-0.100958	0.507771	0.824959	-0.278361	0.473265	-0.666732	0.313599	0.528484	0.150709	-0.41936	-0.177238	0.18618	-0.260067	-0.309997	0.173319	-0.578263	-0.0332275	-0.26033	-0.0950871	-0.0693966	0.386377	-0.08924	-0.183189	0.0465288	-0.182584	0.307743	-0.00934182	0.133974	M6 red Immune Activation|0.825
MATK|P42679	red	0.534321	0.0183056	-0.022868	-0.183542	0.445937	0.823206	0.0319376	0.379348	-0.805574	0.258326	0.758461	-0.0193334	-0.459699	0.0540663	0.283004	-0.338192	-0.519912	-0.0894294	-0.683521	-0.0722482	-0.416743	-0.104197	-0.176224	0.592788	0.0744709	-0.0896102	0.0254018	-0.187615	0.239754	0.0970023	0.0885033	M6 red Immune Activation|0.8232
PPP1R14B|Q96C90	red	0.522064	0.0106531	-0.101598	-0.0913317	0.429865	0.821941	-0.0521051	0.345524	-0.757399	0.158402	0.620485	-0.0547746	-0.428052	-0.0151134	0.18782	-0.289419	-0.402855	0.00999534	-0.575467	-0.0786827	-0.431183	-0.0518768	-0.122642	0.428746	-0.0186871	-0.148395	0.0129405	-0.0900298	0.225245	-0.0173579	0.121453	M6 red Immune Activation|0.8219
PRKAA1|Q9Y478	red	0.516799	0.0200813	-0.111313	-0.126921	0.37656	0.813566	-0.194819	0.524953	-0.720621	0.256955	0.54508	0.0454405	-0.271794	-0.139548	0.292051	-0.31778	-0.275986	0.182067	-0.424996	-0.181431	-0.25939	-0.0111368	-0.160501	0.315662	-0.070356	-0.222594	0.0113722	-0.0887288	0.23336	-0.0578001	0.196383	M6 red Immune Activation|0.8136
[truncated: 3,027 more rows]

## Sheet: 3. Module GO Terms
Supplementary Table 3. CSF Network Module GO Term Enrichment
Enrichment of GO terms calculated as Fisher’s exact test p value transformed to z-score. Pruned output for non-redundant GO terms is displayed in Supplementary Figure 2.
[truncated: 10,215 more rows]
[truncated: 14 more columns]

## Sheet: 4. ANOVA Eigenproteins
Supplementary Table 4. CSF Network Eigenprotein Group Differences
[truncated: 35 more rows]

[truncated: 5 more sheets: 5. Differential Abundance, 6. Differential Abundance Count, 7. Cognitive Trajectories, 8. Sporadic PSP-RS, 9. BioFINDER 2 Olink]
